# Supplementary material for: Time and Covid-19 stress in the lockdown situation: Time free, «Dying» of boredom and sadness
Source: PLoS One. 2020 Aug 10;15(8):e0236465. doi: 10.1371/journal.pone.0236465 (PMC7416923; doi:10.1371/journal.pone.0236465)
Supplement: S1 Table — (XLSX) [file pone.0236465.s002.xlsx]

## Sheet: Feuil2
Sylvie Droit-Volet et al. (2020). Time and Covid-19 stress in the lockdown situation: Time Free, Dying of Boredom and Sadness. Plos One.
RecordID	Pays	Genre	Age	Travail1Domicile2	InquietSanteCovid	StessCovid	StressMaison	StressTravail	fatigue	Sommeil	AnxietePeur	HumeurMoral	BurnOut	Quelestvotrestatutprofessionnelactuel	Quelestvotreniveaudamp#233tudes	InquietEcomomie	Statutfamilial	Statutfamilial2single1noSingle	Nombretotaldenfants	TempsAvantEpidemie	TempsMaintenant	TempsJournée	TempsSemaine	ApaisementColereAvat	ApaisementColereNow	TristeJoieAvant	TristeJoieNow	CalmeExAvt	CalmeExNow	OccupeEnnuiAvt	OccupeEnnuiNow	PeurMortAvt	PeurMortNow	Taille	PoidsAvt	PoidsNow	difTimeAvtNow	difEnnuiAvtNow	difPeurMortAvtNow	difArousalAvtNow	difJoieAvtNow	difColèreAvtNow
2	France	Femme	25	2	20	82	77	85	50	76	72	25	50	&#233l&#232ve ou &#233tudiant	6	50	concubinage	1	0	100	74	75	98	8	50	76	33	0	1	40	59	24	23	172	64	64	26	-19	1	-1	43	-42
3	France	Femme	53	1	100	100	100	100	100	4	100	82	100	artisan, commer&#231ant ou chef d'entreprise	6	58	mari&#233	1	5	63	100	100	100		97	0	64		100	7	9			150	43	43	-37	-2			-64
5	France	Homme	58	1	19	16	90	87			14		77	artisan, commer&#231ant ou chef d'entreprise	5	77	mari&#233	1	3	48	87	90	87											164	70	73	-39
6	France	Femme	42	2	44	29	17	47	19	65	26	82	60	cadre et profession intellectuelle sup&#233rieure	6	82	c&#233libataire	2	0	71	73	72	77	50	50	50	50	50	50	50	50	50	50				-2	0	0	0	0	0
7	France	Homme	52	2	56			22		7	38	23	1	artisan, commer&#231ant ou chef d'entreprise	4	96	PACS&#233	1	2	59	90	89	87								30		53	182	83	84	-31
8	France	Femme	48	2	75	76	31	50	71	21	50			&#224 la recherche d'un emploi	4	96	PACS&#233	1	3	71	22	61	93	36	37	59	36	39	38	25	26	34	34	164	62	62	49	-1	0	1	23	-1
9	France	Femme	27	2	100	69	28	0	0	85	78	35	0		2	100	c&#233libataire	2	0	100	19	21	0	50	61	64	51	78	100	31	73	100	100	170	77	76	81	-42	0	-22	13	-11
10	France	Homme	49	2	78	76	21	100	68	50	100	76	25	ouvrier	2	100	mari&#233	1	0	38	67	64	69	22	36	76	87	50	50	31	61	61	80	179	72	72	-29	-30	-19	0	-11	-14
11	France	Femme	32	2	50	30	31	50	62	50	50	50	50	cadre et profession intellectuelle sup&#233rieure	5	67	mari&#233	1	2	70	50	50	50	50	50	50	51	50	50	41	50	50	50	171	57	57	20	-9	0	0	-1	0
12	France	Femme	27	2	66	60	71	65	69	27	68	29	12	cadre et profession intellectuelle sup&#233rieure	5	74	concubinage	1	0	48	60	70	59	63	62	59	43	76	60	15	61	17	28	178	83	84	-12	-46	-11	16	16	1
15	France	Femme	37	2	70	100	80	84	78	83	81	86	64	profession interm&#233diaire	4	87	mari&#233	1	2	90	10	78	11	50	83	68	23	77	84	20	19	20	64	168	81	79	80	1	-44	-7	45	-33
16	France	Homme	39	2	36	15	0	20	9	82	10	71	59	artisan, commer&#231ant ou chef d'entreprise	4	66	c&#233libataire	2	0	81	61	62	61	79	32	40	63	64	34	0	24	21	22	176	118	122	20	-24	-1	30	-23	47
17	France	Femme	40	2	69	66	67	50		61	62	43	21	cadre et profession intellectuelle sup&#233rieure	6	96	PACS&#233	1	0	66	72	72	66	29	60	69	31	33	61	29	39	31	70	174	60	60	-6	-10	-39	-28	38	-31
18	France	Femme	42	1	50	46	20	50	50	50	50	50	75	profession interm&#233diaire	4	82	c&#233libataire	2	0	69	70	73	70	50	50	50	50	50	50	50	50	9	76	160	58	58	-1	0	-67	0	0	0
19	France	Femme	54	2	0	0	0	71	0	100	68	60	0	cadre et profession intellectuelle sup&#233rieure	5	82	concubinage	1	1	50	0	0	0	50	50	50	33	0	0	50	50	50	50	165	65	66	50	0	0	0	17	0
20	France	Femme	60	2	25	15	0	0	0	72	19	86	0	retrait&#233	4	100	mari&#233	1	0	96	36	37	50	59	13	80	64	69	0	5	51	58	60	159	57	59	60	-46	-2	69	16	46
21	France	Homme	51	2	65	50	28	50	35	33	36	50	31	profession interm&#233diaire	2	92	c&#233libataire	2	0	73	38	39	36	50	28	50	50	66	28	27	32	49	69	178	70	70	35	-5	-20	38	0	22
22	France	Femme	23	2	0	0	0	0	0	100	0	100	0	profession interm&#233diaire	2	28	c&#233libataire	2	0	81	63	70	73	7	9	93	95	92	93	5	4	10	9	169	63	63	18	1	1	-1	-2	-2
23	France	Homme	53	2	67	20	19	50	50	50	50	32	50	cadre et profession intellectuelle sup&#233rieure	5	71	veuf	3	3	50	50	50	50														0
24	France	Femme	56	1	2	0	2	18	50	86	2	77	4	profession interm&#233diaire	2	69	mari&#233	1	3	100	71	99	96	5	25	96	78	27	27	4	0	4	2	168	56	55	29	4	2	0	18	-20
27	France	Femme	35	2	15	66	22	62	0	96	61	37	21			83	c&#233libataire	2	0	52	29	30	37	37		74		28		32	67	18	40	168	77	77	23	-35	-22
28	France	Femme	37	2	50	50	50	94	50	50	50	50	50	cadre et profession intellectuelle sup&#233rieure	5	74	c&#233libataire	2	0	50	50	50	50	0	1	100	100	50	45	50	50	50	50	173	81	81	0	0	0	5	0	-1
30	France	Femme	52	2			92		80	14	62		81	cadre et profession intellectuelle sup&#233rieure	6		mari&#233	1	1	75	13	15	50											144			62
31	France	Homme	60	2	26	24	46	76	62	31	33	34	1	profession interm&#233diaire	4	83	mari&#233	1	2	46	66	65	65	31	50	29		30			15	3	17	185	83	86	-20		-14			-19
32	France	Femme	49	1	6	5	8	50	0	47	5	77	47	ouvrier	4		mari&#233	1	0	88	35	46	45	10	50	100	78	98	87	0	15	0	0	165	66	66	53	-15	0	11	22	-40
33	France	Femme	34	2	72	64	24	50	28	50	73	50	26	profession interm&#233diaire	4	71	mari&#233	1	4	99	98	100	100	50	50	96	98	50	50	4	2	31	30	169	75	75	1	2	1	0	-2	0
34	France	Homme	47	2	74	72	9	50	99	70	19	78	76	profession interm&#233diaire	4	71	mari&#233	1	2	77	20	50	50	74	19	34	74	88	11	0	0	50	50	180	85	85	57	0	0	77	-40	55
36	France	Femme	29	2	74	83	50	50	78	18	87	50	18	cadre et profession intellectuelle sup&#233rieure	6	26	PACS&#233	1	0	82	13	16	32	50	76	82	31	50	50	4	70	74	80	170	54	53	69	-66	-6	0	51	-26
37	France	Homme	66	2	75	26	14	9	4	58	50	78	6	retrait&#233	5	84	mari&#233	1	3	80	69	50	41	34	37	61	63	57	40	26	50	7	9	189	81	81	11	-24	-2	17	-2	-3
38	France	Femme	44	2	25	75	50	50	75	30		41	69	cadre et profession intellectuelle sup&#233rieure	5	91	mari&#233	1	3	75	29	71	25	50	69	68	29	67		16	17	50	50	169	58		46	-1	0		39	-19
39	France	Femme	38	2	76	71	47				75	68		&#224 la recherche d'un emploi	4	100	mari&#233	1	2	100	23	22	13	50						0	92	2	83	170	77	77	77	-92	-81
40	France	Femme	41	1	89	92	7	72	82	21	100	27	41	profession interm&#233diaire	4	87	c&#233libataire	2	2	79	20	25	50	13	50	90	13	14	59	11	27	50	77	176	64	64	59	-16	-27	-45	77	-37
42	France	Femme	55	2	50	50	93	95	94	50	50	50	95	cadre et profession intellectuelle sup&#233rieure	6	91	mari&#233	1	2	85	84	87	89	50	50	50	50	50	50	32	8	50	50	162	64	64	1	24	0	0	0	0
44	France	Femme	37	2	2	10	3	6	3	50	15		16	profession interm&#233diaire	4	83	PACS&#233	1	2	70	16	16	13	50	51	84	13	50	50	13	87	50	50	168	73	73	54	-74	0	0	71	-1
45	France	Femme	25	2	60	83	15	78	60	30	86	25	72	&#233l&#232ve ou &#233tudiant	6	0	c&#233libataire	2	0	59	57	68	64	37	94	60	42	63	42	11	33	79	70	176	69	69	2	-22	9	21	18	-57
47	France	Femme	28	1	66	69	59	68	62	50	66	52	50	&#233l&#232ve ou &#233tudiant	6	73	PACS&#233	1	0	100	66	69	66	15	38	100	52	5	26	2	11	13	14	175	74	75	34	-9	-1	-21	48	-23
48	France	Femme	63	2	77		27	1	2	98			3	retrait&#233	1	83	mari&#233	1	3	97	99	86	85	81	36	67	30	37	65	0	3	50	66	172			-2	-3	-16	-28	37	45
50	France	Femme	49	2	50	81	87	98	81	50	79	79	100	cadre et profession intellectuelle sup&#233rieure	5	100	concubinage	1	3	90	21	27	31	21	68	74	50	10	53	21	69	10	17	168	73	76	69	-48	-7	-43	24	-47
51	France	Femme	44	2	50	50	78	1	50	50	50	50	0	&#224 la recherche d'un emploi	5	100	mari&#233	1	2	43	77	83	83	50	50	50	100	50	50	50	87	50	50	162	59	60	-34	-37	0	0	-50	0
52	France	Femme	63	2	74	0	80	50	85	20	84	63	50	artisan, commer&#231ant ou chef d'entreprise	2	0	mari&#233	1	3	49	3	13	10	17	50	50	9	17	50	8	55	26	91	162	62	64	46	-47	-65	-33	41	-33
53	France	Femme	33	2	63	65	35	67	73	75	36	59	33	cadre et profession intellectuelle sup&#233rieure	5	75	PACS&#233	1	0	73	35	34	30	50	50	39	29	50	50	50	50	49	50	166	80	78	38	0	-1	0	10	0
54	France	Femme	52	2	89	82		78	90	83	64	77	84	cadre et profession intellectuelle sup&#233rieure	5	50	autre		2	92	77	85	77	28	72	79	28	50	50	10	75	50	50	165	65	65	15	-65	0	0	51	-44
57	France	Femme	28	2	53	58	0	75	20	28	50	75	79	cadre et profession intellectuelle sup&#233rieure	5	84	PACS&#233	1	0	94	63	66	64	50	30	73	72	71	50	0	32	40		173	75	77	31	-32		21	1	20
59	France	Femme	43	2	1	2	1	0	2	98	3	82	2	artisan, commer&#231ant ou chef d'entreprise	2	53	mari&#233	1	2	98	99	87	100	100	0	50	76	93	0	7	7	51	52	169	58	58	-1	0	-1	93	-26	100
60	France	Femme	27	2	27		3	100	97	1	15	25	97	cadre et profession intellectuelle sup&#233rieure	6	22	concubinage	1	0	69	100	100	98	63	56	46	35	73	97	2	4	18	19	159	58	58	-31	-2	-1	-24	11	7
61	France	Femme	23	2	62	86	75				73	63		&#224 la recherche d'un emploi	2	72	concubinage	1	0	90	49	68	64			76	36			23	80	23	60	151			41	-57	-37		40
64	France	Femme	34	2	22	73	20		100	50	65	36		profession interm&#233diaire	4	70	mari&#233	1	2	57	100	100	100	76	24	22	63	25	58	77	7	20	21	177	76	77	-43	70	-1	-33	-41	52
66	France	Femme	52	1		19	20	20	17	16	16	76	20	agriculteur, exploitant	2	93	c&#233libataire	2	1	61	36	27	28							28	69			174	71	70	25	-41
67	France	Femme	47	2	100	50	83	0	50	50	70	50	0	profession interm&#233diaire	2	100	mari&#233	1	1	98	50	50	50	50	53	74	25	75	50	0	50	50	74	157	77	76	48	-50	-24	25	49	-3
69	France	Femme	51	2	83	69	57	0	38	64	65	61	3	ouvrier	4	90	mari&#233	1	3	78	36	50	33	13	73	77	34	50	50	5	50	50	50	159	63	63	42	-45	0	0	43	-60
70	France	Femme	29	2	50	32	60	36	61	5	32	0	57	cadre et profession intellectuelle sup&#233rieure	6	88	PACS&#233	1	0	78	19	18	0	36	37	18	18	77	50	33	76	59	61	162	63	65	59	-43	-2	27	0	-1
72	France	Femme	21	2	28	77	24	0	20	25	76	50	0	artisan, commer&#231ant ou chef d'entreprise	4	94	autre		0	100	37	40	29	23	71	87	29	39	26	0	76	14	63	163	50	53	63	-76	-49	13	58	-48
73	France	Femme	42	2	0	0	95	0	0	0	0	0	0		2	100	mari&#233	1	2	100	24	27	0	50	70	87	50	50	50	0	72	22	22	184	115		76	-72	0	0	37	-20
74	France	Femme	60	1	50	27	24	50	50	50	31	29	10	ouvrier	2	100	c&#233libataire	2	2	96	66	70	50	34	34	79	50	25	25	1	0	9	19	164	47	48	30	1	-10	0	29	0
75	France	Femme	49	2	66	69	35	14	65	30	67	67	5	cadre et profession intellectuelle sup&#233rieure	4	73	mari&#233	1	2	83	58	36	50	50	50	50	50	50	50	36	38	23	23	171	73	71	25	-2	0	0	0	0
76	France	Femme	24	2	64	79	0	49	2	64	59	28	0	cadre et profession intellectuelle sup&#233rieure	6	71	c&#233libataire	2	0	83	57	59	59	36	62	58	39	37	56	2	66	3	3	162	55	55	26	-64	0	-19	19	-26
77	France	Femme	36	2	79	80	100	100	100	0	0	0	84	cadre et profession intellectuelle sup&#233rieure	5	100	PACS&#233	1	2	100	100	100	100	0	69	100	6	50	50	0	0	73	71	168	66	66	0	0	2	0	94	-69
78	France	Femme	44	2	68	70	36	83	63	36	65	50	50	cadre et profession intellectuelle sup&#233rieure	6	87	mari&#233	1	2	72	80	80	84	65	50	50	50	61	50	17	39	47	67	176	62	60	-8	-22	-20	11	0	15
79	France	Femme	38	2	23	14	24	82				87	89	artisan, commer&#231ant ou chef d'entreprise	4	100	concubinage	1	1	96	70	77	75	20	24	90	93	95	25	7	11	9	15	165	61	65	26	-4	-6	70	-3	-4
80	France	Femme	44	2	60	50	23	85	50	50	22	10	10	artisan, commer&#231ant ou chef d'entreprise	5	77	PACS&#233	1	2	44	66	61	61	74	35	41	50	67	33	17	14	50	50	165	62	62	-22	3	0	34	-9	39
82	France	Femme	46	2	50	50	50	50	50	50	50	50	50	profession interm&#233diaire	4	37	mari&#233	1	2	78	77	77	78	21	22	92	82	30	32	20	0	73	65	166	58	60	1	20	8	-2	10	-1
83	France	Femme	54	2	92	93	50	3	5	73	89	82	4	cadre et profession intellectuelle sup&#233rieure	4	73	concubinage	1	0	97	78	81	87	50	49	79	7	83	22	4	17	64	87	171	109	112	19	-13	-23	61	72	1
86	France	Femme	56	2	33	35	19	53	18	78	27	74	1	cadre et profession intellectuelle sup&#233rieure	6	100	c&#233libataire	2	3	100	78	79	63	27	19	66	26	52	26	0	24	14	39	168	63	62	22	-24	-25	26	40	8
87	France	Femme	72	2	80	21	19		32	24	31	26		retrait&#233	4	97	mari&#233	1	2	94	69	71	71	20	78	78	41	33	45	17	63	23	71	168	54	54	25	-46	-48	-12	37	-58
88	France	Femme	21	2	70	29	28	82	0	35	74	23	0	&#233l&#232ve ou &#233tudiant	2	0	c&#233libataire	2	0	100	0	0	0	43	100	67	0	100	79	0	100	0	27	170	50	55	100	-100	-27	21	67	-57
89	France	Homme	36	2	50	100	100	68	0	71	50	0	50	cadre et profession intellectuelle sup&#233rieure	4	50	c&#233libataire	2	0	100	0	0	0	47	100	81	0	22	100	21	100	79	86	184	87	84	100	-79	-7	-78	81	-53
90	France	Homme	61		22	10	22	88	91	74	0	93	19	artisan, commer&#231ant ou chef d'entreprise	5	83	mari&#233	1	5	79	100	100	89	86	13	17	74	88	90	57	6	8	16	174	74	74	-21	51	-8	-2	-57	73
91	France	Homme	29	2	0	0	0	0	0	0	0	0	0	ouvrier	2	100	c&#233libataire	2	0	100	28	28	28	5	4	90	95	4	5	5	94	19	18	169	55		72	-89	1	-1	-5	1
92	France	Femme	53	2	73	50	10	53	12	89	14	64	56	cadre et profession intellectuelle sup&#233rieure	4	80	mari&#233	1	3	98	79	94	80	14	58	96	63	50	50	13	19	10	50	167	69	67	19	-6	-40	0	33	-44
93	France	Homme	37	2	66	50	22	19	13	12	50	65	12	artisan, commer&#231ant ou chef d'entreprise	4	73	mari&#233	1	3	89	23	53	50	17	0	80	50	12	16	9	73	50	0	172	73	73	66	-64	50	-4	30	17
94	France	Femme	66	2	100	50	50	50	50	50	50	50	50	retrait&#233	2	63	mari&#233	1	2	79	50	50	50	50	61	65	50	50	50	19	50	50	50	158	60	60	29	-31	0	0	15	-11
95	France	Homme	57	2	70	50	50	19	27	76	65	34	25	retrait&#233	5	92	mari&#233	1	5	94	15	28	24	22	50	73	50	22	28	23	79	15	69	187	90	90	79	-56	-54	-6	23	-28
97	France	Femme	43	1	50	50	50	100	100	77	50	50	100	cadre et profession intellectuelle sup&#233rieure	4	21	autre		2	95	71	77	39	54	92					50				163	64	65	24					-38
98	France	Femme	36	2	25		6	6	6	2		26	5	profession interm&#233diaire	4	78	PACS&#233	1	2	89	47			11	65	90	29	50		5		4	3		66	66	42		1		61	-54
99	France	Femme	24	2	64	36	34	50	66	62	80	20	92	profession interm&#233diaire	5	90	concubinage	1	0	82	80	81	85	50	22	71	74	73	90	20	61	13	10	171	64	64	2	-41	3	-17	-3	28
100	France	Homme	33	2	12	10	92	0	0	77	10	23	0	ouvrier	2	77	c&#233libataire	2	1	70	8	0	28	18	76	74	30	23	66	19	78	0	0	180	79	78	62	-59	0	-43	44	-58
101	France	Femme	47	2	100	100	82				72	34		ouvrier	2	81	mari&#233	1	3	100	35	37	27	22	94	92	13	49		11	26	21	77	158	95	95	65	-15	-56		79	-72
103	France	Femme	29	2	65	72	68	0	42		71	40	0	cadre et profession intellectuelle sup&#233rieure	6	61	mari&#233	1	0	95	28	40	76	15	50	86	19	50	50	13	70	30	50	163	55	61	67	-57	-20	0	67	-35
104	France	Femme	43	2	83	90	83	50	48	55	70	35	32	&#224 la recherche d'un emploi	4	86	mari&#233	1	3	87	50	50	50	50	50	50	50	48	64	50	50	50	76	160			37	0	-26	-16	0	0
105	France	Femme	60	1	100	100	38	100	62	50	64	34	39	profession interm&#233diaire	2	100	autre		0	100	4	0	7	10	75	75	20	72	77	83	87	17	100	165			96	-4	-83	-5	55	-65
106	France	Homme	61	2	100	100	98		99	98	100			retrait&#233	2	100	mari&#233	1	1	90	79	37	38	81	98	77	30	63	97	11	80	58	92	179	84	84	11	-69	-34	-34	47	-17
109	France	Homme	49	2	73	80	90	84	90	28	50	30	83	cadre et profession intellectuelle sup&#233rieure	4	82	mari&#233	1	2	76	50	38	50	67	80	83	50	50	77	22	10	50	50	180	75	76	26	12	0	-27	33	-13
113	France	Femme	29	2	61	61	45	2	2	1	33	35	0	cadre et profession intellectuelle sup&#233rieure	6	78	PACS&#233	1	0	77	60	50	50	31	46	89	80	22	65	0	66	0	0	163	63	63	17	-66	0	-43	9	-15
117	France	Femme	45	2	75	28	68	70	0	2	26	71	22	cadre et profession intellectuelle sup&#233rieure	4	100	mari&#233	1	3	77	0	3	6	67	67	72	70	81	78	0	100	4	4	166	68	65	77	-100	0	3	2	0
118	France	Homme	64	2	65	27	8	10	14	94	13	93	7	cadre et profession intellectuelle sup&#233rieure	2	68	mari&#233	1	2	75	80	80	82	15	12	50	50	13	13	16	20	15	18	171	55	55	-5	-4	-3	0	0	3
119	France	Femme	36	1	77	76	61	63	78	33	71	67	68	profession interm&#233diaire	2	83	PACS&#233	1	0	50	50	50	50	50	50									170	55	55	0					0
120	France	Femme	54	2	12	16	27	20	18	14	4		4	cadre et profession intellectuelle sup&#233rieure	4	3	mari&#233	1	4	96	90	89	89	9	11	94	93	8	6	9	9	0	2	164	50	52	6	0	-2	2	1	-2
121	France	Homme	63	2		75			99	32	73			artisan, commer&#231ant ou chef d'entreprise	5	80	mari&#233	1	6	95	77	85	98	25	31	79	58	50	50	50	81	50	77	176	73	73	18	-31	-27	0	21	-6
123	France	Homme	21	2	77	2	5	0	9	72	62	50	4	&#224 la recherche d'un emploi	4	96			0	98	61	75	32	76	19	62	29			16	87	11	75	182	60	61	37	-71	-64		33	57
124	France	Femme	40	2	100	100	69	80	76	0	100	14	50	cadre et profession intellectuelle sup&#233rieure	5	100	mari&#233	1	3	81	50	50	50	50	96	75	26	64	41	3	43	11	100	164	55	53	31	-40	-89	23	49	-46
125	France	Femme	43		97	100	72	81	19	50	90		0	profession interm&#233diaire	4	74	mari&#233	1	2	100	86	82	85	0	66	95	29			0		0	100	170	55	55	14		-100		66	-66
126	France	Femme	55	1	50	50	50	50	50	68	50	50	75		2	50	mari&#233	1	3	93	52	96	97	50	75	84	50	28	73	10	34	6	50	165	60	60	41	-24	-44	-45	34	-25
127	France	Femme	33	1		79		82		17	39	20		profession interm&#233diaire	2		c&#233libataire	2	1	71	23	22	20		62	70	32	73	29	23	73	64	67	155	54	56	48	-50	-3	44	38
129	France	Femme	45	2	76	74	50	74	50	28	70	50	68	cadre et profession intellectuelle sup&#233rieure	4	74	mari&#233	1	2	65	32	32	35	63	63	51	36	73	50	13	73	13	16	157	66	69	33	-60	-3	23	15	0
131	France	Femme	17	2		17	19		1	4	4	79	0	&#233l&#232ve ou &#233tudiant	2	79	c&#233libataire	2	0	73	4	16	78	30	77	86	26	22	22	18	92	95	97	171	52	52	69	-74	-2	0	60	-47
133	France	Femme	37	2	97	76			28	100	86	78		ouvrier	2	100	mari&#233	1	2	100	28	25	72		62	40	43	70	80	50	20	74	78	168	95	97	72	30	-4	-10	-3
136	France	Homme	41	2	3	27	22	23	40	46	25	74	38	profession interm&#233diaire	5	70	mari&#233	1	3	90	83	86	84	4	37	96	68	49	64	3	5	20	22	192	105	105	7	-2	-2	-15	28	-33
137	France	Femme	60	2	69	65	66		86	100	66	30		profession interm&#233diaire	2	84	mari&#233	1	3	76	50	44	68	35	72	52	35	38	50	24	68	25	27	148	50	49	26	-44	-2	-12	17	-37
139	France	Femme	20	2	38	0	0	0	0	100	0	29	0	&#233l&#232ve ou &#233tudiant	4	0	c&#233libataire	2	0	80	26	8	63	21	0	100	68	17	0	61	94	58	40	166	68	66	54	-33	18	17	32	21
141	France	Homme	42	2	80	71	25	29	25	84	83	79	39	cadre et profession intellectuelle sup&#233rieure	5	75	concubinage	1	1	87	38	69											78	170	63	65	49
142	France	Femme	18	2	50	64	100	58	52	42	61	29	50	&#233l&#232ve ou &#233tudiant	2	72	c&#233libataire	2	0	50	50	50	50	50	50	40	24	50	36	19	59	50	50	171	80	78	0	-40	0	14	16	0
143	France	Homme	45	2	17	21	21	19	15	17	15	13	14	artisan, commer&#231ant ou chef d'entreprise	6	89	mari&#233	1	5	66	22	19	21	50	68				69	27	73	20	21	183	87	87	44	-46	-1			-18
146	France	Femme	19	2	78	52	72	100	0	90	50	24	28	&#233l&#232ve ou &#233tudiant	2	100	c&#233libataire	2	0	68	28	62	64		68	28	11			0				168	49	50	40				17
148	France	Femme	52	2	100	100	99	97	100	100	100	100	100	cadre et profession intellectuelle sup&#233rieure	4	100	mari&#233	1	3	79	50	50	50	50	66	81	23	61	64	3	25	50	77	166	70	71	29	-22	-27	-3	58	-16
149	France	Femme	41	2	50	50	95	98	50	3	50	22	50	cadre et profession intellectuelle sup&#233rieure	6	95	mari&#233	1	2	91	85	80	89	50	78	50	52	50	50	14	13	50	50	170	59	59	6	1	0	0	-2	-28
151	France	Femme	16	2	83	81	80	84	26	50	73	65	50	&#233l&#232ve ou &#233tudiant	1	50				44	93	93	94	50	67	62	35	46	67	36	16	50	50	168	62	62	-49	20	0	-21	27	-17
153	France	Femme	50	1	50	61	79	74	77			59	65	cadre et profession intellectuelle sup&#233rieure	6	100	mari&#233	1	4	82	23	50			80	78	22		78	23		29	73	164	50	50	59		-44		56
154	France	Homme	55	1	68	23	17	70	12	11	62	10	10	cadre et profession intellectuelle sup&#233rieure	6	77	mari&#233	1	3	77	24	23	20	52	50	50	50	50	50	18	64	31	67	177	74	74	53	-46	-36	0	0	2
155	France	Femme	52	2	82	69	50	50	50	0	64	50	50	cadre et profession intellectuelle sup&#233rieure	4	50	concubinage	1	2	100	36	80	63	47	58	50	50	50	50	20	65	50	45	170	95	95	64	-45	5	0	0	-11
159	France	Femme	53	2	14	75	15	14	86	34	68	27	69	artisan, commer&#231ant ou chef d'entreprise	5	67	PACS&#233	1	0	69	35	47	52	50	50	75	25	54	62	17	4	71	69	160	60	57	34	13	2	-8	50	0
161	France	Femme	33	2	23	25	38	35	17	66	27	41	34	&#224 la recherche d'un emploi	5	74	c&#233libataire	2	0	62	36	43	31	23	36	67	42	40	51	39	67	0	0	150	50	51	26	-28	0	-11	25	-13
162	France	Femme	30	2	78	79	64	50	89	32	71	35		&#224 la recherche d'un emploi	4	70	PACS&#233	1	2	71	91	95	93														-20
164	France	Femme	17	2	76	73	98		82	83	76	77		&#233l&#232ve ou &#233tudiant	2	77	c&#233libataire	2	0	18	91	91	82	66	97	32	17	50	68	10	0	79	77	171	60	60	-73	10	2	-18	15	-31
165	France	Femme	45	2	69	71	72	73	52	84	69	78	30	cadre et profession intellectuelle sup&#233rieure	5	75	mari&#233	1	2	73	74	86	68	26	25	69	66	50	50	26	13	26	26	166	76	74	-1	13	0	0	3	1
166	France	Femme	33	2	76	48	91	71	100	50	50	50	2	profession interm&#233diaire	4	79	c&#233libataire	2	3	71	100	94	96	76	49	30	68	100	50	7	19	50	50	165	58	56	-29	-12	0	50	-38	27
167	France	Homme	35	2	27	28	66	32	21	48	22	80	25	cadre et profession intellectuelle sup&#233rieure	5	77	autre		2	83	65	70	67	33	44	72	61	18	29	35	70	18	19	180	67	67	18	-35	-1	-11	11	-11
169	France	Femme	29	1	70	78	20	82		18	77	77	70	cadre et profession intellectuelle sup&#233rieure	6	69	mari&#233	1	1	100	4	12	20	30	52	68	29	30	29	8	63	8	67	163	48	48	96	-55	-59	1	39	-22
170	France	Femme	39	2	69	73				36	76		0	cadre et profession intellectuelle sup&#233rieure	6	77	mari&#233	1	2	95	74	79	78			75			80	0	23	50		165	57	57	21	-23
171	France	Femme	30	2	55	52	0	0	54	26	54	72	1	artisan, commer&#231ant ou chef d'entreprise	2	63	concubinage	1	0	38	72	83	84	61	42	46	62	100	40	0	49	45	50	169	75	72	-34	-49	-5	60	-16	19
172	France	Femme	41	2	20	22	2	18	0	0	13	16	14	profession interm&#233diaire	4	62	mari&#233	1	0	100	0	0	0	0	100	100	1	50		0	0	26	24	163	57	57	100	0	2		99	-100
174	France	Femme	53	2	20	73	18	17	17	13	38	23	22	artisan, commer&#231ant ou chef d'entreprise	4	86	mari&#233	1	2	78	79	85	83	20	31	79	65	19	40	14	18	21	20	169	53	53	-1	-4	1	-21	14	-11
175	France	Femme	29	2	22	50	0	0	75	100	15	19	0	ouvrier	4	77	mari&#233	1	1	100	22	20	74	82	13	25	66	100	0	0	57	65	67	156	50	50	78	-57	-2	100	-41	69
176	France	Femme	52	2	61	63	50	29	23	73	26	30	12	cadre et profession intellectuelle sup&#233rieure	5	69	mari&#233	1	2	72	88	73	78	50	60	64	28	27	30	7	47	11	14	173	68	69	-16	-40	-3	-3	36	-10
177	France	Femme	45	2	82	81	68	71			69	67		cadre et profession intellectuelle sup&#233rieure	4	80	mari&#233	1	2	44	54	67	71		59	68	38	37	60	26	23	38	64	169	65	65	-10	3	-26	-23	30
178	France	Homme	55	2	62	57				59	47		62	cadre et profession intellectuelle sup&#233rieure	5	67	mari&#233	1	2	71	37	41	61	67	32	39				35	33			183	75	78	34	2				35
179	France	Femme	35	2	96	100	100		100	100	99	100		profession interm&#233diaire	1		autre		2	100	1	99	2	1	99	100	0	1	100	70	0	0	100	167	57	60	99	70	-100	-99	100	-98
181	France	Femme	45	2	62	70	68	89	50	21	68	50	13	artisan, commer&#231ant ou chef d'entreprise	4	100	concubinage	1	3	87	78	92	79			43	18	74	73	8	10	65	65	165	53	52	9	-2	0	1	25
182	France	Homme	54			0	0	0	100	91	0		3	artisan, commer&#231ant ou chef d'entreprise	2	97	mari&#233	1	2	93	96	95	99	97	100			100	100	0	0			186	103	103	-3	0		0		-3
184	France	Femme	61	2	71	80	1	100	14	34	11	50	50	profession interm&#233diaire	2	94	c&#233libataire	2	2	100	50	50	50	24	77	50	50	50	50	14	70	0	1	160	70	72	50	-56	-1	0	0	-53
185	France	Femme	57	2	85	85	86	50	50	36	84	71	50	profession interm&#233diaire	2	97	mari&#233	1	2	71	50	50	50	25	85	50	21	50	50	12	28	50	100	160	60	60	21	-16	-50	0	29	-60
186	France	Homme	48	2	97	94	76	96	71	50	98	8	84	artisan, commer&#231ant ou chef d'entreprise	5	100	mari&#233	1	3	98	39	43	41	75	79	35	22	50	35	38	47	72	96	175	80	78	59	-9	-24	15	13	-4
187	France	Femme	31	2	0	72	31	85	37	50	50		62	cadre et profession intellectuelle sup&#233rieure	6	91	concubinage	1	0	86	88	84	90	60	60		65	66	37	29	27	0	0	164	60	61	-2	2	0	29		0
188	France	Femme	28	2	64	75	32	7	85	70	67	36	7	profession interm&#233diaire	4	66	PACS&#233	1	2	73	61	30	29	36	50	83	50	36	34	18	31	27	36	165	62	62	12	-13	-9	2	33	-14
189	France	Femme	41	2	42	66	67	74	77	24	71	29	29	profession interm&#233diaire	4	95	c&#233libataire	2	2	100	0	16	15	7	65	87	93	15	26	8	63	27	65	158	86	86	100	-55	-38	-11	-6	-58
191	France	Homme	47	2	80	81	71	84	74	17	88	17	72	cadre et profession intellectuelle sup&#233rieure	5	100	mari&#233	1	3	78	22	24	20	50	73	50	18	25	24	18	32	25	72	180	80	81	56	-14	-47	1	32	-23
192	France	Femme	35	2	67	65	66	64	33	100	37			profession interm&#233diaire	4	77	concubinage	1	0	88	57	72	57	72	30	40	60	69	33	7	38	60	61	160	56	57	31	-31	-1	36	-20	42
194	France	Femme	20	2	14	70	29	76	50	80	53	85	18	&#233l&#232ve ou &#233tudiant	4	75	c&#233libataire	2	0	81	83	47	65	50	50	43	62							175			-2				-19	0
196	France	Femme	36	2	25	22	75	22	65	71	51	63	31	profession interm&#233diaire	2	100	mari&#233	1	2	80	58	63	68	50	50	50	50	50	50	54	69	50	50	167	80	80	22	-15	0	0	0	0
197	France	Femme	41	2	30	5	5	32	5	5	7	27	3	profession interm&#233diaire	4	23	c&#233libataire	2	0	95	28	22	20	4	27	93	37	50	50	3	73	2	2	160	48	48	67	-70	0	0	56	-23
199	France	Femme	55	2	66	70	28	67	3	50	50	50	5	cadre et profession intellectuelle sup&#233rieure	6	73	mari&#233	1	2	70	33	35	36	50	50	74	39	50	50	21	69	10	52	178	80	78	37	-48	-42	0	35	0
201	France	Femme	47	2	100	50	1	55	100	92	50	50	50	cadre et profession intellectuelle sup&#233rieure	5	50	mari&#233	1	2	100	17	32	34	12	50	99	50	100	100	0	35	50	50	165	60	60	83	-35	0	0	49	-38
202	France	Homme	37	1	54	74	80	100	80	0	75	0	100	profession interm&#233diaire	4	81	concubinage	1	2	74	5	0	0	81	79	17	14	26	24		72	0	0	175	83	83	69		0	2	3	2
203	France	Femme	47	2	81	91	78	78	73	44	59	41	59	profession interm&#233diaire	4	79	mari&#233	1	2	100	59	67	70	61	86	75	69	46	75	2	11	65	79	165	58	58	41	-9	-14	-29	6	-25
204	France	Femme	38	2	25	36	0	100	0	77	36	62	9	artisan, commer&#231ant ou chef d'entreprise	4	81				100	72	72	72	62	41	83	74	76	32	0	0	0	0	170	63	64	28	0	0	44	9	21
205	France	Homme	52	1	50	26	0	21	0	2	24	6	24	cadre et profession intellectuelle sup&#233rieure	5	50	mari&#233	1	2	100	76	80	83	6	92	2	22	0	0	0	9	24	23	180	90	90	24	-9	1	0	-20	-86
206	France	Homme	64	2	97	75	12	1	4	2	50	2	2	retrait&#233	2	92	mari&#233	1	2	50	50	50	50	5	4	50	50	3	2	1	77	23	73	163	70	70	0	-76	-50	1	0	1
207	France	Femme	33	2	72	63	60	78	77	65	67	86	75	cadre et profession intellectuelle sup&#233rieure	5	88	mari&#233	1	2	80	62	99	98	10	78	90	36	34	73	0	3	2	22	164	70	71	18	-3	-20	-39	54	-68
208	France	Homme	55	2	0	50	56	70	50	34	50	34	0	cadre et profession intellectuelle sup&#233rieure	5	74	mari&#233	1	2	73	77	75	75	50	50	50	34	50	50	50				182	105	105	-4			0	16	0
209	France	Femme	55	2	80	58	50	82	8	23	11	39	3	profession interm&#233diaire	2	99	mari&#233	1	2	65	50	50	50	55	60	50	44	64	50	13	53	50	50	158	53	53	15	-40	0	14	6	-5
210	France	Femme	45	2			3	5					5	artisan, commer&#231ant ou chef d'entreprise	5	98	mari&#233	1	5	99	97	98	97	6	13	98	93			5	8			170	65	65	2	-3			5	-7
211	France	Femme	50	2	100	69	20	68	17	100	65	83	100	cadre et profession intellectuelle sup&#233rieure	5	74	mari&#233	1	3	100	100	100	100	13	74	79	63	77	79	0	0	87	87	157	60	60	0	0	0	-2	16	-61
213	France	Femme	60	2	16	50	50		5	50	16	49		retrait&#233	2	100	mari&#233	1	2	100	19	10	12	8	50	73	22	50	50	2	75	50	50				81	-73	0	0	51	-42
214	France	Femme	70	2	50	50	13		7	14	50	10		retrait&#233	6	70	mari&#233	1	2	71	22	21	25	54	100	50	31	24	64	52	50	24	68	165	54	55	49	2	-44	-40	19	-46
216	France	Femme	47	1	67	33	63	80	61	38	59	41	23	cadre et profession intellectuelle sup&#233rieure	5	36	autre		2	59	39	77	71	62	70	41	34	59	64	12	10	58	72	167	60	60	20	2	-14	-5	7	-8
219	France	Femme	47	2	63	71	23				63	75	14	cadre et profession intellectuelle sup&#233rieure	4	100	mari&#233	1	3	80	92	93	99	50		37	67	61	36	36	37	60	60	176	63	61	-12	-1	0	25	-30
221	France	Femme	57	2	50	50	20	2	50	0	20	0	0	cadre et profession intellectuelle sup&#233rieure	5	70	mari&#233	1		72	73	73	74	1	7	100	92	3	0	0	1	0	3	162	59	59	-1	-1	-3	3	8	-6
222	France	Femme	30	2	70		0		31		6	82		&#233l&#232ve ou &#233tudiant	2		c&#233libataire	2	1	100	100	99	70	98	2	55	57	91	16	0	1	0	0	156	48	46	0	-1	0	75	-2	96
224	France	Homme	39	1	79	100	20	28	29	28	27	28	20	ouvrier	2	81	c&#233libataire	2	0	97	0	56	25	5	64	100	58	91	17	10	97	5		170	65	68	97	-87		74	42	-59
226	France	Femme	48	1	24	22	13	19	50	35	50	50	29	profession interm&#233diaire	5	84	c&#233libataire	2	2	77	71	71	72	50	50	50	50	50	50	28	18	25	28	164	60	60	6	10	-3	0	0	0
230	France	Femme	67		64	76	50	50	26	87	68	50	14	cadre et profession intellectuelle sup&#233rieure	5	100	mari&#233	1	3	87	73	69	78	43	50	69	45	68	44	19	38	58	75	157	67	68	14	-19	-17	24	24	-7
231	France	Homme	87	2	50	50	50	50	50	99	2	50	50	retrait&#233	1	99	mari&#233	1	2	50	50	70	71	50	50	50	50	50	50	50	50	36	38	169	80	80	0	0	-2	0	0	0
233	France	Femme	31	2	71	73	71	3	0	99	80	72	0		4	77	concubinage	1	0	78	81	79	81	50	52	50	50	50	50	50	17	9	50	154	55	52	-3	33	-41	0	0	-2
235	France	Homme	44	2	67	67	55	83	18	42	61	44	37	profession interm&#233diaire	4	71	mari&#233	1	2	84	57	34	63	64	61	44	76	67	40	69	58	23	43	174	110	110	27	11	-20	27	-32	3
236	France	Homme	53	2	12	50	10	84	12	50	12	44	12	cadre et profession intellectuelle sup&#233rieure	6	90	mari&#233	1	4	83	22	28	26	23	72	83	50	29	50	3	50	50	50	178	73	74	61	-47	0	-21	33	-49
237	France	Homme	36	2	29	24	61	12	0	25	3	59	0	&#224 la recherche d'un emploi	2	21	concubinage	1	0	74	50	50	50	50	50	50	50	72	72	0	32	0	0	176	82	83	24	-32	0	0	0	0
239	France	Homme	37	2	100	100		100	82	23	78	22	81	ouvrier	2	100	mari&#233	1	2	100	22				77	73	41	24	71	6	83	51	80	172	68	68	78	-77	-29	-47	32
240	France	Homme	52	2	25	27	21	50	26	31	25	25	50	&#224 la recherche d'un emploi	4	82	autre		2	50	50	50	50	50	50	50	50	50	50	50	50	50	50	165	74	74	0	0	0	0	0	0
243	France	Homme	57	2	14	12	0	48	21	67	0	67	14	cadre et profession intellectuelle sup&#233rieure	5	95	mari&#233	1	4	89	32	63	26	32	80	79	61	19	34	0	21	0	10	181	83	85	57	-21	-10	-15	18	-48
247	France	Femme	57	2	100	84	10	13	4	71	77	49	50	retrait&#233	2	99	mari&#233	1	0	68	50	50	50	64	78	50	37	50	50	13	11	50	96	175	90	90	18	2	-46	0	13	-14
250	France	Homme	64	2	98	94	50	6	4	50	68	74		retrait&#233	2	93	mari&#233	1		70	50	50	50	50	71	60	33	50	62	33	62	50	78	167	76	79	20	-29	-28	-12	27	-21
253	France	Homme	69	2	37	70	80	53	72	60	68	77		retrait&#233	4	90	c&#233libataire	2	0	80	28	15	27	36	40	63	50	32	33	15	54	29	70	162	67	68	52	-39	-41	-1	13	-4
254	France	Homme	50	2	23	26	28	65	22	32	56	59	21	cadre et profession intellectuelle sup&#233rieure	6	72	mari&#233	1	3	68	66	70	66	61	70	61	33	63	0	63	50	22	15	184	84	84	2	13	7	63	28	-9
256	France	Homme	43	2	21	79	76	95	4	77	73	96	10	artisan, commer&#231ant ou chef d'entreprise	5	99	mari&#233	1	3	96	17	31	32	65	76	99	72	83	78	4	35	3	4	180	77	77	79	-31	-1	5	27	-11
258	France	Homme	28	1	32	46	30	68	20	68	50	61	33	cadre et profession intellectuelle sup&#233rieure	5	71	c&#233libataire	2	0	65	78	79	78	24	29	71	72	23	21	23	70	28	22	175	88	88	-13	-47	6	2	-1	-5
260	France	Femme	30	1	66	65	19	77	14	20	61	9	75	cadre et profession intellectuelle sup&#233rieure	5	82				100	0	5	2	0	0	91	11	5	11	10	94	49	61	163	58	58	100	-84	-12	-6	80	0
262	France	Femme	28	1	0	18	13	13	50	82	14	76	0	cadre et profession intellectuelle sup&#233rieure	6	38	mari&#233	1	0	100	100	100	100	0	0	100	100	50	50	0	0	0	0	171	58	58	0	0	0	0	0	0
265	France	Homme	57	1	25	10	1	21	65	68	21	78	29	cadre et profession intellectuelle sup&#233rieure	5	87	PACS&#233	1	3	65	91	85	97	35	50	68	32	21	66	21	10	50	50	182	83	83	-26	11	0	-45	36	-15
266	France	Femme	47	2	64	50	50	1	50	50	50	50	0	profession interm&#233diaire	4	100	mari&#233	1	2	85	83	83	91	76	20	90	63	45	73	1	50	0	2	166			2	-49	-2	-28	27	56
267	France	Femme	30	2	62	62	19	34	13	84	59	94	0	cadre et profession intellectuelle sup&#233rieure	6	76	c&#233libataire	2	0	97	75	76	75	46	27	82	79	84	53	2	9	9	20	172	60	58	22	-7	-11	31	3	19
269	France	Femme	58	1	50	35	100	65	50	30	49	65	13	cadre et profession intellectuelle sup&#233rieure	6	50	mari&#233	1	2	80	25	37	19	15	26	62	50	12	22	6	61	12	50	164	73	72	55	-55	-38	-10	12	-11
270	France	Femme	46	2	0	0	3		4	76	0	98	0	artisan, commer&#231ant ou chef d'entreprise	1	88	mari&#233	1	2	49	50	53	50	75	25	27	80	49	48	3	2	0	0	153	44	44	-1	1	0	1	-53	50
271	France	Femme	31	2		67	70		66	100	67	77	0	cadre et profession intellectuelle sup&#233rieure	5	72	mari&#233	1	0	50	74	69	71	38	63	64	50	65	37	15	16	20	64	172	57	58	-24	-1	-44	28	14	-25
272	France	Femme	48	1	70	33	32	28	22	26	19	48	21	cadre et profession intellectuelle sup&#233rieure	6	77	mari&#233	1	2	75	33	31	34	50	50	69	68	50	50	14	15	14	17	170	62	62	42	-1	-3	0	1	0
273	France	Femme	45	2	61	60	19	89	6	18	57	47	38	cadre et profession intellectuelle sup&#233rieure	5	90	PACS&#233	1	0	99	50	73	50	86	70	79	50	90	21	10	11	35	57	168	60	59	49	-1	-22	69	29	16
274	France	Femme	38	2	14	24	76	74	82	83	71	6	64	artisan, commer&#231ant ou chef d'entreprise	4	90	PACS&#233	1	0	100	50	69	77	11	63	73	6	84	17	6	86	0	4	164	61	59	50	-80	-4	67	67	-52
275	France	Femme	41	2				62	65	37		93	40	cadre et profession intellectuelle sup&#233rieure	5	77	mari&#233	1	2	47	68	69	73	62	63			64	65			12	11	170	65	65	-21		1	-1		-1
276	France	Femme	30	2	83	99	87	85		50	100	81	29	cadre et profession intellectuelle sup&#233rieure	6	97	c&#233libataire	2	0	100	8	63	9	26		100	84	92	34	0	80	73	74	169	75	76	92	-80	-1	58	16
278	France	Homme	64	2	50	50	68	58	0	0	0	0	0	retrait&#233	2	100	mari&#233	1	0	100	0	0	0	0	0	100	72	0	0	0	100	0	0	183	85	85	100	-100	0	0	28	0
279	France	Homme	30	2	37	50	50	23	26	25	11	29	66	profession interm&#233diaire	4	50	concubinage	1	0	81	36	26		30	71	64	31	37	58	14	80			168	64	64	45	-66		-21	33	-41
280	France	Femme	63	2	10	12	3		1	50	12	83		retrait&#233	2	81	mari&#233	1		83	66	50	50	2	1	89	89	0	1	8	16	8	12	162	57	57	17	-8	-4	-1	0	1
281	France	Homme	40	2	29	28	19	19	18	43	27	13	1	cadre et profession intellectuelle sup&#233rieure	5	71	mari&#233	1	5	65	69	71	72	22	24	28	30	30	30	23	19	23	23	173	74	74	-4	4	0	0	-2	-2
282	France	Femme	39	2	20	19	26	19	72	74	35	57	56	artisan, commer&#231ant ou chef d'entreprise	4	50	c&#233libataire	2	2	50	50	50	50	53	50	50	50	50	50	50	50	9	6	181	64	65	0	0	3	0	0	3
284	France	Femme	43	2	69	71	0	13	12	13	50	87	0	cadre et profession intellectuelle sup&#233rieure	5	100	mari&#233	1	3	100	86	86	86	27	50	86	50	21	21	0	0	84	85	169	62	62	14	0	-1	0	36	-23
286	France	Femme	42	2	72	76	79	0	54	32	52	100	2	artisan, commer&#231ant ou chef d'entreprise	5	74	mari&#233	1	2	100	75	76	78	23	24	79	65	1	25	18	35	50	50	165	52	52	25	-17	0	-24	14	-1
287	France	Homme	53	1	50	29	8	76	64	25	23	34	16	artisan, commer&#231ant ou chef d'entreprise	5	100	mari&#233	1	2	99	64	95	93	8	24	88	89	74	61	3	8	50	50	173	73	71	35	-5	0	13	-1	-16
288	France	Homme	52	1	0	0	0	11	50	50	1	50	23	cadre et profession intellectuelle sup&#233rieure	5	50	mari&#233	1	3	71	86	83	86		70					0	0	0	0	184	85	84	-15	0	0
289	France	Femme	33	2	30	8	0	0	0	63	30	87	1	&#224 la recherche d'un emploi	5	78	c&#233libataire	2	0	68	70	64	33	31	17	68	85	69	22	9	29	70	69	174	60	60	-2	-20	1	47	-17	14
290	France	Femme	55	2	26	92	100			15	21		0	artisan, commer&#231ant ou chef d'entreprise	2	76	mari&#233	1	3	100	39	39	36	64	26	73	77	67	32	19	21	13	19	164	92	92	61	-2	-6	35	-4	38
291	France	Femme	45	2	73	75	19	75	50	84	50	50	79	cadre et profession intellectuelle sup&#233rieure	6	22	mari&#233	1	0	85	87	87	83	84	30	73	40	80	39	27	29	29	50	170	61	61	-2	-2	-21	41	33	54
293	France	Homme	56	2	3	96	98	100	53	10	50	4	97	cadre et profession intellectuelle sup&#233rieure	5	50	autre		0	50	5	0	0	24	77	50	20	50	50	0	50	50	50	175	70	70	45	-50	0	0	30	-53
294	France	Femme	53	1	10	8	50	74	10	100	17	34	5	cadre et profession intellectuelle sup&#233rieure	4	100	veuf	3	3	100	77	10	50	68	24	50	50	90	35	3	66	33	34	174	64	66	23	-63	-1	55	0	44
295	France	Femme	36	2	63	62	6	54	27	82	52	50	5	profession interm&#233diaire	4	68	concubinage	1	0	73	38	50	69	50	38	73	64	50	50	14	38	59	58	153	50	50	35	-24	1	0	9	12
296	France	Femme	47	2	59	25	35	34	40	62	49	50	28	cadre et profession intellectuelle sup&#233rieure	6	74	c&#233libataire	2	0	71	66	67	69	26	28	74	62	63	39	18	37	17	17	159	71	70	5	-19	0	24	12	-2
297	France	Femme	53	2	65	65	20	50	74	50	26	77	64	profession interm&#233diaire	4	26	mari&#233	1	2	62	79	71	70	72	57	50		50	36	37	21			161	58	60	-17	16		14		15
298	France	Femme	58	2	17	17	19	20	20	25	23	20	13	profession interm&#233diaire	4	86	c&#233libataire	2	2	77	50	50	50	50	50	70	32	50	50	18	40	2	3	163	66	68	27	-22	-1	0	38	0
299	France	Femme	43	2	75	62	0	50	0	22	55	77	2	artisan, commer&#231ant ou chef d'entreprise	4	100	concubinage	1	0	50	27	29	67	50	50	65	38	50	50	28	58	23	55	164	56	56	23	-30	-32	0	27	0
300	France	Femme	28	2	81	89	25	96	76	55	85	59	60	cadre et profession intellectuelle sup&#233rieure	5	100	PACS&#233	1	0	93	100	100	100	29	68	84	73	65	37	20	69		70	166	66	64	-7	-49		28	11	-39
302	France	Homme	58	2	25	25	79	23	54	25	18	22	26	artisan, commer&#231ant ou chef d'entreprise	4	99	concubinage	1	1	93	65	82	50	26	50	65	36	50	50	16	48	1	1	183	92	92	28	-32	0	0	29	-24
303	France	Femme	40	2	24	60	0	50	23	74	30	26		cadre et profession intellectuelle sup&#233rieure	5	69	concubinage	1	2	100	73	67	70	75	67	82	71	19	18	0	0	21	22	169	76		27	0	-1	1	11	8
304	France	Femme	68	2	51	68	25	14	19	36	66	62	11	retrait&#233	6	89	autre		1	72	39	37	37	67	40	68	33	77	40	30	66	50	50	172	72	73	33	-36	0	37	35	27
305	France	Homme	52	2	78	30	30	50	69	68	36	50	50	artisan, commer&#231ant ou chef d'entreprise	4	73	mari&#233	1	3	50	50	50	50	50	36	36	24	69	23	29	62	0	69		82	80	0	-33	-69	46	12	14
306	France	Homme	51	1	86	76	50	72	70	23	71	50	50	artisan, commer&#231ant ou chef d'entreprise	5	90	mari&#233	1	2	66	42	50	50	50	63	71	42	65	79	25	25	59	67	178	87	85	24	0	-8	-14	29	-13
307	France	Femme	60	1	66	69	88	96	73		76	53	78	cadre et profession intellectuelle sup&#233rieure	2	100	mari&#233	1	1	100	100	100	99				33			10	9	0	73	166	72	73	0	1	-73
310	France	Femme	35	2	24	23	65	51	36	50	59	50	4	cadre et profession intellectuelle sup&#233rieure	4	18	concubinage	1	2	50	81	80	79	33	77	78	77	29	29	50	26	12	12	161	57	57	-31	24	0	0	1	-44
311	France	Femme	34	2	76	90	52	50	76	100	62	73	50	artisan, commer&#231ant ou chef d'entreprise	2	70	concubinage	1	2	100	0	12	2	58	77	90	82	32	72	93	85	27	66	174	81	82	100	8	-39	-40	8	-19
313	France	Femme	25	2	13	30	3	1	51	89	41	22	4	cadre et profession intellectuelle sup&#233rieure	5	73	c&#233libataire	2	0	82	98	30	49	70	40	78	75	82	24	3	91	21	15	175	64		-16	-88	6	58	3	30
315	France	Femme	53	2	53	63	59	64	16	15	65	86	10	artisan, commer&#231ant ou chef d'entreprise	4	100	mari&#233	1	2	100	0	90	50	99	66	100	34	50	88	85	100	7	38	163	57	58	100	-15	-31	-38	66	33
318	France	Femme	40	2	100	100	79	50	50	100	100	50	50	profession interm&#233diaire	6	88	mari&#233	1	1	100	50	50	50	50	50	50	20			0	21	0	50	166	63	62	50	-21	-50		30	0
319	France	Femme	46	2	15	22	10		29	71	9	50	12	cadre et profession intellectuelle sup&#233rieure	4	82	mari&#233	1	1	71	27	33	28	7	10	88	68	71	50	10	62	50	50	170	82	84	44	-52	0	21	20	-3
320	France	Femme	48	1	74	80	79	79	79	18	76	21	66	profession interm&#233diaire	4	100	mari&#233	1	3	52	33	50	50	35	69	50	0			31	84	53	77	166	59	58	19	-53	-24		50	-34
321	France	Femme	55	2	58	50	8	0	50	50	53	89	0	cadre et profession intellectuelle sup&#233rieure	4	95	mari&#233	1	1	97	96	98	94	50	50	50	50	54	54	25	0	75	89	165	55	54	1	25	-14	0	0	0
322	France	Femme	44	1	12	63	3	75	76	35	64	40	4	profession interm&#233diaire	4	84	c&#233libataire	2	0	84	50	78	50	50	70	50	50	34	65	15	1	50	50	163	75		34	14	0	-31	0	-20
324	France	Femme	36	1	18	13	11	13	15	75	13	50	28	ouvrier	2	66	c&#233libataire	2	0	50	50	50	50	23	71	78	75	22	23	21	19	12	13	139	90	90	0	2	-1	-1	3	-48
325	France	Femme	34	2	19	28	0	0	0	0	85	0	0	&#224 la recherche d'un emploi	2	0	mari&#233	1	3	95	96	96	97	0	0	100	100	0	0	0	0	0	0	176	82	82	-1	0	0	0	0	0
326	France	Femme	26		13	89	85	67	98	17	76	19	58	cadre et profession intellectuelle sup&#233rieure	6	97	c&#233libataire	2	0	96	17	22	18	62	82	40	18	69	69		56	4	1	170	68	68	79		3	0	22	-20
327	France	Femme	58	2	67	62	66	23	66	25	63	59	16	profession interm&#233diaire	4	72	mari&#233	1	2	87	59	59	69	50	79	70	47	51	70	8	36	23	69	163	61	63	28	-28	-46	-19	23	-29
328	France	Femme	23	2	50	20	19	16	1	50	35	61	0	&#233l&#232ve ou &#233tudiant	5	87	concubinage	1	0	100	3	22	19	0	3	100	83	100	68	2	82	87	87	174	64	64	97	-80	0	32	17	-3
332	France	Femme	40	2	77	76	75	96	50	25	75	69	51	artisan, commer&#231ant ou chef d'entreprise	4	100	mari&#233	1	2	50	69	79	71	50	63	50	33	50	34	20	2	50	72	162	58	59	-19	18	-22	16	17	-13
333	France	Femme	70	2	83	82	83			76	76	81		retrait&#233	4	83	veuf	3	2	67	54	9	57	14		71	21	7	6	20	71	50	82	164	75	76	13	-51	-32	1	50
334	France	Femme	18	2	39	60	68	52	37	50	71	16	50	&#233l&#232ve ou &#233tudiant	2	100	c&#233libataire	2	0	61	20	20	21	50	71	75	29	70	67	29	96	62	70	159	62	60	41	-67	-8	3	46	-21
335	France	Femme	52	2			99		66	93		79		cadre et profession intellectuelle sup&#233rieure	5	76	autre		2	100	0	0	0	24	78	79	28	37	74	7	94			168	68	70	100	-87		-37	51	-54
336	France	Femme	40	2	21	25	77	81	50	72	29	29	73	cadre et profession intellectuelle sup&#233rieure	5	97	mari&#233	1	1	65	45	50	52	22	78	85	23	23	84	26	27	50	50	167	69	69	20	-1	0	-61	62	-56
337	France	Femme	36	2	26	43	30	62	25	72	42	63	10	profession interm&#233diaire	4	64	c&#233libataire	2	1	68	44	44	43	27	36	80	71	28	38	15	37	23	30	160	55	55	24	-22	-7	-10	9	-9
338	France	Femme	47	2	71	68	37	17	50	25	65	28		artisan, commer&#231ant ou chef d'entreprise	4	79	autre		2	74	20	32	32	56	68	70	34		33	17	58	58	60	176	60	60	54	-41	-2		36	-12
341	France	Homme	51	1	50	58	80	18	69	4	41	50	21	cadre et profession intellectuelle sup&#233rieure	5	87	mari&#233	1	2	50	54	50	50	50	51	63	64	71	70	3	3	19	27	181	95	95	-4	0	-8	1	-1	-1
342	France	Femme	46	1	70	71	27	71	78	17	61	56	39	cadre et profession intellectuelle sup&#233rieure	5	93	PACS&#233	1	2	62	76	95	85	66	75	67	69	32	80	61	11	50	50	160	52	54	-14	50	0	-48	-2	-9
343	France	Femme	41	2	25	50	77	80	80	84	49	78	50	profession interm&#233diaire	4	82	concubinage	1	2	100	50	50	50	50	77	50	78	50	79	23	2	50	50	172	72	72	50	21	0	-29	-28	-27
344	France	Homme	46	2	27	27	26	26	27	78	19	66	24	cadre et profession intellectuelle sup&#233rieure	6	36	mari&#233	1	1	50	50	50	50	12	12	85	86	50	50	26	24	0	0	172	60	60	0	2	0	0	-1	0
345	France	Femme	64	2	68	66			70	50				profession interm&#233diaire	4	25	veuf	3	0	99	50	72	72				25	77		23	34			173	88	86	49	-11
348	France	Femme	36	2	68	31	34		71	33	34	71		profession interm&#233diaire	4	98	concubinage	1	0	97	23	21	23	83	61	100	86	16	17	4	41	24	25	153	49	51	74	-37	-1	-1	14	22
349	France	Femme	24	1	67	69	50	91	50	30	70	50	26	profession interm&#233diaire	4	100	concubinage	1	0	56	8	2	8	52	82	82	2	26	50	14	15	14	13	160	69	69	48	-1	1	-24	80	-30
350	France	Homme	62	2	25	21	18	50	14	14	12	50	17	retrait&#233	2	73	mari&#233	1	2	86	50	29	26	30	74	68	59	27	25	17	65	23	23	175	108	108	36	-48	0	2	9	-44
351	France	Femme	41	2	50	50	50	50	50	27	64	50	50	cadre et profession intellectuelle sup&#233rieure	5	73	mari&#233	1	1	80	78	79	82	13	38	87	85	13	16	2	16	50	50	175	66	67	2	-14	0	-3	2	-25
352	France	Femme	45	2	71	87	50	22	76	21	75	73	5	profession interm&#233diaire	2	85	c&#233libataire	2	0	81	25	34	78	75	33	73	50	86	29	33	31	50	50	160	93	91	56	2	0	57	23	42
353	France	Femme	34	2	100	98	98	98	99	2	98	98	75	profession interm&#233diaire	4		concubinage	1	0	100	2	1	2	2	99	99	3	4	98	2	100	3	98	151	55	50	98	-98	-95	-94	96	-97
354	France	Femme	25	1	74	73		100	100	5	50	14	100	profession interm&#233diaire	4		c&#233libataire	2	0	75	68	68	68	70	82		44	81	92	39	25			167	58	58	7	14		-11		-12
356	France	Femme	49	2	50	74	50	100	50	50	50	50	80	cadre et profession intellectuelle sup&#233rieure	5	100	mari&#233	1	2	87	64	90	74	15	50	79	50	81	22	2	2	0	19	170	85	86	23	0	-19	59	29	-35
357	France	Femme	36	1	49	92	16	90	54	100	77	33	16	profession interm&#233diaire	4	100	mari&#233	1	3	100	83	82	81	21	81	86	22	13	85	7	6	0	0	170	60	60	17	1	0	-72	64	-60
358	France	Homme	27	2	37	59	60	60	61	21	55	18	41	cadre et profession intellectuelle sup&#233rieure	6	79	c&#233libataire	2	0	72	19	21	24	50	66	50	32	44	72	13	64	16	17	183	70	70	53	-51	-1	-28	18	-16
359	France	Femme	45	2	75	69	29	86	77	24		41	82	cadre et profession intellectuelle sup&#233rieure	4	90	mari&#233	1	2	61	65	62	62		57				58	19	9	13	12	170	55	57	-4	10	1
360	France	Femme	30	2	50	70		0		63				profession interm&#233diaire	4	72	concubinage	1	0	75	66	64	83											154	69	69	9
361	France	Femme	39	2	72	63		100				17	9	profession interm&#233diaire	2	100	concubinage	1	0	86	25	22	18	30	62					24	68	9	8	175	68	67	61	-44	1			-32
362	France	Femme	42	2	46	0	100	0	3	3	3	100	50	cadre et profession intellectuelle sup&#233rieure	6	70	veuf	3	3	75	32	26	24	22	21	74	73	51	50	0	2	50	50	160	51	52	43	-2	0	1	1	1
363	France	Femme	26	2	74	74	75	100	35	30	86		50	profession interm&#233diaire	4	77	PACS&#233	1	0	57	16	16	32	15	34	86	17	78	18	21	80	0	3	166	65	65	41	-59	-3	60	69	-19
364	France	Femme	41	2	10	24		72	81	27	7				4	82	PACS&#233	1	2	100	100	100	100	79	16			81	64	17	0	77	79	169	70	70	0	17	-2	17		63
368	France	Femme	49	1	21	55	20	20	57	14	40	50	13	cadre et profession intellectuelle sup&#233rieure	6	66	mari&#233	1	2	50	50	50	50	50	66	50	38	50	39	50	39	20	20	158	56	56	0	11	0	11	12	-16
369	France	Femme	69	2	55	27	31	0	15	50	24	70	45	retrait&#233	2		veuf	3		100	37	42	44	50	50	100	40	25	57	0	50	15	19	156	59	59	63	-50	-4	-32	60	0
370	France	Homme	45	2	77	81	31	33	9	11	71	72	76	profession interm&#233diaire	4	83	PACS&#233	1	2	100	77	85	74	56	55	50	50	66	38	29	60	0	22	170	75	76	23	-31	-22	28	0	1
371	France	Homme	29	2	16	9	8	79	50	24	16	33	24	cadre et profession intellectuelle sup&#233rieure	6	16	PACS&#233	1	0	50	26	24	69	19	21	85	62	69	29	23	23	12	9	181	82	81	24	0	3	40	23	-2
372	France	Homme	56	2	7	12	9	7	14	13	13	14	11	cadre et profession intellectuelle sup&#233rieure	5	91	concubinage	1	3	70	73	74	77	22	20	88	5	83	16	9	10	16	14	180	95	95	-3	-1	2	67	83	2
373	France	Homme	52	2	23	37	59	66	84	26	15	50	69	artisan, commer&#231ant ou chef d'entreprise	4	87	mari&#233	1	1	78	50	50	50	34	50	75	29	34	58	50	66	26	25	164	77	77	28	-16	1	-24	46	-16
374	France	Femme	39	2	89	88	14	49			27	45		profession interm&#233diaire	4	88	PACS&#233	1	2	50	50	50	50	50	50	88	14	50	50	10	55	50	50	167	65	65	0	-45	0	0	74	0
376	France	Homme	62	1	66	65	50	71	50	71	66	65	50	cadre et profession intellectuelle sup&#233rieure	6	92	mari&#233	1	2	50	37	61	39	50	54	63	45	50	64	50	37	50	64	176	85	85	13	13	-14	-14	18	-4
378	France	Homme	23	2	0	64	73	72	74	23	62	71	0	cadre et profession intellectuelle sup&#233rieure	4	100	c&#233libataire	2	0	81	84	87	86	18	71	75	74	73	76	1	37	0	14	195	75	76	-3	-36	-14	-3	1	-53
379	France	Homme	44	2	62	67	41	61	60	8	72	29		cadre et profession intellectuelle sup&#233rieure	4	100	concubinage	1	1	70	50	50	62	55	59	67	33	68	58	61	69	55	67	176	85	86	20	-8	-12	10	34	-4
380	France	Femme	26	2	65	75	34	71	83	23	70	50	67	cadre et profession intellectuelle sup&#233rieure	5	81	concubinage	1	0	95	79	75	80	58	39	66	33	66	37	35	65	53	50	171	60	60	16	-30	3	29	33	19
381	France	Homme	63	1	22	19	17	20		6	3	8	7	cadre et profession intellectuelle sup&#233rieure	6	95	mari&#233	1	3	100	23	33	26	7	19	98	86	26	28	6	39	2	13	181	79	79	77	-33	-11	-2	12	-12
382	France	Femme	57	2	75	67	14	74	71	15	52	54	24	agriculteur, exploitant	2	98	mari&#233	1		90	37	51	53	23	66	72	32	28	48	10	45	50	68	157	64	64	53	-35	-18	-20	40	-43
384	France	Femme	27	2	0	0	0	1	0	100	0	100	0	cadre et profession intellectuelle sup&#233rieure	5	81	PACS&#233	1	0	98	19	26	24	86	10	13	79	86	12	14	13	10	9	160	110	104	79	1	1	74	-66	76
385	France	Femme	57	1	50	50	50	50	66	79	50	69	75	agriculteur, exploitant	4	91	autre		3	54	26	20	19	50	50	50	66	50	33	33	18	50	67	157	62	64	28	15	-17	17	-16	0
387	France	Femme	20	2	85	85	86	100	55	100	83	77	79	artisan, commer&#231ant ou chef d'entreprise	2	93	c&#233libataire	2	0	100	77	30	78	50	100	62	64	31	29	70	100	86	100	158	54	52	23	-30	-14	2	-2	-50
389	France	Femme	49	2	74	67	17	40	41	65	73	50	13	cadre et profession intellectuelle sup&#233rieure	5	77	mari&#233	1	2	81	64	54	61	58	78	64	39	37	37	18	31	31	50	157	62	61	17	-13	-19	0	25	-20
390	France	Homme	38	2	73	58	68	22	64	33	50	43	13	cadre et profession intellectuelle sup&#233rieure	5	82	mari&#233	1	0	79	72	77	81	56	66	58	50	50	55	28	39	50	50	178	72	73	7	-11	0	-5	8	-10
391	France	Femme	61	2	84	72	53		65	67	68	72	30	retrait&#233	5	63	mari&#233	1	2	85	31	38	40	25	76	69	30	74	33	12	66	28	70	164	52	52	54	-54	-42	41	39	-51
392	France	Femme	32	2	61	65	71			36	65		30	cadre et profession intellectuelle sup&#233rieure	5	97	mari&#233	1	1	90	15	65		10	73	84	29	82		12	18	15	78	157	52	52	75	-6	-63		55	-63
394	France	Femme	43	2	85	100	25	4	78	35	67	67	3	artisan, commer&#231ant ou chef d'entreprise	5	61	c&#233libataire	2	0	96	38	62	81	80	59		59	69	35	19	33			158	59	56	58	-14		34		21
395	France	Femme	49	1	76	74	17	82	82	17	73	23	79	cadre et profession intellectuelle sup&#233rieure	6	74	mari&#233	1	2	98	2	16	13	79	93	50	17	77	79	10	81	50	72	158	53	52	96	-71	-22	-2	33	-14
396	France	Femme	35		3	0	0	0	56	97	0	100	0	profession interm&#233diaire	5	40	c&#233libataire	2	0	100	100	100	73					0	0	0		0	0	162	70	70	0		0	0
397	France	Femme	26	2	98	97	97	69	72	50	97	50	0	profession interm&#233diaire	5	97	c&#233libataire	2	0	82	70	72	70	22	41	87	70	32	38	7	27	29	71	170	62	64	12	-20	-42	-6	17	-19
398	France	Femme	68	2	50	100	77	1	50	50	50	50	0	retrait&#233	2	100	mari&#233	1	2	100	50	50	50	50	50	50	50	2	50	0	50	50	50	156	92	92	50	-50	0	-48	0	0
400	France	Femme	41	2	2	1	2	70	2	98	2	98	2	artisan, commer&#231ant ou chef d'entreprise	6	73	c&#233libataire	2	0	97	75	63	60	8	7	99	98	98	98	1	1	0	1	172	59	56	22	0	-1	0	1	1
402	France	Femme	43	2	70	71	0	69	14	82	78	34	87	cadre et profession intellectuelle sup&#233rieure	6	83	mari&#233	1	2	100	16	46	24	73	17	27	13	75	24	0	40	0	22	167	58	59	84	-40	-22	51	14	56
404	France	Femme	37	2		89			50	77	100		7	cadre et profession intellectuelle sup&#233rieure	5	74	PACS&#233	1	1	92	37	88	88	11	72	95	27			16	14	54	64	165	66	67	55	2	-10		68	-61
405	France	Homme	52	1	89	76	71	100	87	85	86	66	98	artisan, commer&#231ant ou chef d'entreprise	2	100	mari&#233	1	4	59	71	83	82	68	81	29	18	67	38	31	18	15	16	181	134	131	-12	13	-1	29	11	-13
406	France	Femme	49	2	99	97	3	2	2	50	50	50	2	artisan, commer&#231ant ou chef d'entreprise	2	99	concubinage	1		50	51	50	50	50	97	98	50	4	3	3	3	2	99	165	95	87	-1	0	-97	1	48	-47
407	France	Femme	59	2	88	50	50	50	50	50	80	80	50	profession interm&#233diaire	4	97	c&#233libataire	2	0	69	80	50	69	60	67	50	50	73	76	50	50	50	53	167	62	60	-11	0	-3	-3	0	-7
408	France	Femme	24	2	82	82	32	11	83	13	66	86	14	cadre et profession intellectuelle sup&#233rieure	5	84	c&#233libataire	2	0	100	59	82	69	28	42	100	60	38	55	0	0	64	79	162	58	58	41	0	-15	-17	40	-14
409	France	Femme	37	2	63	74	100	29	77	73			19	cadre et profession intellectuelle sup&#233rieure	6	100	mari&#233	1	2	84	11		14	18		86	31	85		17	2	73		160	90	90	73	15			55
410	France	Homme	24	2	67	53	18	67	59	36	71	70	61	&#233l&#232ve ou &#233tudiant	6	84	c&#233libataire	2	0	70	69	67	70	70	72	56	54			16	31			182	60	60	1	-15			2	-2
411	France	Femme	53	1	100	98	54	100	75	100	86	82	82	profession interm&#233diaire	2	100	mari&#233	1	0	100	0	0	4	13	79	77	18	20	50	21	18			157	70	70	100	3		-30	59	-66
412	France	Femme	28	2	79	78	26	84	17	50	72	50	50	profession interm&#233diaire	4	82	concubinage	1	1	50	50	50	50	50	74	50	34	50	50	22	24	49	50	167	59	59	0	-2	-1	0	16	-24
413	France	Homme	64	2	71	34	35		34	62	32	64		retrait&#233	4	91	PACS&#233	1	2	65	66	70	71	33	33	64	69	32	34	30	30	59	68	181	99	97	-1	0	-9	-2	-5	0
415	France	Femme	50	1	13	72	0	72	70	55	56	30	67	cadre et profession intellectuelle sup&#233rieure	6	50	concubinage	1	2	85	88	78	78	50	65	75	83	50	34	9	78	50	50	170	70	70	-3	-69	0	16	-8	-15
417	France	Femme	32	2	19	21	25	75	50	50	24	61	50	cadre et profession intellectuelle sup&#233rieure	6	83	c&#233libataire	2	0	71	28	50	50	23	23	76	26	50	29	16	65	3	2	170	58	57	43	-49	1	21	50	0
420	France	Homme	57	1	38	60	25	75	58	61	42	66		cadre et profession intellectuelle sup&#233rieure	6	72	mari&#233	1	2	76	93	86	87	15	50	57	43	50	50	10	22	50	59	170	68	70	-17	-12	-9	0	14	-35
423	France	Homme	57	1			0						1	cadre et profession intellectuelle sup&#233rieure	6		concubinage	1	2	100	0	50	50	50	72	75	26	50	50	0	100	50	75	178	62	62	100	-100	-25	0	49	-22
424	France	Femme	38	2	69	83	68	50	66	63	68	37	14	cadre et profession intellectuelle sup&#233rieure	5	97	mari&#233	1	3	100	99	97	99	20	73	79	27	26		0	0	13		168	68	68	1	0			52	-53
425	France	Femme	40	2	2	4	3	3	2	19	6	79	4	profession interm&#233diaire	4	30	c&#233libataire	2	0	89	88	91	90	31		85	85	72	50	17	40	4	5	162	50	51	1	-23	-1	22	0
426	France	Femme	29	1	67	32	10	58	50	55	90	100	51	ouvrier	4	25	c&#233libataire	2	0	82	49	43	47	61	44	50	53	85	25	73	67	49	66	154	58		33	6	-17	60	-3	17
428	France	Femme	67	2	100	66	67	100	99	97	100	78	100	retrait&#233	2	100	mari&#233	1	3	100	16	17	0	25	84	84	0	26	25	0	78	62	98	170	82	83	84	-78	-36	1	84	-59
429	France	Femme	52	2	25	53	4	100	81	50	30	50	31	profession interm&#233diaire	4	100	c&#233libataire	2	2	100	27	40	38	12	17	79	50	50	25	14	50	0	1	174	53	52	73	-36	-1	25	29	-5
430	France	Homme	52	2	0	0	1	1	0	100	1		0	cadre et profession intellectuelle sup&#233rieure	5	76	mari&#233	1	0	79	80	82	83			73						1	0	183	76	76	-1		1
431	France	Femme	46	2	70		21	24	65	69	61	77	66	cadre et profession intellectuelle sup&#233rieure	5	72	mari&#233	1	2	68	93	95	82	35		71	75			26	7			167	56	57	-25	19			-4
434	France	Femme	31	1	50	44	0	96	50	29	29	31	96	cadre et profession intellectuelle sup&#233rieure	6	5	PACS&#233	1	0	97	97	98	96	92	100	4	2	50	97	15	1	18	67	165	55	55	0	14	-49	-47	2	-8
436	France	Femme	28		76	71	61	61	71	39	68	37	75	profession interm&#233diaire	5	0	c&#233libataire	2	0	89	15	39	39	81	53	40	54	70	31	0	45	18	23	157	48	48	74	-45	-5	39	-14	28
441	France	Femme	39	2	27	69	69	60	36	61	66	26	50	cadre et profession intellectuelle sup&#233rieure	5	79	concubinage	1	0	79	31	19	22	50	49	50	23	50	50	20	68	31	59	168	69	70	48	-48	-28	0	27	1
448	France	Femme	36	2	50	65	50	100	62	77	70	60	50	profession interm&#233diaire	4	50	mari&#233	1	3	71	63	43	44	43	50	62	57	70	40	0	37	60	73	168	64	65	8	-37	-13	30	5	-7
450	France	Femme	29	2	77	76	57	82	85	32	63	64	36	&#233l&#232ve ou &#233tudiant	5	59	c&#233libataire	2	0	77	61	57	59	34	41	68	50	73	23	15	65	23	40	163	53	53	16	-50	-17	50	18	-7
451	France	Femme	24	1	100	100	1	77	0	0	76	76	0	profession interm&#233diaire	4	71	PACS&#233	1	0	100	50	0	71	0	71	100		0	78	0	100	0	76	170	64	64	50	-100	-76	-78		-71
456	France	Homme	40	2	74	77	50	50	71	93	76	22	85	artisan, commer&#231ant ou chef d'entreprise	6	100	c&#233libataire	2	0	76	90	92	90	50	52	42	15	65	34	14	14	62	62	176	58	58	-14	0	0	31	27	-2
457	France	Homme	26	2	76	77	79	100	0	0	81	0	0	profession interm&#233diaire	4	80	c&#233libataire	2	0	100	63	65	68	0	0	100	24	0	0	0	75	0	72	190	106	106	37	-75	-72	0	76	0
458	France	Femme	40	2	79	100	81	86	86	97	85	69	50	cadre et profession intellectuelle sup&#233rieure	4	84	mari&#233	1	3	85	84	85	84	48	76	74	50	78	64	8	7	22	60	163	55	56	1	1	-38	14	24	-28
459	France	Homme	68	2	68	50	4		50	95	50	74	1	retrait&#233	2	79	mari&#233	1		96	74	76	77	50	50	50	50	50	50	15	14	3	1	172	72	72	22	1	2	0	0	0
460	France	Femme	25	2	78	97	100		70	0	100	50		artisan, commer&#231ant ou chef d'entreprise	2	98	PACS&#233	1	1	77	78	77	72	33	82	86	75	31	68	28	23	39	98	176	61	58	-1	5	-59	-37	11	-49
461	France	Femme	18	2	31	45	16	50	76	62	19	32	59	&#233l&#232ve ou &#233tudiant	2	86	c&#233libataire	2	0	49	14	17	56	50	50	82	42	50	50	14	81	0	11	170	72	73	35	-67	-11	0	40	0
462	France	Femme	36	1				74	74	17				profession interm&#233diaire	4	83	c&#233libataire	2	0	84	23	28	29	32	70	74	73	77	82	22	85	20	61	170	68	65	61	-63	-41	-5	1	-38
463	France	Femme	32	2	0	0	5	23	0	100	0	100	0	cadre et profession intellectuelle sup&#233rieure	5	7	c&#233libataire	2	0	86	75	76	83	71	16	47	97	83	3	0	0	0	0	156	50	49	11	0	0	80	-50	55
464	France	Homme	52	2	35	75	81	82	74	6	81	88	75	cadre et profession intellectuelle sup&#233rieure	5	96	mari&#233	1	2	96	36	35	34	28	71	81	35	89	81	3	33	50	69	172	82	83	60	-30	-19	8	46	-43
465	France	Homme	26	2	74	73	41	65	66	2	50	31	50	cadre et profession intellectuelle sup&#233rieure	5	83	mari&#233	1	1	96	100	85	88	2	74	76	23	50	50	0	0	25	67	184	75	75	-4	0	-42	0	53	-72
466	France	Femme	39	2				63	73	24	35	50	73	cadre et profession intellectuelle sup&#233rieure	6	33	PACS&#233	1	2	68	70	70	76	35	36	68		66		28	16	29	28	172	63	63	-2	12	1			-1
467	France	Femme	50	1	73	79	81	99	84	72	65	51	50	cadre et profession intellectuelle sup&#233rieure	6	75	c&#233libataire	2	0	83	77	63	81	78	62	76	65	62	63	55	71	33	63	166	68	69	6	-16	-30	-1	11	16
468	France	Femme	44	2	26	50	96	95	100	25	50	13	79	profession interm&#233diaire	4	81	c&#233libataire	2	3	95	61	10	16	94	94	26	4	90	91	90	94	15	16	162	52	52	34	-4	-1	-1	22	0
470	France	Femme	62	2	59	70		67	74	80	51	82	30	cadre et profession intellectuelle sup&#233rieure	6	89	mari&#233	1	3	71	32	36	43	74	41	59	36	69	45	24	17			158	58	58	39	7		24	23	33
471	France	Femme	35	1	50	25	18	50	72	81	19	50	16	profession interm&#233diaire	4	75	c&#233libataire	2	0	50	22	19	18	50	50	50	52	50	50	55	50	11	12	164	80	80	28	5	-1	0	-2	0
473	France	Homme	48	1	0	0	0	0	0	100	0	50	0	ouvrier	2	100	c&#233libataire	2	0	100	0	0	0	0	0	100	50	0	3	0	50	0	0	178	75	75	100	-50	0	-3	50	0
474	France	Femme	33	1	0	2	4	34	89	58	4	47	65	ouvrier	4	0	concubinage	1	0	63	19	50	50	50	99	50	50	40	38	50	50	50	50	160	73	73	44	0	0	2	0	-49
475	France	Femme	31	1	17	79	65	77	0	100	55	70	0	profession interm&#233diaire	4	93	mari&#233	1	1	98	95	99	94	35	60	61	50	30	33	21	18	23	21	167	55	56	3	3	2	-3	11	-25
476	France	Femme	28	2	16	72	72	1	1	37	69	24	2	&#224 la recherche d'un emploi	4	100	concubinage	1	0	99	70	70	69	61	83	63	27	73	31	29	85	32	63	165	67	69	29	-56	-31	42	36	-22
478	France	Femme	27	2	66	52	50	50	50	22	59	35	55	profession interm&#233diaire	5	61	mari&#233	1	0	68	50	0	86	50	56	86	42	50	63	50	61	50	63	160	60	60	18	-11	-13	-13	44	-6
481	France	Homme	34	2	79	31	75	85	82	23	83	16	29	cadre et profession intellectuelle sup&#233rieure	6	89	c&#233libataire	2	0	79	100	75	85	34	68	61	29	39	41	69	85	75	90	180	75	80	-21	-16	-15	-2	32	-34
484	France	Femme	23	1	34	85	21	84	68	57			69	profession interm&#233diaire	4	88	c&#233libataire	2	0	70	32	80	63					73						161	42	42	38
485	France	Femme	32	1	78	97	73	97	98	2	78	50	50	ouvrier	4	67	concubinage	1	0	99	2	2	1	1	68	89	11	3	50	2	50	48	73	161	99	102	97	-48	-25	-47	78	-67
486	France	Femme	30	2	61	73	71	73	62	35	78	15	85	profession interm&#233diaire	5	57	concubinage	1	0	83	38	41	37	64	86	85	37	61	44	19	67	66	67	160	54	54	45	-48	-1	17	48	-22
488	France	Femme	59	2	16	8	2	0	2	68	48	81	3	profession interm&#233diaire	2	72	mari&#233	1	0	92	77	78	71	18	37	83	63	23	24	2	7	2	9	167	74	74	15	-5	-7	-1	20	-19
489	France	Homme	44	2	62	32	67	75	72	34	50	42	63	cadre et profession intellectuelle sup&#233rieure	5	70	mari&#233	1	2	79	77	78	71	28	65	50	50	42	63	33	36	28	34	185	92	93	2	-3	-6	-21	0	-37
491	France	Femme	28	2	50	50	23	23		74	25	73	0	cadre et profession intellectuelle sup&#233rieure	5	73	PACS&#233	1	0	74	67	67	69	21	42	98	77	27	28	23	25	23	26	155	50	50	7	-2	-3	-1	21	-21
492	France	Femme	24	2	19	50	74	67	66	30		22	58	&#233l&#232ve ou &#233tudiant	5	9	concubinage	1	0	72	50	85	60	48	63	68	59	68	39	18	17	0	0	169	66	67	22	1	0	29	9	-15
493	France	Femme	39	2	79	65	74	33	66	64	67	34	31	cadre et profession intellectuelle sup&#233rieure	6	80	mari&#233	1	1	73	86	73	84	30	38	64	65	38	39	27	6	30	74	163	44	44	-13	21	-44	-1	-1	-8
494	France	Femme	55	1	100	100	28	100	100	100	100	100	100	profession interm&#233diaire	4	100	mari&#233	1	3	41	50	47	50	11	93	91	8	7	89	10	34	10	90	175	65	65	-9	-24	-80	-82	83	-82
495	France	Homme	47	1	16	16	14	77	67	17	19	50	25	cadre et profession intellectuelle sup&#233rieure	5	64	PACS&#233	1	1	68	50	50	50	50	50	50	50	50	50	50	50	1	0	177	128	128	18	0	1	0	0	0
496	France	Femme	48	1	8	50	50	7	4	7	66	50	76	profession interm&#233diaire	4	81	mari&#233	1	2	51	50	50	50	11	50	83	50	8	83	6	8	4	50	160	88	86	1	-2	-46	-75	33	-39
501	France	Femme	60	2	98	19	5	4	4		4	38	71	artisan, commer&#231ant ou chef d'entreprise	2	74	autre		0	95	1	3	3	29	32	90	50	70	13	12	72	6	5	155	67	67	94	-60	1	57	40	-3
502	France	Femme	60	2	50	50	50	89	50	50	67	50	50			100	mari&#233	1	2	78	62	62	59	36	39	62	50	23	37	50	50	28	44	169	52	52	16	0	-16	-14	12	-3
503	France	Femme	56		50	50	15	66	67	67	70	50	50	cadre et profession intellectuelle sup&#233rieure	6	88	autre		0	76	28	76	32	50	50	19	21	25	23	17	31	28	30	163			48	-14	-2	2	-2	0
504	France	Femme	66	2	39	27	53	25	18	18	15	77	20	retrait&#233	4	72	autre		2	50	69	69	71	38	36	74	77	36	63	32	35	29	62	173	66	70	-19	-3	-33	-27	-3	2
506	France	Homme	70	2	80	82	50	0	73	100	50	50	0	retrait&#233	2	82	mari&#233	1	2	66	73	79	82	18	16	73	77	21	21	21	22	50	50	183	112		-7	-1	0	0	-4	2
507	France	Femme	35	2	65	100	67	0	0	100	90	100	0	profession interm&#233diaire	2	100	c&#233libataire	2	0	100	27	49	47	17	83	100	30	28	75	2	100	0	100	161	75	79	73	-98	-100	-47	70	-66
508	France	Femme	30	2	89	100	29	48	62	82	50	83	0	artisan, commer&#231ant ou chef d'entreprise	4	100	concubinage	1	0	80	48	62	71	50	50	50	87	50	50	33	84	51	50	159	50	54	32	-51	1	0	-37	0
545	France	Femme	33	1	77	97	70	98	23	75	75	70	22		4	84	mari&#233	1	2	63	91	86	83	23	92	76	64	29	76	3	3	5	65	161	50	49	-28	0	-60	-47	12	-69
548	France	Femme	59	1	0	1	2	3	3	1	1	3	3	ouvrier	2	100	mari&#233	1	3	98	97	98	100	18	19	94	93	0	0	2	0	0	0	157	48	48	1	2	0	0	1	-1
574	France	Homme	57	2	72	74	50	50	50	50	64	50	50	artisan, commer&#231ant ou chef d'entreprise	2	100	mari&#233	1	3	50	50	50	50	50	50	50	50	50	50	50	50	50	50	175	75	75	0	0	0	0	0	0
575	France	Homme	26	1	16	2	4	7	80	100	5	68	32	artisan, commer&#231ant ou chef d'entreprise	2	97	PACS&#233	1	1	84	83	83	82	38	77	76	76	76	79	0	3	20	78	173	62	65	1	-3	-58	-3	0	-39
580	France	Femme	29	2	50	75	73	77	50	50	80	50		ouvrier	2	91	mari&#233	1	1	99	28	26	36	23	50	94	94	6	9	14	21	3	2	165	75	75	71	-7	1	-3	0	-27
586	France	Homme	40	2	50	50	23	50	50	50	0	50	50	cadre et profession intellectuelle sup&#233rieure	6	50	mari&#233	1	2	50	50	50	50	50	50	83	50	50	50	50	50	50	50	170	70	70	0	0	0	0	33	0
588	France	Femme	24	1	77	78	77	83	98	6	76	77	6	cadre et profession intellectuelle sup&#233rieure	6	96	concubinage	1	0	90	78	73	73	9	93	97	77	95	95	5	5	5	5	164	57	55	12	0	0	0	20	-84
599	France	Femme	55	2	2	1	1	1	83	5	1	3	70	cadre et profession intellectuelle sup&#233rieure	5	83	c&#233libataire	2	2	97	96	98	97	24	25	85	52	50	50	5	2	6	5	173	60	61	1	3	1	0	33	-1
602	France	Homme	63	2	96	38	4	50	50	50	9	14	0	retrait&#233	2	50	c&#233libataire	2		50	50	50	50	50	50	50	50	50	50	50	50	6	0	180	78	78	0	0	6	0	0	0
611	France	Femme	59	1	70	73		69							1	77	mari&#233	1	3	88	85	86	84	20	75	85	36	19	18	21	17	50	50	156	59	58	3	4	0	1	49	-55
613	France	Homme	59	2	50	2	11	1	29	92	5	81	2	retrait&#233	4	26	c&#233libataire	2		93	94	93	95	50	50	50	50	50	50	7	8			173	90	90	-1	-1		0	0	0
614	France	Homme	62	2	78	66	39				68	63		retrait&#233	4	96	mari&#233	1	1	60	40	53	56							32	39	43	39	178	88	88	20	-7	4
620	France	Homme	45	2	72	72	66	79	83	72	60	33	65	cadre et profession intellectuelle sup&#233rieure	5	29	mari&#233	1	2	81	92	92	92	62	75	50	50	50	50	14	15	50	56	180	83	84	-11	-1	-6	0	0	-13
625	France	Femme	59	1	100	100	1	100	82	12	85	10	89	profession interm&#233diaire	4	84	mari&#233	1	2	50	9	9	12	14	89	86	0	12	52	15	17	24	85	165	64	61	41	-2	-61	-40	86	-75
634	France	Femme	45	2	77	69	24	26	29	98	11	82	11	cadre et profession intellectuelle sup&#233rieure	6	74	concubinage	1	2	88	88	87	86	25	9	88	77	85	70	10	11	14	26	174	80	78	0	-1	-12	15	11	16
636	France	Femme	42	1	5	3	2	6	2	2	2	2	2	cadre et profession intellectuelle sup&#233rieure	6	67	c&#233libataire	2	0	50	36	34	37	12	12	64	63	29	49	20	84	17	17	165	60	62	14	-64	0	-20	1	0
638	France	Femme	37	1	21	61	39	74	73	27				cadre et profession intellectuelle sup&#233rieure	4	71	PACS&#233	1	2	100	21	96	100	36		72	50	50	76	0	71	17	18	150	56	56	79	-71	-1	-26	22
640	France	Femme	28	1	14	69	69	73	49		69	64		cadre et profession intellectuelle sup&#233rieure	6	100	PACS&#233	1	2	70	26	28	69	65	65	50		50		22	23	57	57	174	56	56	44	-1	0			0
641	France	Homme	35	1	2	1	3	9	1	2	1	2	3	cadre et profession intellectuelle sup&#233rieure	6	64	mari&#233	1	3	68	40	50	50	71	84	85	85	61	62	30	71	2	3	187	100	100	28	-41	-1	-1	0	-13
643	France	Femme	42	1	100	100	100	100	99	0	100	9	91	profession interm&#233diaire	5	82	mari&#233	1	2	97	0	0	0	19	81	50	11	50	18	7	50	36	61	168	68	70	97	-43	-25	32	39	-62
644	France	Femme	52	1	86	81	82	84	59	68	68	50	69	cadre et profession intellectuelle sup&#233rieure	6	95	concubinage	1	1	87	88	89	87	31	73	80	28	16	40	13	14	9	50	168	60	59	-1	-1	-41	-24	52	-42
646	France	Femme	54	1	98	100	3	99	85	17	76	38	73	profession interm&#233diaire	4	79	c&#233libataire	2	0	50	50	50	50	50	50	63	23	50	50	50	50	50	62	158	62	61	0	0	-12	0	40	0
647	France	Femme	30	2	50	50	50	65	50	50	50	50	72	profession interm&#233diaire	2	100	mari&#233	1	0	68	64	50	50	50	50	50	50	50	50	50	50	0	16	162	56	57	4	0	-16	0	0	0
648	France	Femme	28	2	74	64	29	50	24	83	32	80	0	profession interm&#233diaire	4	100	PACS&#233	1	1	71	71	73	75	50	50	72	63	70		20	6	50	62	168	70	70	0	14	-12		9	0
649	France	Homme	46	2	10	0	22	0	0	99	0	70	4	profession interm&#233diaire	4	99	mari&#233	1	0	98	77	68	68	58	59	85	85	19	49	0	0	50	33	170	62	60	21	0	17	-30	0	-1
651	France	Homme	38	1	79	80	50	73	50	50	66	50	50	cadre et profession intellectuelle sup&#233rieure	5	100	c&#233libataire	2	0	50	50	50	50		72	50	50	50	50	50	50	50	76	189	80	80	0	0	-26	0	0
654	France	Femme	45	1	50	50	50	50	50	22	50	50	17		4	73	mari&#233	1	2	92	49	31	26	25	50	89	60	14	35	6	32	26	33	162	58	59	43	-26	-7	-21	29	-25
656	France	Femme	24	1	77	57	36	65	43	13	61	74	36	cadre et profession intellectuelle sup&#233rieure	4	78	concubinage	1	0	98	80	82	82	50	59	70	71	62	62	4	6	50	50	169	70	70	18	-2	0	0	-1	-9
657	France	Femme	32	1	78	64	15	12	2	71	66		83	profession interm&#233diaire	4	89	concubinage	1	0	78	26	70	71	50	50	50	50	50	50	16	79	28	80	159	62	62	52	-63	-52	0	0	0
658	France	Femme	54	1	0	11	12	0	50	50	9	9	12	cadre et profession intellectuelle sup&#233rieure	5	82	autre		3	99	100	100	100											160	60	60	-1
662	France	Femme	38	1	95	97	90	98	85	86	87	79	94	profession interm&#233diaire	2	33	mari&#233	1	3	69	31	37	40	34	81	76	37	32	75	7	37	27	73	172	110	113	38	-30	-46	-43	39	-47
663	France	Femme	50	1	50	34	12	50	10	99	11	50	4	profession interm&#233diaire	4	94	mari&#233	1	1	97	50	50	92	50	60	50	50	50	50	24	50	50	50	164	71		47	-26	0	0	0	-10
666	France	Homme	31	1	32	27	28	82	12	86	27	78	12	cadre et profession intellectuelle sup&#233rieure	6	60	mari&#233	1	1	71	72	50	64									17	23	178	72	72	-1		-6
669	France	Homme	38	1	68	100	27	100	61	34	67	31	81	ouvrier	2	0	concubinage	1	3	100	0	0	0		100	54	41	1	98	31	77	3	1	190	120	120	100	-46	2	-97	13
670	France	Femme	46	1	0	0	0	0	65	100	1	100	0	profession interm&#233diaire	4	94	autre		1	100	100	100	100	0	0	100	100	0	0	0	0	0	0	162	81	81	0	0	0	0	0	0
671	France	Femme	48	1	79	81	2	84	50	50	50	98	9	profession interm&#233diaire	4	98	mari&#233	1	2	93	50	50	16	81	96	96	2	87	50	1	50	8	9	162	65	65	43	-49	-1	37	94	-15
672	France	Femme	39	1	73	73	71	92	68	14	78	27	71	cadre et profession intellectuelle sup&#233rieure	6	84	concubinage	1	2	87	27	24	25	13	73	64	37	38	66	2	0	4	60	168	67	67	60	2	-56	-28	27	-60
673	France	Femme	43	2	71	79	19	77	26	27	72	57	26	profession interm&#233diaire	5	71	mari&#233	1	2	92	49	61	61											171	73	73	43
674	France	Femme	39	1	40	65	15	71	71	75	63	25	40	profession interm&#233diaire	2	71	concubinage	1	0	66	68	70	72	28	47			35	35	30	27	40	37	168	67		-2	3	3	0		-19
676	France	Femme	40	1	73	50	75	59	65	50	62	50	61	cadre et profession intellectuelle sup&#233rieure	5	74	c&#233libataire	2	3	50	50	25	24	50	50	50	50	50	66	67	65	28	69	164	54	54	0	2	-41	-16	0	0
677	France	Femme	41	2	5	50	69	88	50	50	50	80	3	cadre et profession intellectuelle sup&#233rieure	6	74	PACS&#233	1	2	85	65	76	76	9	50	50	36	25	73	2	2	64	69	175	68	68	20	0	-5	-48	14	-41
679	France	Femme	57	2	64	88	1	98	30	27	70	69	29	cadre et profession intellectuelle sup&#233rieure	6	91	autre		1	95	81	80	83	32	31	93	77	26	27	10	25	13	18	156	59	56	14	-15	-5	-1	16	1
680	France	Homme	60	1	43	58	3	56	39	53	40	45	2	cadre et profession intellectuelle sup&#233rieure	6	98	mari&#233	1	2	97	97	97	96	30	31	73	73	3	3	4	3	50	50	170	77	77	0	1	0	0	0	-1
681	France	Femme	49	1			16	30	80		12	50	0	cadre et profession intellectuelle sup&#233rieure	4	86	mari&#233	1	1	100	50	50		0	0	84	66	7	8	0	6			170	65	65	50	-6		-1	18	0
682	France	Femme	43	1		71	61	66	72	81			62	profession interm&#233diaire	1	75	mari&#233	1	1	69	70	73	76		71	85	60	58	77	23	1			166	79	78	-1	22		-19	25
683	France	Homme	57	2	18	7	3	25	14	84	4	80	11	cadre et profession intellectuelle sup&#233rieure	4	89	mari&#233	1	2	99	85	78	92	27	27	90	75	26	16	9	15	64	67	182	73	73	14	-6	-3	10	15	0
687	France	Femme	44	2	50	50	50	50	50	93	0	0	0	cadre et profession intellectuelle sup&#233rieure	6	91	mari&#233	1	1	100	25	100	74	8	7	100	89	0	14	0	0		50	167	68	70	75	0		-14	11	1
688	France	Homme	43	1	30	33	0	70	70	48	51	100	0	profession interm&#233diaire	4	0	mari&#233	1	3	100	100	100	100	0	0	100	100	28	53	0	0	53	54	175	79	79	0	0	-1	-25	0	0
690	France	Femme	48		50	76	87	99	98	99	50	87	59	profession interm&#233diaire	4	100	mari&#233	1	2	90	5	30	7	50	76	81	35	15	50	10	50	3	4	160	51	50	85	-40	-1	-35	46	-26
691	France	Homme	57	1	30	30	1	0	1	0	14	3	1	cadre et profession intellectuelle sup&#233rieure	5	63	concubinage	1	2	97	50	50	50	76	26	76	75	82	20	2	50	50	50	172	68	68	47	-48	0	62	1	50
692	France	Femme	34	2	4	4	80	91	60	82	4	36	62	cadre et profession intellectuelle sup&#233rieure	6	82	PACS&#233	1	2	97	71	73	72	55	75	78	93	50	50	6	1	14	14	163	62	62	26	5	0	0	-15	-20
694	France	Femme	46	2		17	17	6	11		6	5	3		2	82	concubinage	1	2	40	30	30	30	4	20	83	54			11	89	6	8	167	56	57	10	-78	-2		29	-16
695	France	Homme	59	2	72	86		23		50		82	50	profession interm&#233diaire	5	85	mari&#233	1	2	70	16	12	10	50	79	50	50	66	85	50	50	50	85	166	69	71	54	0	-35	-19	0	-29
697	France	Femme	37	2	83	93	88	82	90	16	90	17	71	profession interm&#233diaire	4	80	mari&#233	1	2	82	25	27	28	61	75	33	18	67	83	32	17	61	84	163	73	74	57	15	-23	-16	15	-14
698	France	Femme	33	2	50	21	68	67	22	13	72	68	20	profession interm&#233diaire	5	75	PACS&#233	1	1	79	50	50	50	50	57	50	50	50	50	31	31	24	24	161	48	48	29	0	0	0	0	-7
699	France	Homme	42	1	63	56	55	58	50	50	50	50	50	cadre et profession intellectuelle sup&#233rieure	4	88	PACS&#233	1	2	84	42	39	43	50	50	50	50	50	50	50	50	50	50	168	59	59	42	0	0	0	0	0
700	France	Femme	32	1	84	99	86	89	66	37	84	41	62	profession interm&#233diaire	4	23	c&#233libataire	2	0	67	29	30	61		66		37	55	63	29	28	22	65	159	64	62	38	1	-43	-8
701	France	Femme	41	1	100	100	100	100	100	0	100	0	100	profession interm&#233diaire	4	100	PACS&#233	1	1	100	0	0	0	23	100	80	0	26	77	49	0	12	100	163	70	68	100	49	-88	-51	80	-77
702	France	Femme	38	1	50	50	50	50	50	50	50	50	50	ouvrier	4	73	mari&#233	1	2	97	50	63	50	50	50	50	50	78	78	3	67	50	64	166	62	64	47	-64	-14	0	0	0
703	France	Femme	44	2	98	98	74	76	99	24	96	18		profession interm&#233diaire	4	77	mari&#233	1	2	98	80	83	84	0	84	98	2	2	84	4	4	23	98	166	58	56	18	0	-75	-82	96	-84
705	France	Homme	29	1	2	7	9	50	77	6	9	50	9	cadre et profession intellectuelle sup&#233rieure	6	78	concubinage	1	0	65	14	4	75	24	90	50	50	16	71	21	61	10	8	180	95	98	51	-40	2	-55	0	-66
706	France	Femme	57	2	24	24	24	23	27	50	24	18	22	cadre et profession intellectuelle sup&#233rieure	4	83	mari&#233	1	0	82	86	91	91	50	50	80	50	86	50	14	15	3	42	157	85	85	-4	-1	-39	36	30	0
708	France	Femme	54	1	100	100	100	100	98	11	99	0	100	profession interm&#233diaire	2	50	mari&#233	1	2	100	40	54	50	20	96	70	24	44	19	16	42	50	84	163	67	67	60	-26	-34	25	46	-76
710	France	Femme	46	1	0	72	0	73	92	23	0	38	67	cadre et profession intellectuelle sup&#233rieure	6	77	c&#233libataire	2	0	81	57	58	59	24	44	68	50	27	62	18	0	1	0	156	57	55	24	18	1	-35	18	-20
711	France	Femme	48	2				67					25	cadre et profession intellectuelle sup&#233rieure	2	66	PACS&#233	1	0	65	27	68	66	26	76									172	72	70	38					-50
713	France	Femme	58	1	100	100	97	97	100	100	96	96	95	profession interm&#233diaire	5	100	mari&#233	1	0	93	6	56	24	5	100	100	7	2	50	24	18	0	50	165	65	65	87	6	-50	-48	93	-95
718	France	Femme	36	2	75	74	78	81	77	24	79	50	50	profession interm&#233diaire	4	79	PACS&#233	1	1	50	50	50	50	50	62	50	50	50	57	20	5	63	78	164	51	52	0	15	-15	-7	0	-12
719	France	Homme	33	1	0	99	49	71	66	22	95	50	61	cadre et profession intellectuelle sup&#233rieure	4	100	mari&#233	1	0	100	71	50	65	84	69	56	50	48	42	0	41	0	72	175	73	76	29	-41	-72	6	6	15
721	France	Femme	32	2	83	83	50	83	50	80	61	80	5	cadre et profession intellectuelle sup&#233rieure	5	92	mari&#233	1	0	99	83	79	86	19	23	81	54	93	70	3	34	2	70	166	58	59	16	-31	-68	23	27	-4
723	France	Homme	64	1	95	84	14	87	30	32	88	68		cadre et profession intellectuelle sup&#233rieure	4	83	mari&#233	1	2	84	80	81	81	21	21	82	65	9	10	22		29	68	182	84	84	4		-39	-1	17	0
725	France	Femme	32	1	73	82	35	81	81	83	66	27	30	profession interm&#233diaire	2	83	PACS&#233	1	1	83	80	76	78	36	77	50	50	26	79	38	36	11	12	160	53	54	3	2	-1	-53	0	-41
726	France	Femme	33	1	18		82	99	87	72	77	75	96	cadre et profession intellectuelle sup&#233rieure	6	13	PACS&#233	1	0	98	98	96	98	23	79	89	68	57	75	2	1	4	3	172	65	65	0	1	1	-18	21	-56
728	France	Homme	33	2	67	71	71	72	90	100	20	17	74	cadre et profession intellectuelle sup&#233rieure	6	84	c&#233libataire	2	0	76	77	77	70		68						50			180	72	72	-1
730	France	Homme	39	1	81	91	12	91	50	50	85	50	50	cadre et profession intellectuelle sup&#233rieure	6	79	mari&#233	1	5	50	22	50	50	50	50	50	50	50		50	50	20	50	175	72	72	28	0	-30		0	0
731	France	Homme	38	2	0	0	50	0	0	100	0	50	0	cadre et profession intellectuelle sup&#233rieure	5	100	mari&#233	1	2	50	19	20	23	50	50	50	50	50	50	50	78	0	0	178	75	75	31	-28	0	0	0	0
733	France	Homme	62		12	8	0	50	11	73	4	50	4	cadre et profession intellectuelle sup&#233rieure	6	91	mari&#233	1	3	50	50	50	50	34	50	73	58	50	50	0	2	0	0	175	100	100	0	-2	0	0	15	-16
735	France	Femme	36	1	73	75	77	79	0		74		0	cadre et profession intellectuelle sup&#233rieure	6	100	PACS&#233	1	2	85	23	50	50	0	30	100	33	0	34	2	23	0	50	175	65	63	62	-21	-50	-34	67	-30
736	France	Femme	25	1	50		0	59	63	11		34	12	profession interm&#233diaire	4	64	concubinage	1	0	71	74	76	76	34	34	30	32	35	37	41	64	50	50	161	78	78	-3	-23	0	-2	-2	0
737	France	Femme	49	2	64	77	50	50	50	19	81	50	62	cadre et profession intellectuelle sup&#233rieure	4	83	mari&#233	1	2	85	50	25		50	50	50	27	50	50	28	67	63	63	166	69	71	35	-39	0	0	23	0
738	France	Femme	38	1	33	83	61	83	11	13	80	14	60	profession interm&#233diaire	4	70	PACS&#233	1	2	90	64	67	66	50	50	50	50	50	50	6	67	31	31	163	63	65	26	-61	0	0	0	0
740	France	Femme	40	1	83	75	65	82	57	72	62	50	62	cadre et profession intellectuelle sup&#233rieure	5	65	mari&#233	1	2	73	22	50	50											170	73	74	51
742	France	Femme	33	1	23	50	21	90	69	11	21		65	cadre et profession intellectuelle sup&#233rieure	6	79	PACS&#233	1	0	84	65	64	77		69					8	26	4	9	168	96	94	19	-18	-5
743	France	Femme	55	1	84	86	89	89	92	46	78	50	84	cadre et profession intellectuelle sup&#233rieure	5	73	mari&#233	1	1	83	80	80	80		67	86	19		59	12	13		81	165	76	73	3	-1			67
744	France	Femme	30	2	66	64	55	55	90	9	55	51	33	cadre et profession intellectuelle sup&#233rieure	6	0	PACS&#233	1	1	100	0	100	0	50	70				28	25	0	0	0	176	63	64	100	25	0			-20
746	France	Femme	55	1	5	29	15	9	50	50	3	77	0	cadre et profession intellectuelle sup&#233rieure	6	72	mari&#233	1	3	74	70	76	78	50	50	50	42			4	3	50	50	163	52	52	4	1	0		8	0
747	France	Femme	54	1	31	30	16	43	9	88	18	82		profession interm&#233diaire	4	50	mari&#233	1	2	100	90	85	85			85	62		29	7	34	5	14	163	68	70	10	-27	-9		23
748	France	Homme	40	1	68	74	63	20	20	51	62	27	24	profession interm&#233diaire	4	73	c&#233libataire	2	2	80	50	49	53	44	81	71	38	78	26	25	70	2	3	173	67	67	30	-45	-1	52	33	-37
750	France	Femme	54	1	73	79	98	99	58	60	51	51	50	profession interm&#233diaire	4	85	autre		1	96	50	53	73	61	99	82	29	17	50	3	2	23	93	158	82	77	46	1	-70	-33	53	-38
753	France	Femme	55	2	77	79	7	98	90	39	59	76	73	profession interm&#233diaire	4	68	c&#233libataire	2	0	90	50	50	50	46	65	50	16	50	50	1	27	55	80	150	40	40	40	-26	-25	0	34	-19
754	France	Femme	32	2	60	77	86	60	40	81	84	9	26	cadre et profession intellectuelle sup&#233rieure	6	54	mari&#233	1	1	46	36	34	29	50	72	63	31	50	50	50	50	50	50	164	48	48	10	0	0	0	32	-22
757	France	Femme	61	1	66	78	34	86	84	21	65	38	68	cadre et profession intellectuelle sup&#233rieure	4	99	c&#233libataire	2	0	87	87	88	88	50	50	50	50	50	50	50	50	50	50	163	98	98	0	0	0	0	0	0
758	France	Femme	50	1	86	70	0	73	60	35	90	58	19	cadre et profession intellectuelle sup&#233rieure	6	66	mari&#233	1	2	100	50	50	71	50	22	62	58	61	50	3	3	50	59	162	58	58	50	0	-9	11	4	28
759	France	Femme	56	1	50	78	79	79	98	3	50	21	82	cadre et profession intellectuelle sup&#233rieure	5	78	mari&#233	1	2	45	50	50	53	26	50	52	27	34	68	50	50	50	50	175	71	72	-5	0	0	-34	25	-24
760	France	Femme	49	1	19	18	16	12	12	65	12	40	1	cadre et profession intellectuelle sup&#233rieure	6	83	mari&#233	1	2	70	42	62	64	50	50	100	59	50	38	4	34	18	16	168	66	68	28	-30	2	12	41	0
762	France	Femme	59	1	28	28	27	27	33	24	0	17	0	cadre et profession intellectuelle sup&#233rieure	5	77	mari&#233	1	0	89	93	88	91	31	30	50	50	50	50	50	50	50	50	166	70	70	-4	0	0	0	0	1
763	France	Femme	51	1			3			25				cadre et profession intellectuelle sup&#233rieure	2	77	autre		2	50	50	50	50	50	50	50	30	50	50	11	26	50	50	169	64	64	0	-15	0	0	20	0
765	France	Femme	33	1	46	63	21	67	49	65	56	68	14	profession interm&#233diaire	4	99	PACS&#233	1	0	98	46	49	61	34	50	50	35	62	41	3	50	50	50	170	58	58	52	-47	0	21	15	-16
766	France	Femme	27	2	72	65		92	75		70		27	cadre et profession intellectuelle sup&#233rieure	5	92	c&#233libataire	2	0	70	40	36	37	34	35	28	28	23	24	2	26	23	68	170	66	66	30	-24	-45	-1	0	-1
768	France	Femme	54	2	60	54	63	62	47	50	52	50	50	ouvrier	2	59	mari&#233	1	2	47	64	52	55	52	50	48	49	28	33	41	32	57	56	163	60	60	-17	9	1	-5	-1	2
770	France	Femme	57	2	80	50	27	76	27	16	50	80	27	cadre et profession intellectuelle sup&#233rieure	4	76	mari&#233	1	2	74	50	50	50	63	35	80	82	85	19	5	30	50	50	162	52	52	24	-25	0	66	-2	28
771	France	Femme	32	2	50	50	50	71	50	75	50	81	20	profession interm&#233diaire	6	65	concubinage	1	1	86	50	50	50	50	72	88	73	72	72	11	3	4	5	167	58		36	8	-1	0	15	-22
772	France	Homme	43	1	26	70	50	50	60	75	60	63	61	cadre et profession intellectuelle sup&#233rieure	6	76	mari&#233	1	2	71	34	26	27	50						29	69	26	61	171			37	-40	-35
774	France	Femme	61	1	66	65	54	82	50	73	60	67	63	profession interm&#233diaire	4	96	autre		0	55	77	77	77	33	61	65	41	41	42	15	11	24	22	166	58	58	-22	4	2	-1	24	-28
776	France	Femme	36	1	90	75	30	63	68	69	86	36	33	cadre et profession intellectuelle sup&#233rieure	6	77	mari&#233	1	2	91	53	65	57	25	58	76	52	50	61	1	13	35	80	167	57	58	38	-12	-45	-11	24	-33
777	France	Homme	27	2	50	73	35	50	25	50	50	50	0	cadre et profession intellectuelle sup&#233rieure	5	97	concubinage	1	0	75	89	75	75	28	30	82	73	34	50	22	60	21	21	183	76	76	-14	-38	0	-16	9	-2
778	France	Femme	27	1	0	81	78	100	76	8		52	50		6	0	c&#233libataire	2	0	100	100	98	100					13	87			50	50	180	72	71	0		0	-74
780	France	Femme	37	2					65					cadre et profession intellectuelle sup&#233rieure	4	33	PACS&#233	1	1	91	94	96	96						14								-3
781	France	Femme	44	2	84	81	12	61	79	71	45	50	60	profession interm&#233diaire	4	71	c&#233libataire	2		69	32	60	18	50	50	50	50	21	72	50	71	50	62	158			37	-21	-12	-51	0	0
782	France	Femme	32	1		72	0	74	74		38	37	58	profession interm&#233diaire	4	97	PACS&#233	1	1	99	97	97	99	1	1	99	36	2	2	2	2	2	1	168	75	75	2	0	1	0	63	0
784	France	Homme	47	1	2	0	0	0	9	8	3	3	0	profession interm&#233diaire	4	100	autre		3	85	80	50	74	97	100	99	98	20	23	1	28	10	3	184	84	84	5	-27	7	-3	1	-3
786	France	Femme	56	2	50	50	50	96	50	50	50	26	32	profession interm&#233diaire	2	99	concubinage	1	2	98	4	50	4	50	50	50	50	50	50	50	50	50	50	168	65	67	94	0	0	0	0	0
787	France	Homme	59	1	81	76	64	89	50	66	64			cadre et profession intellectuelle sup&#233rieure	2	79	PACS&#233	1	2	72	37	50	50		72	68	64	50	55	17	34	65	76	188	85	87	35	-17	-11	-5	4
788	France	Femme	48	1	80	72	35	72	68	68	69	67	39	cadre et profession intellectuelle sup&#233rieure	6	89	c&#233libataire	2	2	88	26	60	30	50	60	64	50	50	50	15	58	50	63	162	62	63	62	-43	-13	0	14	-10
789	France	Homme	57	2	98	98	96	96	50	83	81	83	50	ouvrier	1	99	mari&#233	1	2	96	2	3	2	50	95	50	13	50	50		94	50	95	173	72	73	94		-45	0	37	-45
793	France	Femme	25	2	74	73	13	100	69	25	71	67	50	profession interm&#233diaire	4	87	PACS&#233	1	0	81	15	33	0	62	33	76	30	72	50	21	72	50	62	154	50	51	66	-51	-12	22	46	29
795	France	Homme	44	1	63	23	67	8	50	64	0	100	33	cadre et profession intellectuelle sup&#233rieure	6	60	concubinage	1	0	83	85	84	83	0	0	71	72	19	20	8	8	0	0	170	88	88	-2	0	0	-1	-1	0
797	France	Homme	43	1	72	74	75	76	68	97	75	50	50	cadre et profession intellectuelle sup&#233rieure	6	79	c&#233libataire	2	2	84	28	19	20	64	57	60	47	63	50	26	69	58	67	176	61	62	56	-43	-9	13	13	7
798	France	Femme	60	1	73	81	2	1	100	100	50	76	64	cadre et profession intellectuelle sup&#233rieure	4	86	mari&#233	1	0	94	50	35	39	22	27	91	50	35	68	10	77	1	0	170	63	63	44	-67	1	-33	41	-5
800	France	Femme	35	2	13	61	11	52	35	73		87	4	profession interm&#233diaire	4	87	mari&#233	1	1	85	81	82	80	27	27	80	79	48	72	9	11	50	50	165	68	69	4	-2	0	-24	1	0
801	France	Femme	50	2	73	17	13	75	10		55	15	12	cadre et profession intellectuelle sup&#233rieure	6	99	veuf	3	2	78	79	82	81			50				0	11			177	65	65	-1	-11
804	France	Femme	47	2	97	96	75		50	83	97	81	21	profession interm&#233diaire	4	98	c&#233libataire	2	1	72	87	100	74			44	5		79	2	3	52	95	164	60	62	-15	-1	-43		39
805	France	Homme	23	1	0	0	0	100	100	0	100	50	100	profession interm&#233diaire	4	99	concubinage	1	0	100	50	50	50	0	0	100	100	100	96	0	0	100	100	180	73	73	50	0	0	4	0	0
806	France	Femme	55	1	65	72	71	90	50	50	50	73	50	ouvrier	2	81	mari&#233	1	3	98	53	50	50	74	76	50	23	50	28	50	50	50	68	167	64	64	45	0	-18	22	27	-2
808	France	Femme	52	1	50	3	2	2		50	4	50	15	cadre et profession intellectuelle sup&#233rieure	5	76	mari&#233	1	3	50	75	50	50	50	50	50	50	50	50	50	50	4	3	173	106	106	-25	0	1	0	0	0
809	France	Femme	37	2	67	68	67	62	66		73	34	16	cadre et profession intellectuelle sup&#233rieure	5	65	autre		2	60	35	35	35											168	54	55	25
810	France	Femme	38	1	88	87	79	85	82	50	85	82	89	profession interm&#233diaire	2	87	c&#233libataire	2	0	21	22	19	18		77	81	81		75	50	50	50	50	166	52	51	-1	0	0		0
811	France	Homme	31	1	86	86	55	100	78	33	64	38	76	cadre et profession intellectuelle sup&#233rieure	4	19	mari&#233	1	0	100	26	64	25	18	58	83	60	18	40	6	32	0	50	185	65	65	74	-26	-50	-22	23	-40
812	France	Homme	34	2	0	27	23	18	18	20	20	25	15	cadre et profession intellectuelle sup&#233rieure	6	82	PACS&#233	1	1	75	47	38	64	10	12	85	72	8	12	25	55	12	27	176	80	80	28	-30	-15	-4	13	-2
813	France	Femme	25	2	14	19	0	1	33	77	0	82	10	cadre et profession intellectuelle sup&#233rieure	6	75	concubinage	1	0	92	91	96	72	14	14	71	61	69	68	20	20	10	16	168	64	62	1	0	-6	1	10	0
815	France	Femme	26	2	68	37	2	68	3	76	60		1	&#233l&#232ve ou &#233tudiant	6	85	c&#233libataire	2	0	58	29	31	31			68				11	65	2	26	167	58	57	29	-54	-24
818	France	Femme	25	1	63	59	74	94	100	75	62	69	27	profession interm&#233diaire	4	70	c&#233libataire	2	0	100	35	37	44	100	72	100	32	48	39	0	70	0	54	170	76	73	65	-70	-54	9	68	28
819	France	Femme	58	1		51	12	11	0	11	12	56	0	cadre et profession intellectuelle sup&#233rieure	5	50	mari&#233	1	0	50	50	50	50	50	50	53	50	50	50	50	50	50	50	158	100	100	0	0	0	0	3	0
822	France	Homme	42	2	13	13	27	27	23	73	0	100	0	cadre et profession intellectuelle sup&#233rieure	6	50	mari&#233	1	2	100	100	98	100	0	1	79	82	22	22	0	0	0	0	180	78	78	0	0	0	0	-3	-1
824	France	Femme	49	1		85	81	90	88		70		82	cadre et profession intellectuelle sup&#233rieure	5	100	mari&#233	1		100	100	100	100	72	73					0	0						0	0				-1
826	France	Femme	45	1	75	77	29	69						cadre et profession intellectuelle sup&#233rieure	6		c&#233libataire	2	0	94	63	59	64	38						14	66	40		167	91	91	31	-52
827	France	Femme	35	1	68	69	55	74	75	50	48	61	70	profession interm&#233diaire	5	87	mari&#233	1	2	94	37	45	47	36	86	43	27	50	77	13	23	57	58	173	74	75	57	-10	-1	-27	16	-50
828	France	Femme	34	2	62	62	84	68	56	62	56	35	8	cadre et profession intellectuelle sup&#233rieure	5	66	PACS&#233	1	2	87	88	88	88	26	59	85	63	50	64	0	1	50	55	158	54	53	-1	-1	-5	-14	22	-33
829	France	Femme	37	1	13	76	33	79	60	96	62	50	69	cadre et profession intellectuelle sup&#233rieure	6	72	concubinage	1	0	94	76	86	88	6	20	64	59	17	17	2	40	4	5	171	65	65	18	-38	-1	0	5	-14
832	France	Homme	30	1	71	56	60	87	67	22	22	100	68	profession interm&#233diaire	4	79	PACS&#233	1	0	89	37	37	37		54			16	13	14	52	50	50	178	82	83	52	-38	0	3
833	France	Homme	52	1	82	21	20	23	72	26	26	50	50	cadre et profession intellectuelle sup&#233rieure	4	72	mari&#233	1	2	50	50	50	50	35	37	67	68	24	26	50	50	50	50	174	80		0	0	0	-2	-1	-2
834	France	Homme	55	2	40	38	11	17	13	11	21	18	1	cadre et profession intellectuelle sup&#233rieure	6	93	autre		3	77	80	83	85	36	37	42	43	24	25	1	1	18	29	170	80	80	-3	0	-11	-1	-1	-1
836	France	Femme	49	1	100	100	100	100	100	7	100	8	100	cadre et profession intellectuelle sup&#233rieure	6	100	c&#233libataire	2	3	100	4	1	0		75	63	24	69	38	6	3	68	100	168	66	65	96	3	-32	31	39
838	France	Femme	30	1	39	38	18	71	65	50	38	53	60	cadre et profession intellectuelle sup&#233rieure	6	60	PACS&#233	1	0	57	62	65	64											171	59	59	-5
839	France	Femme	37	1	50	68	16	50	50	50	50	50	12	profession interm&#233diaire	4	50	mari&#233	1	2	50	50	50	50	50	50	12	13	50	50	8	14	0	1	157	46	46	0	-6	-1	0	-1	0
841	France	Femme	50	1	31	72	75	66	15	35	50	68	38	cadre et profession intellectuelle sup&#233rieure	6	87	mari&#233	1	2	65	40	50	50	50	50	75	50	50	61	15	66	50	50	170	54	55	25	-51	0	-11	25	0
846	France	Femme	44		68	82	74	74	74	28	75	75	72	profession interm&#233diaire	4	75	mari&#233	1	2	79	24	30	30				34		65	33	63			150	68	68	55	-30
848	France	Femme	24	2	50	50	60	75	50	50	50	50	50	profession interm&#233diaire	4	71	c&#233libataire	2	0	69	67	70	74	57	70	50	35	73	73	27	28	50	70	166	83	81	2	-1	-20	0	15	-13
850	France	Femme	59	1	3	1	4	4	77	4	1			cadre et profession intellectuelle sup&#233rieure	6	98	mari&#233	1	4	80	98	97	95									1	2	172	60	60	-18		-1
851	France	Homme	26	1	67	66	29	32	75	26	67	21	73	cadre et profession intellectuelle sup&#233rieure	6	78	c&#233libataire	2	0	96	64	71	70	50		39	24	52		36	66			175	60	60	32	-30			15
852	France	Femme	47	1	97	98	98	98			98			profession interm&#233diaire	4	98	mari&#233	1	2	73	71	77	73				16					12	90	172	65	65	2		-78
854	France	Femme	57	1	98	98	50	98	50	50	72	50	50	profession interm&#233diaire	2	96	mari&#233	1	1	99	3	96	50	50	50	50	50	50	76	3	50	50	80	158	56	62	96	-47	-30	-26	0	0
858	France	Femme	42	2	67	80	57		77	27	59	74	62	profession interm&#233diaire	5	85	mari&#233	1	2	88	75	76	76	16	61	86	65	24	38	8	9	59	77	174	71	73	13	-1	-18	-14	21	-45
859	France	Homme	34	1	0	14	14	24	39	38	0	0	22	cadre et profession intellectuelle sup&#233rieure	6	90	mari&#233	1	0	92	71	40	64	9	20	93	81	81	82	10	27	17	16	173	63	63	21	-17	1	-1	12	-11
861	France	Femme	34	1	73	50	96	98	73	4	50	96	50	cadre et profession intellectuelle sup&#233rieure	4	78	mari&#233	1	2	96	97	96	96	17	16	84	50	6	9	4	5	2	3	170	90	90	-1	-1	-1	-3	34	1
862	France	Femme	44	1	86	93	75	80	68	50		62	59	profession interm&#233diaire	4	87	mari&#233	1	2	98	70	59	60	7	75	72	32			9	12	50	50	163	80	80	28	-3	0		40	-68
865	France	Homme	51	1	2	1	2	52	50	2	2	27	1	cadre et profession intellectuelle sup&#233rieure	6	99	PACS&#233	1	1	99	80	80	81	2	1	83	72	2	1	2	23	26	26	176	82	82	19	-21	0	1	11	1
866	France	Femme	41	2	39	64	71	85	50	50	66	34	74	cadre et profession intellectuelle sup&#233rieure	6	50	mari&#233	1	1	89	24	70	15	50	50	71	50	50	50	50	34	50	50	172	56	56	65	16	0	0	21	0
869	France	Femme	38	2	77	75	90	74	88	24	78	78	67	profession interm&#233diaire	4	20	PACS&#233	1	0	70	85	85	85		65		23			17	7			172	60	58	-15	10
870	France	Femme	51	1	71	84	70	95	79	59	50	50	75	profession interm&#233diaire	4	70	mari&#233	1	2	47	67	68	64	57	57	37	39	57	57	18	14	50	57	170	72	72	-20	4	-7	0	-2	0
872	France	Femme	28	2	50	50	50	72	82	80	57	69	56	profession interm&#233diaire	4	98	concubinage	1	0	100	26	40	32	12	36	10	37	75	22	2	80	7	36	170	55	55	74	-78	-29	53	-27	-24
875	France	Femme	38	2	2	50	1	76	0	69	25	76	6	profession interm&#233diaire	4	71	mari&#233	1	2	86	50	50	28	50	69	75	75	29	29	10	9	7	8	165	80	81	36	1	-1	0	0	-19
876	France	Femme	33	2	81	74	77	50	75	13	81	61	11	profession interm&#233diaire	2	92	mari&#233	1	2	88	23	23	29	22	65	73	31	22	39	18	83	11	12	175	72	72	65	-65	-1	-17	42	-43
877	France	Homme	28	1	67	50	50	50	50	50	50	50	50	&#233l&#232ve ou &#233tudiant	6	70	c&#233libataire	2	0	77	9	26	31	50	50	50	50	50	50	12	82	12	32	170	65	66	68	-70	-20	0	0	0
878	France	Femme	38	1	80	84		100			83	50	74		4	76				50	50	50	50	50	72	53	98	25	30	23	24	17	50	172	82	81	0	-1	-33	-5	-45	-22
880	France	Homme	67	2	68	32	32	50	12	27	63	64		retrait&#233	6	64	concubinage	1	3	88	64		44	42	68	79	36	23	61	9	59	35	66	173	74	74	24	-50	-31	-38	43	-26
881	France	Femme	60	1	82	82	15	36	74	64	66	71	63	cadre et profession intellectuelle sup&#233rieure	6	97	autre		3	100	86	86	74	26	29	69	61	12	15	17	16	50	50	164	72	72	14	1	0	-3	8	-3
883	France	Femme	41	1	74	67	69	67	81	90	65	80	21	cadre et profession intellectuelle sup&#233rieure	6	80	PACS&#233	1	2	86	35	55	43	67	50	36	68	79	27	11	39	8	26	180	67	67	51	-28	-18	52	-32	17
884	France	Femme	37	1	50	50	50	80	59	50	54	62	70	cadre et profession intellectuelle sup&#233rieure	5	50	mari&#233	1	2	74	20	20	16	17	80	69	27	15	67	21	2	12	12	172	85	83	54	19	0	-52	42	-63
886	France	Femme	50	1					82	50	60	32	64	profession interm&#233diaire	4	50	c&#233libataire	2	3	89	16	64	60		65	72	31	17	50	19	21	22	20	168	100	100	73	-2	2	-33	41
888	France	Femme	46	2	50	65	50	67	60	33	63	33	50	cadre et profession intellectuelle sup&#233rieure	5	66	mari&#233	1	3	94	50	50	50	50	57	66	35	32	31	3	2	29	50	172	83	83	44	1	-21	1	31	-7
890	France	Homme	35	2	86	86	63	91		32		96	57	profession interm&#233diaire	4	69	mari&#233	1	1	77	38	79	50	38	54	80	59	41	39	4	72	65	82	173	56	57	39	-68	-17	2	21	-16
891	France	Femme	56	2	82	89	16	100	48		75	41	81	profession interm&#233diaire	4	50	mari&#233	1	1	98	74	74	80	21	50	70	50	26	50	5	16	69	86	174	67	68	24	-11	-17	-24	20	-29
893	France	Femme	56	1	94	95	84	91	87	87	85	84	72		2	50	concubinage	1	0	62	62	29	42	4	65	84	67	2	73	2	50	50	64	170	66	66	0	-48	-14	-71	17	-61
894	France	Homme	41	1	75	79	72	72	68	75	78	50	50	cadre et profession intellectuelle sup&#233rieure	6	79	concubinage	1	1	77	28	31	32	50	50	50	50	50	50	50	50	50	65	180	62	62	49	0	-15	0	0	0
895	France	Femme	33	2	21	18	73	72	90	20	50	50	65	cadre et profession intellectuelle sup&#233rieure	5	50	PACS&#233	1	1	50	50	35	50	61	69	50	50	50	50	23	12	50	50	168	57	57	0	11	0	0	0	-8
896	France	Femme	59	1	96	97	2	76	4	0	65	9	7	profession interm&#233diaire	4	92	c&#233libataire	2	0	0	6	51	16	4	50	98	50	0	81	2	82	1	1	164	59	60	-6	-80	0	-81	48	-46
897	France	Femme	56	2	8	9	2	1	1	28	1	2	1	profession interm&#233diaire	2	80	mari&#233	1	1	78	79	81	80	28	28	84	83	15	15	10	8	1	0	150	62	62	-1	2	1	0	1	0
898	France	Femme	41	2	66	81	80	71	100	100	74	75	68	profession interm&#233diaire	4	72	c&#233libataire	2	0	82	21	30	28	50	69	76	25	80	82	0	77	44	54	168	74	75	61	-77	-10	-2	51	-19
899	France	Femme	42	2	63	61	19	83	71	71	72	76	79	profession interm&#233diaire	4	50	c&#233libataire	2	1	50	50	28	50	50	50	50	50	50	50	50	50	0	68	164	59	59	0	0	-68	0	0	0
900	France	Homme	63	1	16	16	4	28	3	96	6	95		cadre et profession intellectuelle sup&#233rieure	6	84	c&#233libataire	2	4	80	81	79	83	23	50	82	82	25	28	1	2	6	6	173	65	65	-1	-1	0	-3	0	-27
901	France	Homme	48	2	95	100	50	95	93	71	74	72	74	profession interm&#233diaire	4	98	PACS&#233	1	0	93	19	26	27	10	81	74	26	32	85	11	75	100	93	165	73	70	74	-64	7	-53	48	-71
902	France	Femme	32	1	75	87	63	65	67	68	75	58	0	cadre et profession intellectuelle sup&#233rieure	5		mari&#233	1	2	84	69	74	72	15	50	85	50	24	46	0	0	17	36	160	49	49	15	0	-19	-22	35	-35
904	France	Femme	50	1	50	84	87	75	50	30	71	38	50	profession interm&#233diaire	5	75	mari&#233	1	3	100	22	50	84	50	75	50	50	50	50	50	50	86	89	165	63	65	78	0	-3	0	0	-25
906	France	Femme	33	1		94	88	84		72	29	50		profession interm&#233diaire	5	98	PACS&#233	1	1	100	0	2	4		98		3	89	85	1	87			175	55	55	100	-86		4
908	France	Homme	24	2	15	72	46	95	12	71	85	14	13	cadre et profession intellectuelle sup&#233rieure	5	97	PACS&#233	1	0	82	19	20	50	21	79	71	21	8	7	30	59	28	28	163	68	68	63	-29	0	1	50	-58
909	France	Femme	47	1	13	28	3	28	0	0	12	50	2	profession interm&#233diaire	4	84	c&#233libataire	2	1	79	58	57	62	50	39	50	39	50	50	9	18	6	6	163	55	55	21	-9	0	0	11	11
911	France	Homme	48	1	99	98	99	99	3	80	78	28	25	cadre et profession intellectuelle sup&#233rieure	5	97	mari&#233	1	2	50	50	50	50	76	100	75		50				75	100	170	56	57	0		-25			-24
914	France	Femme	41	1	79	82	50	82	85	15	81	41	49	cadre et profession intellectuelle sup&#233rieure	4	79	mari&#233	1	3	50	93	87	88	18	59	9	61	3	75	0	0	11	84	177	78	74	-43	0	-73	-72	-52	-41
919	France	Femme	44	2	54	74	73	98	50	50	80	25	79	profession interm&#233diaire	4	75	mari&#233	1	2	96	3	6	6	24	83	85	17	14	68	14	79	5	6	160	62	62	93	-65	-1	-54	68	-59
921	France	Femme	50	1	99	100	59	100							2		mari&#233	1	1	94	78	82	76	63	83	92	68	18	20	9	70	13	15	165			16	-61	-2	-2	24	-20
922	France	Femme	36	2	50	62	71	37	76	21	59	33	13	cadre et profession intellectuelle sup&#233rieure	6	67	PACS&#233	1	1	67	48	58	59	50	60	50	57		50	17	69			162	65	66	19	-52			-7	-10
923	France	Femme	27	2	88	90	14	64	2	38	96	50	50	cadre et profession intellectuelle sup&#233rieure	5	50	c&#233libataire	2	0	100	4	2	2	50	50	50	50	50	50	50	50	47	73	164	60	60	96	0	-26	0	0	0
925	France	Homme	42	2	100	100	86	100	50	0	100	60	100	ouvrier	5	62	mari&#233	1	2	100	0	0	0	28	100	66	36	26	75	6	58	33	100	176	96	90	100	-52	-67	-49	30	-72
926	France	Femme	42	1		94		96	82	73		60	69	cadre et profession intellectuelle sup&#233rieure	6		autre		0	100	85	92	88						76		5			153	79	81	15
927	France	Femme	27	2	83	96	100	25	26	26	78	27	23	profession interm&#233diaire	2	97	PACS&#233	1	1	85	8	31	6	2	71	96	82	12	73	4	37	5	69	157	60	60	77	-33	-64	-61	14	-69
929	France	Femme	44	1	50	50	22	60	73	50	50	26	50	cadre et profession intellectuelle sup&#233rieure	6	94	mari&#233	1	2	50	50	50	50	50	50	50	50	50	50	11	13	50	50	170	66	66	0	-2	0	0	0	0
930	France	Femme	38	1	50	83	70	71	27	50	87	83	4	profession interm&#233diaire		78	mari&#233	1	1	94	81	79	83	25	69	78	23	26	80	12	13	78	76	155	48	48	13	-1	2	-54	55	-44
931	France	Femme	23	2	27	24	3	50	23	93	22	78	12	&#233l&#232ve ou &#233tudiant	5	29	c&#233libataire	2	0	66	67	40	65	26	25	74	73	28	28	17	16	2	3	158	56	55	-1	1	-1	0	1	1
934	France	Femme	50	2	33	21	20	71	0	86	23	75	63	cadre et profession intellectuelle sup&#233rieure	5	70	c&#233libataire	2	1	84	40	40	38	62	65	76	37	67	33	11	62	9	8	160	85	85	44	-51	1	34	39	-3
935	France	Femme	38	1	84	89	81	95	86	8	67	45	86	cadre et profession intellectuelle sup&#233rieure	6	77	PACS&#233	1	2	59	39	38	39	41	54	59	44	40	64	50	50	11	20	172	56	56	20	0	-9	-24	15	-13
938	France	Femme	53	1	3	4	0	2	4	2	1	2	2	profession interm&#233diaire	2	2	mari&#233	1	2	96	96	96	97	3	4	96	95	4	2	2	6	3	1	170	80	80	0	-4	2	2	1	-1
939	France	Femme	43	1	62	80	78	93	66	26	77		50	profession interm&#233diaire	4	72	mari&#233	1	2	77	50	27	50	29	59	76	40	33	37	33	35	9	17	158	57	57	27	-2	-8	-4	36	-30
940	France	Femme	30	2	74	76	50	50	50	17	77	25	0	&#233l&#232ve ou &#233tudiant	6	65	mari&#233	1	0	81	35	39	50	21	50	73	30	10	12	0	30	0	14	162			46	-30	-14	-2	43	-29
943	France	Femme	25	1	36	67	19	74	25	72	67	68	57	cadre et profession intellectuelle sup&#233rieure	5	69	PACS&#233	1	0	75	78	79	77	18	60	90	58	67	43	0	24	8	26	170	68	68	-3	-24	-18	24	32	-42
945	France	Femme	35	1	10	12	82	30	25	86	76	83	26	profession interm&#233diaire	4	83	c&#233libataire	2	0	50	50	50	50	20	19	77	90	7	8	56	54	13	13	160	58	62	0	2	0	-1	-13	1
947	France	Femme	26	2	1	0	0	1	84	0	27	27	20	cadre et profession intellectuelle sup&#233rieure	5	100	c&#233libataire	2	0	77	71	81	79	33	30	19	20	21	25	0	79	0	0	159	69	68	6	-79	0	-4	-1	3
949	France	Femme	40	2	50	80	81	69	59	37	63	50	50	profession interm&#233diaire	2	100	concubinage	1	2	82	29	30	20	20	50		37	16	28	1	4	50	68	165	63	61	53	-3	-18	-12		-30
951	France	Femme	53	1	98	100	0			77	77	97		ouvrier	2	100	c&#233libataire	2	1	50	38	38	34		77		36		66				66	163	66	69	12
953	France	Femme	38	2	100	100	100	100	100	100	100	100	100		2	100	concubinage	1	1	100	49	50	50	0	100	100	41	50	50	4	26	0	67	170	70	70	51	-22	-67	0	59	-100
954	France	Femme	32	2	15	16	16	20	52	15	12	18	15	profession interm&#233diaire	4	50	concubinage	1	0	50	42	50	50	4	15	97	91	88	89	12	26	7	9	160	68	69	8	-14	-2	-1	6	-11
955	France	Femme	49	1		23	15	14	29	86	22			profession interm&#233diaire	4	82	mari&#233	1	0	86	86	89	87	0	5	100	100	0	0	14	14	0	0	160	53	53	0	0	0	0	0	-5
957	France	Homme	35	2	72	61	61	62	63	20	16	68	0	cadre et profession intellectuelle sup&#233rieure	5	78	mari&#233	1	0	70	25	23	22		66		34	33	32	28	0			169	83	83	45	28		1
958	France	Homme	31	1	65	86	77	100	100	3	74	22	100	profession interm&#233diaire	4	95	mari&#233	1	1	50	50	50	50	50	57	50	42	67	70	21	39	50	50	175	65	65	0	-18	0	-3	8	-7
959	France	Femme	55	1	57	72	75	7	14	76	50	29		profession interm&#233diaire	4	100	c&#233libataire	2	0	97	19	27	23	7	50	100	50	18	50	1	78	9	8	160	43		78	-77	1	-32	50	-43
960	France	Femme	44	1	100	100	98	100	100	97	100	100	100	cadre et profession intellectuelle sup&#233rieure	5	85	mari&#233	1	2	100	0	0	0	0	65	100	21	3	63	0	0	3	88	160	60	60	100	0	-85	-60	79	-65
963	France	Femme	53	1	31	31	32	33	34	35	33	32	33	profession interm&#233diaire	2	85	mari&#233	1	2	76	77	67	67	50	50	50	50	50	50	50	50	11	13	160	84	84	-1	0	-2	0	0	0
964	France	Femme	40	1	86	86	86	67	57	92	86	69	69	profession interm&#233diaire	4	67	concubinage	1	0	100	0	32	18	33	78	82	100	86		10	85	64	100	160	62	58	100	-75	-36		-18	-45
966	France	Femme	47	2	96	78	8	0	79	29	84	97	9	ouvrier	2	67	concubinage	1	1	7	98	95	97		23	74	39	8	6	8	5	79	96	161	61	58	-91	3	-17	2	35
967	France	Femme	45	1	92	95	93	97		97	99	99	99	profession interm&#233diaire	5	76	mari&#233	1	3	68	41	50	50	72	73	75	24	47	81	50	42	60	95	170	81	81	27	8	-35	-34	51	-1
968	France	Femme	27	2	75	33	30	43	34	71	12	18	11	cadre et profession intellectuelle sup&#233rieure	5	87	concubinage	1	0	83	82	98	98											170	61	61	1
969	France	Femme	42	2		81	22	23	37	28	74	60	18	cadre et profession intellectuelle sup&#233rieure	4	92	mari&#233	1	2	84	63	63	66		63		29	65	79	24	9	29		160	55	53	21	15		-14
970	France	Femme	31	1	94	88	96	96	80	15	86	22	12	profession interm&#233diaire	4	18	concubinage	1	0	79	83	82	84	23	92	80	18	50	50	22	74	50	76	154	61	61	-4	-52	-26	0	62	-69
972	France	Femme	31	2	94	94	65	5	74	15	83	16	50	cadre et profession intellectuelle sup&#233rieure	6	61	PACS&#233	1	0	73	22	25	26	24	78	75	25	28	75	27	23	55	100	160	72	72	51	4	-45	-47	50	-54
973	France	Femme	24	2	0		1	72		80	0	77	50	&#233l&#232ve ou &#233tudiant	5	79	c&#233libataire	2	0	100	0	0	14	50		0	14	9	84	0	86	0	16	177	68	66	100	-86	-16	-75	-14
974	France	Femme	36	2	100	96	97	94	80	95	97	95	85	cadre et profession intellectuelle sup&#233rieure	5	78	PACS&#233	1	1	100	10	11	0	33	95		17	66	79	15	76	50	97	164	53	52	90	-61	-47	-13		-62
976	France	Femme	53	1	50	83	84	84	69	72	74	58	74	cadre et profession intellectuelle sup&#233rieure	6	83	mari&#233	1	2	50	66	65	66		64		32	50	50	50	29	50	64	167	69	71	-16	21	-14	0
977	France	Femme	22	2	59	100	71	98	50	50	89	50	74	&#233l&#232ve ou &#233tudiant	6	15	concubinage	1	0	66	99	52	98	42	74	82	49	20	22	2	17	3	22	158	52	51	-33	-15	-19	-2	33	-32
978	France	Femme	21	2	28	29	7	98	77	29	67	58	84	&#233l&#232ve ou &#233tudiant	2	77			0	93	68	94	50	50	63	50	50		66	4	6	50	50	178	69	67	25	-2	0		0	-13
979	France	Femme	29	1	64	64	71	98	34	99	100	100	71	profession interm&#233diaire	2	96	c&#233libataire	2	0	99	12	21	5	50	66	89	12	50	50	0	92	0	50	165	53	55	87	-92	-50	0	77	-16
981	France	Femme	49	2	78	85	20	77	50	99	41	50	78	cadre et profession intellectuelle sup&#233rieure	2	97	mari&#233	1	1	97	98	98	97	53	55	59	50	50	50	4	4	84	91	173	68	68	-1	0	-7	0	9	-2
983	France	Femme	40	2	68	67	75	29	50	50	50	50	21	cadre et profession intellectuelle sup&#233rieure	6	72	mari&#233	1	0	95	39	38	21	32	50	74	50	31	72	13	77	79	79	182	62	62	56	-64	0	-41	24	-18
984	France	Femme	20	2	95	89	28	95	72	67	50	27	3	ouvrier	2	0	concubinage	1	0	100	22	17	20	75	25	90	70	85	19	0	99	58	62	154	50	50	78	-99	-4	66	20	50
986	France	Homme	43	1	13	24	8	23	13	4	12	0	2	cadre et profession intellectuelle sup&#233rieure	5	72	PACS&#233		2	66	67	66	65	11	18	95	94	1	2	11	5	9	12	171	76	76	-1	6	-3	-1	1	-7
987	France	Homme	34	2	61	74	75	24	72	36	71	35	27	cadre et profession intellectuelle sup&#233rieure	4	71	PACS&#233	1	2	70	62	71	71	65	86	50	50	24	39	23	0	12	12	193	77	76	8	23	0	-15	0	-21
988	France	Femme	49	2	98									profession interm&#233diaire	2	97	c&#233libataire	2	2	99	99	99	99											161	47	47	0
989	France	Femme	33		79	62	0	58	66	86	41	83	33	ouvrier	2	0	autre		2	69	69	70	70	2	64	98	97	2	2	0	62	50	57	165	53	54	0	-62	-7	0	1	-62
990	France	Femme	34	1		75	20	100	100	50	65		76	profession interm&#233diaire	5	66	PACS&#233	1	2	73	73	100	70	24	69	100	63	50		19	0			163	63	63	0	19			37	-45
991	France	Femme	41	2	86	100	53	100	14	65	75	27	13	artisan, commer&#231ant ou chef d'entreprise	4	100	mari&#233	1	3	18	50	100	100	10	78	87	76	9	85	7	7	67	76	162	81	77	-32	0	-9	-76	11	-68
992	France	Homme	45	2	100	100	100	100	100	100	100	100	100	profession interm&#233diaire	2	62	PACS&#233	1	0	42	37	55	50	0	100	97	81	55	57	26	25	10	80	170	105	110	5	1	-70	-2	16	-100
993	France	Femme	23	2	25	38	88	50	70	93	17		86	ouvrier	4	84	c&#233libataire	2	0	94	22	35	50	19	50	78	50	50	50	1	75	3	4	161	59	60	72	-74	-1	0	28	-31
994	France	Femme	47	1	100	100	0	100	100	53	50	50	100	profession interm&#233diaire	4	50	PACS&#233	1	2	50	97	98	100	36	67	79	54	0	52	14	0	11	13	168	61	61	-47	14	-2	-52	25	-31
996	France	Femme	21	2	100	84	50	0	53	55	66	53		ouvrier	2	82	concubinage	1	0	16		17	61	29		78	50	14	14			0	73	175		66			-73	0	28
999	France	Femme	44	2	50	50	50	74	74	73	73	73	50	profession interm&#233diaire	4	80	concubinage	1		81	23	24	26	50	73	65	37	37	56	66	32	50	50	159	52	52	58	34	0	-19	28	-23
1000	France	Femme	44	2	81	100	72	55	50	79	80	65	0	cadre et profession intellectuelle sup&#233rieure	6	96	concubinage	1	2	91	80	82	84	70	90	50	66	25	27	10	16	50	65	164	60	60	11	-6	-15	-2	-16	-20
1001	France	Femme	62	2	69	62	33	71	63	62	63	39		cadre et profession intellectuelle sup&#233rieure	6	73	autre		2	53	54	54	57				28			15	27		69	165	65	69	-1	-12
1002	France	Femme	50	1	100	0	0	100	100	100	29	0	100		4	100	mari&#233	1	3	100	100	100	100	41	89	66	28	50	71	0	0	0	0	159	52	52	0	0	0	-21	38	-48
1006	France	Femme	36	2	64	99	97	100	100	5	74	32	70	cadre et profession intellectuelle sup&#233rieure	6	50	mari&#233	1	2	85	50	50	50	50	36	50	50	65	73	9	50	62	78	170	58	58	35	-41	-16	-8	0	14
1007	France	Femme	31	2	73	70	77	78	76	68	72	36	17	profession interm&#233diaire	4	66	mari&#233	1	2	68	31	29	31	50	50	73	27	29	45	12	14	39	66	158	69	68	37	-2	-27	-16	46	0
1008	France	Femme	56	2	97	50	1	4	50	18	23	84	5	artisan, commer&#231ant ou chef d'entreprise	6	98	autre		3	55	99	98	95	50	71	97	85	4	3	7	10	18	62	161	80	82	-44	-3	-44	1	12	-21
1009	France	Femme	38	2	67	63	32	31	50	50	74	69	95	profession interm&#233diaire	4	50	mari&#233	1	3	88	66	68	70	50	65	77	63	50	77	0	1	26	50	165	64	64	22	-1	-24	-27	14	-15
1010	France	Femme	37	2	73	76	92			3		7		profession interm&#233diaire	4	8	mari&#233	1	2	60	0	15	13	50	78	77	18			9	87	14	15	177	72	75	60	-78	-1		59	-28
1011	France	Femme	42	2	14	65	50	69	71	59	25	27	56	ouvrier	4	100	mari&#233	1	1	89	89	89	89	73	74	75	77	26	26	0	0	1	0	162	68	68	0	0	1	0	-2	-1
1012	France	Homme	32	2	60	61	50	100	50				65	ouvrier	2	83	c&#233libataire	2	0	50	0	32	50	32	30	50						1	0	175	175	61	50		1			2
1014	France	Femme	36	1	78	92	33	85	66	74	81	50	70	ouvrier	4	62	mari&#233	1	3	68	67	80	78			10	11	25	31	21	33			169	76	76	1	-12		-6	-1
1015	France	Femme	52	2	80	79	84	76						ouvrier	2	22	mari&#233	1	2	74	30	28	24	86	82									166	59	59	44					4
1016	France	Femme	30	2	82	79	14	82	18	40	69	79	7	profession interm&#233diaire	4	64	PACS&#233	1	0	99	27	23	23	34	50	89	50	50	50	5	69	1	32	170	90	92	72	-64	-31	0	39	-16
1017	France	Homme	41	1	56	21	77	20	61	64	29	22	5	cadre et profession intellectuelle sup&#233rieure	4	86	mari&#233	1	2	89	18	23	26	62	73	87	87	58	76	25	69	3	3	180	80	80	71	-44	0	-18	0	-11
1018	France	Femme	42	2	80	97	77		78	12	81	80	20	ouvrier	2	72	concubinage	1	3	95	2	3	3	25	83	83	78	84	9	7	97	10	77	163	49	47	93	-90	-67	75	5	-58
1019	France	Femme	22	1	27	74	100	0	50	100	50	76	0	&#233l&#232ve ou &#233tudiant	5	100	c&#233libataire	2	0	100	27	22	25	12	90	100	100	0	0	0	84	0	0	166	59	57	73	-84	0	0	0	-78
1020	France	Femme	35	1	100	90	24	92		20	84		78	cadre et profession intellectuelle sup&#233rieure	5		concubinage	1	1	71	73		73		75					1	0	68	86	162	52	54	-2	1	-18
1021	France	Femme	32	1	18	68	0	68	84	11	64	65		profession interm&#233diaire	4	58	c&#233libataire	2	0	100	24	84	79	0	12	100	93	100	88	0	23	0	0	167	61	62	76	-23	0	12	7	-12
1022	France	Femme	21	2		97	73	78	99	100	98	19	50	&#233l&#232ve ou &#233tudiant	5	86	concubinage	1	0	100	27	57	12	43	95	93	28	22	86	10	0	30	33	162	62	61	73	10	-3	-64	65	-52
1023	France	Femme	51	2	68	76				32	33			artisan, commer&#231ant ou chef d'entreprise	2	84	mari&#233	1	0	17	21	21	21							5	99			165	73	74	-4	-94
1024	France	Femme	45	1	67	100		81		18	66		18	profession interm&#233diaire	2	18	c&#233libataire	2	1	100	0	0	0	19	100	73	70	50	50	27	0	27	68	169	67	65	100	27	-41	0	3	-81
1026	France	Homme	31	2	79	75	70	70	13	65		66	19	artisan, commer&#231ant ou chef d'entreprise	2	77	c&#233libataire	2	0	82	33	39	37	13	17	85	61	0	0	14	66	0	0	170	60	60	49	-52	0	0	24	-4
1028	France	Homme	25	2	1	3	3	35	0	97	3	80	0	profession interm&#233diaire	4	97	PACS&#233	1	0	80	2	1	2	1	79	97	18	3	76	16	98	32	34	178	84	84	78	-82	-2	-73	79	-78
1030	France	Femme	52		62	88	90	90	91	16	83	74	69	cadre et profession intellectuelle sup&#233rieure	4	76	concubinage	1	0	93	63	85	84	21	88	92	27	18	20	11	12	21	50	173	79	77	30	-1	-29	-2	65	-67
1032	France	Femme	46	1	61	57	87	88	86	28	50	64	55	cadre et profession intellectuelle sup&#233rieure	5	70	PACS&#233	1	2	84	79	78	82	50	60	84	86	75	76	3	3			175	85	80	5	0		-1	-2	-10
1034	France	Femme	45	1	89	79	50	50	85	75	83	71	61	cadre et profession intellectuelle sup&#233rieure	4	96	mari&#233	1	3	72	73	78	78	31	29	74	37	73	25	16	18	17	92	174	88	86	-1	-2	-75	48	37	2
1035	France	Femme	39		61	75	69	100	78	72	61	57	71	ouvrier	2	77	c&#233libataire	2	0	85	74	77	77	39	70	38	23	10	22	24	24	25	27	163	80	79	11	0	-2	-12	15	-31
1037	France	Femme	42	2	100	100	100	100	0	54	79	50	50	profession interm&#233diaire	4	100	c&#233libataire	2	0	100	19	20	23	0	49	100	74	97	98	3	50	0	50	172	81	81	81	-47	-50	-1	26	-49
1038	France	Femme	28	2	68	70	21	100	65	0	65	100	76	cadre et profession intellectuelle sup&#233rieure	5	82	concubinage	1	0	100	100	100	100	0	99	100	70	0	33	0	0	0	26	157	53	49	0	0	-26	-33	30	-99
1039	France	Femme	39	1	50	50	21	41	69	58	27	81	27	cadre et profession intellectuelle sup&#233rieure	5	67	PACS&#233	1	2	75	81	82	83	29	64	81	61	20	66	5	1	57	57	160	55	55	-6	4	0	-46	20	-35
1040	France	Femme	20	1	91	98	97	97	95	11	97	11	27	&#233l&#232ve ou &#233tudiant	2	35	c&#233libataire	2	0	80	17	19	17	24	86	77	11	18	71	14	34	10	80	158	56	54	63	-20	-70	-53	66	-62
1042	France	Femme	22	2	1	3	34	61	84	21	3	97	79	&#233l&#232ve ou &#233tudiant	5	81	autre		0	38	96	94	94	61	11	97	97	98	21	97	1			158	36	39	-58	96		77	0	50
1043	France	Femme	50	2	52	57	43	92	25	83	50	77	32	cadre et profession intellectuelle sup&#233rieure	6	97	mari&#233	1	5	96	89	63	84	25	57	96	77	14	10	13	11	2	12	166	59	59	7	2	-10	4	19	-32
1044	France	Femme	31	2	79	86	62	62	69	91	79	78	12	cadre et profession intellectuelle sup&#233rieure	6	81	PACS&#233	1	0	92	9	17	17	15	29	87	55	14	60	11	30	52	83	157	60	61	83	-19	-31	-46	32	-14
1046	France	Homme	25	2	28	0	0	0	0	79	0	68	23	cadre et profession intellectuelle sup&#233rieure	5	100	c&#233libataire	2	0	67	68	40	68	62	62	60	65	20	22	0	0	50	50	182	67	67	-1	0	0	-2	-5	0
1047	France	Homme	44		71	75	34			22	65	66	35	cadre et profession intellectuelle sup&#233rieure	4	87	mari&#233	1	2	91	18	17	22					74	30	16	70	21	68	185	119	119	73	-54	-47	44
1048	France	Homme	50	2	0	0	0		0	100	0	100	0	profession interm&#233diaire	2	100	concubinage	1	6	71	17	50	50	50		82	83			0		0	0	180	96	96	54		0		-1
1049	France	Femme	44	2	73	74	76	78	77	80	81	75	17	profession interm&#233diaire	2	77	c&#233libataire	2	1	81	16	17	20		78	82	25	42		20	81	24	25	150	45	50	65	-61	-1		57
1050	France	Femme	46	2	76	75	50	21	1	50	50	62	2	cadre et profession intellectuelle sup&#233rieure	5	97	concubinage	1	0	97	50	37	38	3	25	99	63	50	50	0	50	2	2	165	66	66	47	-50	0	0	36	-22
1051	France	Femme	31	2	64	50	64	50	73	15	84	25	50	profession interm&#233diaire	2	69	concubinage	1	2	95	29	50	46	46	82	70	26	50	70	0	0	0	69	163	53	55	66	0	-69	-20	44	-36
1053	France	Femme	27	2	22	66	0	11	67	81	63	27	10	cadre et profession intellectuelle sup&#233rieure	5	78	PACS&#233	1	0	89	20	21	21	10	62	93	70	6	19	6	7	10	11	163	68	69	69	-1	-1	-13	23	-52
1054	France	Femme	49	2	88	100	100	100	100	13	100	0	100		2	100	mari&#233	1	2	100	47	47	47		95	100	4	14	78	23	13	0	80	160	66	63	53	10	-80	-64	96
1055	France	Femme	38	2	63	68	77	50	73	37	75	77	70	ouvrier	2	31	PACS&#233	1	3	50	50	50	50	50	82	50	50	50	77	27	32	77	79	164	60	62	0	-5	-2	-27	0	-32
1056	France	Femme	52	2	50	50	50	13	9	57	41	73	13	profession interm&#233diaire	4	81	PACS&#233	1	2	86	25	52	50					50	59	28	16						61	12		-9
1059	France	Homme	34	2	35	65	75	93	23	32	71	74	58	profession interm&#233diaire	4	100	concubinage	1	1	98	98	98	100	50	77	31	16	34	33	3	32	98	99	187	92	95	0	-29	-1	1	15	-27
1060	France	Femme	31	1	72	100	73	100	100	18	74	25	81	cadre et profession intellectuelle sup&#233rieure	6	70	autre		1	78	42	39	36	31	68	68	29	50		27	29	26	32	165	85	85	36	-2	-6		39	-37
1061	France	Femme	45	1	91	82	65	89	83	75	75	60	39	profession interm&#233diaire	2	86	concubinage	1	2	81	80	92	84	65	86	68	29	36	71	69	86	13	64	162	60	60	1	-17	-51	-35	39	-21
1063	France	Femme	48	1	50	50	100	100	100	4	100	100		cadre et profession intellectuelle sup&#233rieure	2	100	mari&#233	1	3	100	50	83	85	50	50	91	50	100	50	0	0	0	0	161	70	71	50	0	0	50	41	0
1064	France	Femme	36	2	29	74	75	100	87	20	73	25	58	profession interm&#233diaire	4	76	PACS&#233	1	2	67	83	83	88	26	74	79	30	74	78	22	0			156	64	64	-16	22		-4	49	-48
1065	France	Femme	46	2	36	50	50	68	67	25		38		cadre et profession intellectuelle sup&#233rieure	5	27	c&#233libataire	2	1	46	29	31	27		59	50	31		35		70		64	168	65	65	17				19
1068	France	Homme	29	2	64	76	14	99	74	35	72	36	74	cadre et profession intellectuelle sup&#233rieure	6	66	concubinage	1	0	86	55	84	62		61	63	41	40	39	32	12	19	24	181	92	88	31	20	-5	1	22
1069	France	Femme	58	1	77	79	72	82	81	19	69	20	64	profession interm&#233diaire	2	87	concubinage	1	1	50	26	66	64	50	60	68	33	38	50	50	69	23	64	162	59	60	24	-19	-41	-12	35	-10
1070	France	Femme	46	1	99	68	37	64	74	62	63	75	75	profession interm&#233diaire	4	100	mari&#233	1	2	100	3	0	1	9	50	79	28	10	82	12	0	50	66	160	55	54	97	12	-16	-72	51	-41
1073	France	Homme	48	1	78	78	82	77	98	97	77	65	76	ouvrier	2	92	mari&#233	1	2	50	13	50	50	50	78	66	25	64	86	22	50	17	50	172	78	78	37	-28	-33	-22	41	-28
1074	France	Femme	42	2	32	33	78	73	73	17		23	85	ouvrier	4	72	c&#233libataire	2	1	91	3	90	92	73	100	29	2			31	20	1	5	163	81	83	88	11	-4		27	-27
1075	France	Femme	29	2	59	71	62		77	49	69	42	59	profession interm&#233diaire	6	88	c&#233libataire	2	0	100	44	65	35	8	23	64	53	81	29	0	54	81	91	169	61	58	56	-54	-10	52	11	-15
1076	France	Femme	40	2	82	81	89	90	89	86	87	6	79	cadre et profession intellectuelle sup&#233rieure	4	32	mari&#233	1	1	100	16	16	32	31	61	74	17	32	73	25	56	67	66	171	69	67	84	-31	1	-41	57	-30
1079	France	Homme	45		9	83	83	89	98	0	86	17	13	profession interm&#233diaire	4	14	mari&#233	1	1	100	97	99	100	50	65	70	33	18	50	3	0	3	1	175	72	73	3	3	2	-32	37	-15
1081	France	Femme	37	2	85	89				25	83	63		cadre et profession intellectuelle sup&#233rieure	5	78	concubinage	1	2	100	100	100	99						87	4	100	63	81	160	58	58	0	-96	-18
1082	France	Femme	23	1	21	81	13	100	100	3	60	60	63		4	68	PACS&#233	1	0	64	81	94	100	50	50	65	59	75	77	16	16	50	50	163	90	90	-17	0	0	-2	6	0
1085	France	Femme	38	1	50	50	50	50	23	22	50	32	50	profession interm&#233diaire	4	64	mari&#233	1	2	98	80	81	82	44	46	50	50	50	50	11	34	50	50	165	54	54	18	-23	0	0	0	-2
1086	France	Femme	30	2	3	11	11	6	10	51	8	59	4	profession interm&#233diaire	4	75	c&#233libataire	2	0	83	15	21	14	15	22	69	46	12	13	9	98	0	2	183	71	71	68	-89	-2	-1	23	-7
1087	France	Homme	30	2	76	35	36	47	47	47	25	28	6	ouvrier	4	66	c&#233libataire	2	0	70	20	17	23	24		68	39	23	26	27	75			179	75	76	50	-48		-3	29
1088	France	Homme	42	1	10	13	22	16	2	36	3	2	10	cadre et profession intellectuelle sup&#233rieure	6	66	PACS&#233	1	2	81	26	29	38			36	40	33	35	14	72	5	5	184	88	88	55	-58	0	-2	-4
1089	France	Femme	32	1	50	50	50	50	70	70	42	50	73	profession interm&#233diaire	5	76	concubinage	1	0	77	79	80	81	50	50	50	50	50	50	50	50	50	68	167	85	85	-2	0	-18	0	0	0
1090	France	Femme	25	2	16	17	0	28	6	33	7	63	10	profession interm&#233diaire	4	66	concubinage	1	0	47	78	85	85	50	35	50	62	50	32	25	37	5	5	168	60	60	-31	-12	0	18	-12	15
1091	France	Homme	55	2	69	76	17	68	66	32	50	50	50	cadre et profession intellectuelle sup&#233rieure	6	76	c&#233libataire	2	0	78	36	70	39	22	50	64	50	14	26	22	50	12	32	176	85	85	42	-28	-20	-12	14	-28
1092	France	Femme	44	2	97	75	77			36	74	74			2	71	mari&#233	1	2	40	18	40	42		57		57		59	20	22	24	96	158	84	85	22	-2	-72
1093	France	Femme	26	2	52	76	53	98	71	67	50	68	66	&#233l&#232ve ou &#233tudiant	2	80	autre		0	100	0	0	0	4	72	100	18	0	80	0	100	50	50	160	69	67	100	-100	0	-80	82	-68
1094	France	Femme	42	1	31	41	42	77	62	27	70	27	13	profession interm&#233diaire	5	86	mari&#233	1	3	93	25	26	95	5	76	87	63	13	16	15	93	7	7	168			68	-78	0	-3	24	-71
1095	France	Femme	42	1	74	78	75	78	67	66	50	50	50	profession interm&#233diaire	4	57	PACS&#233	1	2	82	83	87	83	25	56	49	50	50	50	23	29	0	6	165	62	61	-1	-6	-6	0	-1	-31
1096	France	Femme	25	2	19	17	0	0	100	1	12	58	0	profession interm&#233diaire	4	67	PACS&#233	1	0	98	31	50	30	81	76	37	37	0	0	2	0	8	13	160	92	90	67	2	-5	0	0	5
1098	France	Femme	20	2	65	67	3	80	57	38	68	31	39	profession interm&#233diaire	2	24	c&#233libataire	2	0	75	5	12	12	50	71	50	24	50	78	50	70	50	50	160	72	72	70	-20	0	-28	26	-21
1099	France	Femme	33	1	12	11	2	6	12	99	2	93	7	cadre et profession intellectuelle sup&#233rieure	5	0	PACS&#233	1	1	97	72	66	100	6	9	92	91	17	20	4	4	4	18	170	64	64	25	0	-14	-3	1	-3
1101	France	Homme	24	2	25	57	0	100	26	100	24	77	0	&#233l&#232ve ou &#233tudiant	5	100	concubinage	1	0	80	100	43	100	59	79	68	56	18	39	22	50	0	6	175	68	67	-20	-28	-6	-21	12	-20
1105	France	Homme	40	1		50	67	71	64	100	50	50	30	ouvrier	4	85	PACS&#233	1	2	79	6	73	73	28		72	71	31	32	34	83	50		169	69	69	73	-49		-1	1
1107	France	Femme	37	1	32	28	23	50	75	90	34	67	50	cadre et profession intellectuelle sup&#233rieure	6	50	mari&#233	1	2	50	50	50	50	50	50	50	50	50	50	50	50	8	8	160	70	70	0	0	0	0	0	0
1111	France	Femme	28	2	10	21	1	0	12		12		0	cadre et profession intellectuelle sup&#233rieure	5		c&#233libataire	2	0	87	66	82	71							0	50	0	0	166	54	54	21	-50	0
1112	France	Femme	47	2			63	67	88	64	67	70	70	profession interm&#233diaire	5	72	autre		1	79	67	69	74		79	35	32	57	62	22	22			183	92	95	12	0		-5	3
1113	France	Femme	60	1	28	27	16	41	50	50	16	50	9	cadre et profession intellectuelle sup&#233rieure	6	72	autre		3	74	75	75	76	50	50	50	50	50	50	50	50	50	50	159	56	56	-1	0	0	0	0	0
1115	France	Femme	28	1	100	75	0	100	0	81	57	84	0	&#233l&#232ve ou &#233tudiant	4	100	concubinage	1	0	100	100	100	100	50	50	50	50	12	11	4	55	0	50	163	52	54	0	-51	-50	1	0	0
1117	France	Femme	22	1	88	79	82	100	75	6	73	100	29	ouvrier	2	70	c&#233libataire	2	0	100	20	100	100	8	0	100	67	0	64	0	0			160	50	50	80	0		-64	33	8
1118	France	Femme	55	1	59	37	36	62	38	86	18	68	25	cadre et profession intellectuelle sup&#233rieure	6	81	mari&#233	1	3	100	33	27	23	1	22	84	77	14	31	0	2	23	35	170	72		67	-2	-12	-17	7	-21
1120	France	Homme	48	1	38	37	20	54	62	22	24	39	36	cadre et profession intellectuelle sup&#233rieure	5	84	mari&#233	1	2	39	65	62	65	43	40	69	60	57	68	31	15	25	32	169	64	64	-26	16	-7	-11	9	3
1122	France	Femme	39		72	77	66	84	68	73	61	39	24	profession interm&#233diaire	4	29	autre		2	43	50	50	50	49	50	62	50	50	50	3	19						-7	-16		0	12	-1
1125	France	Femme	43	2	100	100	100		50	7	100	55		artisan, commer&#231ant ou chef d'entreprise	4	100	concubinage	1	1	99	50	50	54	0	50	100	4	2	50	2	74	14	83	172	80	81	49	-72	-69	-48	96	-50
1134	France	Femme	47	2	26	66	69	98	27	73	80	76	16	profession interm&#233diaire	2	69	mari&#233	1	2	100	8	31	4	35	33	62	38	72	35	7	88	4	72	160	61	62	92	-81	-68	37	24	2
1135	France	Femme	42	1		75	23	89	70	20	79	10	13	cadre et profession intellectuelle sup&#233rieure	6	84	mari&#233	1	2	89	18	19	20	68	57	50	24	64	84	10	35	64	64	170	63	63	71	-25	0	-20	26	11
1136	France	Femme	23	2	100	100	100	100	100	80	100	33	54	profession interm&#233diaire	2	80	concubinage	1	0	100	0	0	0	1	100	100	0	0	0	0	100	0	100	174	62	61	100	-100	-100	0	100	-99
1137	France	Femme	21	1	62	66	14	100	81	8	82	66	80	profession interm&#233diaire	4	0	concubinage	1	0	49	0	0	0	0	69	0	0	0	66	0	0			171	58	58	49	0		-66	0	-69
1138	France	Homme	43	1	62		29		28	76	67	45	50	cadre et profession intellectuelle sup&#233rieure	6	84	mari&#233	1	4	97	96	97	98	73	76								66	178	79	79	1					-3
1139	France	Femme	31	2	72	79	17	0		50		59	0	&#224 la recherche d'un emploi	4	98	PACS&#233	1	0	18	90	88	92		14		50		18	12	11	79	77	163	62	60	-72	1	2
1141	France	Femme	50	1	26	27	23	33	30	75	30	28	30	profession interm&#233diaire	4	50	concubinage	1	1	86	85	85	88	50	50	50	50	50	50	22	19	50	50	163	55	58	1	3	0	0	0	0
1144	France	Femme	55	1	58	57	8	48					12	cadre et profession intellectuelle sup&#233rieure	5	74	autre		3	96	75	79	77	7	6	61				2	3			168	52	53	21	-1				1
1146	France	Femme	43	2	88	84	50	71	23	82	75	76	17	profession interm&#233diaire	4	87	mari&#233	1	3	96	4	6	8	100	50	88	18	20	56	13	50	50	80	165	77	79	92	-37	-30	-36	70	50
1147	France	Homme	43	2	70	50			1	50			3	cadre et profession intellectuelle sup&#233rieure	5	96	mari&#233	1	3	97	96	99	97	50										169	71	73	1
1148	France	Femme	26	2	80	69	50	71				80	100	cadre et profession intellectuelle sup&#233rieure	6	100	concubinage	1	0	84	28	19	1	50	69	75	24			5	21	78	77	173	80	80	56	-16	1		51	-19
1149	France	Femme	40	1	100	80	20	100	75	14	69	24	50	profession interm&#233diaire	4	24	concubinage	1	0	85	50	28	22	50	72	50	50	70	70	20	86	24	67	165	65	67	35	-66	-43	0	0	-22
1150	France	Homme	30	1	69	52	37	64	64	34	50	50	50	cadre et profession intellectuelle sup&#233rieure	5	34	c&#233libataire	2	0	67	69	91	74									14	60	183	82	79	-2		-46
1151	France	Femme	26	1	67	60	13	63	32	71	39	37	28	ouvrier	2	75	concubinage	1	0	97	3	5	3			74	21	72	23	3	99	45	30	157	45	45	94	-96	15	49	53
1152	France	Homme	60	2	50	82	18	50	50	100	65	50	50	cadre et profession intellectuelle sup&#233rieure	5	50	mari&#233	1	5	50	50	50	50	50	78	64	64	50	50	50	51	29	50	180	72	74	0	-1	-21	0	0	-28
1154	France	Femme	35	2	23	83	69	18	57	84	66	62	2	cadre et profession intellectuelle sup&#233rieure	5	98	PACS&#233	1	0	75	100	100	100	25	66	64	31	18	18	0	9	25	23	180	65	65	-25	-9	2	0	33	-41
1155	France	Femme	49	2	77	61	50	72	50	50	67	50	50	profession interm&#233diaire	5	50	autre		0	54	50	50	50	85	50	50	50	50	50	77	50	50	89	170	63	63	4	27	-39	0	0	35
1156	France	Femme	43	2	79	77	50	80	27	40	68	68	50	profession interm&#233diaire	4	79	mari&#233	1	1	71	78	79	81	50	50	71	50	72	80	22	23	35	67	165	70	69	-7	-1	-32	-8	21	0
1159	France	Homme	47	2	13	10	5	83	10	7	4	87	12	ouvrier	2	21	c&#233libataire	2	3	100	100	100	99	18	17	83	82	60	65	8	8	7	8	185	78	78	0	0	-1	-5	1	1
1160	France	Femme	26	1	74	75	75	100	72	78	86	75	50	profession interm&#233diaire	4	100	concubinage	1	0	100	20	18	26	50	83	88	24	63	90	10	82	0	50	165	80	80	80	-72	-50	-27	64	-33
1161	France	Homme	49	2	71	0	18		0	78	46	53	20	cadre et profession intellectuelle sup&#233rieure	5	62	autre		3	82	80	84	82	63	54	0	37	75	32	25	47	18	64	170	69	70	2	-22	-46	43	-37	9
1162	France	Femme	41	2	74	72	85	65	100	0	79	23		cadre et profession intellectuelle sup&#233rieure	4	92	PACS&#233	1	2	95	7	8	9	73	78	49	7	90	8	18	90	42	80	165	72	75	88	-72	-38	82	42	-5
1163	France	Femme	30	2	32	70	14	80	0	79	6	73	0	profession interm&#233diaire	5	79	concubinage	1	0	91	73	74	75	0	11	100	92	50	50	6	19	58	76	184	76	77	18	-13	-18	0	8	-11
1164	France	Femme	39	1	77	77	82	89	24	78	89	75	22	profession interm&#233diaire	4	83	mari&#233	1	1	85	84	50	50	21	19	80	50	19	50	20	20	50	83	160	57	57	1	0	-33	-31	30	2
1166	France	Femme	41	2	98	100	96	100	100	5	100	2	95	profession interm&#233diaire	1	94	concubinage	1	3	99	1	6	0	66	98	73	0	50	100	2	32	75	100	165	102	100	98	-30	-25	-50	73	-32
1168	France	Homme	47		25	75	71	67	92		16	68	83	cadre et profession intellectuelle sup&#233rieure	6	100	c&#233libataire	2	2	87	91	91	90	58	85			72	76	6	8	0	0	178	85	86	-4	-2	0	-4		-27
1170	France	Homme	31	2	50	89	100	100	100	0	21	0	100	profession interm&#233diaire	4	91	concubinage	1	0	84	19	17	5	14	50	100	5	79	7	0	0	0	0	178	82	76	65	0	0	72	95	-36
1171	France	Homme	62	2	67	63		68						cadre et profession intellectuelle sup&#233rieure	6	92	c&#233libataire	2	2	50	63	64	68				29		28	23	81		67	180	85	87	-13	-58
1174	France	Femme	37	2	65	67	34	84	69	29	68	50	63	profession interm&#233diaire	4	62	PACS&#233	1	3	78	33	67	67							18	29	29	50	163	68	68	45	-11	-21
1175	France	Femme	39	1	70	89	11	92	7	85	26	84	84	cadre et profession intellectuelle sup&#233rieure	5	81	PACS&#233	1	2	85	75	96	96	50		97	50	2	50	3	3	1	17	165	69	70	10	0	-16	-48	47
1176	France	Femme	34	2	71	100	88	70	68	19	90	30	12	profession interm&#233diaire	4	91	mari&#233	1	4	89	14	18	28	12	82	85	90	71	86	12	88	62	74	168	84	82	75	-76	-12	-15	-5	-70
1177	France	Femme	47	1	48	20	3	97	65	70	11	70	25			2	mari&#233	1	3	97	96	98	99	9	6	91	92	5	14	0	1	1	2	166	53	53	1	-1	-1	-9	-1	3
1180	France	Femme	37	2	66	95	91	92	50	10	94	16	27	ouvrier	4	72	mari&#233	1	3	85	50	50	50	34	60	76	38	50	80	15	75	50	75	166	70	70	35	-60	-25	-30	38	-26
1181	France	Femme	47	1	88	93	83	97	83	24	71	50	50	profession interm&#233diaire	2	77	PACS&#233	1	3	66	76	80	80	50	67	50	50	74	97	24	1	14	17	170	90	90	-10	23	-3	-23	0	-17
1182	France	Femme	36	2	93	93	91			93		90		profession interm&#233diaire	4	87	mari&#233	1	2	98	11	11	20		91		13		94	12				168	77	77	87
1183	France	Homme	45	1	47	50	0	2	4	97	2	98	4	ouvrier	1	98	c&#233libataire	2	0	98	2	50	50	50	50	50	50	50	50	50	50	50	50	185	83	100	96	0	0	0	0	0
1185	France	Femme	43	1	4		5	77	3	2	2	98	2	cadre et profession intellectuelle sup&#233rieure	6	98	concubinage	1	3	50	98	98	98	2	18	98	84	50	50	4	4	1	3	163	54	54	-48	0	-2	0	14	-16
1186	France	Homme	44	2	95	94	96	36	87	87	86	92	50	artisan, commer&#231ant ou chef d'entreprise	2	95	PACS&#233	1	1	76	19	20	24	48	50	50	50	70	68	50	31	85	86	178	81	83	57	19	-1	2	0	-2
1187	France	Homme	36	2			81	50		8		8		ouvrier	2	69	c&#233libataire	2	2	79	7	21	22	28	74	65	22			11	93			183	95	100	72	-82			43	-46
1189	France	Femme	38	1	72	74	0	98	50	71	75	76	5	profession interm&#233diaire			concubinage	1	0	79	22	25	22	23	76	77	21	22	78	20	22	0	53	165	72	68	57	-2	-53	-56	56	-53
1190	France	Femme	64	1	70	99	69	97	93	29	67	50	96	profession interm&#233diaire	4	70	autre		0	92	94	70	74	50	50	50	50	50	50	13	16	14	85	167	64	65	-2	-3	-71	0	0	0
1191	France	Femme	26	1	63	74	31	12	32	28	69	54	7	cadre et profession intellectuelle sup&#233rieure	6	85	concubinage	1	0	100	100	87	98	50	63	50	45	54	54	100	98	97	98	170	58	58	0	2	-1	0	5	-13
1192	France	Femme	20	2	65	50	0	0						profession interm&#233diaire	4	100	c&#233libataire	2	0	100	100	100	100			97	100			0	47	87	100	168	51	51	0	-47	-13		-3
1195	France	Homme	30	1	60	79		79			55	64		&#233l&#232ve ou &#233tudiant	5	65	c&#233libataire	2	0	100	100	100	100					50	65	73	33			171	75	78	0	40		-15
1197	France	Femme	62	2			25	68						profession interm&#233diaire	2	66	mari&#233	1	2	82	41	39	39		63	69	37			19	66			163	60	60	41	-47			32
1198	France	Femme	44	2	50	61	50	50	50	88	50	86	19	profession interm&#233diaire	5	100	mari&#233	1	2	84	83	86	86	50	50	76	77	50	50	0	0	17	50	163	62	60	1	0	-33	0	-1	0
1200	France	Femme	39	2	98	88	81	100	100	0	99	3	85	profession interm&#233diaire	4	81	PACS&#233	1	1	100	26	87	91	21	92	96	7	13	90	8	91	79	99	168	57	57	74	-83	-20	-77	89	-71
1201	France	Homme	44	2	22	65	16	16		71	89	76	20	cadre et profession intellectuelle sup&#233rieure	5	79	mari&#233	1	2	70	39	47	50	39	38	62	63	32	35	50	57	9	11	191	90	89	31	-7	-2	-3	-1	1
1202	France	Femme	22	2	84	85	19	0	13	50	81	57	92	ouvrier	2	90	c&#233libataire	2	0	86	34	50	70	24	26	57	30	29	62	0	67	31	16	160	55	55	52	-67	15	-33	27	-2
1205	France	Homme	24	2	25	74	58	5	68	23	62	62	68	cadre et profession intellectuelle sup&#233rieure	5	67	c&#233libataire	2	0	30	23	27	28	36	50	25	0	53	40	36	70	63	65	173	60	59	7	-34	-2	13	25	-14
1207	France	Femme	39	2	100	100	100	50	82	84	100	100	50	ouvrier	2	100	mari&#233	1	2	97	25	50	50	0	71	100	100	1	75	4	100	17	71	160	62	64	72	-96	-54	-74	0	-71
1208	France	Femme	41	1	64	66	75	50	50	77	50	50	50	cadre et profession intellectuelle sup&#233rieure	6	68	mari&#233	1	1	97	50	74	77	50	50	76	62	57	50	3	32	13	22	165	72	72	47	-29	-9	7	14	0
1209	France	Femme	37	2	50	29	25		67	50	19	74	64	profession interm&#233diaire	4	75	c&#233libataire	2	2	63	69	79	69	34	35	71	50	20	22	22	20	50	50	175	70	69	-6	2	0	-2	21	-1
1212	France	Femme	50	2	98	94	85	85	50	82	90	82	50	profession interm&#233diaire	2	79	mari&#233	1	3	95	14	13	13	16	89	90	15	14	50	7	88	24	87	160	70	72	81	-81	-63	-36	75	-73
1213	France	Femme	27	2	66	63	50	3	34	50	66	63	52	profession interm&#233diaire	4	65	mari&#233	1	0	81	5	5	8	13	66	83	20	65	31	7	90	27	60	172	77	78	76	-83	-33	34	63	-53
1214	France	Femme	32	2	100	58		100	67	36	70	83	50		4	80	c&#233libataire	2	0	100	75	74	79	2	38	92	79	23	21	0	0	8	81	145	49	47	25	0	-73	2	13	-36
1215	France	Femme	49	2	100	86	96	99	74		73		83	profession interm&#233diaire	4	98	c&#233libataire	2	1	100	17	28	31		64				68	9			72	165	75	79	83
1217	France	Femme	53	1	48	100	66	66	74	30	50	50	50	cadre et profession intellectuelle sup&#233rieure	5	98	concubinage	1	2	94	50	93	95	25	80	18	50	50	80	50	77	19	73	173	70	70	44	-27	-54	-30	-32	-55
1218	France	Femme	28	2	100	100	65	43	72	50	78	68	4	&#224 la recherche d'un emploi	2	100	PACS&#233	1	3	100	68	60	70	29	78	98	64	35	37	48			69	168	80	71	32			-2	34	-49
1219	France	Femme	57	2	100	100	1	100	52	0	100	50	50	profession interm&#233diaire	2	100	mari&#233	1	0	50	50	50	50	48	76	50	74	50	50	1	50	24	10	170	80	80	0	-49	14	0	-24	-28
1220	France	Femme	32	2	63	65	53	50	31		67	50	50	&#224 la recherche d'un emploi	4	72	mari&#233	1	2	81	29	31	76	48	50									160	75	72	52					-2
1222	France	Femme	32	1	2	32	40	81	17	30	28	75	63	cadre et profession intellectuelle sup&#233rieure	6	18	mari&#233	1	2	77	29	28	22	23	50	71	31	50	50	22	77	11	8	167	60	60	48	-55	3	0	40	-27
1223	France	Homme	64	2	87	50	50	2	69	70	71	50	2	retrait&#233	2	50	mari&#233	1	1	100	3	20	32	0	19	98	25	21	22	14	30	35	100	183	88	89	97	-16	-65	-1	73	-19
1224	France	Homme	23	2	26	25	69	25	25	28	27	21	24	cadre et profession intellectuelle sup&#233rieure	6	75	c&#233libataire	2	0	82	32	16	22	22	23	74	32	27	25	16	77	54	54	188	75	75	50	-61	0	2	42	-1
1225	France	Femme	44	2	74	93	88	90	99	79	98	93	92	profession interm&#233diaire	4	95	PACS&#233	1	1	75	43	63	14	69	25	71	15	71	69	4	28	4	12	164	56	56	32	-24	-8	2	56	44
1227	France	Homme	21	2	26	62	61	0	0	50	26	50	4	&#233l&#232ve ou &#233tudiant	5	70	c&#233libataire	2	0	80	27	24	82							0	100	0	0	178	81	79	53	-100	0
1228	France	Homme	28	1	61	57	50	77	50	50	50	50	50	&#233l&#232ve ou &#233tudiant	5	73	c&#233libataire	2	0	55	36	37	45	50	50	61	50	27	57	17	34	21	23	175	70	70	19	-17	-2	-30	11	0
1230	France	Femme	34	2	100	100	0	100	100	67	100	28	76	cadre et profession intellectuelle sup&#233rieure	5	28	mari&#233	1	1	100	63	66	67	50	76	80	33	50	68	0	17	29	87	168	65	62	37	-17	-58	-18	47	-26
1231	France	Femme	29	2	78	87	82	87		89	78		26	profession interm&#233diaire	2	76	c&#233libataire	2	0	78	30	75	26	26	73	86	74	87	35	18	77	68	76	166	88	86	48	-59	-8	52	12	-47
1232	France	Femme	32	1		100	17	100	80	22	73	22	92	cadre et profession intellectuelle sup&#233rieure	6	84	mari&#233	1	0	75	65	67	67	68	81	15	9	67	75	6	0			163	58	56	10	6		-8	6	-13
1236	France	Femme	56	2	100	96	100	0	28	0	100	54	0	profession interm&#233diaire	2	19	PACS&#233	1	1	100	0	0	28	0	78	99	50	24	58	0	90	0	95	164	80	80	100	-90	-95	-34	49	-78
1238	France	Femme	38	2	95	100	100	100	100	50	100	98	82	artisan, commer&#231ant ou chef d'entreprise	2	100	mari&#233	1	2	100	2	0	0	50	96	100	1	50	78	4	100	50	74	161	59	61	98	-96	-24	-28	99	-46
1243	France	Femme	24	1	85	84	57	85			70	39		profession interm&#233diaire	4	72	c&#233libataire	2	0	76	50	50	50	0	78	74	50	2	24	3	62	50	50	168	56	56	26	-59	0	-22	24	-78
1244	France	Femme	30	1	50	31	92	80	63	26	35	28	73	profession interm&#233diaire	4	75	c&#233libataire	2	2	20	50	75	74	20	50	87	88	19	20	8	22	32	30	158	56	56	-30	-14	2	-1	-1	-30
1245	France	Homme	43	2	0	0	0	0	0	0	0	0	0	cadre et profession intellectuelle sup&#233rieure	5	75	PACS&#233	1	0	39	63	42	41	41	43	39	43	43	42	31	72	0	0	180	78	78	-24	-41	0	1	-4	-2
1246	France	Homme	32	2	73	79	50	66	71	75	70	80	12	profession interm&#233diaire	2	68	c&#233libataire	2	0	75	35	40	37	52	50	72	36	50	50	21	64	35	61	178	65	66	40	-43	-26	0	36	2
1248	France	Femme	49	2	92	92	94	7	82	81	88	80	9	profession interm&#233diaire	2	85	mari&#233	1	2	100	50	50	50	50	75	74	27	70	87	50	72	22	82	171	57		50	-22	-60	-17	47	-25
1249	France	Homme	62	2	57	57	58		2	82	39	75		retrait&#233	2	2	mari&#233	1	3	90	79	78	80									50	50	180	130	127	11		0
1251	France	Femme	31	2	54	14	15	13		81	43	100	12	cadre et profession intellectuelle sup&#233rieure	4	63	PACS&#233	1	0	100	77	72	90	3	69	100	88	34	34	2	23	0	0	162	52	52	23	-21	0	0	12	-66
1252	France	Femme	40	1	90	90	80	96	70	12	81	17	60	profession interm&#233diaire	2	96	PACS&#233	1	1	93	93	92	92		68		29					74	90	169	71	71	0		-16
1253	France	Femme	31	1	21	22	38	66	0	50	23	50	26	cadre et profession intellectuelle sup&#233rieure	6	77	PACS&#233	1	1	97	79	70	81	17	30	87	83	19	50	2	80	3	3	163	60	60	18	-78	0	-31	4	-13
1255	France	Femme	44	2	83	91	82		89	50	78	50		profession interm&#233diaire	4	50	mari&#233	1	2	86	71	31	74	18	52	89	50	15	51	5	71	11	77	158	73	78	15	-66	-66	-36	39	-34
1256	France	Femme	66	2	50					11	41		2	cadre et profession intellectuelle sup&#233rieure	5	65	mari&#233	1	1	52	24	24	28								70	50	59	158	60	62	28		-9
1258	France	Femme	35	2	72	88	100		100	75	63	20		&#224 la recherche d'un emploi	2	100	mari&#233	1	1	100	0	0	0	25	97	83	0	19	68	2	32	8	89	168	58	57	100	-30	-81	-49	83	-72
1259	France	Femme	61	2	72	73	74	34	70	17	84	68	33	retrait&#233	4	80	c&#233libataire	2	1	84	70	63	68	42	67	49	24	43	47	27	37	31	64	162	74	76	14	-10	-33	-4	25	-25
1260	France	Femme	42	2	93	100	74	99	93	75	89	78	81	profession interm&#233diaire	4	74	mari&#233	1	2	85	20	25	67	13	83	87	37	36	66	12	7	50	50	156	68	70	65	5	0	-30	50	-70
1261	France	Homme	61	2	77	78	16	15	69	68	53	50	16	ouvrier	2	50	mari&#233	1	2	78	50	79	80	30	50	50	32	1	4	3	8	50	50	172	83	80	28	-5	0	-3	18	-20
1263	France	Femme	44	2	77	84	81	15	77	84	81	80	55	profession interm&#233diaire	4	77	concubinage	1	4	83	30	26	100	74	51	78	24	90	15	15	38	23	72	176	129	130	53	-23	-49	75	54	23
1264	France	Homme	48	1	73	60	23	74	34	23	8	34	72	profession interm&#233diaire	4	78	c&#233libataire	2	0	75	21	21	30	30	29	77	76	35	34	20	70	0	2	185	140	140	54	-50	-2	1	1	1
1266	France	Homme	34		69	74	50	50	4	63	50	50	6	artisan, commer&#231ant ou chef d'entreprise	2	84	c&#233libataire	2	0	100	50	50	50	50	50	78	50	74		5	50	5	29	182	58	61	50	-45	-24		28	0
1267	France	Homme	34	1	47	67			74	21	64	20	74	cadre et profession intellectuelle sup&#233rieure	5	70	c&#233libataire	2	0	80	30	37	37		69	60	25		68	25	24	23	26	170	59	60	50	1	-3		35
1268	France	Femme	40	1	27	75	81	82	64	64	66	66	66	cadre et profession intellectuelle sup&#233rieure	6	97	mari&#233	1	2	76	50	80	79	27	50	74	24	23	96	3	3	50	50	169	78	78	26	0	0	-73	50	-23
1269	France	Homme	26	1	6	23	25	25	38	38	58	70	16	&#233l&#232ve ou &#233tudiant	6	32	c&#233libataire	2	0	83	67	64	36	16	65	27	40	19	20	32	22	13	12	183	73	73	16	10	1	-1	-13	-49
1272	France	Homme	25	2	57	58	17	1	62	65	69	70	0	&#224 la recherche d'un emploi	5	74	c&#233libataire	2	0	100	19	18	19	73	85	57	52	23	36	30	99	20	19	180	65	65	81	-69	1	-13	5	-12
1273	France	Femme	53	2	100	98	100	3	3	100	100		1	ouvrier	2	100	mari&#233	1	1	100	4	72	3	100	100	3	54	3	5	15	100	1	100	160	70	75	96	-85	-99	-2	-51	0
1275	France	Femme	29	1	84	89	96	89	80	17	79	29	73	profession interm&#233diaire	4	87	c&#233libataire	2	0	50	9	20	17	41	82	61	20	50	78	33	85	50	73	178	53	54	41	-52	-23	-28	41	-41
1276	France	Femme	38	2	70	100	71	100	100	0	70	24	90	profession interm&#233diaire	5	85	concubinage	1	2	73	25	48	46	72	78	32	76	45	40	28	0	58	79	163	70	70	48	28	-21	5	-44	-6
1277	France	Femme	51	2	71	65	12		13	20	68	50	39	cadre et profession intellectuelle sup&#233rieure	5	85	mari&#233	1	1	98	87	91	91	24	24	72	50	65	92	18	27	48	57	172	62	63	11	-9	-9	-27	22	0
1278	France	Femme	59	1	50	50	50	72	75	74	21	17	50	profession interm&#233diaire		99	mari&#233	1	2	98	98	96	98	34	33	97	97	3	0	2	3	3	1	168	67	66	0	-1	2	3	0	1
1280	France	Femme	25	2	69	74	66	70	79	27	74	51	71	&#233l&#232ve ou &#233tudiant	6	90	c&#233libataire	2		50	9	4	8	50	68	76	50	75	91	27	69	65	65	165	72		41	-42	0	-16	26	-18
1281	France	Femme	49	2	100	100	74	58	100	14	100	16	100	profession interm&#233diaire	4	96	mari&#233	1	2	77	21	1	1	64	100	50	13	16	63	13	94	50	82	163	90	90	56	-81	-32	-47	37	-36
1282	France	Femme	49	2	67	67	27	9	21	50	50	72	0	cadre et profession intellectuelle sup&#233rieure	5	67	mari&#233	1	1	70	30	30	32	50		50	25	50	50	25	62	50	66	160	55	55	40	-37	-16	0	25
1283	France	Femme	32	2	73	100	99		99	7	99	99		ouvrier	2	91	c&#233libataire	2	0	81	16	22	20	33	99	68	17			25	100	22	63	165	110	114	65	-75	-41		51	-66
1286	France	Femme	30	1	73	68	66	67		46	73	71	51	profession interm&#233diaire	4	83	PACS&#233	1	1	73	33	36	34	37	63	71	50	66	76	31	29	0	3	156	50	50	40	2	-3	-10	21	-26
1287	France	Femme	28	1	65	72	95	79	38	29	73	27	57	ouvrier	2	27	PACS&#233	1	0	75	50	50	50	28	61	70	35	74	50	19	67	50	50	162	58	57	25	-48	0	24	35	-33
1288	France	Homme	30	2	14	29	28	29	30	50	51	50	5	cadre et profession intellectuelle sup&#233rieure	5	67	c&#233libataire	2	0	74	48	50	52	16	57	81	36	19	18	15	34	31	50	180	70	70	26	-19	-19	1	45	-41
1289	France	Homme	33	1	35	64	9	66	31	76	57	82	14	cadre et profession intellectuelle sup&#233rieure	6	85	mari&#233	1	2	91	91	91	90	34	35	50	50	50	50	0	1	21	20	182	63	64	0	-1	1	0	0	-1
1290	France	Femme	44	2	76	79	80	83	86	13	87	27	87	profession interm&#233diaire	5	72	mari&#233	1	2	76	22	47	50	24	6	75	50	23	50	16	86	50	53	162	59	59	54	-70	-3	-27	25	18
1291	France	Homme	33	2	100	100	84	71	87	3	87	14	1	profession interm&#233diaire	4	19	mari&#233	1	1	50	50	50	32	0	68	100	37	25	50	16	0	17	78	174	81	81	0	16	-61	-25	63	-68
1293	France	Femme	35	1	82	82	79	79	85	0	72	80	72		2	21	c&#233libataire	2	0	21	25	65	34	74	77	30	28	74	75	30	28	86	84	165	96	97	-4	2	2	-1	2	-3
1296	France	Homme	49	2	97	74	72	9	80	78	82	54	7		2	82	mari&#233	1	2	3	6	2	4	21	72	69	27	24	67	19	74	30	77	169	100	100	-3	-55	-47	-43	42	-51
1297	France	Homme	34	2	50	50	16	57	50	50	23	50	47	profession interm&#233diaire	2	100	autre		2	96	0	9	5	14	30	100	28	50	50	17	100	50	50	168	65	65	96	-83	0	0	72	-16
1299	France	Femme	21	2	50	0	0	77	0	15	0	0	0	&#233l&#232ve ou &#233tudiant	5	100	concubinage	1	0	100	0	72	0	67	100	70	27	18	100	11	100	0	0	169	58	59	100	-89	0	-82	43	-33
1300	France	Femme	40	2	0	0	0	0	0	100	0	100	0	artisan, commer&#231ant ou chef d'entreprise	2	0	concubinage	1	2	100	100	100	100	0	0	100	100	100	100	0	0	0	0	167	67	67	0	0	0	0	0	0
1302	France	Femme	29	2	24	78	74	11	68	22	43	26		cadre et profession intellectuelle sup&#233rieure	4	88	PACS&#233	1	1	82	16	50	90	15	71	88	32	28	50	4	84	27	50	162	66	65	66	-80	-23	-22	56	-56
1303	France	Femme	23	2	34	24	100	0	26	0	25	0	50	&#233l&#232ve ou &#233tudiant	5	100	c&#233libataire	2	0	100	0	0	0	0	100	100	0	0	100	0	100	0	33	173	57	55	100	-100	-33	-100	100	-100
1304	France	Femme	74	2	97	80	75			50	76	77		retrait&#233	2	63	mari&#233	1	1	82	16	26	31	49			26	9	51	27	70	29	73	159	63	63	66	-43	-44	-42
1305	France	Femme	33	1	28	72	33	85	88	43			9	ouvrier	2	70	mari&#233	1	2	99	29	29	30	27	37	70	74	22	26	29	23			169	64	64	70	6		-4	-4	-10
1308	France	Femme	31	2	73	50	100	0	100	25	73	29	0	ouvrier	4	100	c&#233libataire	2	2	50	0	0	0	50	50	50	0	50	50	3	100	50	50	165	100	93	50	-97	0	0	50	0
1309	France	Femme	32	2	68	65	8		66	50			8		2	53	PACS&#233	1	1	58	61	62	62		65					16	12		70				-3	4
1310	France	Femme	38	2	45	78	88	50	84	80	88	50	15	profession interm&#233diaire	4	90	c&#233libataire	2	0	50	22	50	25	50	76	50	27	50	76	25	50	50	77	162	55	58	28	-25	-27	-26	23	-26
1311	France	Femme	29	1	13	79	80	85	65	30	64	50	50	cadre et profession intellectuelle sup&#233rieure	6	78	concubinage	1	0	97	50	87	43	50	50	50	50	50	65	8	17	11	32	165	63	65	47	-9	-21	-15	0	0
1314	France	Femme	59	2	50	81	83	83	86	6	90	55	68		6	50	mari&#233	1	3	50	50	50	50	28	23	50	21	50	50	16	50	2	1	164	69	70	0	-34	1	0	29	5
1320	France	Homme	50	2	100	75	67	0	9	46	19	50	0	artisan, commer&#231ant ou chef d'entreprise	2	83	c&#233libataire	2	0	78	16	13	0	27	68	75	0	77	73	50	86	78	100	176	75	78	62	-36	-22	4	75	-41
1321	France	Femme	46		33	34	0	75	50	27	50	50	28	profession interm&#233diaire	5	100	mari&#233	1	2	50	50	50	50	10	12	76	50	13	13	16	17	0	7	162	50	48	0	-1	-7	0	26	-2
1322	France	Femme	37	1	85	72	68	83	74	76	79	17	72	profession interm&#233diaire	5	28	c&#233libataire	2	0	61	68	72	74	72	88	50	36	50	78	50	27	50	65				-7	23	-15	-28	14	-16
1323	France	Femme	52	2	97	61	65	4	50	4	21	50	2	&#224 la recherche d'un emploi	1	97	mari&#233	1	6	73	2	1	2	50	2		98	50	50	50	11	50	50	168	82	82	71	39	0	0		48
1326	France	Femme	55	1	50	50	50	100	100	50	50	87	50	profession interm&#233diaire	4	100	mari&#233	1	2	50	19	50	50	50	70	50	93	92	50	88	50	50	50	163	80	80	31	38	0	42	-43	-20
1327	France	Femme	18	2	50	50	50	50	50	50	50	37	50	&#233l&#232ve ou &#233tudiant	2	72	c&#233libataire	2	0	80	46	74	70	50	50	82	50	50	50	18	67	50	50	176	80	81	34	-49	0	0	32	0
1328	France	Femme	48	2	50	17	18	19	79	26	18	68	18	profession interm&#233diaire	6	77	PACS&#233	1	3	97	23	76	76	0	9	79	79	1	3	0	0	50		160	95	91	74	0		-2	0	-9
1329	France	Femme	28	2	25	27	66	61	14	56	29	39	36		2	63	concubinage	1	3	80	15	20	22	50	73	50		30	28	49	54	0	0	168	102	104	65	-5	0	2		-23
1331	France	Femme	51	1			93	76						ouvrier	2	85	c&#233libataire	2	3	63	50	55	74	57	67	52	50	14	15	19	16	7	6	160	68		13	3	1	-1	2	-10
1332	France	Femme	52	2	73	73	23		20	74	61	73	21	cadre et profession intellectuelle sup&#233rieure	5	71	mari&#233	1	1	92	87	87	95	21	52	83	53	39	30	9	20	31	72	175	79	79	5	-11	-41	9	30	-31
1334	France	Femme	39	1	7		70	61	76	14	31	66		profession interm&#233diaire	4	91	c&#233libataire	2	2	73	73	77	82				30				66			160	48	48	0
1338	France	Femme	63	2	100	100	100	7	100	24	86	33	5	retrait&#233	4	100	concubinage	1	2	79	27	31	27	19	100	80	24	50	89	4	76	11	70	160	80		52	-72	-59	-39	56	-81
1341	France	Femme	36	2	32	84	100			22	32	4		&#224 la recherche d'un emploi	2	78	mari&#233	1	2	82	3	4	1	17	83	70	30	14	74	4	100	50	50	169	83	89	79	-96	0	-60	40	-66
1342	France	Femme	35	2	81	82			81	19	80			profession interm&#233diaire	4	78	concubinage	1	0	100	100	100	91				24		31	3	3		77	163	57	57	0	0
1344	France	Homme	37	2		50	71		22	28		24	22	profession interm&#233diaire	4	82	concubinage	1	1	68	51	51	50											182	84	84	17
1345	France	Femme	53	2	100	100	41	100	37	25	78	50	11	profession interm&#233diaire	2	100	concubinage	1	1	92	50	50	50	24	50	93	20	30	74	11	40	50	79	160	81	83	42	-29	-29	-44	73	-26
1346	France	Femme	43	2	84	93	54	80	27	76	71	86	74	profession interm&#233diaire	2	81	concubinage	1	0	69	50	50	50	73	51	28	50	78	54	72	37	29	29	177	72	71	19	35	0	24	-22	22
1347	France	Femme	18	2	86	72	86	50	8	93	82	50	7	&#233l&#232ve ou &#233tudiant	2	99	concubinage	1	0	50	50	58	52	50	68	74	61	87	87	79	7	0	1	167	70	70	0	72	-1	0	13	-18
1348	France	Femme	31	2			73			20			6	cadre et profession intellectuelle sup&#233rieure	6	100	PACS&#233	1	2	100	0	0	0				24		26	0	100			157	43	42	100	-100
1352	France	Femme	34	2	16	72	79	83	65	74	65	63	63	ouvrier	2	81	concubinage	1	2	68	42	60	50	39	57	60	47	61	38	50	48	7	10	170	64	64	26	2	-3	23	13	-18
1353	France	Femme	56	1	32	100	68	81	100	0	100	0	72	profession interm&#233diaire	2	28	mari&#233	1	0	100	0	0	0	0	100	100	1	100	0	0	100	69	84	155			100	-100	-15	100	99	-100
1354	France	Femme	24	2	61	63	64		64	50	50	50	2	cadre et profession intellectuelle sup&#233rieure	5	64	concubinage	1	0	100	81	87	86	0	0	84	84	51	72	0	13	7	7	163	56		19	-13	0	-21	0	0
1355	France	Femme	44	1	84	82	82	63	84	82	66	64	61	cadre et profession intellectuelle sup&#233rieure	5	77	concubinage	1	3	100	50	66	61	50	50	64	54	80	100	27	0	63	77	166	100	100	50	27	-14	-20	10	0
1357	France	Homme	30	1	93	91	19	99	100	98	89	93	97	profession interm&#233diaire	4	87	c&#233libataire	2	0	48	50	50	50	50	97	50	18	50	84	32	4	2	82	167	58	57	-2	28	-80	-34	32	-47
1358	France	Femme	41	1	67	67	57	86	62	32	61	33	13	cadre et profession intellectuelle sup&#233rieure	6	72	mari&#233	1	1	89	71	65	39	28	56	78	59	25	50	20	77	50	71	180	68	69	18	-57	-21	-25	19	-28
1359	France	Femme	48	2	97	98	98	99	50	50	97	93	83	profession interm&#233diaire	4	81	PACS&#233	1	0	95	22	18	3	80	98	23	4	78	98	8	50	36	92	169	105	105	73	-42	-56	-20	19	-18
1362	France	Femme	52	2	100	100	71	100	97	0	100	100	100	profession interm&#233diaire	4	100	mari&#233	1	1	100	100	100	100									46	75	160	59	59	0		-29
1363	France	Homme	52	2	77	84	81	3	50	90	71	75	70	cadre et profession intellectuelle sup&#233rieure	4	86	PACS&#233	1	0	98	11	5	6	68	8	65	20	97	5	17	77			172	72	72	87	-60		92	45	60
1364	France	Femme	42	2	58	65	50	64	61	55	0	55	35	profession interm&#233diaire	5	50	mari&#233	1	3	96	99	100	97	80	11	70	50	43	63	0	4	59	64	169	55	54	-3	-4	-5	-20	20	69
1365	France	Femme	29	2	50	50	1	65	88	50	27	28	50	profession interm&#233diaire	4	92	concubinage	1	0	63	11	9	11	50	50	50	34	50	50	23	77	50	50	163	66	66	52	-54	0	0	16	0
1366	France	Femme	33	1	19	64	7	92	50	50	50	50	25	cadre et profession intellectuelle sup&#233rieure	6	89	PACS&#233	1	0	63	60	55	58	27	83	84	27	43	50	12	8	29	32	160	52	52	3	4	-3	-7	57	-56
1367	France	Femme	21	2	64	64	0	0	50	78	56	37	50	&#233l&#232ve ou &#233tudiant	2	71	c&#233libataire	2	0	50	52	23	70							0	100	0	0	157	48	47	-2	-100	0
1369	France	Femme	56	1	73	73	21	85	50	23	69	69	15	profession interm&#233diaire	4	100	c&#233libataire	2	1	97	51	50	50	30	58	66	21	77	24	0	30	21	75	168	50	50	46	-30	-54	53	45	-28
1372	France	Femme	42	1			82	100	61	25		80	23	ouvrier	2	0	concubinage	1	1	95	21	19	73	50	74	79	65	64	32	29	34			163	93	94	74	-5		32	14	-24
1373	France	Femme	39	2	93	87	87	100	71	2	93	50	11	cadre et profession intellectuelle sup&#233rieure	4	62	c&#233libataire	2	1	93	7	17	23	60	98	94	50	83	25	10	71	23	87	171	74	78	86	-61	-64	58	44	-38
1381	France	Femme	52	1	80	80	80	95	87	90	79	83	85	profession interm&#233diaire	4	14	autre		0	65	26	49	50	49	84	50	18	50	50	31	5	48	98	165	106	106	39	26	-50	0	32	-35
1382	France	Femme	45	1	79	85	67	89	71	23	67	55	50		2	90	mari&#233	1	3	86	38	50	50	21	79	81	39	50	50	21	16	19	50				48	5	-31	0	42	-58
1384	France	Femme	41	2	89	87	73	47	79	19	84	26		artisan, commer&#231ant ou chef d'entreprise	4		c&#233libataire	2	0	53	31	32	29	29	22	78	72	73	27	22	32	67	21	171	77	77	22	-10	46	46	6	7
1385	France	Femme	25	1	70	50	50	100	50	50	50	29	31	profession interm&#233diaire	4	74	c&#233libataire	2	0	100	50	78	86	28	28	100	87	17	17	0	23	0	35	165	56	58	50	-23	-35	0	13	0
1386	France	Homme	59	1	42	50	50	50	66	26	70	66	65	cadre et profession intellectuelle sup&#233rieure	4	80	c&#233libataire	2	0	97	2	9	7	6	50	93	50	3	88	5	50	1	50	187	89	89	95	-45	-49	-85	43	-44
1387	France	Homme	37	2	29	29	0	19	0	82	14	77	17	cadre et profession intellectuelle sup&#233rieure	5	82	c&#233libataire	2	0	62	35	42	41	22	36	62	47	85	31	2	45	18	18	179	64	64	27	-43	0	54	15	-14
1391	France	Femme	22	2	0	13	52	50	63	68	17	61	63	&#233l&#232ve ou &#233tudiant	4	68	c&#233libataire	2	0	50	50	50	89	50	50	68	68	65	28	27	17	4	4	166	55	56	0	10	0	37	0	0
1392	France	Femme	54	1	67	73	19	100	72	86	68	77	100	ouvrier	4	100	mari&#233	1	2	88	72	37	99	34	100	76	18	65	89	36	32	26	24	160	64	64	16	4	2	-24	58	-66
1393	France	Homme	21	2	9	8	8	8	0	50	0	91	0	&#233l&#232ve ou &#233tudiant	4	50	c&#233libataire	2	0	50	50	50	50	17	19	86	77	50	50	16	22	50	50	173	66	65	0	-6	0	0	9	-2
1396	France	Femme	34	2	71	80	78	80	82	58	73	75	52	cadre et profession intellectuelle sup&#233rieure	6	75	mari&#233	1	2	100	100	100	100	28	69	78	63	14	31	0	0	50	50	170	57	59	0	0	0	-17	15	-41
1399	France	Homme	39	1	42	32	0	25	49	50	54	32	30	cadre et profession intellectuelle sup&#233rieure	5	68	mari&#233	1	2	50	50	50	50	50	63	64	48	30	31	39	50	50	50	175	61	61	0	-11	0	-1	16	-13
1400	France	Femme	30	2	11	54	18		11	94	16	66	0	cadre et profession intellectuelle sup&#233rieure	5	74	concubinage	1	0	35	66	50	50	50	50	73	36	50	50	70	35	20	21	168	60	59	-31	35	-1	0	37	0
1401	France	Femme	75	2	46	50	95	2	2	100	98	50	0	retrait&#233	2	100	mari&#233	1	1	84	24	50	99	0	100	86	21	86	50	15	15	49	68	153	59	59	60	0	-19	36	65	-100
1402	France	Femme	48	2	70	85	50	0	50	50	66	68	0	cadre et profession intellectuelle sup&#233rieure	6	100	mari&#233	1	2	100	86	86	86	50	50	62	40	66	73	23	23	50	50	165	55	54	14	0	0	-7	22	0
1403	France	Femme	29	1	95	95	97	7	5	1	98	98	2	profession interm&#233diaire	2	96	concubinage	1	1	68	16	14	16	4	50	98	99	50	50	2	0	50	50	172			52	2	0	0	-1	-46
1405	France	Femme	34	2	59	100	100	100	100	0	100	0	50	profession interm&#233diaire	4	97	c&#233libataire	2		100	0	2	0	23	49	100	23	71	50	0	100	0	0	169	59	59	100	-100	0	21	77	-26
1406	France	Femme	33	2	11	63	72	88	30	35	22	69	19	cadre et profession intellectuelle sup&#233rieure	6	79	c&#233libataire	2	0	72	83	93	63	65	68	71	50	80	76	14	58	5	5	176	70	72	-11	-44	0	4	21	-3
1407	France	Femme	25	2	70	85	58	80	81	22	82	42	0	artisan, commer&#231ant ou chef d'entreprise	4	99	concubinage	1	0	100	4	3	0	32	63	72	22	80	19	18	82	37	68	163	52	54	96	-64	-31	61	50	-31
1408	France	Femme	23	2	43	41	2	2	0	9	6	80	3	artisan, commer&#231ant ou chef d'entreprise	4	100	concubinage	1	0	71	96	100	100	48	2	20	60	72	23	0	0	50	50	157	52	52	-25	0	0	49	-40	46
1411	France	Femme	33	2	66	76	20	96	52	50	68	48	68	ouvrier	2	71	c&#233libataire	2	2	98	50	50	50	34	32	50	50	50	50	50	50	50	68	173	63	63	48	0	-18	0	0	2
1412	France	Femme	23	2	79	84	86	25	68	26	81	28	0	&#233l&#232ve ou &#233tudiant	5	72	autre		0	100	73	87	88	50	77	20	12	50	31	14	44	50	50	151	47		27	-30	0	19	8	-27
1413	France	Femme	34	2	68	80	59	88	68	64	81	80	71	profession interm&#233diaire	4	50	mari&#233	1	2	90	61	64	73	73	100	34	44	50	50	0	23	50	70	158	70	73	29	-23	-20	0	-10	-27
1415	France	Femme	21	2	70	69	68	100	100	100	77	100	100	profession interm&#233diaire	2	100	concubinage	1		100	0	0	0	68	100	100	13	88	87	0	100	80	79	170	60	60	100	-100	1	1	87	-32
1417	France	Homme	55	2	75	78	10	3	50	5	35	3	99	cadre et profession intellectuelle sup&#233rieure	5	65	PACS&#233	1	0	50	50	50	50	19	19	91	92	21	22	13	14	5	3	170	67	67	0	-1	2	-1	-1	0
1419	France	Femme	25	2	80	71	50	100	100	15	82	18	100	profession interm&#233diaire	5	0	c&#233libataire	2	0	65	26	1	0	36	55	75	0	25	74	33	100	57	84	166	48	50	39	-67	-27	-49	75	-19
1420	France	Femme	45	1	25	60	26	50	77	31	24	32	14	cadre et profession intellectuelle sup&#233rieure	6	86	PACS&#233	1	1	100	30	44	38		50	50	35	69	50	9	92	23	50	161	54	55	70	-83	-27	19	15
1421	France	Femme	57	1	40	41	26	43	46	63	30	67	21	profession interm&#233diaire	2	18	concubinage	1	0	50	50	50	50	61	100	65	64	21	22	21	21	9	8	172	72	72	0	0	1	-1	1	-39
1422	France	Homme	36	2	27	1	3	55	51	82	16	70	66	cadre et profession intellectuelle sup&#233rieure	5	100	mari&#233	1	0	50	78	79	84	31	30	50	38	20	23	1	0	0	0	176	85	85	-28	1	0	-3	12	1
1423	France	Femme	66	2	73	69	68	8	69	58	69	65	40	retrait&#233	2	69	veuf	3	6	93	27	46	48	65	89	35	13	50	50	16	20	50	69	152	55	55	66	-4	-19	0	22	-24
1424	France	Femme	47	2	89	98	63	100	73	92	33	96	73	profession interm&#233diaire	4	100	mari&#233	1	2	98	81	99	98	4	72	99	78	87	67	3	17	67	99	156	54	55	17	-14	-32	20	21	-68
1426	France	Homme	23	1	0	100	100	100	100	100	100	0	100	cadre et profession intellectuelle sup&#233rieure	5	100	c&#233libataire	2	0	100	100	100	100	0	100	100	4	3	50	0	0	0	3	190	72	72	0	0	-3	-47	96	-100
1429	France	Femme	37	2	50	50	83	77	50	50	67	33	82	ouvrier	4	100	mari&#233	1	2	100	100	98	99	1	69	100	100	50	50	50	50	0	44	165	68	68	0	0	-44	0	0	-68
1431	France	Femme	42	1	96	100	55	97	50	73	80	80	78	profession interm&#233diaire	4	100	mari&#233	1	2	77	27	50	50	22	100	68	33	45	83	25	24	50	69	164	56	55	50	1	-19	-38	35	-78
1433	France	Femme	30	2	67	52	0	0	0	75	66	0	0	ouvrier	4	85	mari&#233	1	0	74	70	71	70	84	19	30	78	81	18	17	53	7	8	153	70	70	4	-36	-1	63	-48	65
1435	France	Femme	33	2	65	64	55	50	56	63	64	54	50	cadre et profession intellectuelle sup&#233rieure	6	61	mari&#233	1	1	75	50	65	66	50	65	67	50	50	65	20	29	50	65	170	68	68	25	-9	-15	-15	17	-15
1436	France	Femme	54	2	61	60	50	50	58	75	56	50	59	profession interm&#233diaire	4	66	concubinage	1	2	50	71	70	70	64	31	64	67	61	32	27	16	60	59	151	72	70	-21	11	1	29	-3	33
1437	France	Femme	24	1	18	20	20	35	50	50	50	33	22	cadre et profession intellectuelle sup&#233rieure	6	71	PACS&#233	1	0	50	15	28	25	13	40	90	64	50	50	0	43	0	0	168	50	50	35	-43	0	0	26	-27
1438	France	Femme	25	2	73	100	85	50	58	0	100	30	50	&#233l&#232ve ou &#233tudiant	4	73	c&#233libataire	2	0	90	67	11	8	39	74	93	11	15	83	15	87			168	51	49	23	-72		-68	82	-35
1439	France	Homme	58	1	77	78	1	100	57	84	75	82	73		2	99	mari&#233	1	1	100	0	2	0	0	100	100	78	0	18	0	60	0	75	180	74	75	100	-60	-75	-18	22	-100
1440	France	Femme	55	1	90	90	68	100	85	64	90	18	18	profession interm&#233diaire	2	80	mari&#233	1	2	50	50	50	50	50	50	50	50	50	50	18	20	50	50	152	74	72	0	-2	0	0	0	0
1441	France	Femme	49	1	94	96	69	95	71	91	73	50	50	profession interm&#233diaire	2	93	mari&#233	1	3	98	19	75	21	50	50	50	50	50	50	50	50	9	79	169	81	81	79	0	-70	0	0	0
1442	France	Femme	49	2	98	100	73	98	76		80	73	65	profession interm&#233diaire	4	93	mari&#233	1	2	87	74	75	82		73		74							166	87	85	13
1443	France	Femme	39	1	73	75	97	87	82	78	77	81	82	profession interm&#233diaire	4	73	mari&#233	1	2	74	34	36	34	34	76	69	33	50			69			170	88	88	40				36	-42
1445	France	Femme	38	2	70	97	77	95	68	100	90	95	74	profession interm&#233diaire	4		mari&#233	1	2	80	32	30	26	20	71	79	20	20	72	21	25	15	79	157	64	64	48	-4	-64	-52	59	-51
1446	France	Femme	29	1	24	77	62	77	73	23	68	36	21	cadre et profession intellectuelle sup&#233rieure	6	79	c&#233libataire	2	0	87	18	18	29	36	64	35	25	31	65	62	19	50	50	176	71	71	69	43	0	-34	10	-28
1448	France	Femme	62	2	63	50	50		23	25	50	50		retrait&#233	4	100	mari&#233	1	1	100	100	100	100	50	66	50	50	50	50	0	0	50	50	164	80	80	0	0	0	0	0	-16
1449	France	Femme	27	2	28				33	68	41	26	13	profession interm&#233diaire	4		c&#233libataire	2	0	63	27	29	42	60	81	50	50	31	30	50	76	6	6	167	70	70	36	-26	0	1	0	-21
1450	France	Femme	43	2	50	35	12	72	3	38	3	29	18	ouvrier	2	70	mari&#233	1	2	80	20	27	33	10		82	50	57	40	20	77	11	50	156	58	63	60	-57	-39	17	32
1451	France	Homme	36	1	50	70	30	100	100	18	77	27	70	cadre et profession intellectuelle sup&#233rieure	5	100	PACS&#233	1	3	74	100	100	100	50	50	50	50	50	50	50	0	50	50	171	65	65	-26	50	0	0	0	0
1453	France	Homme	44	1	75	74	73	80	91	89	82	83	82	profession interm&#233diaire	4	90	mari&#233	1	3	84	94	50	50	50	88	50	13	17	50	6	79	50	74	183	85	85	-10	-73	-24	-33	37	-38
1454	France	Homme	38	2	50	50	22	25	14	9	14	67	5	cadre et profession intellectuelle sup&#233rieure	5	100	c&#233libataire	2	0	50	50	50	50									50	47	182	68	68	0		3
1455	France	Femme	34	1	69	74	18	97	85	50	68	71	83	profession interm&#233diaire	4	50	c&#233libataire	2	0	70	50	50	50	27	50	73	50	50	50	50	50	22	22	164	64	64	20	0	0	0	23	-23
1456	France	Femme	40	1	50	70	50	50	72	85	36	50	68	cadre et profession intellectuelle sup&#233rieure	6	65	PACS&#233	1	2	76	38	40	50	59	59	65	50	64	67	7	9	50	50	170	66	66	38	-2	0	-3	15	0
1457	France	Femme	49	1	50	80	82	87	93	91	81	86	79	profession interm&#233diaire	4	70	mari&#233	1	2	76	79	77	83	19	26	84	50	12	24	30	26	13	14	170	80	81	-3	4	-1	-12	34	-7
1458	France	Femme	27	2	68	78	0	76	89	0	70	30	22	ouvrier	2	72	c&#233libataire	2	0	71	0	27	24	100	100	69	0	100	100	0	100	0	0	157	70	68	71	-100	0	0	69	0
1459	France	Femme	44	2	50	50	29	76	86	77	61	60	27	cadre et profession intellectuelle sup&#233rieure	6	88	autre		0	65	50	50	50	50	62	86	75	16	31	0	15	0	20	169	65	65	15	-15	-20	-15	11	-12
1460	France	Femme	48	2	65	71	21	75	68	36	36	71	23	cadre et profession intellectuelle sup&#233rieure	6	72	mari&#233	1	2	88	28	37	39		70	73	29	50		24	70	25	26	169	71	71	60	-46	-1		44
1464	France	Femme	46	2	71	40	33	65	32	45	40	63	59	profession interm&#233diaire	4	61	mari&#233	1	2	86	79	88	80	15	18	73	81	44	41	3	4	1	2	165	99	97	7	-1	-1	3	-8	-3
1465	France	Femme	52	2	50	50	50	50	72	50	50	50	50	profession interm&#233diaire	5	100	c&#233libataire	2	2	99	50	50	98	100	50	50	50	100	50	0	50	50	50	167	80	78	49	-50	0	50	0	50
1469	France	Femme	38	2	100	99	83	100	74	18	94	50	89	profession interm&#233diaire	4	100	mari&#233	1	2	95	50	50	50	50	85	76	73	50	30	10	50	17	16	165	105	105	45	-40	1	20	3	-35
1471	France	Femme	50	1	79	80	18	100	77	81	72	67	62	profession interm&#233diaire	2	100	c&#233libataire	2	2	82	50	50	50	17	76	86	14	31	50	0	74	13	20	158	62	62	32	-74	-7	-19	72	-59
1472	France	Homme	43	2	95	0	98	63	39	0	50	82	45	profession interm&#233diaire	2	50	mari&#233	1	0	50	50	15	50	38	50	79	31	13	9	4	14	0	60	167	55	55	0	-10	-60	4	48	-12
1473	France	Femme	22	2	81	85	68	87	70	100	89	66	65	&#233l&#232ve ou &#233tudiant	5	66	c&#233libataire	2	0	100	83	100	100	50	80	100	72	23	50	0	0	22	74	157	45	45	17	0	-52	-27	28	-30
1475	France	Femme	37	2	61	66	54	50	58	53	61	49	38	cadre et profession intellectuelle sup&#233rieure	5	98	mari&#233	1	3	100	65	69	50	20	32	85	58	66	35	0	31	13	37	160	62	64	35	-31	-24	31	27	-12
1476	France	Femme	29	2	61	85	77		60	100	77	66		profession interm&#233diaire	4	73	c&#233libataire	2	0	72	37	32	7	13	27	88	30	18	65	33	66	0	18	176	64	64	35	-33	-18	-47	58	-14
1477	France	Femme	44	2	22	27	4				24	78	5	profession interm&#233diaire	5	70	mari&#233	1	2	76	21	26	24							26	93	5	5	158	60	60	55	-67	0
1478	France	Femme	44	2	42	40	13	19	43	22	27	45	44	profession interm&#233diaire	4	75	PACS&#233	1	2	75	44	59	43	55	57	71	57	69	31	19	39	50	50	168	58	60	31	-20	0	38	14	-2
1479	France	Femme	52	2	100	95	50	100	50	26	96	50	86	&#224 la recherche d'un emploi	2	86	mari&#233	1		100	38	48	50	21	93	95	27	25	79	50	50	17	81	145	46	47	62	0	-64	-54	68	-72
1480	France	Homme	49	1	2	1	1	3	0	94	4	87	1	cadre et profession intellectuelle sup&#233rieure	5	59	c&#233libataire	2	0	89	81	86	84	8	4	91	89	13	13	1	12	1	1	167	66	66	8	-11	0	0	2	4
1482	France	Femme	31	2	77	86	50	100	83	25	71	50	50	artisan, commer&#231ant ou chef d'entreprise	2	100	mari&#233	1	2	100	33	34	15	34	72	35	20	85	100	0	77	50	76	172	71	74	67	-77	-26	-15	15	-38
1483	France	Femme	31	2	64	83	34	90	80	69	70		78	cadre et profession intellectuelle sup&#233rieure	5	74	mari&#233	1	2	77	79	58	78	18	36	83	74	23	39	8	13	19	19	169	68	66	-2	-5	0	-16	9	-18
1484	France	Femme	40	2	79	100	100	100			67	25		ouvrier	2	72	c&#233libataire	2	1	83	23	27	26		70	83	32	19	23	17	74	14	79	175	58	58	60	-57	-65	-4	51
1487	France	Femme	54	2										cadre et profession intellectuelle sup&#233rieure	2	97	mari&#233	1	0	66	50	50	50	50	25	96	15	10	8	2	4			158	104	104	16	-2		2	81	25
1488	France	Femme	23	1	70	95	97	97	100	2	98	12	98	&#233l&#232ve ou &#233tudiant	5	100	c&#233libataire	2	0	98	16	50	50	10	97	99	4	2	50	4	5	8	69	163	50	48	82	-1	-61	-48	95	-87
1489	France	Femme	61	2	50	50	50	7	34	50	50	36	74	cadre et profession intellectuelle sup&#233rieure	5	77	concubinage	1	3	57	50	73	67	72	77	50	26	87	50	50	50	50	50	169	52	51	7	0	0	37	24	-5
1491	France	Femme	37	1	43	34	87	41	64	28	7		8	profession interm&#233diaire	4	83	PACS&#233	1	2	57	57	77	57	21	22	72	74	24	25	28	2	5	5	150	47	47	0	26	0	-1	-2	-1
1492	France	Femme	71	2	50	50	50	50	50	50	48	50	50	retrait&#233	4	84	mari&#233	1	3	50	50	50	50	50	50	50	50	50	50	50	50	50	50	164	62	62	0	0	0	0	0	0
1493	France	Femme	33	1	78	81	7	97	81	50	76	52	50	profession interm&#233diaire	2	76	c&#233libataire	2	2	50	50	50	50	50	50	79	11	20	83	32	58	22	73	168	62	66	0	-26	-51	-63	68	0
1494	France	Femme	45	1	74	83	17	88	80	15	74	69	29	profession interm&#233diaire	4	94	c&#233libataire	2	1	82	64	81	75	25	63	75	57	47	72	14	21	34	61	160	55	55	18	-7	-27	-25	18	-38
1495	France	Femme	43	1							79	95	0	ouvrier	2	82	concubinage	1	3	73	71	68	70	23	66	100	92		68	0	0	23	75	166	55	56	2	0	-52		8	-43
1496	France	Femme	61	1	85	73	15	91	74	26	50	19	1	profession interm&#233diaire	4	50	mari&#233	1	0	98	65	96	99	50	50	85	12	16	16	2	4	66	68	183	70	68	33	-2	-2	0	73	0
1497	France	Femme	46	2	12	21	71	22	0	90	8	29	6	profession interm&#233diaire	2	79	mari&#233	1	2	92	9	18	12	15	34	76	30	17	71	20	82	10	13	161	47	47	83	-62	-3	-54	46	-19
1499	France	Homme	49	2	71	71	71	91	16	37	82	29		&#224 la recherche d'un emploi	4	58	mari&#233	1	2	50	0	0	0	57	57	76	34	67		60	89	49	50	177	107		50	-29	-1		42	0
1500	France	Femme	34	2	19	14	72	59	50	23	15	61	31	ouvrier	2	98	concubinage	1	2	72	36	20	41	34	50	70	65	10	10	41	60	5	6	165	58	58	36	-19	-1	0	5	-16
1501	France	Homme	53	1	9	8	0	30	38	50	2		10	profession interm&#233diaire	4		c&#233libataire	2	2	19	18	39	28							85		0	2	170	69	69	1		-2
1503	France	Femme	42	2	83	85	81		94	10	93	50	50	&#224 la recherche d'un emploi	4	98	concubinage	1	2	83	50	63	65	28	76	97	50	82	50	27	76	32	52	167	105	106	33	-49	-20	32	47	-48
1505	France	Homme	28	1	0	0	0	0	33	71	0	88	0	profession interm&#233diaire	5	70	c&#233libataire	2	0	76	28	27	27	14	38	84	83	29	32	0	67	0	0	174	69	70	48	-67	0	-3	1	-24
1506	France	Femme	55	2	85	65	50	50	6	1	59	58	1	retrait&#233	5	100	mari&#233	1	3	70	98	100	100	66	91	73	50	50	60	20	4	50	50	163	63	63	-28	16	0	-10	23	-25
1507	France	Homme	41	1		84	89	85	85	27	67	50	31	cadre et profession intellectuelle sup&#233rieure	6	91	PACS&#233	1	2	62	67	59	68	50	73	50	38	50	72	20	6	50	50	186	67	67	-5	14	0	-22	12	-23
1508	France	Homme	26	2	100	100	0	0	69	18	100	12	0	profession interm&#233diaire	4	68	PACS&#233	1	0	47	47	50	50	0	49	100	0	100	21	0	100	0	100	171	82	81	0	-100	-100	79	100	-49
1511	France	Femme	36	1	98	97	99	97	58	10	96		3	ouvrier	2	50	c&#233libataire	2	2	96	4	10	20	9	84			82	7	3	61	3	1	163	59	59	92	-58	2	75		-75
1512	France	Homme	27	1	26	61	30	85	61	88	58	57	50	cadre et profession intellectuelle sup&#233rieure	6	97	concubinage	1	0	89	50	27	67	13	30	98	100	23	40	3	26	12	26	169	79	80	39	-23	-14	-17	-2	-17
1514	France	Femme	33	1	50	50	3	70	3	98	50	74	15	profession interm&#233diaire	4	77	mari&#233	1	2	75	76	50	50	1	22	96	80	50	50	2	2	3	8	175	80	80	-1	0	-5	0	16	-21
1515	France	Homme	49	2	64	50	68	50	58	41	54	57	7	cadre et profession intellectuelle sup&#233rieure	4	70	mari&#233	1	2	70	28	36	34	50	50	40	50	59	40	23	66	39	60	175	121	119	42	-43	-21	19	-10	0
1521	France	Femme	30	2	3	25	3	78	70	31	6	35	75	profession interm&#233diaire	4	72	concubinage	1	2	100	85	99	73	28	68	74	43	15	70	12	27	50	50	159	80	81	15	-15	0	-55	31	-40
1522	France	Homme	37	2	65	53	50	50	100	100	50	50	50	artisan, commer&#231ant ou chef d'entreprise	2	98	c&#233libataire	2	0	100	0	0	0	41	65	100	50	33	77	0	100	0	50	180	76	78	100	-100	-50	-44	50	-24
1523	France	Femme	27	1	18	87	85	61	16	80	10	69	72		4	60	PACS&#233	1	1	77	81	83	81	31	62	82	67	22	40	14	14	0	0	173	65	66	-4	0	0	-18	15	-31
1524	France	Femme	24	1	22	72	30	87	71	15	78	61	11	cadre et profession intellectuelle sup&#233rieure	6	21	c&#233libataire	2	0	87	27	26	23	24	76	75	76	87	100	22	67	0	1	175	72	74	60	-45	-1	-13	-1	-52
1525	France	Femme	37	1	89	93	71	98	80	19	94	28	90	profession interm&#233diaire	4	99	autre		2	83	71	38	98	27	27	88	28	50	65	22	28	3	64	170	86	87	12	-6	-61	-15	60	0
1526	France	Homme	68	2	74	74	74	50	50	21	50	50	13	retrait&#233	2	73	mari&#233	1	3	50	50	72	87	50	50	50	50	24	27	19	19	44	67	182	82	82	0	0	-23	-3	0	0
1527	France	Femme	35	1	70	72	78	97	83	83	90	90	100	profession interm&#233diaire	4		PACS&#233	1	2	97	10	10	3	75	76	30	23	71	63	14	15	71	52	166	75	75	87	-1	19	8	7	-1
1529	France	Femme	41	1	98	99	92	99	50	61	73	58	65	profession interm&#233diaire	4	81	mari&#233	1	3	50	45	50	50	15	53	84	50	19	44	9	50	63	97	152	90	86	5	-41	-34	-25	34	-38
1530	France	Femme	31	2	62	61	50		50			62		cadre et profession intellectuelle sup&#233rieure	5	71	concubinage	1	0	93	64	55	56	30	51	73	38			10	11	13	19	160	53	54	29	-1	-6		35	-21
1531	France	Femme	38	2	98	100	38	50	50	4	100	4	97	profession interm&#233diaire	2	99	mari&#233	1	2	100	50	50	50	99	98	6	2	100	98	3	50	100	100	160	116	107	50	-47	0	2	4	1
1533	France	Femme	34	2	80	80	12	72	67	34	63	50	62	profession interm&#233diaire	4	76	concubinage	1	1	71	71	69	80	27	54	90	22	28	26	28	28	47	62	168	64	64	0	0	-15	2	68	-27
1537	France	Femme	57	2	84	81	26	26	26	25	79	63	19	cadre et profession intellectuelle sup&#233rieure	4	81	concubinage	1	2	50	61	64	64	24	39	69	50	41	50	19	33	14	18	172	69	67	-11	-14	-4	-9	19	-15
1538	France	Femme	56	1	77	76	24	76	80	78	63	69	63	profession interm&#233diaire	4	100	mari&#233	1	3	93	82	83	84	50	57	87	65	50	61	10	33	0	0	170	60	61	11	-23	0	-11	22	-7
1540	France	Femme	35	2	50	100	73	100	90	13	84	7	92	profession interm&#233diaire	2	75	PACS&#233	1	3	97	80	87	89	68	74	23	4	73	79	0	10	32	36	162	77	76	17	-10	-4	-6	19	-6
1541	France	Homme	63	2	66	50	50	71	2	100	50	50	50	&#224 la recherche d'un emploi	1	74	veuf	3	1	66	34	58	50	21	50	50	32	60	35	37	64	12	13	172	80	80	32	-27	-1	25	18	-29
1542	France	Femme	35	1	27	27	26	67	68	33	61	50	0	profession interm&#233diaire	4	50	c&#233libataire	2	3	100	50	50	50	27	71	69	50	0	60	0	0	50	50	173	72	69	50	0	0	-60	19	-44
1544	France	Femme	37	2	92	82	82	90	50	83	76	100	50	cadre et profession intellectuelle sup&#233rieure	6	85	PACS&#233	1	2	92	28	25	51	7	95	86	5	8	43	7	24	11		158	58	60	64	-17		-35	81	-88
1546	France	Femme	52	2	23	22	50	75	76	49	94		73	cadre et profession intellectuelle sup&#233rieure	5	100	c&#233libataire	2	2	50	51	87	84	23	24	50	95	14	28	50	50	50	66	166	67	67	-1	0	-16	-14	-45	-1
1548	France	Femme	31	2	75	70	75		67	25	75	36		&#224 la recherche d'un emploi	5	100	concubinage	1	0	0	0	0	0	31	100	100	0	50	50	100	100	14	63	160	59	59	0	0	-49	0	100	-69
1549	France	Femme	70	2	53	10	9	4	7	5	9	50	1	retrait&#233	4	93	mari&#233	1	0	81	43	56	57	53	55	84		50	50	18	50	25	28	162	78	78	38	-32	-3	0		-2
1551	France	Homme	34	2		100	100	4	3	100	100	4	6		2	3	c&#233libataire	2	2	74	10	10	14	6	97	95		98	7	6	96	5	7	175	95	97	64	-90	-2	91		-91
1552	France	Femme	52	2	50	57	61	89	83	68	40	50	85	cadre et profession intellectuelle sup&#233rieure	6		mari&#233	1	2	100	99	100	99	50	50		50		50	14	0	63	40	150	38	39	1	14	23			0
1553	France	Femme	42	1	54	55	55	59	61	63	50			profession interm&#233diaire	4	63	c&#233libataire	2	0	83	61	60	60											175	58	58	22
1554	France	Homme	61	2	75	50	50	100	1	77	0	77	0	cadre et profession intellectuelle sup&#233rieure	4	99	mari&#233	1	1	99	50	71	50	50	50	80	67	21	23	17	38	1	1	172	81	82	49	-21	0	-2	13	0
1556	France	Femme	23	2	21	78	76	60	69	32	75	26	17	&#233l&#232ve ou &#233tudiant	4	81	c&#233libataire	2	0	81	12	19	19	8	68	82	27	77	77	8	76	9	41	173	59	62	69	-68	-32	0	55	-60
1557	France	Femme	29	1	96	100	57	94	66	9	100	29	98	profession interm&#233diaire	4	85	c&#233libataire	2	0	50	30	50	50	33	50	81	31	59	83	26	22	12	80	165	67	70	20	4	-68	-24	50	-17
1559	France	Femme	24	2	78	79	65	100	100		64		74	profession interm&#233diaire	2	89	c&#233libataire	2	0	66	0	28	21							75				160	59	57	66
1561	France	Femme	37	1	26	43	64	60	82	21	65	54	59	cadre et profession intellectuelle sup&#233rieure	4	100	c&#233libataire	2	1	57	64	65	62	67	25			61	36	50	70		67	170	61	61	-7	-20		25		42
1563	France	Femme	25		0	0	0	0	0	100	6	93	0	&#233l&#232ve ou &#233tudiant	5	100	c&#233libataire	2	0	92	85	81	80	57	37	63	64	65		7	27			173	63	64	7	-20			-1	20
1564	France	Femme	42	1	12	50	50	50	68	19	50	50	69	cadre et profession intellectuelle sup&#233rieure	5	78	mari&#233	1	3	50	50	50	50	50	50	50	50	50	50	27	70	50	50	171	65	65	0	-43	0	0	0	0
1565	France	Femme	36	1	22	77	72	62	83	8	83	28	50	ouvrier	2	84	autre		0	73	27	47	37	30	68	83	36	65	68	13	74	12	74	167	87	89	46	-61	-62	-3	47	-38
1567	France	Homme	45	2	0	1	2	9	2	95	2	93	4	cadre et profession intellectuelle sup&#233rieure	5	59	PACS&#233	1	0	81	77	82	83	27	6	79	82	74	34	12	13	3	1	178	71	71	4	-1	2	40	-3	21
1570	France	Femme	26	2	79	76	85	84	74	32	78	37	38	profession interm&#233diaire	5	66	concubinage	1	0	84	81	76	78	50	71	50	38	76	76	23	22		73	160	62		3	1		0	12	-21
1572	France	Femme	34	2	78	75	100	0	100	12	86	5	5	ouvrier	2	98	PACS&#233	1	3	88	0	0	0	76	100	93	19	86	100	16	95	50	50	159	60	64	88	-79	0	-14	74	-24
1574	France	Femme	53	1	58	60	20	89	50	31	67	50	50	profession interm&#233diaire	4	100	mari&#233	1	2	99	99	50	50	54	52	50	50	56	55	0	26	50	64	162	58	58	0	-26	-14	1	0	2
1575	France	Femme	27	2	50	50	50	100	50	72	50	75	20	ouvrier	2	90	concubinage	1	0	80	6	0	0	13	75	100	35	7	94	5	77	7	76	168	85	81	74	-72	-69	-87	65	-62
1576	France	Femme	25	2	100	89	72	50	100	20	78	21	12	profession interm&#233diaire		88	c&#233libataire	2	1	68	34	79	75	19	50	78	46	15	65	3	100	16	79	158	50	52	34	-97	-63	-50	32	-31
1577	France	Femme	46	2	91	94	91	13	82	44	63	50	69	profession interm&#233diaire	4	0	PACS&#233	1	0	73	30	35	38	12	61	76	50	26	25	15	60	50	73	160	85	90	43	-45	-23	1	26	-49
1579	France	Femme	34	2	75	76	59	0	57	30	62	58	9	artisan, commer&#231ant ou chef d'entreprise	2	82	concubinage	1	0	49	50	50	46	55	44	50	50	50	50	18	47	50	60	161	68	67	-1	-29	-10	0	0	11
1580	France	Homme	62	1	76	68	50	78	50	23	50	50	14	cadre et profession intellectuelle sup&#233rieure	6	50	mari&#233	1	3	83	50	50	50	50	50	50	30	50	50	4	3	50	69	174	92	90	33	1	-19	0	20	0
1582	France	Homme	34	2	73	72			100	71	71	36		artisan, commer&#231ant ou chef d'entreprise	4	88	PACS&#233	1	2	97	28	34	35	26		95	17	21		0	13	2	67	176	86	86	69	-13	-65		78
1583	France	Homme	49	2	50	50	50	50	50	53	50	50	51	cadre et profession intellectuelle sup&#233rieure	5	50	mari&#233	1	2	50	50	50	50	50	50	54	33	50	46	50	48	50	50	170	70	70	0	2	0	4	21	0
1584	France	Femme	27	2	82	77	9	18	34	77	84	19	71	profession interm&#233diaire	4	67	c&#233libataire	2	2	29	88	100	98	87	1	73	88	24	50	74	72	50	63	170	90	90	-59	2	-13	-26	-15	86
1585	France	Femme	43	1	50	98	96	83	50	50	66	81	68	profession interm&#233diaire	5	26	PACS&#233	1	1	50	50	50	50	50	50	50	50	50	50	11	12	50	50	158	70	68	0	-1	0	0	0	0
1586	France	Femme	50	2	80	83	11	98	13	9	86	74	10	artisan, commer&#231ant ou chef d'entreprise	4	63	mari&#233	1	1	97	30	39	79			78	38			21	21		67	166	74	73	67	0			40
1587	France	Femme	56	2	100	100	27	29	34	100	100	50	4	ouvrier	2	100	mari&#233	1	1	100	0	0	0	0	0	100	0	0	1	0	0	0	100	160	64	64	100	0	-100	-1	100	0
1588	France	Femme	48	1	50	50	50	90	50	50	50	50	50	profession interm&#233diaire	4	90	mari&#233	1	3	50	50	50	50	17	35	100	87	8	10	7	6	1	3	168	80	80	0	1	-2	-2	13	-18
1589	France	Homme	64	2	50	50	50		81	50	50	50	50	retrait&#233	1	82	mari&#233	1	1	61	50	64	60			50	50	50	50	33	41	50	50	180	78	78	11	-8	0	0	0
1590	France	Femme	65	2	77	92	91		85	92	90			retrait&#233	2	93	mari&#233	1	2	99	13	14	13	12	14	86	12	10	12	9	13	9	85	162	66	68	86	-4	-76	-2	74	-2
1591	France	Femme	27	2	73	77	78	57	41	71	70	55	2	cadre et profession intellectuelle sup&#233rieure	6	70	c&#233libataire	2	0	74	74	78	71	0	40	60	22	40	74	32	65	1	60	174	67	67	0	-33	-59	-34	38	-40
1592	France	Femme	29	2	94	91	90	88	90	98	82	50	50	cadre et profession intellectuelle sup&#233rieure	6	88	concubinage	1	0	50	22	22	20	17	67	50	29		76	27	50	24	85	165	63	63	28	-23	-61		21	-50
1594	France	Femme	29	2	76	79	76	76		32	65	24		profession interm&#233diaire	2	91	c&#233libataire	2	0	70	24	25	24	36	86	92	49	85	50	24	83	50	50	168	59	60	46	-59	0	35	43	-50
1595	France	Femme	49	2	87	92	50		50	50	50	50			5	63	mari&#233	1	1	82	20	50	50	35	51	77	18	30	50	26	62	63	85	180	85	86	62	-36	-22	-20	59	-16
1596	France	Homme	30	2	80	74	27	30	70	18	70	28	35	profession interm&#233diaire	4	100	concubinage	1	0	100	83	85	85	15	52	86	60	15	62	0	29	20	25	179	88	88	17	-29	-5	-47	26	-37
1597	France	Femme	55	2	27	26	76	78	71	23	22	39	5	artisan, commer&#231ant ou chef d'entreprise	5	84	mari&#233	1	1	50	50	50	50	50	52	50	50	50	50	50	50	50	50	164	98	98	0	0	0	0	0	-2
1598	France	Femme	53	2	85	100	83	100	50	50	95	82	0	profession interm&#233diaire	2	86	c&#233libataire	2	1	100	0	0	0	0	68	0	50	0	37	0	69	67	84	159	70	70	100	-69	-17	-37	-50	-68
1599	France	Femme	64	1	38		35	29	32	61	35	80	24	ouvrier	2	94	concubinage	1	0	85	34	37	22		66	80	62	62	63	20	37			166	78	78	51	-17		-1	18
1600	France	Femme	48	2	52	100	27	100	71	30	100	28	100	cadre et profession intellectuelle sup&#233rieure	4	100	autre		2	100	5	23	21		100	100	10	100	12	0	77	22	77	170	67	64	95	-77	-55	88	90
1602	France	Femme	32	1	50	100	67	100	100	14	60	49	65	artisan, commer&#231ant ou chef d'entreprise	4	73	mari&#233	1	1	50	50	51	33	50	75	50	38	50	51	24	4	50	50	165	81	82	0	20	0	-1	12	-25
1603	France	Homme	26	2	31	24	6	20	45	43	17	75	5	&#224 la recherche d'un emploi	5	81	concubinage	1	0	81	60	60	61	23	26	86	78	15	25	13	22	74	74	178	63	63	21	-9	0	-10	8	-3
1604	France	Femme	35	2								10	3	ouvrier	2	80	c&#233libataire	2		100	0	5	0				20				95			165	90	92	100
1605	France	Femme	21	1	73	75	50	82	84	78	82	83	50	profession interm&#233diaire	2	100	concubinage	1	0	68	18	23	18		51	59	27			26	64	36	75	160	51	52	50	-38	-39		32
1606	France	Femme	43	2	98	99	11	4	14	85	99	26	3	cadre et profession intellectuelle sup&#233rieure	5	96	concubinage	1	4	99	31	74	60	51	79	70	41	60	73	3	64	74	84	165	52	51	68	-61	-10	-13	29	-28
1608	France	Femme	31	2	76	77	63	93	85	51	50	55	20	profession interm&#233diaire	4	100	mari&#233	1	1	50	50	50	50	50	71	68	67	50	50	50	35	30	57	172	76	77	0	15	-27	0	1	-21
1610	France	Femme	49	2	88	100	92	25	86	100	86	100	40	profession interm&#233diaire	4	89	concubinage	1	5	81	97	41	42	100	67	65	82	60	81			2	72	160	58	63	-16		-70	-21	-17	33
1611	France	Homme	42	2	0			3	0		0		0	ouvrier	4	100	mari&#233	1	0	82	20	13		17			20	81	83	12	96	11	7	177	70	72	62	-84	4	-2
1612	France	Femme	44	1	62	63	73	52	0	100	18	29	0	profession interm&#233diaire	4	77	c&#233libataire	2	1	83	50	58	71	12	78	79	65	6	0	29	64	0	10	175	90	90	33	-35	-10	6	14	-66
1613	France	Homme	56	2	100	50	71	50	50	50	50	81	50	retrait&#233	4	94	mari&#233	1	2	50	23	21	23	50	50	50	50	50	50	3	80	50	50	180	70	70	27	-77	0	0	0	0
1614	France	Femme	44	1	72	91	76	100	90	78	78	90	74	profession interm&#233diaire	2	89	mari&#233	1	3	98	77	74	77	14	79	82	30	50	50	17	51	21	35	158	110	110	21	-34	-14	0	52	-65
1615	France	Femme	38	2		73	19		21	26		64	7	cadre et profession intellectuelle sup&#233rieure	4	100	PACS&#233	1	0	70	72	72	100			72		52		26			72	162	71	72	-2
1616	France	Femme	41	1	11	15	77	80	91	50	26		73	cadre et profession intellectuelle sup&#233rieure	5	75	PACS&#233	1	2	89	91	93	93	50	50	50	50	50	50	51	74	50	50	162	67	67	-2	-23	0	0	0	0
1617	France	Homme	26	2	72	56	4	89	22	25	90	81	18	cadre et profession intellectuelle sup&#233rieure	5	81	c&#233libataire	2	0	65	32	32	32	9	62	83	28	69	30	6	81	11	16	177	75	75	33	-75	-5	39	55	-53
1618	France	Femme	33	1	18	79	42	74	80	73	100	72	100	profession interm&#233diaire	6	73	concubinage	1	0	89	78	71	72		67	59	37				44		62	167	55	53	11				22
1620	France	Femme	28	1	37	37	15	72	71	56	42	63	57	artisan, commer&#231ant ou chef d'entreprise	4	80	concubinage	1	0	39	61	74	61	28	26	72	75	32	41	24	25	27	28	160	78	75	-22	-1	-1	-9	-3	2
1621	France	Femme	28	2	78	50	22	21	50	51	50	50	10	cadre et profession intellectuelle sup&#233rieure	4	76	PACS&#233	1	1	76	26	26	28	23	30	84	84	28	26	24	78	50	50	165	57	57	50	-54	0	2	0	-7
1622	France	Femme	39	2	83	61	2	98	50	37	68	41	98	cadre et profession intellectuelle sup&#233rieure	5	92	c&#233libataire	2	1	100	75	81	82	50	50					2	4	35	76	172	59	59	25	-2	-41			0
1623	France	Femme	42	2	21	12	19	74	50	17	17	71	17	cadre et profession intellectuelle sup&#233rieure	2	100	mari&#233	1	3	100	100	100	99	93	67	70	84	100	23	2	0	0	0	170	67	67	0	2	0	77	-14	26
1624	France	Homme	24	2	25	22	27	65	32	33	32	60	58	profession interm&#233diaire	4	88	concubinage	1	0	90	28	67	83	14	36	87	86	7	12	9	78	38	38	171	71	71	62	-69	0	-5	1	-22
1627	France	Homme	27	1	100	77	21	100	89	26	60	36	73	ouvrier	2	72	c&#233libataire	2	0	50	50	50	50	22	38	64	80	24	22	20	76	23	69	190	120	120	0	-56	-46	2	-16	-16
1629	France	Femme	31	2	82	100	100	100	100	0	100	0	100	profession interm&#233diaire	4	13	c&#233libataire	2	0	100	50	100	0	72	100	37	0	14	75	0	100	20	50	163	68	70	50	-100	-30	-61	37	-28
1631	France	Femme	32	2	73	52	0	0	51	21	65	26	0	profession interm&#233diaire	5	99	c&#233libataire	2	0	89	62	71	81	74	50	70	83	69	81	13	33	50	50	176	81	80	27	-20	0	-12	-13	24
1632	France	Femme	44	1	21	3	11	28	79		13	14	1	profession interm&#233diaire	4	66	mari&#233	1	6	99	75	72	77	50	50	67	38	77	31	3	67	4	3	160	49	49	24	-64	1	46	29	0
1634	France	Femme	54	2	100	100	100	0	0	100	100	100	59	profession interm&#233diaire	2	100	c&#233libataire	2	0	100	100	100	100	62	100	0	0	0	100	0	100	91	100	160	85	85	0	-100	-9	-100	0	-38
1636	France	Homme	40	2	27	60	13	81	12	78	59	12	10	profession interm&#233diaire	4	83	PACS&#233	1	1	63	64	61	63	62	34	50	50	50	50	0	0	44	43	160	75	75	-1	0	1	0	0	28
1637	France	Femme	31	1	33	75	1	98	100	65	63	90	73	profession interm&#233diaire	4	80	c&#233libataire	2	0	85	82	76	77	69	73	97	97	78	27	35	7	2	5	163	54	56	3	28	-3	51	0	-4
1638	France	Femme	26	2			4	75	83		16	59		profession interm&#233diaire	4	85	concubinage	1	0	69	37	35	43	31	34	66	62			37	64	37	38	165	53	53	32	-27	-1		4	-3
1639	France	Homme	43	2	20	16	0	75	88	0	20	26	83	profession interm&#233diaire	4	15	concubinage	1	1	40	20	69	57	70	61	44	31	63	56	40	57	50	50	171	72	72	20	-17	0	7	13	9
1641	France	Homme	58	1					69		79	68	69	profession interm&#233diaire	4	85	mari&#233	1	0	50	50	50	50	15	50	84	50	50	50	21	50	50	50	182	85	85	0	-29	0	0	34	-35
1643	France	Femme	40		85	82	42	38	11	96	100	42	100	profession interm&#233diaire	5	100	mari&#233	1	2	100	78	100	77	10	100	100	37	5	50	5	15	1	50	164	50	50	22	-10	-49	-45	63	-90
1644	France	Femme	51	2	73	50	19	100					68	cadre et profession intellectuelle sup&#233rieure	6	32	veuf	3	1	68	37	100	24		78	72	42			0	26			163	63	64	31	-26			30
1645	France	Femme	34	2	100	100	100	100	100	100	100	100	80	ouvrier	2	100	PACS&#233	1	2	100	0	0	0	23	100	29	0	50	50	0	98	19	84	165	110	110	100	-98	-65	0	29	-77
1646	France	Femme	21	2	50	100	100	100	100	50	50	0	100	&#233l&#232ve ou &#233tudiant	4	100	c&#233libataire	2	0	100	0	0	57	50	100	58	0	50	100	37	100	50	50	155	50	55	100	-63	0	-50	58	-50
1647	France	Femme	55	1	63	54	0	73	74	50	31	60	66	artisan, commer&#231ant ou chef d'entreprise	2	62	mari&#233	1	2	96	11	36	35	28	66	98	18	0	82	0	16	2	72	158	49	49	85	-16	-70	-82	80	-38
1649	France	Femme	34	2	100	99	78	100	82	51	75	50	50	cadre et profession intellectuelle sup&#233rieure	5	50	PACS&#233	1	2	94	94	93	93	50	73	83	50	62	92	10	1	19	79	167	64	62	0	9	-60	-30	33	-23
1650	France	Femme	53	1				70			83	81	22	profession interm&#233diaire	2	100	c&#233libataire	2	0	100	0	0	10	11	82	95		21	80	24	75	0	0	160	55	53	100	-51	0	-59		-71
1652	France	Femme	26	2	93	82	81	99	84	29	93		20		2	0	concubinage	1	2	33	33	71	28	5	73	5	1	0	0	3	3	3	0	163	73	75	0	0	3	0	4	-68
1653	France	Femme	42	2	13	67	75	100	91	26	30	79	97	profession interm&#233diaire	5	97	c&#233libataire	2	0	96	50	50	50	13	26	96	67	17	34	0	2	7	6	169	84	84	46	-2	1	-17	29	-13
1654	France	Femme	26	2	100	100	30	100	100	0	100	14	80	profession interm&#233diaire	4	61	PACS&#233	1	0	83		69	100	50	99	82	19	61	87	0	45	32	68	158	58	58		-45	-36	-26	63	-49
1655	France	Femme	57	2	100	100	50	50	50	100	100	50	50	ouvrier	2	100	PACS&#233	1	0	100	100	0	0	0	100	100	0	0	100	0	100	50	100	170	53	55	0	-100	-50	-100	100	-100
1656	France	Femme	35	2	99	72	73		65	50	69	27		cadre et profession intellectuelle sup&#233rieure	6	72	PACS&#233	1	2	100	72	59	74	0		100		0	71	0	0	20	30	174	78	77	28	0	-10	-71
1657	France	Femme	31	2	88	55	50	0	50	72	66	42	0	profession interm&#233diaire	5	59	concubinage	1	0	82	27	34	19	63	58	67	69	60	63	50	82	24	37	160	53	51	55	-32	-13	-3	-2	5
1659	France	Femme	38	1	92	86	87	100	88	73	82	50	50	profession interm&#233diaire	4	20	mari&#233	1	2	65	65	67	67	50	63	50	35	50	50	27	65	50	63	165	87	82	0	-38	-13	0	15	-13
1660	France	Femme	36	2	50	96	27	89	31	82	40	71	23	cadre et profession intellectuelle sup&#233rieure	6	66	concubinage	1	0	77	42	78	59	50					62	27				168	52	52	35
1661	France	Femme	39	2	11	9	100	99	79	82	17	78	76	profession interm&#233diaire	4	78	concubinage	1	1	99	75	76	81	19	15	17	20	14	13	3	26	2	1	168	66	66	24	-23	1	1	-3	4
1665	France	Femme	22	2	92	90	61	43	0	9	73	72	1	&#224 la recherche d'un emploi	4	97	concubinage	1	0	83	65	65	65	35	60	79	21	25	53	25	61	5	50	170	53	53	18	-36	-45	-28	58	-25
1667	France	Femme	44	1	81	87	80	91	87	26	80	17	72	cadre et profession intellectuelle sup&#233rieure	5	50	mari&#233	1	2	80	77	80	75	50	57	74	36	35	72	12	16	34	63	158	48	46	3	-4	-29	-37	38	-7
1668	France	Femme	51	2	100	100	100	50	0	50	100	50	0	ouvrier	2	100	mari&#233	1	3	100	7	55	57	19	98	100	53	76	39	25	85	50	100	156	86	80	93	-60	-50	37	47	-79
1669	France	Femme	37	2	4	51	5	100	92	31	25	51	71	profession interm&#233diaire	4	50	mari&#233	1	2	98	97	75	73	16	73	50	50	25	52	13	13	8	8	160	80	80	1	0	0	-27	0	-57
1672	France	Femme	37	2	82	92	67	100	81	8	85	24	82	profession interm&#233diaire	4	55	mari&#233	1	2	50	29	50	28	50	73	50	25	31	49	32	50	25	71	150	63	65	21	-18	-46	-18	25	-23
1675	France	Femme	41	1	82	81	50	82	67	81	76	73	61	ouvrier	4	28	c&#233libataire	2	0	80	79	59	61	31	30	77	79	28	28	10	8	70	72	162	73	71	1	2	-2	0	-2	1
1676	France	Femme	35	1	50	50	7	23	15	50	24	79	16	cadre et profession intellectuelle sup&#233rieure	5	92	mari&#233	1	0	97	97	98	100	28	29	66	66	83	82	0	2	76	76	167	80	80	0	-2	0	1	0	-1
1677	France	Femme	32	2	82	89	73	88	82	17	66	61	40	ouvrier	2	69	PACS&#233	1	2	83	12	27	28	39	79	80	38	50	79	32	55	50	50	172	110	116	71	-23	0	-29	42	-40
1678	France	Femme	32	2	73	50	0	3	75	75		50	0	profession interm&#233diaire	2	97	c&#233libataire	2	1	97	18	50	50	50	50	52	33	50	50	3	83	3	3	165	80	76	79	-80	0	0	19	0
1679	France	Femme	44	1	60	98	27	97	99	3	97	5	93	profession interm&#233diaire	5	98	concubinage	1	2	99	98	97	96	81	99		10	50	50	50	50	50	50	165	55	55	1	0	0	0		-18
1682	France	Femme	42	1	78	88	50	74	77	69	65	67	60	artisan, commer&#231ant ou chef d'entreprise	6	74	c&#233libataire	2	0	67	79	73	76	50	50	50	50	50	50	25	16	50	62	168	80	80	-12	9	-12	0	0	0
1684	France	Femme	20	2			75	76	50	30	73	75	78	&#233l&#232ve ou &#233tudiant	4	100	c&#233libataire	2	0	70	68	75	28	56	57	50	17	27	27	47	65			160	46	46	2	-18		0	33	-1
1687	France	Femme	38	2		18	2			96	12	98	25	profession interm&#233diaire	5	84	mari&#233	1	3	100	97	96	100	16	16	92	92	8	8	2	4	24	27	165	64	65	3	-2	-3	0	0	0
1688	France	Femme	57	2	76	100	100	100	100	100	100	100	100	profession interm&#233diaire	4	100	mari&#233	1	3	76	22	92	30	33	75	69	22		65	22				167	60	60	54				47	-42
1690	France	Femme	21	2	100	99	100	0	94	8	100	42	0	&#224 la recherche d'un emploi	2	95	c&#233libataire	2	1	67	0	1	0	29	72	73	0	30	100	0	100	73	100	161	43	47	67	-100	-27	-70	73	-43
1691	France	Femme	21	2	50	79	82	50	79	23	79	25	50	&#233l&#232ve ou &#233tudiant	4	50	c&#233libataire	2	0	76	0	3	6		49	50	50			17	90	50	50	161	65	63	76	-73	0		0
1692	France	Homme	68	2	50	50	50			50	50	50		retrait&#233	1	50	PACS&#233	1	0	50	50	50	50	50	50	50	50	50	50	50	50	50	50	172	93	90	0	0	0	0	0	0
1693	France	Femme	57	2	73	89	22	16	85	79	86	81	13	profession interm&#233diaire	4	33	mari&#233	1	1	86	19	21	18	80	92	85	25	78	93	7	95	36	88	163	130	126	67	-88	-52	-15	60	-12
1695	France	Femme	44	2	50	50	72	82	81	65	28	24	72	profession interm&#233diaire	4	80	autre		4	96	96	100	94	50	50	88	73	50	92	5	2	50	50	164	59	59	0	3	0	-42	15	0
1696	France	Femme	41	2	17	69	11	50	50	28	17	70	19	cadre et profession intellectuelle sup&#233rieure	4	90	concubinage	1	0	54	42	46	50	82	50	73	70	78	15	27	29	0	1	170	72	72	12	-2	-1	63	3	32
1697	France	Homme	33	1	72	73	60	99	81	42	63	43	53	cadre et profession intellectuelle sup&#233rieure	6	41	concubinage	1	0	100	100	100	100			35	40			19	21	50	50	180	63	63	0	-2	0		-5
1698	France	Femme	57	2	70	100	50	53			74		4	artisan, commer&#231ant ou chef d'entreprise	2	100	mari&#233	1	0	100	39	71	77					69	100		78	68	90	170	70	70	61		-22	-31
1699	France	Femme	29	2	63	88	86	80	84	14	72	50	12	profession interm&#233diaire	4	87	mari&#233	1	1	90	100	94	95	72	78	69	73			13	15			169	63	63	-10	-2			-4	-6
1701	France	Femme	22	2	9	68	67	100	74	9	87	91	85	&#233l&#232ve ou &#233tudiant	4	96	concubinage	1	0	87	37	63	64	5	4	80	42	8	63	1	100	8	5	158	58	57	50	-99	3	-55	38	1
1703	France	Femme	47	2						35				cadre et profession intellectuelle sup&#233rieure	5	63	c&#233libataire	2	2	29	79	77	77							66	35			159	53	53	-50	31
1704	France	Femme	35	2	50	70	99	27	67	65	67	50	50	profession interm&#233diaire	5	7	c&#233libataire	2	1	90	9	11	12	50	66	77	50	91	28	14	86	6	50	158	62	62	81	-72	-44	63	27	-16
1705	France	Femme	40	1	27	35	0	50	38	100	8	88	31	profession interm&#233diaire	4	80	mari&#233	1	1	100	18	69	71	2	0	100	84	16	16	4	0	24	24	155	70	70	82	4	0	0	16	2
1707	France	Homme	41	2			22		23	12			6	cadre et profession intellectuelle sup&#233rieure	5	62			0	100	57	57	67	26	22	74	67	29	30	21	25			180	75	75	43	-4		-1	7	4
1708	France	Femme	54	2	80	100	100	0	100	0	70	100	86	cadre et profession intellectuelle sup&#233rieure	4	100	c&#233libataire	2	0	81	0	0	0	5	96	97	0	77	60	3	83	50	73	172	62	63	81	-80	-23	17	97	-91
1709	France	Homme	47	1	70	24	20	77				79	10	ouvrier	2	71	PACS&#233	1	0	67	50	50	50	19	18	68				12		22	19	190	87	90	17		3			1
1714	France	Femme	29	2	0	12	23	50	0	100	0	77	0	ouvrier	5	100	c&#233libataire	2	0	100	100	100	100	36	65	50	50	50	50	21	33	0	0	160	55	55	0	-12	0	0	0	-29
1715	France	Femme	24	2	20	12	2	8	37	100	10	72	6	cadre et profession intellectuelle sup&#233rieure	5	77	c&#233libataire	2	0	53	44	61	69	46	21	88	68	58	37	10	36	16	16	164	62	62	9	-26	0	21	20	25
1716	France	Femme	31	2	60	63	21	83	69	22	69	35	66	cadre et profession intellectuelle sup&#233rieure	6	36	c&#233libataire	2	0	66	77	77	76	40	71	50	35	36	50	8	40	11	33	176	66	66	-11	-32	-22	-14	15	-31
1717	France	Femme	32	2	0	0	0	78	27	100	0	77	0	cadre et profession intellectuelle sup&#233rieure	6	0	PACS&#233	1	0	62	35	50	50	30	31	78	78	26	26	0	0	50	50	177	58	58	27	0	0	0	0	-1
1719	France	Femme	36	2	28	36	33	13	27	86	45	67	0	cadre et profession intellectuelle sup&#233rieure	5	55	concubinage	1	0	76	72	72	86	74	32	80	42	78	28	14	19	10	11	164	72	71	4	-5	-1	50	38	42
1720	France	Homme	34	2	50	72	73	50	65	93	65	75	80	cadre et profession intellectuelle sup&#233rieure	5	85	mari&#233	1	1	73	74	77	76	70	29	77	69	24	18	17	15	50	62	180	67	65	-1	2	-12	6	8	41
1721	France	Femme	51	1	16	88	2	98	4		4	50	79	cadre et profession intellectuelle sup&#233rieure	5	78	c&#233libataire	2	0	87	92	95	92	50	77	50	50	50	50	9	8	4	8	165	55	55	-5	1	-4	0	0	-27
1722	France	Femme	24	2	50	50	0	78	67	41	35	91	28	profession interm&#233diaire	4	100	concubinage	1	0	89	79	86	82	1	70	100	50	0	32	0	0	1	16	158	62	64	10	0	-15	-32	50	-69
1723	France	Homme	33	2	0	0	0	0	1	100	0	73	0	cadre et profession intellectuelle sup&#233rieure	5	100	concubinage	1	1	100	77	76	75	0	0	100	78	0	0	1	98	50	50	184	78	78	23	-97	0	0	22	0
1726	France	Femme	34	2	79	50	50	50	50	50	50	50	50	profession interm&#233diaire	4	80	concubinage	1	1	75	40	50	50	50	50	50	100	50	50	33	70	52	50	164	62	64	35	-37	2	0	-50	0
1727	France	Homme	45	2	50	50	35	44	50	50	50	50	24	cadre et profession intellectuelle sup&#233rieure	5	50	PACS&#233	1	0	39	40	39	41	50	50	50	50	50	50	50	50	50	50	177	65	65	-1	0	0	0	0	0
1730	France	Homme	38	2	74	100	14	87	25	25	83	73	100	artisan, commer&#231ant ou chef d'entreprise	4	100	concubinage	1	0	80	19	35	32	24	72	83	77	85	33	0	79	7	75	170	113	109	61	-79	-68	52	6	-48
1731	France	Femme	36	1	0	0	93	92	88	90	50	96	95	artisan, commer&#231ant ou chef d'entreprise	2	94	PACS&#233	1	2	96	95	1	4	5	94	91	4	1	93	50	3	91	2	170	70	70	1	47	89	-92	87	-89
1733	France	Femme	32	1	50	73	50	71	77	50	63	68	30	cadre et profession intellectuelle sup&#233rieure	5	75	concubinage	1	1	50	50	50	50	50	62	100	90	68	72	50	50	50	50	162	73	75	0	0	0	-4	10	-12
1734	France	Homme	41	2	62	0	0	5	0	100	0	100	0	cadre et profession intellectuelle sup&#233rieure	5	62	mari&#233	1	2	50	50	50	50	50	50	54	50	50	50	21	24	0	0	174	85	88	0	-3	0	0	4	0
1735	France	Homme	40	2	69	80	18	50	76	49	66	51	29	cadre et profession intellectuelle sup&#233rieure	6	64	PACS&#233	1	1	70	50	63	100	50	50	74	73	50	50	27	66	32	65	169	75	75	20	-39	-33	0	1	0
1738	France	Femme	25	2	80	71	50	71	50	89	75	50	0	profession interm&#233diaire	5	87	concubinage	1	0	84	10	10	0	9	26	90	87	10	35	0	100	20	32	168	55	54	74	-100	-12	-25	3	-17
1739	France	Femme	39	1	100	100	100	100	76	75	100	79	75	profession interm&#233diaire	4	100	c&#233libataire	2	1	50	50	50	50	28	77	55	78	26	66	3	0	71	70	160	55	55	0	3	1	-40	-23	-49
1740	France	Femme	35	2	50	50	10	50	24	21	23	74	50	profession interm&#233diaire	4	22	concubinage	1	1	88	50	50	50	50	50	50	50	50	53	50	50	50	50	163	75	75	38	0	0	-3	0	0
1741	France	Homme	27	2	78	82	71	64	71	87	85	75	93	cadre et profession intellectuelle sup&#233rieure	5	35	PACS&#233	1	0	32	63	78	80	35	75	67	31	40	69	7	5	34	81	175	80	83	-31	2	-47	-29	36	-40
1742	France	Femme	47	1	0	0	0	0	0	0	0	0	0	ouvrier	2	0	autre		3	100	0	0	0							0	100	1	4	160	48	48	100	-100	-3
1743	France	Femme	28	2	75	66	45	64	14	50	50	55	17	profession interm&#233diaire	4	50	c&#233libataire	2	0	50	50	50	50	50	64	50	50	50	50	50	68	50	50	175	56	56	0	-18	0	0	0	-14
1745	France	Femme	31	1	50	50	0	50	76	100	50	100	70	cadre et profession intellectuelle sup&#233rieure	5	50	concubinage	1	0	50	74	100	100	50	58	100	91	72	73	0	54	50	50	178	61	61	-24	-54	0	-1	9	-8
1746	France	Femme	29	2	23	63	69	76		100	77	61	23	profession interm&#233diaire	4	56	PACS&#233	1	1	100	100	100	100	23	25	76	57	65	63	8	8	0	1	184	74	74	0	0	-1	2	19	-2
1747	France	Femme	18	1	100	100	50	100	50	69	71	74	52	ouvrier	2	74	c&#233libataire	2	0	96	0	50	79	65	100	68	0	50	100	0	31	50	100	153	40	45	96	-31	-50	-50	68	-35
1748	France	Homme	45	1	78			73	73					cadre et profession intellectuelle sup&#233rieure	6	87	mari&#233	1	1	76	28	29	27	29	54	50	50	23	32	26	50	50	59	169	80	79	48	-24	-9	-9	0	-25
1749	France	Femme	27	1	72	62	59	72	84	42	34	42	20	artisan, commer&#231ant ou chef d'entreprise	1	84	c&#233libataire	2	0	70	23	63	64	30	60	34	20	30	28	28	74	18	71	174	70	70	47	-46	-53	2	14	-30
1750	France	Homme	46	1	50	50	24	50	50	50	61	38	29	profession interm&#233diaire	5	77	mari&#233	1	1	66	30	26	23	29	50	65	36	30	31	32	61	33	50	173	74	74	36	-29	-17	-1	29	-21
1751	France	Femme	34	2	26	27	70	70	39	70	69	36	69	cadre et profession intellectuelle sup&#233rieure	6	98	mari&#233	1	1	73	52	40	60		68			65	23	8	7	2	0	158	89	89	21	1	2	42
1753	France	Femme	30	2	0	72	24	73	36	31	71	63	62	cadre et profession intellectuelle sup&#233rieure	6	100	PACS&#233	1	3	94	66	47	32	20	50	69	58	20	37	10	58	21	21	160	54	55	28	-48	0	-17	11	-30
1755	France	Homme	51	2	76	76	97	77	79	16	77	25	25	artisan, commer&#231ant ou chef d'entreprise	4	98	PACS&#233	1	3	67	50	50		32	76	76	29	78	27	0	20			175	83	83	17	-20		51	47	-44
1758	France	Homme	33	2	22	21	24	68	68	50	50	50	25	cadre et profession intellectuelle sup&#233rieure	6	81	PACS&#233	1	0	50	50	50	50	50	72	50	37	18	81	21	50	50	50	176	67	66	0	-29	0	-63	13	-22
1760	France	Femme	35	2	36	59	35	63	34	76	59	43	14	profession interm&#233diaire	4	61	c&#233libataire	2	0	75	68	68	70	29	44	71	39	40	50	25	25	29	50	181	75	75	7	0	-21	-10	32	-15
1761	France	Femme	33	2	74	69	90	76	50	25	94	50	50	cadre et profession intellectuelle sup&#233rieure	4	38	mari&#233	1	2	75	75	73	75	50	50	50	50	50	50	50	50	65	78	173	89	88	0	0	-13	0	0	0
1762	France	Femme	23	2	43	69	62	3	42	37	62	65	1	&#233l&#232ve ou &#233tudiant	2	68	c&#233libataire	2	0	35	4	3	3	52	79	50	50	62	26	65	79	50	50	160	60	60	31	-14	0	36	0	-27
1763	France	Femme	40	2	16	17	0	94	7	31	9	68	100	profession interm&#233diaire	5	100	c&#233libataire	2	2	100	38	37	37	37	22	70	20	8	4	13	12	65	85	170	120	120	62	1	-20	4	50	15
1764	France	Femme	46	1	47	78	50	50	50	37	50	72	50	ouvrier	2	79	mari&#233	1	1	50	95	94	96	50	80	72	39	65	96	0	0	3	32	153	50	50	-45	0	-29	-31	33	-30
1765	France	Femme	38	2	79	73	0	0	0	0	0	0	0	artisan, commer&#231ant ou chef d'entreprise	4	100	c&#233libataire	2	1	100	100	100	100	0	72	100	100	0	0	2	0	0	0	168	74	75	0	2	0	0	0	-72
1766	France	Femme	33		66	69	83	3	30	50	60	57	3	&#233l&#232ve ou &#233tudiant	4	68	c&#233libataire	2	0	50	50	50	50	69	91	50	50	50	50	50	50	69	69	160	41	39	0	0	0	0	0	-22
1767	France	Femme	37	2	64	55	69	72	70	26	75	72	68	cadre et profession intellectuelle sup&#233rieure	5	98	PACS&#233	1	2	100	76	73	79	82	99	32	16	76	78	3	4	65	78	158	60	60	24	-1	-13	-2	16	-17
1769	France	Femme	28	1	50	56	38	76	79	22	50	50	50	artisan, commer&#231ant ou chef d'entreprise	2	57	PACS&#233	1	0	64	61	81	70	50	50	76	50			38	50			172	57	58	3	-12			26	0
1770	France	Femme	22	2	74	70	55	0	36	0				ouvrier	2		c&#233libataire	2	0	73	57	70	61	13	13	16	11	21	14			1	0	159	43	43	16		1	7	5	0
1771	France	Femme	62	1	50	82	1	96	50	80	74	50	19	profession interm&#233diaire	2	93	mari&#233	1	4	50	50	50	50	30	71	79	23	84	69	4	14	53	64	158	48	48	0	-10	-11	15	56	-41
1774	France	Femme	30	2	28	73	50	50	65	78	73	38	50	ouvrier	4	91	mari&#233	1	1	95	29	72	32	7	49	95	25	7	28	3	76	3	27	170	110	115	66	-73	-24	-21	70	-42
1775	France	Homme	41	2	44	82	94	9	27	30		99	34	profession interm&#233diaire	5	29	PACS&#233	1	1	23	92	93	97	73	12	36	73	50	50	72	18	30	32	192	89	87	-69	54	-2	0	-37	61
1776	France	Femme	32		53	31	0	2	2	100	50	33	0	cadre et profession intellectuelle sup&#233rieure	5	82	c&#233libataire	2	0	85	48	60	38	34	50	75	65	50	75	12	43	3	2	168	54	54	37	-31	1	-25	10	-16
1777	France	Femme	30	2	93	96	98	73	94	7	97	7	50	cadre et profession intellectuelle sup&#233rieure	6	8	c&#233libataire	2	0	89	18	18	21	10	83	95	16	12	20	9	94	0	81	160	80	80	71	-85	-81	-8	79	-73
1778	France	Femme	68	2	4		0							profession interm&#233diaire	5	50	mari&#233	1	0	100	98	96	97									50	50	157	50	50	2		0
1779	France	Femme	24	2	78	77	63	97	8	6	69	70	51	&#233l&#232ve ou &#233tudiant	4	69	c&#233libataire	2	0	90	86	91	88				21						64	168	51	52	4
1781	France	Femme	54	2	74	75	22	13	67	27	27	36	31	profession interm&#233diaire	5	13	mari&#233	1	4	100	81	86	89	78	87	81	39	29	47	15	14	70	81	157	58	56	19	1	-11	-18	42	-9
1782	France	Femme	56	2	87	57	0	3	27	36	35	29	3	profession interm&#233diaire	4	76	mari&#233	1	1	81	77	61	59	21	67	81	18	20	62	12	63	50	70	160	68	70	4	-51	-20	-42	63	-46
1784	France	Femme	27	1	9	95	11	96	96	100	100	96	94	profession interm&#233diaire	4	96	concubinage	1	0	90	20	18	75	20	79	88	73	68	86	17	65	3	5	155	58	55	70	-48	-2	-18	15	-59
1785	France	Femme	21	2	68	69	50		60	24	70	30		&#233l&#232ve ou &#233tudiant	4	88	c&#233libataire	2	0	69	34	31	34	35	63	50	50	43	60	11	27			162	56	56	35	-16		-17	0	-28
1786	France	Femme	46	2	100	73	0	79	100	20	76	0	0	profession interm&#233diaire	4	100	mari&#233	1	1	100	50	50	50	50	77	53	16	50	58	2	1	50	50	167	69	69	50	1	0	-8	37	-27
1787	France	Femme	46	1	59	77		100		50			72	cadre et profession intellectuelle sup&#233rieure	5	69	mari&#233	1	2	65	97	100	100	28		67	50		93		10		65	171	85	85	-32				17
1788	France	Femme	43	2	100	100	95	100	71	0	77	80	0	ouvrier	4	0	concubinage	1	3	92	0	0	0	8	74	100	75	18	50	0	100	50	97	160	57		92	-100	-47	-32	25	-66
1789	France	Femme	32	1	99	98	99	100	99	100	96	98	3	ouvrier	2	98	concubinage	1	2	97	50	50	50	0	50	99	1	3	3	1	6	6	97	164	74	72	47	-5	-91	0	98	-50
1791	France	Femme	27	2	73	63	62	62	0	99	68	72	67	profession interm&#233diaire	5	75	concubinage	1	0	25	90	88	89	73	32	77	67	77	100	69	71	22	69	162	70	72	-65	-2	-47	-23	10	41
1796	France	Femme	27	1	16	18	18	20	20	19	30	19	20	cadre et profession intellectuelle sup&#233rieure	5	63	PACS&#233	1	0	71	72	72	75	25	25	81	81	82	63	17	18	59	58	170	56	56	-1	-1	1	19	0	0
1797	France	Homme	62	2	19	29	11		0	80	73	85		retrait&#233	5	86	mari&#233	1	2	84	84	87	88	13	15	80	81	14	19	0	0	51	52	168	66	66	0	0	-1	-5	-1	-2
1798	France	Femme	30	2	72	97	50	88	87	18	75	65	70	cadre et profession intellectuelle sup&#233rieure	5	80	mari&#233	1	3	74	61	58	65	19	35	72	29	28	27	9	22	50	76	169	68	68	13	-13	-26	1	43	-16
1800	France	Femme	43	2	63	63	0	67	0	68	50	19	73	cadre et profession intellectuelle sup&#233rieure	4	100	mari&#233	1	2	100	20	18	17	5	0	100	50	92	1	0	0	0	0	159	63	63	80	0	0	91	50	5
1801	France	Femme	33	1	94	96	96	98	97	95	97	99	98	profession interm&#233diaire	4	50	PACS&#233	1	0	97	8	50	44	5	92	93	11	8	95	29	73	3	66	156	70	70	89	-44	-63	-87	82	-87
1802	France	Femme	39	2	81	87	50	98	80	24	75	32	50	profession interm&#233diaire	4	64	mari&#233	1	3	98	8	30	50	50	74	50	36	50	50	35	3	11	72	168	73	76	90	32	-61	0	14	-24
1804	France	Femme	66		50	67	0		0	100	50	50		retrait&#233	5	50	veuf	3	0	50	50	50	50	76	79	50	9	20	21	23	22	50	50	162	86	86	0	1	0	-1	41	-3
1805	France	Femme	34	2	20	21	2	18	100	84	8	75	18	cadre et profession intellectuelle sup&#233rieure	5	81	concubinage	1	0	88	89	90	91	12	23	90	90	50	50	9	22	0	0	172	76	78	-1	-13	0	0	0	-11
1808	France	Femme	59	2	50	50	50	50	50	50	50	24	50	ouvrier	2	81	mari&#233	1		100	50	50	50	50	50	36	5	50	73	21	9	63	50	172	104	109	50	12	13	-23	31	0
1813	France	Femme	27	1	31	38	62	73	76	100	39	89	65	profession interm&#233diaire	4	45	concubinage	1	0	89	72	87	86	32	21	52	41	37	61		74	40	37	165	66	66	17		3	-24	11	11
1814	France	Femme	47	2	79	82	56	50	50	37	58	60	50	cadre et profession intellectuelle sup&#233rieure	5	85	mari&#233	1	1	50	65	77	77	50	84	34	50	61	27	37	6	62	85	160	75	75	-15	31	-23	34	-16	-34
1815	France	Femme	38	2				74						profession interm&#233diaire	4	82	c&#233libataire	2	0	100	4	22	20	2		33	35	3	2		73			168	55	55	96			1	-2
1817	France	Femme	29	2	18	16	100	100	87	0	100	0	0	profession interm&#233diaire	2	100	c&#233libataire	2	0	100	2	19	0	3	100	100	35	23	100	0	100	0	0	164	55	56	98	-100	0	-77	65	-97
1818	France	Femme	58	2	72	73	61		35	49	50	50		profession interm&#233diaire	2	75	c&#233libataire	2	0	67	70	73	69	36	73	72	69	50	50	32	34	25	72	165			-3	-2	-47	0	3	-37
1819	France	Femme	42	2	70	76	70	75	78	71	63	50	33	cadre et profession intellectuelle sup&#233rieure	4	97	c&#233libataire	2	0	100	0	13	10	5	98	99	21	6	65	6	70	6	69	165	67	66	100	-64	-63	-59	78	-93
1820	France	Femme	25	2	73	66	17	79	0	83	65	100	24	ouvrier	2	16	PACS&#233	1	1	83	82	87	100	0	16	100	63	50	53	15	15	69	83	164	52	52	1	0	-14	-3	37	-16
1821	France	Homme	44	2	50	67	50	75	50	50	50	50	50	profession interm&#233diaire	4	71	c&#233libataire	2	0	86	70	72	73	50	61	47	50	37	50	21	35	6	0	165	48	48	16	-14	6	-13	-3	-11
1822	France	Femme	58	2	100	100	100	54	100	100	100	100	54	profession interm&#233diaire	2	100	mari&#233	1	0	77	0	2	0	50	50	72	0	100	100	0	100	50	50	158	72	74	77	-100	0	0	72	0
1823	France	Femme	60	2	56			74	66	19			81	cadre et profession intellectuelle sup&#233rieure	5	76	veuf	3	2	87	66	70	72										60	163	76	77	21
1824	France	Homme	24	2	86	79	30	100	74	27	68	81	76	profession interm&#233diaire	4	93	concubinage	1	0	100	20	29	88	8	75	87	25	17	20	8	20	8	81	179	59	61	80	-12	-73	-3	62	-67
1825	France	Femme	32	2	64	72	87	44	60	67	67	46	28	profession interm&#233diaire	4	64	concubinage	1	1	64	33	60	60	79	80	33	33	68	70	20	36	67	73	165	85	85	31	-16	-6	-2	0	-1
1826	France	Femme	43	2	85	84	61		34	31	67	50	66	profession interm&#233diaire	4	73	PACS&#233	1	0	67	16	39	34	15	67	74	59	22	37	33	61	24	78	162	107	107	51	-28	-54	-15	15	-52
1828	France	Femme	37	2	77	75	84	33	81	27	77	19	4	artisan, commer&#231ant ou chef d'entreprise	4	94	PACS&#233	1	2	86	20	14	21	80	89	28	13	20	39	5	36	77	79	164	110	112	66	-31	-2	-19	15	-9
1829	France	Femme	42	1	85	90	71	100	82	13		16	71		2	25	autre		2	68	97	97	99	71	97	50	36	56	100	4	1	0	28	158	77	80	-29	3	-28	-44	14	-26
1830	France	Femme	43	2	62	61	50	56	46	46	58	33	33	profession interm&#233diaire	4	82	mari&#233	1	3	89	31	31	37			63	37	74	32	5	60		61	158	60	60	58	-55		42	26
1833	France	Femme	46	2	100	95	50	100	92	34	81	80	85	profession interm&#233diaire	2	68	c&#233libataire	2	0	55	22	18	76	16	70	50	14	4	28	11	88	50	65	173	157	155	33	-77	-15	-24	36	-54
1835	France	Femme	32	2	100	97	77	77	75	13	89	32	69	profession interm&#233diaire	4	20	mari&#233	1	2	81	50	83	81	26	28	61	50	25	34	25	24	17	69				31	1	-52	-9	11	-2
1836	France	Femme	27	1	27	72	1	95	79	78		25	100	profession interm&#233diaire	4	72	c&#233libataire	2	0	87	15	22	20	25		61		29	25	19	71	24	34	170	90	83	72	-52	-10	4
1837	France	Femme	33	2	64	0	0	0	0	81	5	100	3	cadre et profession intellectuelle sup&#233rieure	4	76	PACS&#233	1	0	73	75	74	75	70	29	32	75	68	27	28	27	0	0	168	56	54	-2	1	0	41	-43	41
1838	France	Femme	47	2	50	50	24	0	3	100	50	50	3	profession interm&#233diaire	5	70	c&#233libataire	2	0	74	50	50	22	50	50	73	50	50	50	50	73	3	2	169	52	52	24	-23	1	0	23	0
1839	France	Femme	54		100	100	100	100	100	0	100	50	50	ouvrier	2	50	mari&#233	1	3	100	50			0	100	93	0	0	100	3	79	0	100	147	100	108	50	-76	-100	-100	93	-100
1840	France	Femme	37	2	75	67	0	50	41	50	72	61	76	cadre et profession intellectuelle sup&#233rieure	5	47	mari&#233	1	0	48	66	74	72	50	50	72	50	65	43	19	24	10	58	169	114	116	-18	-5	-48	22	22	0
1841	France	Femme	34	2	71	69	66	72	44	45	69	64	63		1	65	c&#233libataire	2		62	64	65	65	69	70	34	35	61	63	29	30	58	64	168	54	54	-2	-1	-6	-2	-1	-1
1842	France	Femme	35	2	66	66	50	74	50	50	50	50	26	ouvrier	4	77	PACS&#233	1	0	100	72	80	66	78	50	47	72	85	50	0	21	50	67	164	76	74	28	-21	-17	35	-25	28
1843	France	Femme	45	1	28	20	0	100	100	11	17	34	81	cadre et profession intellectuelle sup&#233rieure	5	80	PACS&#233	1	2	63	97	100	57	50	73	50	77	50	77	32	65	52	50	159	46	46	-34	-33	2	-27	-27	-23
1844	France	Femme	59	2	84		14	34	38	43	21	73	38	profession interm&#233diaire	2	100	mari&#233	1	2	100	0	6	17	5	99	100	0	0	0	2	10	7	5	157	73	75	100	-8	2	0	100	-94
1845	France	Homme	37	2	57	39	5		50	14	19	50	36	profession interm&#233diaire	4	50	concubinage	1	0	50	50	50	50	51	50	50	68	50	50	50	50	50	50	170	55	55	0	0	0	0	-18	1
1847	France	Femme	39	1	100	92	0	95	100	8	91	14	91	cadre et profession intellectuelle sup&#233rieure	5	50	mari&#233	1	1	50	97	96	100	25	89	81	25	24	90	11	0	28	50	163	60	60	-47	11	-22	-66	56	-64
1848	France	Homme	41	2	78	25	26	27	49	30	50	36	21	profession interm&#233diaire	4	98	c&#233libataire	2	0	50	50	50	50	50	50	50	38	31	31	24	22	9	10	178	155	160	0	2	-1	0	12	0
1850	France	Femme	32	1	81	81	72	76	50	40	69	65	59	profession interm&#233diaire	4	94	mari&#233	1	1	100	67	68	66	40	62	74	23	52	64	0	12	45	65	168	61	61	33	-12	-20	-12	51	-22
1851	France	Femme	37	2	70	71	67	78	41	39	30	79	35	profession interm&#233diaire	5	100	PACS&#233	1	2	100	35	37	40	32	35	65	46	26	28	29	69	24	69	167	82	82	65	-40	-45	-2	19	-3
1852	France	Femme	31	2	25	62	73	26	50	42	62	8	50	cadre et profession intellectuelle sup&#233rieure	5	63	c&#233libataire	2	0	68	68	82	78	50	50	50	50	29	72	33	68	17	17	178	100	105	0	-35	0	-43	0	0
1853	France	Femme	39	2	75	100	77	100	100	88	100	87	75	profession interm&#233diaire	2	34	mari&#233	1	2	59	37	97	90	28	75	70	30	44	57	29	28	14	81	169	83	85	22	1	-67	-13	40	-47
1854	France	Homme	51	2		73	50	50	50	50	74	24	50	cadre et profession intellectuelle sup&#233rieure	5	97	c&#233libataire	2	0	100	68	69	70	73	24	74	25	72	28	31	72	20	72	173	78	80	32	-41	-52	44	49	49
1855	France	Femme	50	2	100	99	27	100	86	100	100	100		profession interm&#233diaire	4	100	mari&#233	1	2	81	25	18	18	26	83	91	62	50	87	0	42	65	55	155	63	59	56	-42	10	-37	29	-57
1856	France	Homme	32	2	7	3	69	67	68	68	32	72	28	cadre et profession intellectuelle sup&#233rieure	5	70	c&#233libataire	2	0	67	69	64	70	34	28	75	36	32	30	17	21	12	16	193	78	78	-2	-4	-4	2	39	6
1857	France	Femme	24	2	50	56	80	80	15	72	65	66	69	ouvrier	4	91	PACS&#233	1	0	84	25	50	50	50	77	82	50	50	50	0	0	2	0	161	64	64	59	0	2	0	32	-27
1858	France	Femme	45	1	100	100	88	94	97	78	87	63	99	profession interm&#233diaire	4	50	mari&#233	1	1	78	100	100	100	26	68	51	18	19	82	0	0	50	50	155	52	56	-22	0	0	-63	33	-42
1859	France	Homme	26	2	82	38	18	77	39	33	64	64	0	profession interm&#233diaire	2	100	c&#233libataire	2	0	82	72	73	78	13	12	73	73	14	15	20	21	44	53	165	55	55	10	-1	-9	-1	0	1
1861	France	Femme	55	2	24	24	23	32	16	64	24	84	4	cadre et profession intellectuelle sup&#233rieure	6	65	mari&#233	1	2	86	72	79	83	15	20	80	85	50	50	13	14	50	50	173	78	78	14	-1	0	0	-5	-5
1862	France	Femme	30	1	74	77	75	97	68	74	72	78	98	profession interm&#233diaire	4	50	mari&#233	1	2	59	26	23	26	3	38	95	19	19	20	4	81	15	70	174	64	64	33	-77	-55	-1	76	-35
1865	France	Femme	30	2	68	69	40	36	81	70	72	70	70	cadre et profession intellectuelle sup&#233rieure	6	77	concubinage	1	1	76	43	50	50	29	57	68	50	69	50	15	50	50	50	169	73	73	33	-35	0	19	18	-28
1867	France	Homme	35	2	38	68	33	76	26	62	66	73	37	profession interm&#233diaire	1	69	concubinage	1	2	37	66	67	74	67	17	58	39	31	63	45	29	27	80	182	78	78	-29	16	-53	-32	19	50
1868	France	Femme	53	1	50	50	33	74	50	50	50	50	50	profession interm&#233diaire	2	50	PACS&#233	1	0	88	87	86	94	26	30	94	93	6	3	7	5	70	68	159	62	62	1	2	2	3	1	-4
1869	France	Homme	30	2	76	78	66	79	50	46	56	73	3	profession interm&#233diaire	4	80	PACS&#233	1	1	59	41	60	40	20	41	91	80	17	28	40	13	19	22	171	64	64	18	27	-3	-11	11	-21
1870	France	Femme	29	2	83	90	86	100	30	36	83	67	50	ouvrier	2	51	concubinage	1	0	83	73	76	69	28	59	83	45	58	62	4	33	70	94	155	57		10	-29	-24	-4	38	-31
1871	France	Homme	33	2	77	72	76	74	83		80		6	cadre et profession intellectuelle sup&#233rieure	6	100	c&#233libataire	2	0	76	31	39	34	64	62	52	50	68	88	22		65	80	176	70	75	45		-15	-20	2	2
1872	France	Femme	35	2	76	75	59	100	50	40	83	34	81	cadre et profession intellectuelle sup&#233rieure	6	67	PACS&#233	1	0	84	84	85	93	27	33	95	59	33	65	100	19	22	59	165	83	83	0	81	-37	-32	36	-6
1874	France	Femme	45	2	42	34	7	22	23	84	26	74	30	profession interm&#233diaire	5	78	c&#233libataire	2	0	86	70	82	84	16	49	85	66	42	42	1	20	4	4	162	62	63	16	-19	0	0	19	-33
1875	France	Homme	46	2	78	81	61	88	82	72	85	81	71	profession interm&#233diaire	2	70	c&#233libataire	2	0	67	60	67	69	42	42	78	74	50	50	18	68	30	76	174	61	60	7	-50	-46	0	4	0
1878	France	Femme	36	2	98	90	73	72	39	32	76	100	20	cadre et profession intellectuelle sup&#233rieure	4	100	mari&#233	1	3	81	89	83	92	50	50	57	31	79	77	9	12	22	70	170	56	56	-8	-3	-48	2	26	0
1879	France	Femme	37	2	12	84	76	100	50	78	89	50	100	profession interm&#233diaire	4	78	c&#233libataire	2	1	100	100	100	100	50	50	50	50	50	74	50	0	0	0	165	68	64	0	50	0	-24	0	0
1882	France	Femme	54	2	93	77	94	82	43	20	73	50	50	ouvrier	2	88	mari&#233	1		83	85	87	87	50	50	50	50	50	50	26	29	19	20	170			-2	-3	-1	0	0	0
1884	France	Femme	56	1	48	36	30	99	73	97	88	84	25		2	82	mari&#233	1	3	100	13	50	50	3	100	83	22	0	80	4	79	30	81	150	55	58	87	-75	-51	-80	61	-97
1885	France	Femme	39	1	25	82	78	97	86	98	78	50	80	profession interm&#233diaire	4	90	mari&#233	1	3	78	25	50	50	17	50	87	50	13	14	11	9	0	0	168	80	82	53	2	0	-1	37	-33
1886	France	Femme	41	1	100	99	96	100		100	100	100	100	profession interm&#233diaire	4	100	mari&#233	1	2	100	0	21	15	50	98	100	0	97	30	0	30	0	100	176	66	66	100	-30	-100	67	100	-48
1887	France	Femme	30	2	50	50	50	50	50	50	50	50	0	cadre et profession intellectuelle sup&#233rieure	5	100	PACS&#233	1	0	90	24	73	75	50	50	50	50	50	50	50	50	5	73	163	64	64	66	0	-68	0	0	0
1888	France	Homme	26	2	100	22	4	50	82	64		24		&#224 la recherche d'un emploi	2	55	c&#233libataire	2	1	50	22	31	34	57	58	55	50	58	35	33	66			160	56	57	28	-33		23	5	-1
1889	France	Femme	40	1	19	14	10	11	5	27	6	5	1	ouvrier	2	11	mari&#233	1	2	59	60	62	63	6	5	22	74	78	6	3	72	2	3	160	80	77	-1	-69	-1	72	-52	1
1890	France	Femme	66	2	3	4	1	2	50	50	50		50	retrait&#233	4	52	mari&#233	1	2	50	50	50	50	50	50	50	50	50	50	2	0	50	50	161	95	97	0	2	0	0	0	0
1891	France	Femme	49	1	90	90	89	99	72	90	97	86	60	ouvrier	2	50	c&#233libataire	2		92	76	73	72	50	14	50	26	50	89	23	50	4	75	162	69	67	16	-27	-71	-39	24	36
1895	France	Femme	22	1	36	84	65	94	93	82	88	84	40	profession interm&#233diaire	2	84	concubinage	1	0	61	3	37	50	29		81	35	27	72	23	83		73	157	52	53	58	-60		-45	46
1896	France	Femme	36	1	83	87		76	76	79	79	80	71	profession interm&#233diaire	4	77	PACS&#233	1	2	33	34	33	32	74	71	69	67	67	67	71	73	5	2	165	75	75	-1	-2	3	0	2	3
1899	France	Femme	28	2	16	12	99	25	17	10	87	100	14	&#233l&#232ve ou &#233tudiant	2	100	PACS&#233	1	1	100	0	0	0	0	86	100	0	13	51	0	99	0	3	166	71	76	100	-99	-3	-38	100	-86
1900	France	Homme	32	2	83	16	50							cadre et profession intellectuelle sup&#233rieure	5	100	PACS&#233	1	0	100	0	1	0	50								50	50	174	66	67	100		0
1901	France	Homme	32	2	100	100	100	100	100	100	100	0	100	cadre et profession intellectuelle sup&#233rieure	6	100	mari&#233	1	1	0	1	0	0	19	8	25	0	67	66	0	63	70	100	173	64	64	-1	-63	-30	1	25	11
1902	France	Femme	52	1	27	50	28	47	48	47	31	50	37	cadre et profession intellectuelle sup&#233rieure	6	88	mari&#233	1	2	90	72	50	50	50	29	50	32	50	50	50	27	50	50	151	45	45	18	23	0	0	18	21
1904	France	Femme	43	1	90	90	92	100	87	92	78	12	12	ouvrier	4	98	c&#233libataire	2	2	92	25	50	50	0	87	100	91	0	0	2	18	0	21	168	58	58	67	-16	-21	0	9	-87
1906	France	Homme	43	2	70	86	73	50	100	12	80	38	100	cadre et profession intellectuelle sup&#233rieure	5	83	mari&#233	1	2	100	84	100	100	82	12	85	64	97	31	10	22	16	62	160	73	74	16	-12	-46	66	21	70
1907	France	Femme	39	2	83	100	98	100	73	17	100	23		profession interm&#233diaire	4	100	mari&#233	1	3	100	0	23	19	26	79	84	20		83	13	16	72	100	160	59		100	-3	-28		64	-53
1908	France	Femme	25	2	100	99	3	1	100	2	99	0	100	&#224 la recherche d'un emploi	2	98	c&#233libataire	2	4	99	0	1	0	1	97	100	3			3	99	3	96	170	92	92	99	-96	-93		97	-96
1910	France	Femme	36	2	86	82	69	98	100	100	79	69	59	profession interm&#233diaire	4	90	mari&#233	1	3	97	70	73	57	19	50	91		85		5		16	69	170	78	78	27		-53			-31
1911	France	Femme	35	2	11	13	69	50	15	11	55	90	8	profession interm&#233diaire	4	69	concubinage	1	0	84	46	7	50	20	46	93	11	15	90	50	87	8	13	157	78	79	38	-37	-5	-75	82	-26
1912	France	Homme	26	1	20	61	64	62	31	89	61	40	34	profession interm&#233diaire	4	23	c&#233libataire	2	0	68	75	78	70	67	76	28	52	30	27	33	66	34	34	165	68	68	-7	-33	0	3	-24	-9
1913	France	Femme	54	2	50	26	0	0	3	83	2	5	0	&#224 la recherche d'un emploi	4	73	concubinage	1	0	79	81	78	78	15	50					22	19	50	50	168	65	65	-2	3	0			-35
1914	France	Homme	37	2	99	100	14	8	18	88	85	68	0	profession interm&#233diaire	4	100	concubinage	1	0	100	26	28	22	50	50	71	25	69	66	0	70	70	82	170	68	71	74	-70	-12	3	46	0
1915	France	Homme	41	2	19	9	22	11	0	1	0	25	4	profession interm&#233diaire	4	85	c&#233libataire	2	0	95	29	28	30	30	15	87	60				67	1	0	182	120	120	66		1		27	15
1916	France	Femme	34	2	100	100	100	50	100	100	100	92	50	&#233l&#232ve ou &#233tudiant	5	100	mari&#233	1	2	50	50	50	50	50	73	50	33	50	78	50	1	62	88	168	52	53	0	49	-26	-28	17	-23
1917	France	Femme	38	2	100	100	83	100	100	89	100	64	87	cadre et profession intellectuelle sup&#233rieure	6	100	PACS&#233	1	2	100	31	14	71	20	81	85	72	25	72	0	0	71	100	169	90	88	69	0	-29	-47	13	-61
1920	France	Femme	37	2	80	82	64		61	39	59		71	profession interm&#233diaire	5	82	PACS&#233	1	1	78	59	63	58	61	39	73	42	72	37	13	4	64	69	167	65	66	19	9	-5	35	31	22
1921	France	Femme	44	2	56	62	97	100	92	69	72	67	76	profession interm&#233diaire	4	100	mari&#233	1	3	97	79	75	79	82	79	36	34	66	68	30	7	68	66	160	85	85	18	23	2	-2	2	3
1922	France	Femme	34	2	0	0	0	50	1	50	3	50	72		2	77	c&#233libataire	2	0	50	50	50	100	67	27	50	50	94	50	100	50	50	50	169	87	82	0	50	0	44	0	40
1923	France	Femme	48	2	14	1	0	1	31	100	16	88	27	profession interm&#233diaire	4	60	autre		2	28	23	31	29	24	27	22	25	22	25	34	28	16	12	170	99	97	5	6	4	-3	-3	-3
1925	France	Femme	50	2	0	0	0	0	100	37	0	0	70	cadre et profession intellectuelle sup&#233rieure	4	0	PACS&#233	1	3	99	96	96	98	52	52					0	0	0	0	158	68	68	3	0	0			0
1929	France	Femme	43	2	81	86	50	50	68	34	85	25	69	cadre et profession intellectuelle sup&#233rieure	6	72	concubinage	1	2	87	71	83	84	19	81	73	34	26	71	8	13	21	79	163	66	64	16	-5	-58	-45	39	-62
1931	France	Femme	35	2	50	75	52	50	77	72	77	76	50	ouvrier	4	50	PACS&#233	1	1	91	50	50	50	50	78	75	22	50	50	80	33	50	57	168	66	66	41	47	-7	0	53	-28
1933	France	Femme	30	1	72	69		69	100	21	50	52	24	profession interm&#233diaire	2	71	concubinage	1	2	83	26	50	50	13	31	76	65	26	25	15	25	63	76	160	90	89	57	-10	-13	1	11	-18
1935	France	Femme	25	1	76	100	64	100	100	100	100	100	100	profession interm&#233diaire	4	99	concubinage	1	0	100	28	16	66	27	80	100	26	100	99	0	11	0	0	167	82	32	72	-11	0	1	74	-53
1936	France	Femme	49		76	50	79	94	100	50	50	50	81	profession interm&#233diaire	4	100	mari&#233	1	1	100	100	100	100	50	50	94	50	50	50	0	0	2	50	155	74	74	0	0	-48	0	44	0
1940	France	Femme	30	1	70	89	64	88	57	17	83	26	56	profession interm&#233diaire	4	74	concubinage	1	1	90	60	59	56	50	50	52	27	50	45	30	38	76	89	165	78	80	30	-8	-13	5	25	0
1941	France	Femme	30	2	66	50	24	76	64	76	62	50	72	&#233l&#232ve ou &#233tudiant	6	50	concubinage	1	0	70	71	38	50	50	67	40	40	50	50	24	11	50	59	154	39	39	-1	13	-9	0	0	-17
1942	France	Femme	46	2	29	29	98	21	27	66	29	70	23	profession interm&#233diaire	4	72	mari&#233	1	3	100	92	99	100	33	37	79	81	33	37	17	17	50	50	171	69	71	8	0	0	-4	-2	-4
1943	France	Femme	38	1	77	67	65	84	78	28	71		73	profession interm&#233diaire	5	78	mari&#233	1	3	91	78	88	88	70	80	73	83	73	74	17	16	70	75	175	74	76	13	1	-5	-1	-10	-10
1944	France	Homme	41	2	63	71	71	100		50	83	65	98	ouvrier	2	100	mari&#233	1	2	43	44	46	45	64	62					34		56	75	180	78	79	-1		-19			2
1945	France	Femme	30	2	73	82	50	0	100	15	81	2	50	&#224 la recherche d'un emploi	2	87	mari&#233	1	0	100	50	50	45	50	100	50	100	50	50	2	49	21	71	169	52	52	50	-47	-50	0	-50	-50
1946	France	Femme	41	2	76	22	2		2	56	54	25	2	profession interm&#233diaire	4	68	c&#233libataire	2	0	78	77	76	93	18		87	56	1	1	3	15	60	61	180	99	96	1	-12	-1	0	31
1948	France	Femme	39	2	26	21	0	100	0	0	0	58	0	&#233l&#232ve ou &#233tudiant	4	0	mari&#233	1	0	69	74	72	76											157	50	50	-5
1950	France	Femme	48	1	84	100	25	100	50	100	100	97	100	profession interm&#233diaire	4	77	mari&#233	1	3	100	26	41	27	15	82	92	30	50	50	21	65	33	100	173	85	85	74	-44	-67	0	62	-67
1951	France	Femme	35	2	94	97	0	97	1	0	100	50	0	ouvrier	4	97	concubinage	1	1	96	50	50	50	0	100	100	23	50	79	0	50	3	100	156	78	78	46	-50	-97	-29	77	-100
1952	France	Femme	39	2	93	74	75	74	24	36	67	31	45	cadre et profession intellectuelle sup&#233rieure	5	98	concubinage	1	1	74	38	38	42	63	79	45	10	30	27	28	29	60	80	169	61	63	36	-1	-20	3	35	-16
1953	France	Femme	19	2	72	72	50		67	41	71	80	2	&#233l&#232ve ou &#233tudiant	4	99	autre		0	62	32	29	28	62	1	69	100	63	27	0	59	50	50	168	78	75	30	-59	0	36	-31	61
1956	France	Homme	35	2	50	31	71	50	0	0	71	73	11	&#224 la recherche d'un emploi	5	100	c&#233libataire	2	0	81	32	34	41	67	97	62	16	19	80	26	50	50	68	171	84	88	49	-24	-18	-61	46	-30
1957	France	Homme	38	2	4	0	54	5	0	71	56	64	3	ouvrier	2	100	c&#233libataire	2	0	100	95	100	100	52	87	93	85			0	68	80	82	170	80	80	5	-68	-2		8	-35
1958	France	Femme	40	2	56	50	12	17	21	50	50	74	30	cadre et profession intellectuelle sup&#233rieure	6	80	c&#233libataire	2	2	94	10	12	54	9	56	80	50	50	22	10	21	43	50	170	57	57	84	-11	-7	28	30	-47
1959	France	Homme	40	1	62	67	66	72	32	75	65	31	64	cadre et profession intellectuelle sup&#233rieure	5	92	c&#233libataire	2	0	50	50	50	50	63	66	72	40	50	50	41	69	37	62	181	93	95	0	-28	-25	0	32	-3
1961	France	Femme	32	2	74	67	69	72	23	26	27	23	21	profession interm&#233diaire	4	83	mari&#233	1	2	90	87	82	87	79	79	80	78		77	29	79	17	50	164	55	57	3	-50	-33		2	0
1962	France	Femme	36	2	85	72	70		100		72	50		profession interm&#233diaire	4	84	PACS&#233	1	2	75	27	62	37	65	63	73	71	26	42	32	61	92	100	168	62	63	48	-29	-8	-16	2	2
1963	France	Femme	29	1	72	75	23	76	75	72	72	68	25	profession interm&#233diaire	4	82	c&#233libataire	2	0	65	64	32	65	71	62	0	17	0	32	0	77	13	27	168			1	-77	-14	-32	-17	9
1964	France	Femme	53	2	68	65	50	78	15	70	65	50	11	profession interm&#233diaire	4	22	mari&#233	1	6	89	40	49	43	17		80	64	16	18	19	24	24	60	168	83	82	49	-5	-36	-2	16
1965	France	Femme	47	2	50	50	0	100	50	50	26	78	50	profession interm&#233diaire	5	0	c&#233libataire	2	0	50	50	50	50	0	0	98	81	0	0	0	19	16	15	155	96	96	0	-19	1	0	17	0
1969	France	Femme	28	2	50	84	50	96	50	50	77	86	50	profession interm&#233diaire	4	77	PACS&#233	1	0	81	16	50	18	50	50	83	21	50	50	50	82	50	50	170	57	57	65	-32	0	0	62	0
1970	France	Femme	32	2	74	75	33	50	37	78	65	80	50	cadre et profession intellectuelle sup&#233rieure	5	74	mari&#233	1	2	75	39	73	76	27	50	80	78	26	53	0	0	21	50	150	44	44	36	0	-29	-27	2	-23
1972	France	Femme	30	1	16	90	75	97	88	7	100	8	76	ouvrier	2	40	concubinage	1	1	81	16		31	5	83	87	0	17	28	13	14	33	86	164	55	55	65	-1	-53	-11	87	-78
1974	France	Homme	74		16	15	1		62	10	12	11		retrait&#233	6	74	mari&#233	1	4	79	74	74	73	0	14	75	66	3	3	5	4	22	31	181	105	105	5	1	-9	0	9	-14
1975	France	Femme	31	2	71	65	37			79	82	64	23	cadre et profession intellectuelle sup&#233rieure	4	100	concubinage	1	1	98		71	77		50	56	40	78	24	20	37	22	67	157	56	58		-17	-45	54	16
1976	France	Femme	35	2	66	73	21	62	50	78	81		25	cadre et profession intellectuelle sup&#233rieure	5	80	c&#233libataire	2		82	81	81	80	50	50	50	50	64	19	0	23	47	64	164	67	65	1	-23	-17	45	0	0
1977	France	Femme	37	2		63		70	75	70	76	36	67	cadre et profession intellectuelle sup&#233rieure	5	72	c&#233libataire	2	0	33	32	32	32				35	50		62	40			156	50		1	22
1978	France	Femme	45	2	100	100	100	98	50	27	76	50	9	profession interm&#233diaire	2	50	mari&#233	1	1	74	77	82	82	91	77	92	50	50	50	50	50	50	50	178	64	64	-3	0	0	0	42	14
1979	France	Femme	44	1	80	76	25	96	38	29	76	66	65	profession interm&#233diaire	4	31	c&#233libataire	2	1	90	16	21	21	5	50	96	50	31	75	38	67	11	85	170	80	82	74	-29	-74	-44	46	-45
1980	France	Homme	19	2	2	0		2	4	100	3	100	0	&#233l&#232ve ou &#233tudiant	2	2	c&#233libataire	2	0	100	100	100	99	3	0	100	100	63	0	1	1	0	69	179	55	55	0	0	-69	63	0	3
1982	France	Femme	43	2		72	23	13	59	85	88	33	50	artisan, commer&#231ant ou chef d'entreprise	4	92	concubinage	1	1	92	7	4	2	16	83	92	10	15	18	15	50	50	88	169	64	62	85	-35	-38	-3	82	-67
1983	France	Femme	45	1	23	15	11	50	50	50	0	50	50	profession interm&#233diaire	4	100	mari&#233	1	4	50	50	50	50	50	50	50	50	50	50	0	0	50	50	168	110	112	0	0	0	0	0	0
1984	France	Femme	26	2	0				0	0			0	ouvrier	4	77	PACS&#233	1	0	75	62	69	40	62	41	66	24							163	82	80	13				42	21
1985	France	Femme	50	2	81	100	100	100	4	40	83	50	50	artisan, commer&#231ant ou chef d'entreprise	4	90	mari&#233	1	2	98	19	10	13	73	75	50	23	77	20	13	67	43	74	172	52	51	79	-54	-31	57	27	-2
1987	France	Homme	41	2	77	50	73	50	64	85	23	70	10	cadre et profession intellectuelle sup&#233rieure	6	77	PACS&#233	1	2	90	63	81	76	23	25	77	77	30	63	16	10	14	23	180	86	87	27	6	-9	-33	0	-2
1988	France	Femme	38		60	92		69	50	22		36		ouvrier	4	100	PACS&#233	1	2	95	30	36	24	25	84	77	29	32	75	14	74	22	70	155	52	52	65	-60	-48	-43	48	-59
1989	France	Femme	42	2	68	64	50	82	66	24	51		37	artisan, commer&#231ant ou chef d'entreprise	5	100	mari&#233	1	1	76	83	67	83				54					20	50	178	69	73	-7		-30
1990	France	Homme	41	2	65	91	52	50	30	66	70	70	50	cadre et profession intellectuelle sup&#233rieure	5	84	mari&#233	1	2	71	50	50	50	50	50	62	37	50	53	21	62	63	75	183	78	78	21	-41	-12	-3	25	0
1991	France	Femme	27	2	82	67	61		42	33	66	31		&#233l&#232ve ou &#233tudiant	4	80	c&#233libataire	2	0	86	77	72	74			79	36			3	7		59	166	70	70	9	-4			43
1992	France	Femme	38	2	75	76	78	79	100	0	77	79	22	ouvrier	4	100	c&#233libataire	2	1	100	21	49	34	41	100	69	29	68	74	0	71	21	65	157	62	60	79	-71	-44	-6	40	-59
1993	France	Femme	42	2	20	28	16	18	14	81	3	52	18	cadre et profession intellectuelle sup&#233rieure	5	78	mari&#233	1	2	85	86	66	87	15	16	49	61	72	22	4	4	3	1	172	58	58	-1	0	2	50	-12	-1
1994	France	Femme	37	2	37	77	75	77	80	79	62	69	63	cadre et profession intellectuelle sup&#233rieure	6	88	concubinage	1	2	75	69	79	88	50					50	28	14	61	71	168	67	64	6	14	-10
1995	France	Femme	24	2	82	85	23	27	50	74	97	50	4	&#224 la recherche d'un emploi	5	100	PACS&#233	1	0	50	50	50	50	15	25	73	69	16	19	86	77	23	85	175	125	121	0	9	-62	-3	4	-10
1996	France	Homme	30	1	19	59	50	50	6	62	25	82	7	profession interm&#233diaire	4	62	mari&#233	1	0	83	94	94	97	27	27	93	67	32	46	2	4	3	0	187	85	85	-11	-2	3	-14	26	0
1997	France	Femme	28	2	14	81	0	50	12	50	64	50	19	&#233l&#232ve ou &#233tudiant	6	86	PACS&#233	1	1	85	87	100	100	50	50	55	37	50	61	0	0	22	52	161	63	61	-2	0	-30	-11	18	0
1998	France	Homme	29	2	14	9	0	10	0	0	11	0	0	profession interm&#233diaire	5	89	PACS&#233	1	1	84	84	85	85	66	7	63	85		74	18	19	15	14	165	52	52	0	-1	1		-22	59
2000	France	Femme	35	1	61	65	24	79	79	64			69	cadre et profession intellectuelle sup&#233rieure	4	73	mari&#233	1	1	85	100	89	98	54	67	50	50	50	67	50	27	66	67	153	58	58	-15	23	-1	-17	0	-13
2001	France	Femme	30	1	74	73	60	77	50	67	83	50		profession interm&#233diaire	4	85	mari&#233	1	2	100	79	87	86	51	97	50	61			1	18	89	90	164	73	73	21	-17	-1		-11	-46
2003	France	Femme	38	2				68		37			50	profession interm&#233diaire	4		mari&#233	1	3	94	60	65	60											154	54	56	34
2004	France	Femme	27	2	65	56	38	50	41	50				ouvrier	2	76	concubinage	1	0	100	100	84	81	74	36	61	60	26	27	0	40	2	3	155	48	50	0	-40	-1	-1	1	38
2005	France	Femme	43	1		69	17	71		23			21	cadre et profession intellectuelle sup&#233rieure	6	84	mari&#233	1	4	77	65	65	80					61	85		66			169	51	51	12			-24
2006	France	Femme	41	2	100	18	20	100	17	100	13	100	0	&#224 la recherche d'un emploi	2	100	c&#233libataire	2	0	100	0	0	0	0	100	100	0	0	98	0	100	0	100	160	70	70	100	-100	-100	-98	100	-100
2007	France	Homme	44	2	94	100	0	0	0	37	81	88	0	ouvrier	4	97	PACS&#233	1	2	81	82	90	89	0	50	76	28	80	37	29	24	0	81	183	99	97	-1	5	-81	43	48	-50
2010	France	Femme	62	2	82	64	1	75	0	25	91	20	0	profession interm&#233diaire	2	100	c&#233libataire	2		100	35	36	39	50	51	74	72	64	37	1	62	10	16	166	73	72	65	-61	-6	27	2	-1
2012	France	Femme	37	2	73	74	5		64	25	83	61		ouvrier	2	99	concubinage	1	0	63	12	13	0	22	64	87	40	18	24	15	100	22	70	173	103	106	51	-85	-48	-6	47	-42
2013	France	Femme	56	2	75	78	80	50	79	96	83	82	50	ouvrier	2	80	mari&#233	1	0	96	6	3	8	50	78	70	23	32	94	23	82	22	82	163	106	110	90	-59	-60	-62	47	-28
2014	France	Femme	44	2	100	67	31	81	76	85	76	35	50	&#224 la recherche d'un emploi	2	74	c&#233libataire	2	1	100	100	100	100	50	50	50	50	50	50	50	50	22	76	170	87	88	0	0	-54	0	0	0
2015	France	Femme	25	2	100	100	69	100	74	81	100	50		&#224 la recherche d'un emploi	2	83	mari&#233	1	1	100	100	100	100	58	76	84	33	39	70	33	60	61	88	165	63	64	0	-27	-27	-31	51	-18
2016	France	Femme	36	2	50	60	59	23	75	34	50	41	3	artisan, commer&#231ant ou chef d'entreprise	2	81	concubinage	1	2	97	59	84	83		61	50	41	50	50	23	10	50	50	163	57	56	38	13	0	0	9
2017	France	Femme	33	2	75	78	47	77	71	67	82	50	50	profession interm&#233diaire	5	69	PACS&#233	1	2	50	50	50	75	17	90	85	24	55	98	17	50	11	78	160	58	58	0	-33	-67	-43	61	-73
2018	France	Femme	35	1	50	50	22	74	32	70	55	50	65	profession interm&#233diaire	4	78	PACS&#233	1	0	85	57	66	67							72				170	94	91	28
2019	France	Homme	43	2	70	100	13	87	75	28	70	50	84	artisan, commer&#231ant ou chef d'entreprise	4	90	mari&#233	1	2	50	50	53	54	70	21	50	50		17	50	15		71	175	92	95	0	35			0	49
2020	France	Femme	35	2	20	71	50	60	58	0	64	50	50	cadre et profession intellectuelle sup&#233rieure	6	77	c&#233libataire	2	0	97	87	96	99	10	23	91	50	34	37	1	4	18	53	164	69	68	10	-3	-35	-3	41	-13
2021	France	Femme	51	2	61	60	58	59	57	59	57	57	13		2	84	concubinage	1	3	63	50	50	46	39	37	82	60	50	50	18	19	10	27	153	56	56	13	-1	-17	0	22	2
2023	France	Femme	25	2	89	68	0	89	88	17	75	74	50	profession interm&#233diaire	4	68	concubinage	1	0	100	15	35	30	12	21	91	80	0	0	9	20	10	20	167	76	77	85	-11	-10	0	11	-9
2024	France	Femme	22	1	73	69	8	97	50	39	39	76	5	profession interm&#233diaire	4	97	concubinage	1	0	96	5	50	3	50	64	94	74	9	50	3	97	15	15	163	61	61	91	-94	0	-41	20	-14
2025	France	Femme	38		50	50	73	73	74	10	76	25	86	cadre et profession intellectuelle sup&#233rieure	6	79	concubinage	1	2	96	4	50	50	88	50	50	48	50	77	9	50	50	50	170	56	56	92	-41	0	-27	2	38
2026	France	Femme	33	1	67	78	12	99	65	75	69	31	20	ouvrier	2	78	mari&#233	1	1	99	71	100	85	35	69	99	22	50	67	0	1	50	50	165	73	75	28	-1	0	-17	77	-34
2027	France	Femme	22	1	3	1	2	0	0	100	2	98	1	profession interm&#233diaire	2	0	concubinage	1	0	55	56	59	57	50	50	50	50	50	50	50	25	0	0	163	62	62	-1	25	0	0	0	0
2028	France	Femme	37	2	75	67	20	83	79	3	26		50	profession interm&#233diaire	4	75	c&#233libataire	2	2	77	50	50	50	73	32	50	47	80	35	20	83	11	12	161	55	54	27	-63	-1	45	3	41
2029	France	Homme	31	2	28	28	0	0	50	34	25	72	50	profession interm&#233diaire	2	100	c&#233libataire	2	0	48	0	14	0	20	21	80	78	78	78	18	16	0	0	192	150	153	48	2	0	0	2	-1
2030	France	Femme	24	1	70	70	50	90	92	30	50	50	67	profession interm&#233diaire	4	99	c&#233libataire	2	0	50	23	50	50	8	34	88	50	28	68	14	43	0	26	169	70	72	27	-29	-26	-40	38	-26
2032	France	Femme	34	2	62	63	22	58	50	3	50	35	31	cadre et profession intellectuelle sup&#233rieure	6	78	c&#233libataire	2	0	88	43	62	64	50	65	82	39	50	50	3	61	13	13	160	47	47	45	-58	0	0	43	-15
2035	France	Femme	49	2	47	71	63	63	46	69	67	64	0	profession interm&#233diaire	4	68	c&#233libataire	2	0	91	62	80	59	44	62	51	39	45	58	36	55	22	57	162	70	68	29	-19	-35	-13	12	-18
2036	France	Femme	26	1										profession interm&#233diaire	4	75	concubinage	1	0	50	50	50	50	82	79	50	50	50	50	49	77	50	50	164	68	67	0	-28	0	0	0	3
2037	France	Femme	33	1	72	96	99	100	75	17	82	50	71	profession interm&#233diaire	2	73	PACS&#233	1	2	67	32	32	32	57	77	65	44	63	67	27	62	67	68	168	66	65	35	-35	-1	-4	21	-20
2038	France	Femme	50	1	84	83	100	91	100	100	91	91	87	cadre et profession intellectuelle sup&#233rieure	6	79	mari&#233	1	2	100	100	79	100							50				181	82	85	0
2039	France	Femme	61	2	84	73	22		36	50	26	26			2	94	mari&#233	1	2	85	87	85	77	40	50	69	76	50	54	12	15	50	50	159	77	77	-2	-3	0	-4	-7	-10
2040	France	Femme	29	2	76		75		66	24	33	54	28	profession interm&#233diaire	4	69	concubinage	1	0	86	100	100	100			98	100	0	0	17	10			170	65	65	-14	7		0	-2
2041	France	Femme	55	2	81	80	82		75	21	71			cadre et profession intellectuelle sup&#233rieure	2	71	c&#233libataire	2	1	80	76	84	75	77	75	36	24	100	93			20	80	168	85	85	4		-60	7	12	2
2043	France	Homme	47	2		75	75		76	26	76			cadre et profession intellectuelle sup&#233rieure	5	100	PACS&#233	1	1	50	21	81	81	50	81	50	1	50	80	50	50	50	82	175	85	87	29	0	-32	-30	49	-31
2044	France	Femme	47	2	80	88	52	87	50	11	65	29	50	&#224 la recherche d'un emploi	4	78	PACS&#233	1	0	92	23	50	50	58	70	77	48	50	76	50	50	50	72	165	82	85	69	0	-22	-26	29	-12
2047	France	Homme	20	1	61	68	0	100	60	100	62	46	70	&#233l&#232ve ou &#233tudiant	2	94	c&#233libataire	2	0	100	35	43	25	66	34	50	50	76	70	0	73	13	24	178	90	92	65	-73	-11	6	0	32
2048	France	Femme	37	2	100	98	98	98	97	5	100	20	50	ouvrier	4	71	PACS&#233	1	2	97	7	5	7	24	80	92	6	5	77	4		70	77	160	57	57	90		-7	-72	86	-56
2051	France	Femme	52	2	98	83	50	99	0	51	74	75	19	cadre et profession intellectuelle sup&#233rieure	5	73	c&#233libataire	2	0	84	50	50	50	71	14	70	72	20	3	2	12	10	29	174	65	61	34	-10	-19	17	-2	57
2053	France	Femme	30	2	50	50	0	0	0	0	0	0	0	cadre et profession intellectuelle sup&#233rieure	6	99	PACS&#233	1	2	50	50	50	50	50	50	50	50	50	50	50	50	1	0	178	69	69	0	0	1	0	0	0
2054	France	Femme	29	2	76	71	62	37	66	16	77	19	50	cadre et profession intellectuelle sup&#233rieure	5	63	concubinage	1	0	64	55	57		50	69	50	40	63	81	29	58	65	72	168	49	48	9	-29	-7	-18	10	-19
2056	France	Femme	44	2	72	70	10	9	15	88	39	65	7	ouvrier	4	100	concubinage	1	2	100	53	50	50	30	41	82	70	13	21	20	27	58	69	176			47	-7	-11	-8	12	-11
2058	France	Homme	43	2	21	20	15	100	71	61	67	77	78	cadre et profession intellectuelle sup&#233rieure	4	76	concubinage	1	2	79	19	15	20	59	92	76	34	65	88	26	9	48	53	171	88	92	60	17	-5	-23	42	-33
2060	France	Femme	35	2	62	62	33	60	22	21	64	35	17	profession interm&#233diaire	4	100	mari&#233	1	2	100	100	100	97	71	60	62	74	85	9	1	50	66	19	152	54	56	0	-49	47	76	-12	11
2061	France	Femme	63	2	72	70	50	1	1	21	37	50	5	retrait&#233	4	50	mari&#233	1	1	72	50	50	50	25	33	64	50	13	12	13	21	50	23	160	58	58	22	-8	27	1	14	-8
2062	France	Femme	27	1	50	49	50	75	85	87	67	40	75	profession interm&#233diaire	4	78	PACS&#233	1	0	85	38	18	36	16	18	75	59	100	34	0	55	33	33	172	60	60	47	-55	0	66	16	-2
2064	France	Femme	29	2	75	80	81	100	77	71	70	78	0	ouvrier	4	100	PACS&#233	1	2	69	21	22	68	48	85	62	26	23	89	12	78	69	74	166	55	55	48	-66	-5	-66	36	-37
2065	France	Femme	25	2	17	18	96	22	23	100	13	52	19	profession interm&#233diaire	4	44	c&#233libataire	2	0	100	50	50	100	50	50	45	43	50	50	0	100	100	100	153	54	53	50	-100	0	0	2	0
2066	France	Femme	37	2	50	78	78	75	97	96	73	50	97	ouvrier	2	99	concubinage	1	1	50	4	3	50	50	96	97	50	95	50	4	97	50	94	166	52	50	46	-93	-44	45	47	-46
2067	France	Femme	22	1	62	50	17	52	23	87	50	50	13	&#233l&#232ve ou &#233tudiant	5	75	c&#233libataire	2	0	87	85	84	84	37	62	84	42	68	29	11	36	5	15	168	53	53	2	-25	-10	39	42	-25
2068	France	Femme	67	2	83	71	51	73	23	12	19	29	24	profession interm&#233diaire	2	100	mari&#233	1	2	85	28	54	58	34	100	59	4	14	64	1	15	26	96	165	70	69	57	-14	-70	-50	55	-66
2069	France	Homme	46	2	80	79	26			81	76	50	3	artisan, commer&#231ant ou chef d'entreprise	2		concubinage	1	0	85	82	81	76	25	80					23	84	14		175	90	88	3	-61				-55
2071	France	Femme	38	2	67	50	82	20	81	85	50	50	14	profession interm&#233diaire	2	44	mari&#233	1	2	53	0	80	18	50	83	98	28	50	88	50	100	50	75	164	67	67	53	-50	-25	-38	70	-33
2072	France	Femme	35	2	74	80	72			27		50	76	profession interm&#233diaire	4	75	concubinage	1	2	80	88	82	100	75	64	34	53	68	50	38	22	50	50	162	50	51	-8	16	0	18	-19	11
2075	France	Femme	41	2	97	100	83	97	100	4	92	8	1	cadre et profession intellectuelle sup&#233rieure	6	98	PACS&#233	1	3	100	64			73		22	32	96		4		48	18	174	47	48	36		30		-10
2076	France	Femme	27	2	13	87	96	95	85	20	35	80	1	profession interm&#233diaire	2	100	mari&#233	1	2	100	100	95	99	0	40	79	35	0	0	25	0	0	0	174	109	109	0	25	0	0	44	-40
2077	France	Homme	55	1	66	69	64	71	65	63	40	50	50	profession interm&#233diaire	1	29	mari&#233	1	2	66	50	50	50	50	60	50	30	50	50	34	40	50	50	172	72	74	16	-6	0	0	20	-10
2079	France	Homme	63	2	66	85	36		30	76	34	77		retrait&#233	5	77	mari&#233	1	1	70	73	74	50	50	87	50	50	50	50	7	50	50	50	180	84	85	-3	-43	0	0	0	-37
2080	France	Femme	36	2	98	98	68	97	100	35	95	62	29	cadre et profession intellectuelle sup&#233rieure	5	74	c&#233libataire	2	2	93	94	94	92	50	50	83	33	72	61	10	65	50	83				-1	-55	-33	11	50	0
2081	France	Femme	39	2	63	65	2	90	10	67	75	35	50	ouvrier	2	97	c&#233libataire	2		50	50	50	50									50	50	167	53	53	0		0
2082	France	Femme	32	2	50	28	0	100	0	100	50	38	100	profession interm&#233diaire	5	100	c&#233libataire	2	0	100	0	0	0	21	100	83	22	50	50	0	100	50	50	168	73	78	100	-100	0	0	61	-79
2085	France	Homme	60	2	50	78	16	50	100	100	50	38	11	cadre et profession intellectuelle sup&#233rieure	5	67	autre		2	97	37	37	38	41	41	92	50	10	12	4	69	29	50	179	79	81	60	-65	-21	-2	42	0
2088	France	Femme	32	2	70	73	63	100	0	60	56	51	41	profession interm&#233diaire	2	95	mari&#233	1	2	72	100	100	95	82	22	54	71	72	12	4	3	37	63	176	77	77	-28	1	-26	60	-17	60
2092	France	Homme	58	2	75	75	26		67	22				profession interm&#233diaire	4	86	mari&#233	1	5	72	21	26	23	21	46	73		25	38	24	68	23	69	185	110	110	51	-44	-46	-13		-25
2093	France	Femme	49	2	82	63	31	34	33	45		68	0	artisan, commer&#231ant ou chef d'entreprise	4	87	concubinage	1	1	74	72	71	69	67	100	73	25	10	8	5	4		68	175	59	59	2	1		2	48	-33
2095	France	Femme	45	2	72	74	96		26	74	76	50			4	100	PACS&#233	1	3	50	24	50	50	50	0	50	74	50	50	50	50	50	50	175	100	100	26	0	0	0	-24	50
2096	France	Femme	34	2	26	28	71	76	80	26	26	73	63	cadre et profession intellectuelle sup&#233rieure	5	80	concubinage	1	0	87	75	100	100	50	50	50	50	50	72	31	0	0	0	168	64	64	12	31	0	-22	0	0
2098	France	Femme	25	1	48	100	50	100	100	27	100	34	19	profession interm&#233diaire	4	10	c&#233libataire	2		100	29	7	7	12	63	87	23	76	78	12	87	1	7	168	60	60	71	-75	-6	-2	64	-51
2099	France	Femme	52	2	98	99	91		100	0	100	93	92	profession interm&#233diaire	4	98	mari&#233	1	3	90	16	96	97	31	80	82	19	50	72	23	77	14	80	165	88	91	74	-54	-66	-22	63	-49
2101	France	Homme	30	2	26	67	69	79	50	28	50	50	29	cadre et profession intellectuelle sup&#233rieure	5	94	PACS&#233	1	0	50	100	100	100	50	66	32	29	50	50	27	1	0	0	190	88	88	-50	26	0	0	3	-16
2102	France	Femme	29	1	76	77	82	87	81	100	77	92	100	ouvrier	2	90	PACS&#233	1	1	100	93	83	88	75	93	40	67	13	36	4	23	71	74	164	58	58	7	-19	-3	-23	-27	-18
2103	France	Homme	50	2	100	86	17	100	69	25	82	35	11	cadre et profession intellectuelle sup&#233rieure	5	50	PACS&#233	1	1	94	17	26	26	50	79	91	72	20	70	10	68	18	90	192	95	95	77	-58	-72	-50	19	-29
2105	France	Femme	45	2	74	77	81	78	100	0	74			ouvrier	4	100	mari&#233	1	2	100	0	0	0	30	65	50	50	48	100	0	76	50	50	165	57	57	100	-76	0	-52	0	-35
2108	France	Femme	33	2	77	78	62	76			75	37		profession interm&#233diaire	4	79	mari&#233	1	1	76	49	61	42	74	67	50	43	51	50	50	36	50	68	158	64		27	14	-18	1	7	7
2109	France	Femme	32	2	64	50	81	83	97	30	50	29	72	profession interm&#233diaire	4	61	mari&#233	1	3	100	79	98	100	44	76	75	25	76	50	18	50	50	50	165	55	55	21	-32	0	26	50	-32
2110	France	Femme	40	2	86	88	90	50	71	63	80	26		ouvrier	2	70	PACS&#233	1	2	20	84	91	86	26	50	82	50	28	50	35	32	44	63	160	75	77	-64	3	-19	-22	32	-24
2113	France	Femme	61	2	73	53	37	88	6	29	80	33		retrait&#233	4	91	mari&#233	1	3	79	35	41	65	50	50	50	50	66	36	28	71	26	80	167	55	55	44	-43	-54	30	0	0
2115	France	Femme	38	2	81	80	85	53	71	20	64	23	3	ouvrier	2	100	PACS&#233	1	3	80	50	50	50		77	50	35			15	81	16	80	161	62	62	30	-66	-64		15
2116	France	Homme	42	2	100	78	1	100	32	50	65	36	0	profession interm&#233diaire	4	0	c&#233libataire	2	0	82	41	41	41	69	91	70	34	58	47	3	28	0	25	168	76	74	41	-25	-25	11	36	-22
2117	France	Femme	48	1	50	50	50	50	50	50	50	50	50	profession interm&#233diaire	4	77	PACS&#233	1	0	94	22	20	28	50	64	73	27	50	66	22	67	50	50	162	72	72	72	-45	0	-16	46	-14
2118	France	Homme	42	2	38	59	36	69	52	65	62	50	50	cadre et profession intellectuelle sup&#233rieure	4	79	c&#233libataire	2	2	60	50	50	49	50	50	50	50	50	50	50	49	50	50	184	95	101	10	1	0	0	0	0
2121	France	Femme	40	2	81	64	100	50	63	0	83	66	50	profession interm&#233diaire	5	94	PACS&#233	1	2	81	24	18	50	75	65	30	5	77	67	2	78	50	50	150	65	68	57	-76	0	10	25	10
2122	France	Femme	45	2	84	88	83	14	84	81	91	84	6	profession interm&#233diaire	2	96	c&#233libataire	2	3	85	11	6	13	42	75	78		49	65	32	83	16	91	174	84	82	74	-51	-75	-16		-33
2123	France	Femme	54	2	84	72	88	100	30	63	87	65	67	artisan, commer&#231ant ou chef d'entreprise	5	100	mari&#233	1	0	100	84	65	80	7	70	84	39	32	63	4	12	100	100	161	65	65	16	-8	0	-31	45	-63
2124	France	Femme	57	1	88	81	81	82	83	100	80	50	50	profession interm&#233diaire	2	86	mari&#233	1	1	82	16	50	50	19	78	50		50	50	4	80	50	78	159	80	80	66	-76	-28	0		-59
2129	France	Femme	30	2	98	100		100		100	100			cadre et profession intellectuelle sup&#233rieure	4	100	concubinage	1	0	100	99	100	100							0	0		96	172	100	100	1	0
2130	France	Homme	39	2	80	82	91	98	12	10		0	11	cadre et profession intellectuelle sup&#233rieure	6	94	mari&#233	1	5	50	86	95					64			20	26	50		184	85	87	-36	-6
2131	France	Femme	39	2	91	85	100	38	71	30	81	25	28	profession interm&#233diaire	5	88	PACS&#233	1	2	81	79	24	71		72				70				87	160	114	112	2
2132	France	Femme	34	2		50								artisan, commer&#231ant ou chef d'entreprise	4	72	PACS&#233	1	2	97	97	99	98							4	2			165	60	61	0	2
2133	France	Homme	48	2	50	50	50	50	50	50	17	78	6	ouvrier	4	81	autre		5	72	30	60	63	28	30	25	25	24	50	14	23	6	7	175	80	80	42	-9	-1	-26	0	-2
2134	France	Femme	30	2	50	50	60	10	63	50	50	92	32	profession interm&#233diaire	2	50	c&#233libataire	2	3	60	40	40	39	24	40	75	65	11	20	5	19	66	66	156	48	48	20	-14	0	-9	10	-16
2135	France	Homme	44	2	80	83	50	84	50	98	89	23	13	profession interm&#233diaire	4	84	c&#233libataire	2	0	50	50	50	50	50	50	50	18	50	50	25	95	50	97	188	84	84	0	-70	-47	0	32	0
2136	France	Femme	36	2	87	64	62	84	88	28	73	75	6	profession interm&#233diaire	4	98	c&#233libataire	2	0	80	20	27	26	26	38	18	15	15	15	18	88	34	57	178	62	62	60	-70	-23	0	3	-12
2139	France	Homme	33	2	8	11	100	13	100	89	10	78	10	agriculteur, exploitant	4	75	c&#233libataire	2	0	88	73	79	74	19	19	84	84	72	77	12	29			164	62	62	15	-17		-5	0	0
2140	France	Femme	38	1	75	66	14	82	84	20	73	20	80	profession interm&#233diaire	5	63	PACS&#233	1	3	96	97	98	98	29	71	83	56	75	87	0	4	29	46	173	75	77	-1	-4	-17	-12	27	-42
2143	France	Femme	48	2	69	61	38	38	50	35	39	63	50	profession interm&#233diaire	5	85	mari&#233	1	0	91	79	83	85		54	59	30					54	72	160	70	68	12		-18		29
2144	France	Femme	54	2	74	50	21	0	0	79	50	50	0	ouvrier	2	72	mari&#233	1	1	22	80	50	50	24	39	76	79	13	8	12	22	39	50	165	55	55	-58	-10	-11	5	-3	-15
2146	France	Femme	35	1	50	35	38	90	77	69	50	85	100	profession interm&#233diaire	2	80	PACS&#233	1	0	95	13	38	34	0	33	84	64	7	31	4	100	22	19	163	53	53	82	-96	3	-24	20	-33
2148	France	Homme	19	1	50	50	50	50	50	50	50	20	50	profession interm&#233diaire	2	70	c&#233libataire	2	0	92	19	15	15	70	78	50	50	58	23	11	84	90	88	180	84	89	73	-73	2	35	0	-8
2150	France	Homme	28	1	34	20	0	25	15	31	5	72	15	&#233l&#232ve ou &#233tudiant	6	99	c&#233libataire	2	0	50	50	50	50	50	50	50		50	50	28	70	50	50	184	78	78	0	-42	0	0		0
2151	France	Femme	53		70	71	12	57	0	64	65	50		&#224 la recherche d'un emploi	2	81	mari&#233	1	2	82	76	80	82	50	50	53	50	50	50	9	27	50	50	162	79	79	6	-18	0	0	3	0
2152	France	Femme	53	2	7	70	11	80	7	16	18	89	7	artisan, commer&#231ant ou chef d'entreprise	4	99	mari&#233	1	5	91	96	96	98	9	15	98	99	31	50	100	7	3	0	167	81	82	-5	93	3	-19	-1	-6
2153	France	Femme	42	2	65	76	24	38	16	84	27	78	4	profession interm&#233diaire	4	73	c&#233libataire	2	0	65	37	35	38	35	72	70	39	30	30	23	47	2	15	178	89	86	28	-24	-13	0	31	-37
2155	France	Femme	38	2	54	84	66	0	86	82	74	38	0	profession interm&#233diaire	5	64	PACS&#233	1	1	88	74	58	75	24	56	85	50	50	50	18	15	50	50	171	74	75	14	3	0	0	35	-32
2156	France	Femme	36	2	4	68	14	17	13	12	14	13	16	&#224 la recherche d'un emploi	5	84	PACS&#233	1	2	78	93	82	84	4	12	83	87	25	37	3	0	2	0	175	61	62	-15	3	2	-12	-4	-8
2157	France	Femme	35	2	85	100	65	100	83	17	81	50		profession interm&#233diaire	4	78	mari&#233	1	2	92	80	73	18	50	83	71	50	17	50	0	10	18	66	165	110	110	12	-10	-48	-33	21	-33
2158	France	Femme	25	2	0	0	100	0	0	0	65	97	6	&#224 la recherche d'un emploi	4	100	concubinage	1	0	100	2	0	0	19	95	93	5	17	9	16	93	0	5	157	93	93	98	-77	-5	8	88	-76
2159	France	Femme	25	2	35	36	37	58	40	56	5	55	5	profession interm&#233diaire	2	59	c&#233libataire	2	0	66	27	32	61	30	59	79	66	35	52	27	52	33	56	160	68	68	39	-25	-23	-17	13	-29
2160	France	Femme	40	2	77	80	50		36	81	71	50	0	profession interm&#233diaire	4	75	mari&#233	1	0	78	80	81	89				28			21	21		69	160	65	64	-2	0
2163	France	Homme	44	1	50	50	50	50	50	50	50	50	50	cadre et profession intellectuelle sup&#233rieure	6	100	mari&#233	1	3	98	72	71	73	50	50	50	50	50	50	0	34	50	50	182	80		26	-34	0	0	0	0
2165	France	Homme	30	2	10	14	69	15	12	76	6	33		&#224 la recherche d'un emploi	4	93	PACS&#233	1	1	68	15	21	19	16	34	81	67	98	28	50	82	28	33	185	68	68	53	-32	-5	70	14	-18
2167	France	Femme	37	2	74	79	32	75	52	25	65	50	30	artisan, commer&#231ant ou chef d'entreprise	2	80	mari&#233	1	0	76	37	67	38	32	59	74	41	33	48	29	66	35	65	169	84	87	39	-37	-30	-15	33	-27
2168	France	Femme	40	2	77	50	27	68	68	36	50	82	66	cadre et profession intellectuelle sup&#233rieure	6	75	c&#233libataire	2	0	87	89	86	87	33	50	50	50	36	36	11	12	16	73	163	46	47	-2	-1	-57	0	0	-17
2169	France	Femme	42	2	97	93	66	81	89	3	82	34	86	artisan, commer&#231ant ou chef d'entreprise	4	93	PACS&#233	1	2	94	98	97	93	54	59	50	39	60	41	6	25	24	73	170	79	78	-4	-19	-49	19	11	-5
2171	France	Femme	37	2	100	85	87	88	49	26	87	0	50		2	100	PACS&#233	1	2	82	76	60	85	50	66	88	20	69	70	50	74	81	94	161	86		6	-24	-13	-1	68	-16
2172	France	Femme	29	2	84	77	77	0	0	0	80	27	50	ouvrier	2	100	c&#233libataire	2	2	100	0	1	0	0	100	100	0	0	50	0	100	0	19	160	76	76	100	-100	-19	-50	100	-100
2173	France	Femme	30	2	14	9	50	50	75	33	50	41	3	cadre et profession intellectuelle sup&#233rieure	6	82	PACS&#233	1	2	100	80	100	79	34	60	62	62	50	36	1	3	0	2	170	66	65	20	-2	-2	14	0	-26
2174	France	Homme	22	2	16	0	62	66	97	19	6	9	48	&#233l&#232ve ou &#233tudiant	4	99	c&#233libataire	2	0	98	63	67	66	28	80	83	13	30	73	5	39	27	51	175	60	59	35	-34	-24	-43	70	-52
2175	France	Homme	35	2	0	0	77	100	82	69	71	0	50	cadre et profession intellectuelle sup&#233rieure	5	100	c&#233libataire	2	0	73	32	32	31	50	50	50	22	50	50	17	35	0	0	178	60	65	41	-18	0	0	28	0
2176	France	Homme	59	1	100	97	99	100	83	9	84	26	88	ouvrier	2	0	mari&#233	1	4	70	1	25	29		84		27		77	2	81	49	88	177	74	74	69	-79	-39
2177	France	Femme	42	2	70	74	77	76	50	50	71	50	50	profession interm&#233diaire	4	67	c&#233libataire	2	2	70	100	100	100	50	50	52	28	50	50	23	20	65	63	163	62	62	-30	3	2	0	24	0
2178	France	Femme	38	2	100	63	100	50	66	12	83	50	50	&#224 la recherche d'un emploi	4	100	concubinage	1	1	100	0	0	0	49	75	66	0	61	63	67	100	62	96	170	120	115	100	-33	-34	-2	66	-26
2179	France	Femme	30	2	73	82	80	52	79	83	78	77	0	profession interm&#233diaire	4	97	PACS&#233	1	3	100	18	20	23	26	66	66	19	50	50	70	98	30	100	148	49	50	82	-28	-70	0	47	-40
2180	France	Femme	43	2	100	86	67	100	64	50	67	60	69	cadre et profession intellectuelle sup&#233rieure	5	37	mari&#233	1	1	87	50	100	54	34	53	70	50	49	79	31	4	50	57	165		70	37	27	-7	-30	20	-19
2181	France	Femme	48	2	77	97	85	99	100	18	80	19	77	ouvrier	4					90	75	74	74		86		21		32	14	12		100	158	66	68	15	2
2182	France	Femme	40	1	94	94		86	87	9	83	82		profession interm&#233diaire	4	93	mari&#233	1	3	93	15	15	11	50	94		8	90	88	6	92	5	63	166	62	64	78	-86	-58	2		-44
2184	France	Homme	32	2	68	26	0	76	0	1	30	28	34	cadre et profession intellectuelle sup&#233rieure	5	27	concubinage	1	1	75	100	100	94	71	69	50		50		64	28			173	88	88	-25	36				2
2185	France	Femme	42	2	87	86	19	15	13	26	73	78	7	profession interm&#233diaire	4	59	mari&#233	1	0	85	88	77	82	12	71	85	53	19	20	13	17	6	77	169	82	82	-3	-4	-71	-1	32	-59
2186	France	Homme	23	2	27	20	20	0	78	16	13	25	84	&#233l&#232ve ou &#233tudiant	5	100	c&#233libataire	2	0	19	100	100	76	0	69	81	17	0	19	0	0	13	13	175	85	92	-81	0	0	-19	64	-69
2187	France	Femme	30	2	100	97	100	100	100	0	100	98	97	&#224 la recherche d'un emploi	2	99	concubinage	1	2	100	5	5	0	2	100	98	2	99	1	5	100	2	100	150	111	111	95	-95	-98	98	96	-98
2188	France	Homme	20	1	55	10	87	10	9	10	13	70	5	profession interm&#233diaire	2	88	c&#233libataire	2	0	100	0	0	0	0	93	100	52	100	13	0	100	0	0	175	62	60	100	-100	0	87	48	-93
2189	France	Femme	23	1	29	76	24	100	75	50	73	83	50	profession interm&#233diaire	4	50	c&#233libataire	2	0	100	0	0	0	0	65	100	40	36	50	0	100	0	11	168	95	95	100	-100	-11	-14	60	-65
2191	France	Femme	34	2	84	72	53	5	27	23	86	23	3	profession interm&#233diaire	4	93	PACS&#233	1	1	74	38	38	41	29	70	80	29	80	78	17	75	32	76	160	86	89	36	-58	-44	2	51	-41
2192	France	Femme	41	2	91	67	68	2	4	74	73	72	0	profession interm&#233diaire	4	100	mari&#233	1	3	81	96	87	80	50	50	74	50	52	50	10	62	50	78	170	70	68	-15	-52	-28	2	24	0
2193	France	Femme	43	2	87		86			50	85	83		ouvrier	4	97	c&#233libataire	2	1	91	38	48	50	64	84	50	50	79	99	2	50	5	7	170	69	70	53	-48	-2	-20	0	-20
2194	France	Femme	21	2	66	67	0	0	90	16	0	41	0	ouvrier	4	79	c&#233libataire	2	0	90	0	0	0	14	16	87	56	10	11	10	89	0	23	175	125	120	90	-79	-23	-1	31	-2
2195	France	Femme	50	2		6	0	0	0	100	0	92	100	profession interm&#233diaire	4	100	concubinage	1	1	100	100	100	100	0	100	100	0	0	0	0	0	0		165	50	50	0	0		0	100	-100
2196	France	Femme	39	2	71	67	53	57	62	60	49	78	0	&#233l&#232ve ou &#233tudiant	5	50	mari&#233	1	2	100	85	85	88	50	50	50	50	50	50	50	50	17	60	155	54	54	15	0	-43	0	0	0
2197	France	Femme	44	1	100	87	84	100	79	19	79	83	87	profession interm&#233diaire	4	80	mari&#233	1	2	75	63	57	65	13	72	72	38	50	60	23	25	30	85	166	71	68	12	-2	-55	-10	34	-59
2198	France	Femme	51	1	100	100	100	100	100	0	100	20	100	profession interm&#233diaire	4	100	veuf	3	2	49	12	75	12	12	80	80	12	14	89	50	51	50	80	160	84		37	-1	-30	-75	68	-68
2199	France	Femme	58	2	100	50	23	13	13	17	23	95	4	artisan, commer&#231ant ou chef d'entreprise	1	93	mari&#233	1	2	91	29	78	79	10	4	75	85	7	5	91	5	6	83	164	86	86	62	86	-77	2	-10	6
2200	France	Homme	38	1	69	58	19		70	33				cadre et profession intellectuelle sup&#233rieure	5	81	c&#233libataire	2	0	77	21	79	77							27	68			185	95		56	-41
2201	France	Femme	34	1	64	64	0	98	79	18	50	50	50	profession interm&#233diaire	2	50	PACS&#233	1	3	96	71	76	73	50	72	76	9	50	69	3	50	50	50	161	48	48	25	-47	0	-19	67	-22
2202	France	Femme	25	1	21	16	0	35	0	100	12	44	0	profession interm&#233diaire	4	0	c&#233libataire	2	0	95	4	2	3	39	66	100	48	41	57	2	83	0	0	166	54	54	91	-81	0	-16	52	-27
2204	France	Homme	48	2	90	100	100	100	100	0	67	100	100	profession interm&#233diaire	4	100	c&#233libataire	2	0	100	27	30	29	13	100	82	15	14	89	0	0	36	64	172	110	107	73	0	-28	-75	67	-87
2205	France	Femme	46	2	100	100	50		50	50	100	50		&#224 la recherche d'un emploi	2	25	mari&#233	1	4	100	73	75	76	50	50	50	50	70	50	13	17	50	100	168	85	85	27	-4	-50	20	0	0
2208	France	Femme	30	2	73	100	90	100	35	63	99	24		profession interm&#233diaire	2	90	PACS&#233	1	1	82	82	31	76	29	68	41	16	30	31	21	76	38	72	153	65	65	0	-55	-34	-1	25	-39
2209	France	Femme	48	2	60	58				58	59	50		profession interm&#233diaire	2	67	mari&#233	1	1	77	60	59	59	55	45			56	42	20	37	69	67	158	72	72	17	-17	2	14		10
2210	France	Femme	34	2	91	100	82	0	90	28	89	26	50	cadre et profession intellectuelle sup&#233rieure	5	88	mari&#233	1	3	89	40	37	18	50	86	74	31	71	99	23	2	12	89	160	93	92	49	21	-77	-28	43	-36
2211	France	Femme	40	2	8	9	76	75	14	14	85	12	34	cadre et profession intellectuelle sup&#233rieure	6	94	c&#233libataire	2	0	100	0	0	0	28	87	50	20	0	26	14	79	16	15	169	73	73	100	-65	1	-26	30	-59
2213	France	Femme	35	1	66	64	56	69	36	73	63	63		profession interm&#233diaire	4		mari&#233	1	2	86	71	75	76	58	75	73	83	62	61	16	18		73	156	65	65	15	-2		1	-10	-17
2214	France	Femme	55	2	67	95	73	100	84	98	80	70	68	profession interm&#233diaire	4	77	mari&#233	1	2	82	66	64	67	29	50	66	38	13	18	11	12	24	50	167	95	95	16	-1	-26	-5	28	-21
2216	France	Femme	43	1	50	74	73	75	79	26	50	50	34	profession interm&#233diaire	4	65	concubinage	1	3	97	99	97	97	50	50	65	62	50	57	5	7	9	10	165	58	58	-2	-2	-1	-7	3	0
2219	France	Femme	25	1	70	87	82	100	99	65	66	62	65		2	100	concubinage	1	0	100	79	82	87	80	100		25	69	72	0	60			165	75	75	21	-60		-3		-20
2220	France	Femme	19	2	0	19	0	50	100	0	0	50	50	&#233l&#232ve ou &#233tudiant	2	50	c&#233libataire	2	0	100	0	31	62	100	100	0	0	0	0	0	100	10	3	157	50	50	100	-100	7	0	0	0
2223	France	Femme	28		64	64	79	63	33	31	58	70	1	profession interm&#233diaire	2	72	concubinage	1	0	100	19	26	23	14	50	96	50	26	62	12	76	9	59	164	54	59	81	-64	-50	-36	46	-36
2224	France	Femme	49			77	60	86	73	24	62		68	profession interm&#233diaire	4	38	mari&#233	1	1	100	37	74	76	66	89	50	42	39	60	13	39	24	57	178	56	56	63	-26	-33	-21	8	-23
2225	France	Femme	40	1	24	21	23	50	77	27	29		75	profession interm&#233diaire	2	80	mari&#233	1	2	50	11	19	15		77	95	67			9	14			172	104	100	39	-5			28
2226	France	Femme	47	1	67	31	31	55	0	0	50	26	27	ouvrier	2	27	mari&#233	1	3	81	50	48	71	9	33	100	85	1	9	0	13	0	0	169	69	69	31	-13	0	-8	15	-24
2227	France	Femme	40	2	100	100	100	0	0	100	100	68	50	&#224 la recherche d'un emploi	2	52	c&#233libataire	2	6	100	0	0	0	100	100	70	0	72	0	35	100			160	66	68	100	-65		72	70	0
2228	France	Femme	57	2	71	58	23	36	21	50	26	74	1	profession interm&#233diaire	2	77	mari&#233	1		50	50	50	50	24	41	76	76	19	20	32	15	7	10	155	70	70	0	17	-3	-1	0	-17
2229	France	Femme	27	1	71	83	42	87	85	84	82	60	79	profession interm&#233diaire	4	22	concubinage	1	0	83	60	79	81	64	73	54	50	40	38	17	27	68	81	161	54	55	23	-10	-13	2	4	-9
2230	France	Femme	52	2	74	57	20	100	50	50	61	33	50	profession interm&#233diaire	4	75	c&#233libataire	2	3	50	50	50	50	92	100	84	19	50	50	13	60	13	22	170	55	53	0	-47	-9	0	65	-8
2232	France	Femme	23	2	31	65	0	100	72	3	20	71	71	profession interm&#233diaire	4		c&#233libataire	2	0	67	54	25	56	66	80	23	23	83	85	14	89	50	50	176	98	97	13	-75	0	-2	0	-14
2233	France	Femme	48	2	14	60	5	10	7	50	11	87	12	artisan, commer&#231ant ou chef d'entreprise	5	91	c&#233libataire	2	0	46	45	36	71	38	35	50	50	22	19	30	79	20	20	172	113	115	1	-49	0	3	0	3
2234	France	Femme	46	2	63	60	28	100	73	18	42	37	81	ouvrier	2	82	c&#233libataire	2	2	83	13	17	17	20	29	81	70	28	41	23	74			160	74	72	70	-51		-13	11	-9
2235	France	Femme	47	2	66	72	23	97	72	77	61	30	62	profession interm&#233diaire	2	90	concubinage	1	2	100	29	61	59	33	98	66	39	60	80	24	73	32	62	155	77	77	71	-49	-30	-20	27	-65
2236	France	Femme	30	1	50	73	21	98	77	34	50	59	84	profession interm&#233diaire	4	72	c&#233libataire	2	0	50	50	27	43	50	65	88	65	75	75	28	31	20	18	169	58	58	0	-3	2	0	23	-15
2237	France	Homme	30	1	82	84	16	86	66	18	54	52	68	profession interm&#233diaire	5	84	PACS&#233	1	0	74	24	27	29	24	73	71	74	17	50	34	73	10	15	188	94	96	50	-39	-5	-33	-3	-49
2238	France	Femme	36	1	16	14	0	34	67	50	50	50	33	profession interm&#233diaire	4	87	PACS&#233	1	2	80	80	84	89	25	26	79	75	50	50	12	0	0	0	167	56	57	0	12	0	0	4	-1
2240	France	Homme	17	2	94	95	98		94	98	96	92	98	&#224 la recherche d'un emploi	1	96	c&#233libataire	2	0	96	0	0	0	20	98	100	1	72	99	0	96	0	96	176	64	67	96	-96	-96	-27	99	-78
2241	France	Homme	28	2										cadre et profession intellectuelle sup&#233rieure	5		c&#233libataire	2	0	100	23	25	21											188	110	113	77
2242	France	Femme	27	1	17	62	9	75	82	79	26	92	8	profession interm&#233diaire	4	96	concubinage	1	0	96	80	97	97	0	2	97	97	6	5	5	66	4	3	169	66	69	16	-61	1	1	0	-2
2243	France	Femme	34	1	13	33	11	9	13	12	12	84	2	profession interm&#233diaire	4	91	mari&#233	1	1	97	82	86	86	14	57	88	72	8	35	4	4	9	7	163	49	49	15	0	2	-27	16	-43
2244	France	Femme	41	1	100	100	100	100	100	100	100	0	99	profession interm&#233diaire	4	75	mari&#233	1	3	100	88	46	14	25	90	51	11	26	83	23	2	67	97	162	74	74	12	21	-30	-57	40	-65
2245	France	Femme	29	1	0	50	50	100	100	0	0	0	100	profession interm&#233diaire	4	100	c&#233libataire	2	0	50	0	0	0	50	100	27	0	50	50	21	100	50	50	152	50	52	50	-79	0	0	27	-50
2246	France	Femme	42	2	100	100	100		24	27	51	34		ouvrier	2	100	mari&#233	1	2	100	100	100	100	21	100	100	1	73	20	0	45	80	100	172	64	62	0	-45	-20	53	99	-79
2247	France	Femme	49	2	50	67	31	50	0	100	18	74	0	artisan, commer&#231ant ou chef d'entreprise	4	87	c&#233libataire	2	0	82	26	50	45	6	28	90	80	50	50	2	16	23	25	168	63	63	56	-14	-2	0	10	-22
2248	France	Femme	40	2	26	75	16		28	24	62	74	68	ouvrier	4	100	mari&#233	1	2	99	74	81	81							0	3	17	75	156	42	42	25	-3	-58
2249	France	Femme	42	1	76	75	82	98	98	99	98	99	100	ouvrier	4	99	autre		2	100	100	100	100	78	79	26	20	74	98	1	2	50	84	163	70	70	0	-1	-34	-24	6	-1
2251	France	Femme	49	2	93	95	29	50	89	96	88	26	20	profession interm&#233diaire	4	85	PACS&#233	1	1	67	14	15	18	17	85	86	17	14	100	5	100	83	85	162	77	77	53	-95	-2	-86	69	-68
2254	France	Femme	63	1	100	100	100	100	66	29	96	85	50	profession interm&#233diaire	2	66	c&#233libataire	2	0	100	54	100	100	7	81	100	21	50	50	12	1	27	86	160	65	63	46	11	-59	0	79	-74
2255	France	Femme	40	1	82	50	50	73	75	68	68	53	74	profession interm&#233diaire	4	68	mari&#233	1	2	85	41	50	50	55	67	73	50	36	46	38	38	9	31	150	70	70	44	0	-22	-10	23	-12
2257	France	Femme	47	1	63	100	100	100	77	0	81	19	89	profession interm&#233diaire	4	50	mari&#233	1	3	100	50	74	75	69	100	78	3	50	50	50	79	3	92	167	95		50	-29	-89	0	75	-31
2258	France	Femme	17	2	77	100	100	79	100	25	97	2	9	&#233l&#232ve ou &#233tudiant	1	93	c&#233libataire	2	0	89	0	0	0	70	100	92	0	2	86	6	100	68	69	165	62	60	89	-94	-1	-84	92	-30
2260	France	Homme	43	1	81	100	100	100	69	38	73	21	76	cadre et profession intellectuelle sup&#233rieure	6	26	mari&#233	1	3	100	73	75	75	50	50	50	50	58	80	22	100	50	71	170	140	142	27	-78	-21	-22	0	0
2262	France	Femme	33	2	31	50	75	73	98	98	21	38	17	ouvrier	2	96	c&#233libataire	2	2	83	53	19	24	20	46	88	64	2	82	50	2	50	50	171	57	57	30	48	0	-80	24	-26
2263	France	Femme	33	2	69	68	34	81	50	66	81	14	83	cadre et profession intellectuelle sup&#233rieure	5	100	PACS&#233	1	0	100	84	100	80									2	10	177	133	120	16		-8
2264	France	Femme	49	1	99	98	50	98	3	50	97	50	97	profession interm&#233diaire	2	74	mari&#233	1	2	99	77	77	74	10	96	99	50	50	50	1	5	100	100	153	74	74	22	-4	0	0	49	-86
2265	France	Femme	77	2	74	50	27	50	70	25	50	50	24	retrait&#233	2	87	autre		1	70	72	76	75	50	50	50	50	50	50	19	19	17	50	165	103	103	-2	0	-33	0	0	0
2268	France	Femme	43	2	77	80	50		70	50	72	73		agriculteur, exploitant	2	98	mari&#233	1	0	50	50	50	50	50	59	50	42	50	50	5	85	50	50	168	56	56	0	-80	0	0	8	-9
2269	France	Femme	48	2	81	59	27	24	0	59	65	39	20	cadre et profession intellectuelle sup&#233rieure	6	65	veuf	3	2	84	83	83	83	11	10	86	33	9	8	0	39	20	34	158	71	69	1	-39	-14	1	53	1
2270	France	Homme	46	1	20	58	50	61	50	76	68	72	64	profession interm&#233diaire	5	79	mari&#233	1	2	69	71	72	0	50	68	50	35	50	60	31	32			187	88	89	-2	-1		-10	15	-18
2271	France	Femme	35	2	98	98	100	98	100	4	100	0	97	profession interm&#233diaire	4	100	PACS&#233	1	2	62	49	50	50	72	75	31	2	50	84	3	21	58	100	165	62	62	13	-18	-42	-34	29	-3
2272	France	Homme	31	2	0	16	0	0	0	81	0	90	12	cadre et profession intellectuelle sup&#233rieure	5	79	mari&#233	1	0	78	58	76	69	59	39	67	58	35	35	36	45	0	0	180	81	81	20	-9	0	0	9	20
2273	France	Homme	33	1	66	77	65	72	75	36	68	42	76	profession interm&#233diaire	5	72	mari&#233	1	2	39	72	88	88	62	52	64	41	65	36	28	44	34	50	182	68	69	-33	-16	-16	29	23	10
2275	France	Homme	38	1				69	71	29			69	cadre et profession intellectuelle sup&#233rieure	5	78	PACS&#233	1	2	93	93	90	91											184	81	80	0
2278	France	Femme	30	2	98	92	23	100	28	32	82	85	7	&#224 la recherche d'un emploi	2	100	PACS&#233	1	2	52	79	73	100	34	86	53	19	48	67	43	0	12	88	168	122	111	-27	43	-76	-19	34	-52
2279	France	Femme	31		50	50	7	63	50	54	50	71	25	cadre et profession intellectuelle sup&#233rieure	6	50	c&#233libataire	2	0	75	75	78	80	21	67	81	64	18	21	3	0	3	9	157	58	56	0	3	-6	-3	17	-46
2284	France	Femme	57	2	72	73	73	51	50	70	70	70	37	profession interm&#233diaire	2	90	mari&#233	1	3	80	85	81	82	22	56	75	11	32	69	15	13	14	50	165	60	58	-5	2	-36	-37	64	-34
2286	France	Femme	41	1	79	100	82	89	76	0	100	29	26	cadre et profession intellectuelle sup&#233rieure	5	100	PACS&#233	1	3	96	20	28	24		83	97	8	77	89	0	0	0	73	168	63	65	76	0	-73	-12	89
2288	France	Femme	45	2	50	50	75	50	75	50	50	69	30	profession interm&#233diaire	4	60	mari&#233	1	2	50	50	50	50	50	50	50	31	50	76	17	72	18	16	153	75	75	0	-55	2	-26	19	0
2290	France	Femme	39			75		75	59	9	75		71	cadre et profession intellectuelle sup&#233rieure	6	80	c&#233libataire	2	0	100	89	74	74	2	50					0	0			166	64	64	11	0				-48
2291	France	Femme	35	1	81	84	30	96	84	50	94	50	100	profession interm&#233diaire	2	77	c&#233libataire	2	0	71	20	25	24	23	74	80	29	4	51	3	75	22	81	160	105	105	51	-72	-59	-47	51	-51
2293	France	Femme	31	2	64	76	34	50	60	38	65	87	0	&#224 la recherche d'un emploi	4	93	concubinage	1	1	100	84	84	84	20	68	88	53	50	50	4	0	33	52	158	53	54	16	4	-19	0	35	-48
2294	France	Homme	58	1	16	16	13	94	91		50	50		ouvrier	2	13	mari&#233	1	1	80	22	50		61	61	50	50			50	50	2	7	175	66	66	58	0	-5		0	0
2295	France	Homme	33	2	26	23	15	16	68	41	19	70	70	profession interm&#233diaire	4	74	concubinage	1	0	50	50	50	50	18	21	50	50	72	23	50	50	17	24	182	75	76	0	0	-7	49	0	-3
2296	France	Homme	24	1	29	60	15	78	63	59	60	38	62	profession interm&#233diaire	4	79	c&#233libataire	2	0	67	25	25	10	50	65		26	42	65	41	100	37	39	180	75	75	42	-59	-2	-23		-15
2297	France	Femme	42		5	31	25	21	71	21	50	50	15	cadre et profession intellectuelle sup&#233rieure	5	82	mari&#233	1	3	98	97	97	97	25	40	81	64	9	25	2	2	91	91	160	62	62	1	0	0	-16	17	-15
2298	France	Homme	59	1	96	79	5	99	11	17	85		13	ouvrier	2	83	mari&#233	1	0	92	16	20	22			93	16			11	4		90	160	73	73	76	7			77
2299	France	Homme	30		50	67	14	100	29	29	67	18	15	cadre et profession intellectuelle sup&#233rieure	6	75	mari&#233	1	0	98	69	75	74	15		84	33	22	23	19	35	11	76	169	105		29	-16	-65	-1	51
2301	France	Femme	39	2	85	99	86	98	100	2	97	25	88	profession interm&#233diaire	4	97	concubinage	1	1	73	99	96	97	72	98	34	6	15	83	26	26	25	86	152	52	52	-26	0	-61	-68	28	-26
2303	France	Femme	33	1	74	74	75	90	88	14	66	62	70	profession interm&#233diaire	4	96	c&#233libataire	2	1	50	0	50	50	50	77	50	24	50	61	28	100	50	66	161	68	74	50	-72	-16	-11	26	-27
2304	France	Femme	22	1	50	14	15	50	50	72	25	77	50	profession interm&#233diaire	2	100	PACS&#233	1	0	33	9	42	11	10	18	62	58	29	16	90	99	1	34	150	52	52	24	-9	-33	13	4	-8
2305	France	Femme	42	1	80	77	50	79	89	92	50	50		ouvrier	2	87	mari&#233	1	2	100	93	100	94			85	50	74	50	0	0	86	95	159	55	56	7	0	-9	24	35
2307	France	Femme	39	2	100	98	100	100	100	100	97	100		ouvrier	4	97	c&#233libataire	2	2	100	6	0	5	3	98	100	95	0	100	3	98	5	97	165	56	60	94	-95	-92	-100	5	-95
2308	France	Femme	26	2	21	79	23	87	74	20	17	70	78	cadre et profession intellectuelle sup&#233rieure	5	76	concubinage	1	0	62	63	65	64	58	76	65	40	34	57	43	32	35	27	158	62	63	-1	11	8	-23	25	-18
2309	France	Femme	56	2	53	66	29	32	50	65	67	50	1	cadre et profession intellectuelle sup&#233rieure	5	100	mari&#233	1	2	100	3	29	16	50	50	72	37	50	50	7	26	50	57	160	50	51	97	-19	-7	0	35	0
2310	France	Homme	29	2	40	39	2	0	0	0	59	100	0	profession interm&#233diaire	5	76	PACS&#233	1	0	100	70	75	76	18	13	72	69	41	43	19	28	49	50	175	56	56	30	-9	-1	-2	3	5
2311	France	Femme	47	1	70	85	73	89	70				26	profession interm&#233diaire	4	85	mari&#233	1	1	86	88	86	88	50	50	84	65	74	76	11	12	50	66	162	79	79	-2	-1	-16	-2	19	0
2314	France	Femme	41	2	85	63	71	99			73	70	39		2	96	mari&#233	1	4	91	41	40	41		68	79	38			17	74			170	103	106	50	-57			41
2320	France	Femme	29	1	61	67	77	79	92	89		57		cadre et profession intellectuelle sup&#233rieure	5	98	mari&#233	1	1	75	23	25	27	16	82	70		19	37	1	67	32		163	57	57	52	-66		-18		-66
2321	France	Femme	39	2	68	57	76		61	62	43	42	98	profession interm&#233diaire	4	100	concubinage	1	3	95	32	50	34	32	82	75	50	32	50	3	50	2	30	180	129	132	63	-47	-28	-18	25	-50
2323	France	Homme	22	2	17	17	69	0	73	27	15	61	0	&#233l&#232ve ou &#233tudiant	5	86	c&#233libataire	2	0	78	76	82	85	26	62	38	28	24	11	0	0	10	18	184	66	66	2	0	-8	13	10	-36
2324	France	Femme	27	1	0	15	15	12	8	11	10	50	0	profession interm&#233diaire	5		concubinage	1	0	100	96	99	100							0	0	4	1	173	65	65	4	0	3
2325	France	Femme	35		100	99	98	97	98	3	29	3	9	profession interm&#233diaire	2	97	concubinage	1	0	62	0	0	2	41	69	28	6	35	77	75	99	66	82	163	95	97	62	-24	-16	-42	22	-28
2326	France	Femme	39	2	76	100	77	100	87	0	98	0	82	profession interm&#233diaire	4	100	concubinage	1	1	71	33	43	25	67	98	39	0	20	99	36	65	29	80	164	52	52	38	-29	-51	-79	39	-31
2328	France	Femme	31	1	23	6	19	23	16	81	25	72	24	cadre et profession intellectuelle sup&#233rieure	4	72	PACS&#233	1	1	93	36	63	38							28	70	5	7	161	91	91	57	-42	-2
2329	France	Femme	44	2	32	24	9	14	11	70	17	72	14	cadre et profession intellectuelle sup&#233rieure	5		concubinage	1	3	82	23	23	30			66	82	50	39	12	10			157	47	47	59	2		11	-16
2330	France	Femme	45	1	12	50	9	82	21	97	50	97	1	cadre et profession intellectuelle sup&#233rieure	5	95	mari&#233	1	2	50	50	50	50	32	32	77	79	26	27	24	24	25	24	172	68	68	0	0	1	-1	-2	0
2331	France	Femme	56	2	70	81	38	38	18	18	19	18	16	profession interm&#233diaire	4	100	PACS&#233	1	2	81	80	80	80											160	65	67	1
2332	France	Femme	40	2	98	98	98		93	0	99	17		&#224 la recherche d'un emploi	2	93	mari&#233	1	3	96	61	61	59	10	68	78	15	85	19	15	22	23	71	165	55	55	35	-7	-48	66	63	-58
2334	France	Femme	32	1	70			34	64	69	39			ouvrier	2		autre		1	61	24	66	67	55	55	58	56	50		59	77			167	109	111	37	-18			2	0
2337	France	Femme	49	2	50	50	50	50	99	99	66	80	50	profession interm&#233diaire	5	97	mari&#233	1	4	75	1	1	2	37	63	44	79	50	79	66	11	5	3	162	56	56	74	55	2	-29	-35	-26
2338	France	Femme	34	1	60	56	16	50	50	38	59	50	34	cadre et profession intellectuelle sup&#233rieure	6	81	c&#233libataire	2	0	83	50	59	68	50	59	50	38	17	25	28	30	50	50	170	56	54	33	-2	0	-8	12	-9
2339	France	Femme	51	1	50	50	50	100	99	50	50	50	78	cadre et profession intellectuelle sup&#233rieure	1	100	veuf	3	1	100	100	100	97	50	50	50	50	50	50	0	0	50	50	163	62	62	0	0	0	0	0	0
2340	France	Femme	30	2	91	100	92	79	98	38	94	100	37	&#224 la recherche d'un emploi	1	87	concubinage	1	3	90	19	17	17	30	81	78	20	57	67	37	36	84	84	160	118	116	71	1	0	-10	58	-51
2341	France	Femme	62	1	19	21	23	24	41	29	29	52	13	cadre et profession intellectuelle sup&#233rieure	5	50	c&#233libataire	2	1	75	73	78	80	22	24	86	73	34	34	68	70	19	20	152	59	59	2	-2	-1	0	13	-2
2342	France	Femme	44	2	0	50	50	50	50	34	50	32	0	cadre et profession intellectuelle sup&#233rieure	4	97	mari&#233	1	3	100	100	100	100	31	31	76	73	29	26	26	62	16	14	185	89	88	0	-36	2	3	3	0
2343	France	Femme	25		58	78	59	70	21	64	66	78	24	&#233l&#232ve ou &#233tudiant	6	65	concubinage	1	0	73	23	19	12	62	34	62	35	62	33	34	62	3	9	169	53	53	50	-28	-6	29	27	28
2344	France	Femme	44	1	12	69	16	89	89	17	18	76	77	cadre et profession intellectuelle sup&#233rieure	5	100	mari&#233	1	2	86	61	100	80	78	78	66	72	39	43	15	12	29	25	160	55	56	25	3	4	-4	-6	0
2346	France	Femme	37	2			72	72	77			62	100	profession interm&#233diaire	4		mari&#233	1	2	88	31	30	34							30	77			160	55	55	57	-47
2347	France	Femme	32	1	99	99	99	97	99	2	96		98	profession interm&#233diaire	2	71	c&#233libataire	2	2	98	99	100	98											165	77	77	-1
2348	France	Femme	50	1	22	86	75	88	82	37	80	71	67	profession interm&#233diaire	4	80	mari&#233	1	4	96	23	33	34	50	64	82	50	23	50	11	20	16	24	174	90	87	73	-9	-8	-27	32	-14
2349	France	Femme	58	1	79	81	81	82	63	83	85		50	profession interm&#233diaire	2	95	mari&#233	1	2	97	8	13	7			76	33			10	50		66		60		89	-40			43
2350	France	Homme	39	2	10	10	11	13	8	30	15	42	37	profession interm&#233diaire	5	88	c&#233libataire	2	0	83	27	26	26	50	50	85	17	71	27	25	74	0	0	178	70	70	56	-49	0	44	68	0
2351	France	Femme	36	2	28				62	29				cadre et profession intellectuelle sup&#233rieure	5	69	c&#233libataire	2	0	100	64	64	68	22	50	90	43	59	32	6	73	76	89	168	56	56	36	-67	-13	27	47	-28
2352	France	Femme	53	2	50	50	50	50	3	50	50	50	3	cadre et profession intellectuelle sup&#233rieure	5	100	mari&#233	1	1	100	78	79	83	50	50	50	50	50	50	50	50	50	50	160	85	85	22	0	0	0	0	0
2353	France	Femme	51	1	1		98	98		78		76	76		1	96	mari&#233	1	2	73	3	17	17		67					29	78	4	2	170	79	81	70	-49	2
2354	France	Femme	37	1	38	75	50	89	58	72	72	62	21	profession interm&#233diaire	4	82	PACS&#233	1	2	76	23	26	26	21	86	87	37	27	28	18	21	10	14	168	65	65	53	-3	-4	-1	50	-65
2355	France	Femme	45	2	89	82	79	50	87	33	72	31	28	profession interm&#233diaire	4	100	mari&#233	1	1	56	60	60	62	50	76	88	50	58		6	18	34	72	168	60	59	-4	-12	-38		38	-26
2357	France	Femme	31		100	100	100	100	71	0	100	25	76	profession interm&#233diaire	5	100	c&#233libataire	2	0	100	0	0	0	14	100	77	0	26	100	0	100	17	17	160	60	60	100	-100	0	-74	77	-86
2358	France	Femme	20	2	20	72	65	0	2	39	24	37	0	&#233l&#232ve ou &#233tudiant	4	83	autre		0	50	66	92	89	16	35	80	36	13	12	8	8	3	2	170	57	58	-16	0	1	1	44	-19
2359	France	Femme	52	1	73	74	16	53	81	66	72	89	27	ouvrier	2	31	mari&#233	1	2	50	50	50	50	50	63	50	43	50	61	38	39	46	69	158			0	-1	-23	-11	7	-13
2360	France	Femme	52	2	50	50	4	50	31	32	17	50		&#224 la recherche d'un emploi	4	91	mari&#233	1	2	96	71	72	75	19	63	85	73	75	61	13	28	50	50	165	73	73	25	-15	0	14	12	-44
2361	France	Homme	35	1	99	97	90	96		12	94		77	cadre et profession intellectuelle sup&#233rieure	4	91	mari&#233	1	2	40	32	35	31				31				78	52	87	183	91	93	8		-35
2362	France	Femme	33	2	39	58	21	21	20	71	20	51	2	cadre et profession intellectuelle sup&#233rieure	6	89	mari&#233	1	1	92	61	74	38	63	62	35	36	41	42	2	27	25	23	156	49	49	31	-25	2	-1	-1	1
2363	France	Femme	60	1	67	64	61		39	63	62	63		profession interm&#233diaire	2	100	PACS&#233	1	0	66	30	24	34	0	56	70	27	7	16	6	0	12	21	164	53	53	36	6	-9	-9	43	-56
2364	France	Femme	36	2	25	57	26		50	50	53	72		ouvrier	2	73	PACS&#233	1	1	80	67	65	68	50	50	50	50	50	50	18	24	50	50	160	49	49	13	-6	0	0	0	0
2366	France	Femme	29	1	3	7	0	0	0	86	10	99	0	profession interm&#233diaire	4	68	concubinage	1	0	75	76	55	62	49	50	58	58	22	21	50	34	0	0	153	58	58	-1	16	0	1	0	-1
2367	France	Homme	49	2			1	1	76	13	0	17	14	cadre et profession intellectuelle sup&#233rieure	5	97	concubinage	1	2	98	77	95	86	12	14	100	70	4	17	3	1	30	31	161	75	75	21	2	-1	-13	30	-2
2368	France	Femme	29	2										profession interm&#233diaire	2	79	concubinage	1	1	100	72	100	76	1	81	100	62	0	100	0	18	29	73	178	88	88	28	-18	-44	-100	38	-80
2369	France	Femme	55	1	68	76	50	60	12	14	50	62	32	cadre et profession intellectuelle sup&#233rieure	6	87	mari&#233	1	2	95	83	85	89	61	50	50	40	71	49	2	10	26	59	160	65	65	12	-8	-33	22	10	11
2372	France	Femme	41	1		69	90	97	94			94		profession interm&#233diaire		91	mari&#233	1	2	90	81	81	82					79			1			159	50	50	9
2373	France	Femme	34	2	96	97	59	100			96	100			2	100	mari&#233	1	2	100	25	16	64	3		100		2	3	2	99	3	79	155	70	70	75	-97	-76	-1
2374	France	Femme	48	2	100	100	100			71	92	79	50	ouvrier	4	68	concubinage	1	2	95	0	63	57		88		31	29	50	24	86	15	16	163	88	84	95	-62	-1	-21
2375	France	Femme	40	1	75	90	90	98	98	16	98	19	83	profession interm&#233diaire	2	50	c&#233libataire	2	1	86	6	8	8	50	74	81	34	50	70	18	64	50	77	165	88	84	80	-46	-27	-20	47	-24
2377	France	Femme	54		50	66	21	70	82	28	50	27	78	profession interm&#233diaire	4	76	PACS&#233	1	3	71	72	89	79	50	76	50	35	50	64	26	25	50	50	168	52	52	-1	1	0	-14	15	-26
2378	France	Homme	34	1	100	93	100	99	95	17	94	18	98	ouvrier	2	89	PACS&#233	1	1	83	3	88	10	17	97	91	0	64	100	9	87	25	98	186	94	97	80	-78	-73	-36	91	-80
2381	France	Femme	42	1	87	89	73	90	18	18	84	79	22	cadre et profession intellectuelle sup&#233rieure	4	70	mari&#233	1	2	81	81	81	84	10	65	69	69	17	65	4	0	18	19	171	62	63	0	4	-1	-48	0	-55
2384	France	Femme	29	2	5	10	72	92	90	90	7	76	78	profession interm&#233diaire	4	100	PACS&#233	1	2	100	8	83	88	50	90	84	81	50	88	11	11	2	0	165	77	76	92	0	2	-38	3	-40
2386	France	Femme	41	2	83	87			79	19	79	22		artisan, commer&#231ant ou chef d'entreprise	2	82	mari&#233	1	2	100	100	100	100	61	100	100	56	50	84	0		73	88	163	72	70	0		-15	-34	44	-39
2387	France	Femme	47	1	50	96	97	96	98	4	98	99	50		2	96	mari&#233	1	2	50	50	50	50	50	50	75	29	50	79	17	19	4	50	177	77	75	0	-2	-46	-29	46	0
2388	France	Homme	43	2	67	69	65		62	21	70	59	0	&#224 la recherche d'un emploi	4	100	PACS&#233	1	1	25	66	60	65	66	78		36	68	67	67	28	66	80	179	130	135	-41	39	-14	1		-12
2390	France	Femme	58	2			67								4	78	mari&#233	1	0	100	0	0	0	0	81	100	17	7	85	0	12	50	50	168	64	60	100	-12	0	-78	83	-81
2391	France	Homme	50	2	50	17	75	18	69	50	20	20	2	cadre et profession intellectuelle sup&#233rieure	5	99	mari&#233	1	5	99	1	8	6	50	71	50	14	50	50	13	90	50	50	180	66	66	98	-77	0	0	36	-21
2393	France	Femme	26	1	30	63	100	82	74	16	60	76	66	profession interm&#233diaire	4	91	c&#233libataire	2	0	75	22	11	10	30	78	38	15	65	86	17	25	19	19	163	53	50	53	-8	0	-21	23	-48
2394	France	Femme	45	1	27	74	68	80	84	25	50	50	82	profession interm&#233diaire	4	73	concubinage	1	1	50	82	28	70	74	37	50	50	72	33	29	25	27	25	169	60	61	-32	4	2	39	0	37
2395	France	Femme	34	1	67	85	88	100	76	50	58	50	70	profession interm&#233diaire	4	27	PACS&#233	1	0	50	86	85	86	24	64	88	22	28	53	27	0	25	72	168	65	63	-36	27	-47	-25	66	-40
2396	France	Femme	49	1	80	77	77	80	11	74	19	17	48	profession interm&#233diaire	4	70	mari&#233	1	2	93	75	80	79	35	81	76	20	64	91	3	4	11	24	165	116	116	18	-1	-13	-27	56	-46
2397	France	Femme	51	2	57	71	23	83	25	23	50	68	39	cadre et profession intellectuelle sup&#233rieure	5	100	autre		3	100	50	35	36	31	62	55	46	59	62	17	68	18	18	167	70	72	50	-51	0	-3	9	-31
2398	France	Femme	33	1	83	77	50	28	75	4	77	30	30	profession interm&#233diaire	4	81	mari&#233	1	2	50	29	30	29	50	66	67	58	18	30	12	64	82	79	172	79	80	21	-52	3	-12	9	-16
2399	France	Femme	34	1	83	82	73	100	33	30	85	33	32	profession interm&#233diaire	2	83	c&#233libataire	2	0	75	13	68	11	20	80	68	20	25	63	24	70	32	67	166	56	56	62	-46	-35	-38	48	-60
2400	France	Femme	37	2	26	30	30	100	26	77	27	67	0	profession interm&#233diaire	4	82	c&#233libataire	2	1	66	58	62	69	38	50	91	72	20	27	73	52	100	50	162	54	53	8	21	50	-7	19	-12
2402	France	Femme	45					76	77	0			67	cadre et profession intellectuelle sup&#233rieure	5	90	mari&#233	1	0	49	81	81	82	22		75		17	71	18	29			161	64	65	-32	-11		-54
2405	France	Femme	32	2	69	72	68	22	12	96	28	63	17	cadre et profession intellectuelle sup&#233rieure	6	94	mari&#233	1	1	97	82	79	96	34	65	64	50	26	76	4	16	15	12	168	68	69	15	-12	3	-50	14	-31
2406	France	Homme	51	2	13	68	12	50	62	31	67	31	50	profession interm&#233diaire	5	76	mari&#233	1	3	70	50	59	60	50	50	50	41	50	50	9	9	50	50	190	102	100	20	0	0	0	9	0
2407	France	Femme	49	1	12	77	77	68	61	18	65	34	21	cadre et profession intellectuelle sup&#233rieure	6	98	mari&#233	1	3	98	99	97	98	70	73	74	73			4	1	3	4	162	68	68	-1	3	-1		1	-3
2408	France	Femme	33	1	50	50	50	50	50	0	50	50	50	profession interm&#233diaire	5	100	c&#233libataire	2	0	66	34	36	40	74	75	56	44	50	50	50	50	55	55	161	57	57	32	0	0	0	12	-1
2409	France	Femme	55	2		85	79			14	57	35	0	profession interm&#233diaire	2	100	mari&#233	1	1	100	18	9	17	26	79	83	15	25	77	4	57	0	0	162	58	56	82	-53	0	-52	68	-53
2410	France	Homme	30	1	73	70	36	60	98	98	17	19		profession interm&#233diaire	4	97	autre		0	84	7	25	11	21	25	79				18	71		64	175	70	68	77	-53				-4
2411	France	Femme	47	1	75	75	50	87	50	84	80	50	50	profession interm&#233diaire	4	79	mari&#233	1	2	98	97	96	98	1	79	95	68	20	21	1	3	2	24	159	62	62	1	-2	-22	-1	27	-78
2412	France	Femme	54	1		77	78	26	6	33	50	50	19	profession interm&#233diaire	4	84	concubinage	1		100	100	100	100	10	33	86	50	16	17	7	17	14	12	163	58	58	0	-10	2	-1	36	-23
2413	France	Femme	30	2	74	55	57	60	65	82	37	66	39	ouvrier	4	78	concubinage	1	3	50	52	50	50	50	67	79	78	50	50	50	50	50	50	170	62	62	-2	0	0	0	1	-17
2414	France	Femme	40	1	36	22	32	58	79	39	28	60	74	profession interm&#233diaire	2	79	mari&#233	1	0	84	50	82		50	50	50	50	50	50	18	73	50	50	158	66	66	34	-55	0	0	0	0
2415	France	Homme	88	2	50	21	2		17	98	16			retrait&#233	6	78	mari&#233	1	3	70	72	76	77	14	26			13	14	12	11	12	14	172	70	70	-2	1	-2	-1		-12
2416	France	Femme	55	1	100	99	100	100			100	100		profession interm&#233diaire	2	96	mari&#233	1		100	0	18	12	12	100	55	3	50	87	2	78	17	100	156	48	48	100	-76	-83	-37	52	-88
2417	France	Homme	39	2	88	88	29	30	0	75	79	52	0	cadre et profession intellectuelle sup&#233rieure	5	72	c&#233libataire	2	0	89	20	23	27	20		87	26	83	24	77	77	22	82	183	131	129	69	0	-60	59	61
2418	France	Homme	47	2	89	89	73	63	60	32	61	68	73	cadre et profession intellectuelle sup&#233rieure	5	0	autre		3	95	17	27	29	22	97	78	54	71	37	0	28	28	85	165	69	70	78	-28	-57	34	24	-75
2419	France	Femme	60	1	73	75	62	91	77	31	64	14	63	profession interm&#233diaire	4	38	mari&#233	1	2	80	80	72	76	38	36	40	39	15	17	16	16	50	50	166	80	80	0	0	0	-2	1	2
2420	France	Femme	34	2	71	32	9		50	50	58	82	70	profession interm&#233diaire	5	94	PACS&#233	1	1	59	77	81	82	64	11	70	88	67	24	38	0	69	69	170	59	58	-18	38	0	43	-18	53
2421	France	Homme	22	1	31	88	6	85	59	70	72	16	14	ouvrier	2	77	c&#233libataire	2	0	65	88	81	78			52	55	50	66	50	82	50	50	180	78	79	-23	-32	0	-16	-3
2425	France	Femme	49	2	22	23	8	24	0	66	17	58	4	cadre et profession intellectuelle sup&#233rieure	4	61	mari&#233	1	1	50	50	50	50	50	50	50	50	50	50	20	40	50	50	160	52	53	0	-20	0	0	0	0
2426	France	Femme	59	1	66	100	67	100	50	50	100	73	50	profession interm&#233diaire	4	100	mari&#233	1	2	100	100	100	100	8	66	100	0	70	25	0	0	16	19	156	62	62	0	0	-3	45	100	-58
2427	France	Femme	30	2			0	93	73				79	profession interm&#233diaire	4	69	PACS&#233	1	2	68	67	69	71			62		28	66	0	20	1	15	159	52	50	1	-20	-14	-38
2428	France	Femme	46	2	91	97	96	93	92	4	82	18	79	profession interm&#233diaire	4	90	mari&#233	1	3	95	12	20	30	50	95	80	12	50	84	11	85	8	87	160	57	54	83	-74	-79	-34	68	-45
2429	France	Femme	40	1	3	1	2	2	74	15	1	21	12	profession interm&#233diaire	2	77	c&#233libataire	2	0	67	67	67	67	17	17	35	36	16	17	14	70	0	0	163	70	71	0	-56	0	-1	-1	0
2430	France	Femme	41	1	97	98	50	96	0					ouvrier	4	100	mari&#233	1	1	96	1	2	50	2	50	98	1	2	0	1	2	50	96	170	58	58	95	-1	-46	2	97	-48
2431	France	Homme	42	1	50	74	72	76	68	69	59	65	83	ouvrier	2	80	concubinage	1	2	50	50	50	50	49	72	49	25	49	68	25	27		53	178	75	75	0	-2		-19	24	-23
2432	France	Homme	46	1	57	50	21	74	80	53	29	50	65	cadre et profession intellectuelle sup&#233rieure	5	94	mari&#233	1	1	68	72	63	50	50	50	50	50	23	36	50	50	27	32	180	85	86	-4	0	-5	-13	0	0
2433	France	Femme	23	1	77	76		88	60	31	77	50	29	&#233l&#232ve ou &#233tudiant	5	92	c&#233libataire	2	0	75	70	72	57	29			22			23	23	6	14	163	60	58	5	0	-8
2434	France	Homme	26	1	16		64	14	29	82	21	31	12	&#233l&#232ve ou &#233tudiant	5	93	c&#233libataire	2	0	62	64	66	59	68	70	70	24	72	62	18	89	63	67	182	75	73	-2	-71	-4	10	46	-2
2436	France	Femme	23	2	6	31	33	39	75	24	50	59	8	&#233l&#232ve ou &#233tudiant	4	71	concubinage	1	0	43	69	39	78	14	16	35	64	13	15	21	42	2	1	169	59	59	-26	-21	1	-2	-29	-2
2437	France	Femme	33	1	14	34	28	64	5	24	62	50	0	profession interm&#233diaire	4	86	PACS&#233	1	2	97	50	34	38	34	67	84	77	50	50	8	8	21	20	159	62	62	47	0	1	0	7	-33
2439	France	Femme	29	1	63	100	85	100	100	18	73	50	100	profession interm&#233diaire	2	21	PACS&#233	1	1	100	100	100	100		100					0	0	0	28	165	58	58	0	0	-28
2440	France	Femme	38	2	0	65	73	74	24	79	6		28	cadre et profession intellectuelle sup&#233rieure	5	90	PACS&#233	1	2	97	28	29	30	31	82	68	67	74	48	3	25	0	0	173	68	68	69	-22	0	26	1	-51
2441	France	Femme	46	2		97				9	92	18		cadre et profession intellectuelle sup&#233rieure	5	95	PACS&#233	1	1	77	4	5	4	4	96	97	5	5	7	2	13		95	170	70	70	73	-11		-2	92	-92
2442	France	Femme	38	1	100	100	0	100	100	100	100	0	76	cadre et profession intellectuelle sup&#233rieure	4	78	mari&#233	1	2	100	21	23	0	24	100	100	1	0	83	0	53	16	84	158	94	94	79	-53	-68	-83	99	-76
2443	France	Femme	52	1	5	30	30	24	29	55			19		4	50	mari&#233	1	2	60	38	38	38							39	59	21	22	165	72	72	22	-20	-1
2444	France	Femme	39		82	100	75	82	100	70	82	50	50	profession interm&#233diaire	2	77	mari&#233	1	2	50	50	50	50	47	73	50	24	50	53	37	14	51	89	168	65	66	0	23	-38	-3	26	-26
2447	France	Femme	39	1	59	58	74	75		74	50	61	72	ouvrier	4		c&#233libataire	2	2	88	50	67	50	50	50	50	33	54	50	36	63	50	50	166	63	63	38	-27	0	4	17	0
2453	France	Femme	27	2	0	0	0	10	0	100	0	100	0	cadre et profession intellectuelle sup&#233rieure	6	23	c&#233libataire	2	0	50	50	50	50	0	0	100	100	50	50	19	25	0	1	165	66	65	0	-6	-1	0	0	0
2454	France	Femme	35	1	72	72	20	84	50	21	50	50	50	profession interm&#233diaire	4	21	PACS&#233	1	2	96	95	90	94	17	65	79	80	18	71	10	13	17	17	158	56	56	1	-3	0	-53	-1	-48
2456	France	Femme	38	1	31	27	15	57	70	70	30	64	28	profession interm&#233diaire	4	86	c&#233libataire	2	0	91	73	73	79	50						32	63	0	0	175	70	70	18	-31	0
2457	France	Homme	22	1	35			69	69	35	34		73	profession interm&#233diaire	4	78	concubinage	1	0	60	32	18	18	54	64	44	30				83	78	78	172	70	73	28		0		14	-10
2458	France	Homme	35	2	72	73	62	100		0				cadre et profession intellectuelle sup&#233rieure	5	77	PACS&#233	1	2	100	100	100	100		75			73	79	0				173	85	81	0			-6
2459	France	Femme	55	1	100	86	78	100	87	17	73	85	100	profession interm&#233diaire	2	83	mari&#233	1	2	71	43	44	44			74	57	65	66	41	83	54	62	166	53	57	28	-42	-8	-1	17
2460	France	Femme	38	2	12	16	16	86	50	50	50	50	69	cadre et profession intellectuelle sup&#233rieure	4	71	mari&#233	1	2	50	50	50	50	69	18	21	50	72	19	23	24	50	50	171	73	73	0	-1	0	53	-29	51
2461	France	Homme	59	1	12	11	7	8	8	50	8	9	11	ouvrier	2	84	mari&#233	1	2	84	73	74	76	20	24	50	50	22	25	21	37	50	50	170	85	85	11	-16	0	-3	0	-4
2462	France	Homme	42	2	74	76	63	98	2	78	70	28	0	profession interm&#233diaire	4	32	c&#233libataire	2	0	71	50	50	50	37	40	38	40	31	33	27	32	73	89	188	165	162	21	-5	-16	-2	-2	-3
2464	France	Femme	19	2	36	18	20	71	32	27	64	64	20	&#233l&#232ve ou &#233tudiant	2	73	c&#233libataire	2	0	34	66	72	24	76	33	70	56	20	39	77	28	66	64	159	59	58	-32	49	2	-19	14	43
2465	France	Femme	47	1	74	74	66	93	71	39	68	61	43	ouvrier	4	81	c&#233libataire	2	1	88	78	90	75	12	62	92	37	13	61	12	20	7	22	170	89	87	10	-8	-15	-48	55	-50
2466	France	Femme	67	1	67	69	61	91	87	37	70	58	68	profession interm&#233diaire	2	85	mari&#233	1	2	74	27	33	28	22	58	85	72	22	35	18	16	64	83	160	80	80	47	2	-19	-13	13	-36
2467	France	Femme	41	2	65	71	0	0	50	30	63	38	70	profession interm&#233diaire	4	100	autre		2	70	26	36	33	30		72	50		55	26	0	21	59	170	96	97	44	26	-38		22
2468	France	Femme	22	1	77	63	45	94	74	50			61		4	83	concubinage	1	0	60	16	15	11				50			12	85			164	49	49	44	-73
2469	France	Femme	31	2	57	59	58	75	57	74	69	43	56	cadre et profession intellectuelle sup&#233rieure	5	75	concubinage	1	0	98	34	35	36	7	37	98	65	75	35	1	19	43	32	166	54	55	64	-18	11	40	33	-30
2470	France	Femme	50	2	50	50	80	90	91	80	50	59	3	profession interm&#233diaire	2	45	mari&#233	1	2	100	99	98	100	50	50	50	50	50	50	0	1	50	50	157	75	76	1	-1	0	0	0	0
2472	France	Femme	30	1	30	27	23	26	21	50	23	71	24	profession interm&#233diaire	4	69	PACS&#233	1	1	86	35	35	40	50	50	50	50	50	50	50	50	50	50	160	60	60	51	0	0	0	0	0
2473	France	Femme	57	1	98	99	67	98	100	100	100	81	81	profession interm&#233diaire	4	50	c&#233libataire	2	3	87	50	50	50	50	76	50	28	50	86	21	39	50	78	178	48	48	37	-18	-28	-36	22	-26
2474	France	Femme	28	1	80	100	66	100	50	66	80	23	50	profession interm&#233diaire	2	16	concubinage	1	1	100	10	88	14	0	80	99	33	20	50	2	1	0	3	170	66	66	90	1	-3	-30	66	-80
2475	France	Homme	46	2	57	58	13	50	56	67	54	61	65	&#224 la recherche d'un emploi	5	82	c&#233libataire	2	0	72	73	74	73	65	63	57	43	55	58	30	28			170	80	80	-1	2		-3	14	2
2476	France	Homme	33	2			26	66	13	13	31	68	38	cadre et profession intellectuelle sup&#233rieure	5	80	mari&#233	1	1	67	45	45	40	58	57	82	75	37	36	32	25	17	23	178	68	68	22	7	-6	1	7	1
2477	France	Femme	28	2	76	100	28	74	100	18	78	50	10	profession interm&#233diaire	5	89	PACS&#233	1	0	91	78	75	92	81	16	69	50	79	25	12	17	19	75	159	54	55	13	-5	-56	54	19	65
2478	France	Homme	29	1	37	31	16	70	23	81	35	72	16	cadre et profession intellectuelle sup&#233rieure	5	100	concubinage	1	0	65	52	56	58	42	61	69	66	49	50	34	58	0	0	171	75	75	13	-24	0	-1	3	-19
2479	France	Homme	31	1	67	69	47	69	67	80	59	61	27	cadre et profession intellectuelle sup&#233rieure	6	79	mari&#233	1	1	85	64	75	58	28	30	80	50	22	21	18	38	37	61	174	65	64	21	-20	-24	1	30	-2
2481	France	Femme	43	2	15	50	50	26	27	71	50	81	16	profession interm&#233diaire	4	93	mari&#233	1	3	50	50	50	50	23	50	78	68	57	58	7	9	50	50	158	53	53	0	-2	0	-1	10	-27
2482	France	Femme	38	1	88	87	86	82	28	73	82	81	76	profession interm&#233diaire	4	93	mari&#233	1	2	82	90	58	62	14	82	91	25	12	92	9	75	32	86	169	55	55	-8	-66	-54	-80	66	-68
2484	France	Femme	59	2	50	10	7	50	7	76	13	73	13	cadre et profession intellectuelle sup&#233rieure	5	75	mari&#233	1	2	79	53	51	51	31	32	72	45	64	62	8	50	12	11	157	57	56	26	-42	1	2	27	-1
2486	France	Femme	27	1	16	72	75	70	75	26	67	33	74	profession interm&#233diaire	4	68	concubinage	1	0	85	13	19	15	31	71	50	50	69	72	10	89	13	15	161	47	48	72	-79	-2	-3	0	-40
2488	France	Femme	55	2	84	99	55	87	62	72	88	62	50	ouvrier	4	82	PACS&#233	1	0	100	11	26	32	62	11	100	23	31	10	0	75	50	66	158	54	53	89	-75	-16	21	77	51
2489	France	Femme	39	2	12	90	92	91	37	73	5	17	39	cadre et profession intellectuelle sup&#233rieure	6	83	PACS&#233	1	2	79	70	19	26	50	50	42	22	34	68	33	71	24	65	175	65	65	9	-38	-41	-34	20	0
2491	France	Femme	46	1	0	0	0	0	0		0	100	0	profession interm&#233diaire	4		c&#233libataire	2	2	100	99	95	98	2	23	74	78			5	48			175	52	53	1	-43			-4	-21
2493	France	Femme	29	2	63	32	12	4	0	97	23	82	4	cadre et profession intellectuelle sup&#233rieure	6	73	mari&#233	1	1	71	12	7	14	23	50	84	33	86	27	12	73	1	2	181	80	85	59	-61	-1	59	51	-27
2495	France	Femme	61	2	93	72	78	15	17		86	72	14	cadre et profession intellectuelle sup&#233rieure	4	87	concubinage	1	2	94	15	36	34	41	82	87	18			9	58	26	77	170	74	77	79	-49	-51		69	-41
2496	France	Femme	34	2	28	65	78	82	70	24	33	50	62	cadre et profession intellectuelle sup&#233rieure	5	24	PACS&#233	1	2	75	69	68	67	58	97	58	58	88	93	20	20	50	68	157	56	55	6	0	-18	-5	0	-39
2497	France	Homme	54		68	82	63	78	77	85	86	63	81	cadre et profession intellectuelle sup&#233rieure	6	89	mari&#233	1	5	89	61	91	68	32	31	62	50	71	62	10	20	29	30	176	82	85	28	-10	-1	9	12	1
2498	France	Femme	47	1	16	20	2	20	18	80	19	69	2	profession interm&#233diaire	4	19	PACS&#233	1	1	98	73	72	75	10	31	79		14		29	29	13	32	150	55	56	25	0	-19			-21
2499	France	Femme	38	2	90	81	76		88	0	100	12		artisan, commer&#231ant ou chef d'entreprise	2	100	c&#233libataire	2	2	50	50	50	50	35	65	50	28	59	83	70	90	58	58	166			0	-20	0	-24	22	-30
2501	France	Femme	59	2	100	100		100		79	100			cadre et profession intellectuelle sup&#233rieure	6	100	mari&#233	1	2	100	99	100	99											156	63	63	1
2503	France	Femme	25		82	100	93	91	94	100	78	86	60	cadre et profession intellectuelle sup&#233rieure	6	85	c&#233libataire	2	0	89	0	0	21	38	83	86	12	73	74	19	61	0	0	167	58	58	89	-42	0	-1	74	-45
2505	France	Femme	33	1	0	51	2	98	100	0	50	50	100	profession interm&#233diaire	5	100	mari&#233	1	1	100	100	100	100	0	0	100	52	0	88	0	0	0	0	155	86	86	0	0	0	-88	48	0
2507	France	Femme	33	1	96	92	91	100	66			16		profession interm&#233diaire	5	72	PACS&#233	1	2	72	61	75	71		79		10		87	18	17		64	160	60	62	11	1
2508	France	Femme	27	2	73	88	90	20	90	85	78	67	5	cadre et profession intellectuelle sup&#233rieure	6	99	PACS&#233	1	0	91	13	33	31	9	50	94	59	50	34	2	74	3	70	170	56	58	78	-72	-67	16	35	-41
2509	France	Femme	41	2	54	28	27		24	23	21		15	profession interm&#233diaire	5	87	concubinage	1	1	93	24	55	50									0	0	161	65	65	69		0
2510	France	Femme	22	2	44	10	9	25	35	76	6	41	11	&#233l&#232ve ou &#233tudiant	4	85	c&#233libataire	2	0	85	39	65	37	28	39	90	57	87	71	7	37	2	8	164	51	51	46	-30	-6	16	33	-11
2511	France	Femme	20	2	75	78	23	3	37	35	70	82	4	&#233l&#232ve ou &#233tudiant	4	95	c&#233libataire	2	0	76	37	77	76	88	27	75	71	80	58	50	50	7	21	173	61	61	39	0	-14	22	4	61
2512	France	Homme	66		60	71	50		15	12	50	70	12	cadre et profession intellectuelle sup&#233rieure	6	85	mari&#233	1	2	72	50	50	64	74	74	86	70	20	18	12	50	15	26	187	98	95	22	-38	-11	2	16	0
2514	France	Femme	35	1	14		2	74	75			34		cadre et profession intellectuelle sup&#233rieure	6	71	c&#233libataire	2	0	50	63	55	55	5	38	83	39	16	25	16	6	1	1	173	56	58	-13	10	0	-9	44	-33
2516	France	Femme	49	2	100	100	33	100	50	85	100	66	68	profession interm&#233diaire	2	100	mari&#233	1	2	89	39	39	43	66	34	83	51	70	31	0	60	59	98	165	88	88	50	-60	-39	39	32	32
2517	France	Femme	30	1	72	98	39	98	99	100	99	100	74	cadre et profession intellectuelle sup&#233rieure	5	70	c&#233libataire	2	0	84	96	98	29	73	97	43	2			25	5	29	71	153	50	52	-12	20	-42		41	-24
2518	France	Femme	51	1	50	85	68	84	97	18	28	37	97	profession interm&#233diaire	4	100	mari&#233	1	3	50	50	50	50	50	50	72	50	50	50	17	19	50	50	170	77	75	0	-2	0	0	22	0
2519	France	Femme	29	2	71	69	70	50	50	58	75	50	25	profession interm&#233diaire	4	31	c&#233libataire	2	0	73	33	30	31	34	38	65	40	40	66	37	37	50	50	170	67	68	40	0	0	-26	25	-4
2520	France	Femme	37	2	62	97	97	85	99	7	80	6	100	profession interm&#233diaire	4	40	c&#233libataire	2	2	47	19	18	22	50	82	50	28	77	47	18	96	50	50	151	51	51	28	-78	0	30	22	-32
2522	France	Femme	46	1	85	88	73	83	92	92	65	66	66	cadre et profession intellectuelle sup&#233rieure	5	77	PACS&#233	1	2	67	68	69	70	50	71	50	39	67	84	50	50	50	66	167	62	64	-1	0	-16	-17	11	-21
2523	France	Homme	55	2	71	83	80	45	66	67	68	85	67	cadre et profession intellectuelle sup&#233rieure	4	75	mari&#233	1	1	76	29	29	22	29	79	67	12	50	50	0	76	27	70	170	83	81	47	-76	-43	0	55	-50
2524	France	Femme	25	1	63	100	100	75	100	73	100	75	56	profession interm&#233diaire	4	81	c&#233libataire	2	0	75	43	75	31	19	100	80	25	51	51	11	100			167	69	69	32	-89		0	55	-81
2525	France	Femme	49	1	84	86	12	100	99	73	100	69	86	profession interm&#233diaire	4	50	PACS&#233	1	2	76	23	28	22	50	71	77	21	72	71	23	68	24	75	158	65	65	53	-45	-51	1	56	-21
2526	France	Femme	32	1	73	76	100	50	0	0	99	50	2	profession interm&#233diaire	4	100	c&#233libataire	2	0	100	26	27	50	30	71	100	34	78	34	0	59	49	50	170	60	60	74	-59	-1	44	66	-41
2528	France	Femme	48	1	50	81	51	84	83	99	25	50	85	profession interm&#233diaire	4	61	mari&#233	1	1	77	97	97	96	59	48	32	50	50	71	3	3	1	1	175	72	72	-20	0	0	-21	-18	11
2530	France	Femme	37	2	50	50	48	50	50	50	50	50	50	profession interm&#233diaire	4	100	concubinage	1	0	100	72	14	19	50	50	45	23	50	50	37	74	50	50	168	52	52	28	-37	0	0	22	0
2531	France	Femme	43	1	24	76	66	68	89	12	79	42	18	cadre et profession intellectuelle sup&#233rieure	5	91	PACS&#233	1	2	100	33	52	35	16	56	86	66	11	50	4	14	25	36	164	58	60	67	-10	-11	-39	20	-40
2532	France	Femme	23	1	59	70	53	85	67	28	59	36	13	profession interm&#233diaire	4	57	concubinage	1	0	73	40	37	55	43	59	59	45	60	60	16	75	63	69	160	52	52	33	-59	-6	0	14	-16
2533	France	Femme	40	2			80	98		18	82	68	24	ouvrier	2	100	mari&#233	1	4	98	33	37	38	30	40		42			3	12	8	10	172	68	70	65	-9	-2			-10
2534	France	Femme	43	2	76	23	3	82	84	18	80	80	21	profession interm&#233diaire	4	92	mari&#233	1	1	100	100	62	98	7	7	82	90	15	17	7	13	93	93	165	67	68	0	-6	0	-2	-8	0
2535	France	Femme	47	2	78	79	74	82	79		63	63	65	profession interm&#233diaire	2	86	mari&#233	1	0	90	24	23	21	61	87	73	50	78	100	15	25	65	67	172	74	74	66	-10	-2	-22	23	-26
2537	France	Homme	33	2	78	82	49	50	50	20	50	26	50	profession interm&#233diaire	5	87	concubinage	1	0	91	26	20	21	50	50	50	50	50	50	25	70	12	27	182	82	83	65	-45	-15	0	0	0
2538	France	Femme	30	2	50	50	35	50	20	50	50	50	14	cadre et profession intellectuelle sup&#233rieure	5	100	concubinage	1	0	50	34	25	58	50	50	50	50	50	50	41	75	50	50	163	55	55	16	-34	0	0	0	0
2539	France	Femme	27	2	63	73	28	0	70	23	74	25	25	&#224 la recherche d'un emploi	6	76	concubinage	1	0	72	74	76	78	29	30	38	39	24	25	25	29	1	1	168	65	65	-2	-4	0	-1	-1	-1
2540	France	Femme	47	2	25	50	84	100	50	50	77	29	100	profession interm&#233diaire	2	98	PACS&#233	1	2	50	50	50	50	100	100	17	16	50	50	15	5	50	50	165	64	64	0	10	0	0	1	0
2541	France	Femme	46	2	64	68	3	2	3	0	50	3	3	profession interm&#233diaire	2	79	mari&#233	1	3	78	79	84	86	12	15	85	87	33	33	0	3	4	52	173	93	90	-1	-3	-48	0	-2	-3
2542	France	Femme	32	2	100	100	100	0	100	0	100	0	0	cadre et profession intellectuelle sup&#233rieure	6	100	mari&#233	1	2	100	0	0	0	0	100	100	0	50	50	0	81	0	100	167	67	65	100	-81	-100	0	100	-100
2543	France	Femme	49	2	63	32	10	8	4	5	1	6	18	cadre et profession intellectuelle sup&#233rieure		79	c&#233libataire	2	1	75	32	68	69	6	6	93	83	14	15	23	80	3	1	169	54	55	43	-57	2	-1	10	0
2544	France	Homme	23	1				75			68			profession interm&#233diaire	4	66	c&#233libataire	2	0	68	70	71	66	35	38	70		34	35	31	31			173	72	72	-2	0		-1		-3
2546	France	Homme	24	2	84	87	96	100	24	17	65	28	50	artisan, commer&#231ant ou chef d'entreprise	4	97	concubinage	1	0	100	64	64	90	22	78	89	24	90	24	15	84	18	46	158	57	56	36	-69	-28	66	65	-56
2547	France	Femme	41	2	77	65	65	70	17	100	25	78	3	profession interm&#233diaire	5	82	mari&#233	1	3	99	98	99	100	34	36	84	87	3	3	27	3	50	72	166	59	59	1	24	-22	0	-3	-2
2548	France	Femme	46	1	21	78	83	93	89	23	81	25	73	ouvrier	2	50	mari&#233	1	2	90	80	82	93	44	83	25	30	29	83	20	5		82	160	60	61	10	15		-54	-5	-39
2550	France	Femme	40	2	16	78	38	50	78	5	51	50	50	artisan, commer&#231ant ou chef d'entreprise	5	93	mari&#233	1	2	54	37	50	37	57	37	32	31	61	40	34	61	24	24	170	72	75	17	-27	0	21	1	20
2551	France	Femme	28	1	100	77	12	100	77	81	78	79	76	ouvrier	4	91	mari&#233	1	1	93	26	30	25	13	15	95	76	16	8	16	24	28	72	170	120	125	67	-8	-44	8	19	-2
2552	France	Femme	47	2	45	65	41	14	50	50	47	50	23	cadre et profession intellectuelle sup&#233rieure	4	100	mari&#233	1	3	100	76	100	76	50	50	50	50	50	50	23	22	50	50	165	70	70	24	1	0	0	0	0
2553	France	Homme	36	2	77	78	82	17	77	35	78	27	25	cadre et profession intellectuelle sup&#233rieure	5	61	PACS&#233	1	1	67	37	51	50	19	72	74	31	22	67	22	32	89	77	177	65	65	30	-10	12	-45	43	-53
2554	France	Femme	48	1	84	86	17	79	87	16	84	52	16	cadre et profession intellectuelle sup&#233rieure	6	86	mari&#233	1	2	96	28	13	34	55	50	37	39	76	36	0	73	1	75	162	79	80	68	-73	-74	40	-2	5
2555	France	Homme	56	1	23	59	59	69	60	66	79	66	58	profession interm&#233diaire	2	59	mari&#233	1	3	81	78	64	62		64		39	33	38	25	38	62	71	173	72	73	3	-13	-9	-5
2557	France	Femme	65	2	75	71	6	50	13	18	73	73	50	retrait&#233	4	90	mari&#233	1	0	77	57	67	51	23	23	50	50	21	20	20	19	78	78	163	58	58	20	1	0	1	0	0
2558	France	Femme	28	1	23	25	25	25	25	68	19	21	16	&#233l&#232ve ou &#233tudiant	6	69	c&#233libataire	2	0	97	73	75	77		64									162	57	57	24
2559	France	Femme	22	2	32	37	50	50	25	59	50	50	0	&#233l&#232ve ou &#233tudiant	4	100	c&#233libataire	2	0	100	50	73	67	64	61	61	66	43	68	14	0	5	6	157	50	50	50	14	-1	-25	-5	3
2560	France	Femme	34	1	29	58	44	62	67	40	43	45	67	profession interm&#233diaire	5	39	concubinage	1	2	72	37	67	70	37	63	38	67	37	64	38	40	50	50	156	48	49	35	-2	0	-27	-29	-26
2563	France	Femme	25	2	19	37	0	50	27	0	36	77	8	profession interm&#233diaire	4	87	c&#233libataire	2	0	88	15	8	9	12	27	89	72	10	19	0	61	9	12	169	53	53	73	-61	-3	-9	17	-15
2564	France	Femme	30	2	75	57	23	78	70	85	26	50	16	&#224 la recherche d'un emploi	2	100	PACS&#233	1	0	48	32	32	34	50	70		34	0	32	65	80	50	63	150	50	50	16	-15	-13	-32		-20
2565	France	Femme	27	1	36	37	38	64	15	35	36	64	32	profession interm&#233diaire	4	65	mari&#233	1	0	66	68	65	64	24	21	77	72	23	25	28	40			163	68	68	-2	-12		-2	5	3
2566	France	Homme	35	2	80	78	64	78	67	39	71	50	50	cadre et profession intellectuelle sup&#233rieure	4	30	PACS&#233	1	1	85	58	60	37	68	80	44	32	50	42	42		50	67	175	53	53	27		-17	8	12	-12
2567	France	Femme	39	1	50	23	18	24	33	55	21	51	50	profession interm&#233diaire	2	50	mari&#233	1	2	50	89	72	79	17	25	77	80	20	24	25	22	9	7	172	60	61	-39	3	2	-4	-3	-8
2569	France	Homme	45	2		79	75	78	68	81		67	67	artisan, commer&#231ant ou chef d'entreprise	4	86	mari&#233	1	2	88	50			50	61		18	8	50	14		50		175	73	75	38			-42		-11
2570	France	Femme	25	2	50	63	4	100	65	13	50	50	0	&#233l&#232ve ou &#233tudiant	4	100	concubinage	1	0	100	62	63	50	84	100	50	50	21	50	0	50	0	50	156	58	59	38	-50	-50	-29	0	-16
2571	France	Femme	24	1	22	67	0	66	100	34	35	37	80	cadre et profession intellectuelle sup&#233rieure	6		concubinage	1	0	76	82	85	87					43	90		64			169	64	64	-6			-47
2572	France	Femme	54	2	75	67	71		61	32	70	61		&#224 la recherche d'un emploi	2	86	mari&#233	1	3	45	20	39	19	50	82	66	39	35	36	41	44	21	63	163	75	75	25	-3	-42	-1	27	-32
2573	France	Femme	25	1	0	33	10	50	59	77	0	42	0	cadre et profession intellectuelle sup&#233rieure	6	50	c&#233libataire	2	0	80	50	35	62	11	27	88	76	79	92	7	17	0	0	160	58	58	30	-10	0	-13	12	-16
2575	France	Homme	27	2	71	12	0	0	0	100	24	100	0	cadre et profession intellectuelle sup&#233rieure	4	100	c&#233libataire	2	0	98	50	36	45	35	38	100	100	76	92	0	76	0		170	73	71	48	-76		-16	0	-3
2577	France	Homme	50	2	12	25	20	21	21	69	14	78	0	cadre et profession intellectuelle sup&#233rieure	5	91	c&#233libataire	2	0	86	65	83	83	19	31	82	68	0	5	0	6	0	0	178	91	90	21	-6	0	-5	14	-12
2578	France	Homme	26	2	21	50	28	78	72	21	20	76	71	profession interm&#233diaire	4	26	c&#233libataire	2	0	32	32	32	32	18	37	74	52	73	28	22	50	11	17	175	63	63	0	-28	-6	45	22	-19
2580	France	Homme	43	1		69	0	84	87	34	27	28	89	profession interm&#233diaire	4	82	mari&#233	1	2	81	83	99	96							27	44		64	183	70	69	-2	-17
2582	France	Femme	58	2	71	76	75	2	4	69	70	75		profession interm&#233diaire	4	85	mari&#233	1	0	99	35	35	40	68	95	18	4	50	70	2	25	3	4	163	67	67	64	-23	-1	-20	14	-27
2583	France	Femme	58	1	86	63	24	77	60	58	73	61	63	ouvrier	4	74	veuf	3	2	53	51	50	50	50	50	50	47	50	50	50	77	50	50	162	52	52	2	-27	0	0	3	0
2584	France	Femme	24	1	37	40	4	85	98	9	37	4		profession interm&#233diaire	4	22	PACS&#233	1	0	64	93	70	71	3	14	91	81	50	50	14	10	4	8	155	57	57	-29	4	-4	0	10	-11
2585	France	Femme	33	1	16	21	21	19	27	33	18	77	14	profession interm&#233diaire	4	21	mari&#233	1	0	73	50	50	31	26	21	79	73	50	72	29	57	50	50	165	80	80	23	-28	0	-22	6	5
2586	France	Femme	42	1	27	26	0	57	19	28	23	56	0	profession interm&#233diaire	4	65	mari&#233	1	2	50	49	50	50	31	30	67	68	65	71	50	50	0	19	157	62	61	1	0	-19	-6	-1	1
2587	France	Femme	41	1	86	100	74	100	79	31	76	54	90		2	77	mari&#233	1	3	100	14	11	13	52	83	75	21	50	53	26	6	24	77	162	88	88	86	20	-53	-3	54	-31
2590	France	Femme	49	2	60	50	82	2	69	50	50	75	5	profession interm&#233diaire	2	95	c&#233libataire	2	0	98	50	17	16	98	98	8	44	35	50	69	85	49	14	163	45	45	48	-16	35	-15	-36	0
2591	France	Homme	47	2	2	16	2	2	50	74	16	85	72	profession interm&#233diaire	5	68	mari&#233	1	6	97	50	50	66	50	50	50	50	28	66	2	22	2	2	165	60	60	47	-20	0	-38	0	0
2595	France	Femme	52	1	86	85	86	87	50	33	92	50	17	profession interm&#233diaire	4	97	c&#233libataire	2	2	93	94	95	93	59	59	49	50	81	50	0	0	11	11	171	74	78	-1	0	0	31	-1	0
2596	France	Femme	53	1	100	100	100	98	68	0	100	0	75	profession interm&#233diaire	4	100	concubinage	1	2	100	0	0	0	50	75	100	0	0	75	1	50		98	175	77	77	100	-49		-75	100	-25
2597	France	Homme	31	1				77	100	0	76	68	73	cadre et profession intellectuelle sup&#233rieure	6	86	mari&#233	1	2	93	0	20	70	36			36	18	20	20	34			179	90	91	93	-14		-2
2598	France	Femme	21	2	68	74	75	79	80	27	67	68		&#233l&#232ve ou &#233tudiant	4	82	c&#233libataire	2	0	50	17	21	19				30				73			178	79	79	33
2600	France	Homme	25	2	11	0	0	0	74	23	0	21	18	artisan, commer&#231ant ou chef d'entreprise	5	71	c&#233libataire	2	0	100	71	100	100	0	27	100	29	0	22	0	20	0	5	183	87	86	29	-20	-5	-22	71	-27
2601	France	Femme	28	2	35	25	23	0	0	0	0	50	0	cadre et profession intellectuelle sup&#233rieure	5	76	c&#233libataire	2	0	50	50	50	50	98	31	50	50	50	25	19	14	73	74	164	78	76	0	5	-1	25	0	67
2604	France	Femme	27	1	33	63	64	61	50	50	59	42	40	profession interm&#233diaire	4	73	c&#233libataire	2	0	73	34	34	34		70					27	73			169	64	62	39	-46
2607	France	Femme	45	1	74	72	26	46	51	28	34	26	22	profession interm&#233diaire	2	78	mari&#233	1	2	82	17	20	18	19	40	100	76	70	70	11	72	28	32	154	52	54	65	-61	-4	0	24	-21
2609	France	Femme	52	2	68	67	40	39	36	70	71	26	18	cadre et profession intellectuelle sup&#233rieure	5	66	mari&#233	1	4	80	58	55	60	50	60	44	50	70	90	8	35	50	50	160	72	71	22	-27	0	-20	-6	-10
2610	France	Femme	31	1		71	25	89		41	76	40	12	cadre et profession intellectuelle sup&#233rieure	6	86	PACS&#233	1	1	100	26	28	30	62	75	62	37			0	27		69	175	62	62	74	-27			25	-13
2611	France	Femme	43	2	98	100	100	99	99	2	99	2	26	profession interm&#233diaire	4	70	concubinage	1	2	50	50	50	50	50	100	50	0	50	50	50	50	0	68	160	74	74	0	0	-68	0	50	-50
2612	France	Femme	38	1	63	77	77	78	60	67	73	43	55	profession interm&#233diaire	4	90	PACS&#233	1	2	74	37	39	39	58	62	50	50	50	50	27	63	63	68	157	89	90	37	-36	-5	0	0	-4
2614	France	Femme	39	1	27	71	20	76	65	32	74	25	27	profession interm&#233diaire	4	28	mari&#233	1	2	79	20	28	28	50	50	50	50	50	50	13	79	50	50	160	81	77	59	-66	0	0	0	0
2615	France	Femme	43	2	79	83	86		50	50	82	54	50	profession interm&#233diaire	4	85	mari&#233	1	0	19	20	23	26	17	89	80	0	26	29	5	89	50	86	158	58	59	-1	-84	-36	-3	80	-72
2616	France	Femme	54	1	100	98	67	100			86	84		ouvrier	2	87	c&#233libataire	2		98	50	50	50		81							52	97	150	60	60	48		-45
2617	France	Femme	23	2	74	66	17	60	17	55	63	76	33	&#233l&#232ve ou &#233tudiant	4		c&#233libataire	2	0	38	72	74	39	34	19	77	75	49	30	33	70	87	90	168	88	89	-34	-37	-3	19	2	15
2618	France	Femme	52		15	18	15	50	82	29	26	23	28	ouvrier	2	90	c&#233libataire	2	2	50	50	50	50	50	50	50	50	50	51	91	100	6	11	162	57	57	0	-9	-5	-1	0	0
2619	France	Femme	28	1	0	23	0	0	100	29	0	83	0		2	15	c&#233libataire	2	0	84	40	100	100	34	78	73	45	27	26	27	38	0	0	159	45	45	44	-11	0	1	28	-44
2621	France	Homme	39	1	4	0	0	12	0	0	0	11	15	cadre et profession intellectuelle sup&#233rieure	6	74	PACS&#233	1	0	79	63	83	80			50				22	67			176	85	85	16	-45
2622	France	Femme	34	2	0	80	0	0	0	0	0	0	0		4	100	mari&#233	1	1	100	100	100	100	2	1	100	74	0	0	0	0	67	77	155	83	79	0	0	-10	0	26	1
2623	France	Femme	38	2	78	81	81	4	81	84	80	82	80	&#224 la recherche d'un emploi	4	79	concubinage	1	1	24	23	23	22	26	83	20	28	71	76	21	81	18	84	167	70	72	1	-60	-66	-5	-8	-57
2626	France	Femme	25	1	4	5	9	78	94	26	11	26	13	cadre et profession intellectuelle sup&#233rieure	6	69	concubinage	1	0	84	17	16	12			67	55	37	64	10	66	4	5	165	68	68	67	-56	-1	-27	12
2627	France	Femme	35	1	82	82	83	83	84	2	81	66	62	profession interm&#233diaire	2	79	concubinage	1	1	71	71	70	69	18		96	79	72	73	4	4	65	96	158	70	70	0	0	-31	-1	17
2628	France	Homme	22	2	0	61	68	74	70	18	18	0	0	&#233l&#232ve ou &#233tudiant	5	29	c&#233libataire	2	0	100	0	0	0	2	73	69	20	0	0	20	100	0	0	175	69	68	100	-80	0	0	49	-71
2629	France	Femme	50	1	43	69	81	54	39	33	53		38	ouvrier	2	67	c&#233libataire	2	2	24	29	50	56			82	22	29	50	30	21	28		160	60	57	-5	9		-21	60
2630	France	Femme	41	1										profession interm&#233diaire	4		concubinage	1	4	88	76	76	73									12	14	160	60	60	12		-2
2631	France	Femme	32	1	69	86	50	91	68	19	71	11	68	cadre et profession intellectuelle sup&#233rieure	6	10	concubinage	1	0	90	82	91	91	39	48	82	59	10	11	10	39	15	37	170	90	90	8	-29	-22	-1	23	-9
2633	France	Femme	42	2	100	83	100	0	53	14	53	65	1	ouvrier	2	100	autre		2	93	31	24	25	67	19	50	50	87	70	16	69	49	50	158	54	54	62	-53	-1	17	0	48
2635	France	Femme	36	2	69	57	17	15	25	72	28	68	70	cadre et profession intellectuelle sup&#233rieure	5	78	concubinage	1	1	80	18	20	21	21	37	78	65	21	23	25	7	10	12	180	77	78	62	18	-2	-2	13	-16
2637	France	Femme	23	2	61	92	68	66	20	75	84	86	1	&#233l&#232ve ou &#233tudiant	5	66	c&#233libataire	2	0	83	12	30	28	24	14	74	58	62	70	5	65			171	80	84	71	-60		-8	16	10
2638	France	Femme	36	2	82	79	50	84	15	50	88	20	50	profession interm&#233diaire	5	77	c&#233libataire	2	2	71	83	78	76	19	61	87	21	70	31	30	68	50	62	170	53	53	-12	-38	-12	39	66	-42
2639	France	Femme	39	1		74	63	65	82	25	50	50	50	cadre et profession intellectuelle sup&#233rieure	6	73	PACS&#233	1	3	70	76	73	72	22	41	87	77	8	40	7	2	51	65	164	67	66	-6	5	-14	-32	10	-19
2640	France	Femme	60	2	48	20	0	0	29	1	8	0	0	profession interm&#233diaire	2	70	autre		2	98	98	97	97	9						21	33			159	54	55	0	-12
2641	France	Homme	22	2	57	57	59	59	0	100	20	100	0	&#224 la recherche d'un emploi	4	100	c&#233libataire	2	0	100	100	100	100	13	16	81	82	21	23	0	0	87	89	183	67	67	0	0	-2	-2	-1	-3
2642	France	Homme	29	2	50	50	50	43	67	50	50	53	25	cadre et profession intellectuelle sup&#233rieure	4	82	mari&#233	1	1	34	66	70	69	50	50	50	87	50	50	50	50	25	69	175	104	103	-32	0	-44	0	-37	0
2644	France	Femme	48	2	68	74	72	50	65	22	77	50	50	ouvrier	2	80	mari&#233	1	2	83	32	34	26	35	66	81	50	72	31	20	66	21	68	162	55	55	51	-46	-47	41	31	-31
2646	France	Homme	26	1	36	34	0	15	23	81	23	78	11	cadre et profession intellectuelle sup&#233rieure	6	84	c&#233libataire	2	0	50	30	29	69	21	83	85	85	23	24	31	67	0	16	174	82	82	20	-36	-16	-1	0	-62
2648	France	Femme	42	2	15	62	82	99	97	1	29		98	cadre et profession intellectuelle sup&#233rieure	5	76	mari&#233	1	3	70	99	100	98							11	1			165	51	51	-29	10
2650	France	Femme	55	1	80	82	80	100	83	25	85	26	50	profession interm&#233diaire	4	83	mari&#233	1	2	50	50	50	50	27	57	50	50	50	66	50	50	29	71	160	68	68	0	0	-42	-16	0	-30
2651	France	Femme	29	2	50	3	0	0	93	76	5	0	3	artisan, commer&#231ant ou chef d'entreprise	4	100	concubinage	1	0	10	100	100	96	86	0	0	100	50	50	8	7	56	50	160	55	54	-90	1	6	0	-100	86
2652	France	Homme	27	2	38	32	29	31	29	74	35	63	26	&#233l&#232ve ou &#233tudiant	5	27	c&#233libataire	2	0	67	63	81	71	30	27	75		32	31	23	25			179	70	70	4	-2		1		3
2653	France	Femme	51	1	100	100	68	100	89	26	76	21	79	profession interm&#233diaire	4	50	c&#233libataire	2	1	73	22	21	19	7	78	73	6	34	45	8	31	50	71	172	61	59	51	-23	-21	-11	67	-71
2655	France	Femme	21	2	0	0	0	0	0	100	0	33	0	&#233l&#232ve ou &#233tudiant	4	23	c&#233libataire	2	0	70	100	71	100	0	0	100	50	100	100	0	33	0	0	162	63	63	-30	-33	0	0	50	0
2657	France	Femme	37	1	79	78	72		73	23	61			profession interm&#233diaire	4	63	mari&#233	1	2	89	87	79	85	50	50	72	50	41	60	5	6	4	9	158	45	46	2	-1	-5	-19	22	0
2658	France	Femme	50	2		51	0	78	50	68	61		0	ouvrier	2	99	c&#233libataire	2	1	77	50	83	39	50	75		19		81		90		70	173	81	84	27					-25
2659	France	Femme	32	2	61	50	22	77	73	50	50	63		&#224 la recherche d'un emploi	2	70	PACS&#233	1	1	79	48	34	35	22	57	83	23	23	23	21	50	50	50	160	57	57	31	-29	0	0	60	-35
2662	France	Femme	36	1	1	3	3	1	2	4	0	50	3	profession interm&#233diaire	2	91	c&#233libataire	2	0	96	61	60	68	8	10	74	74	61	63	18	15	8	9	165	67	67	35	3	-1	-2	0	-2
2663	France	Femme	34	1	50	60	50	75	50	30	64	64	21	profession interm&#233diaire	4	73	PACS&#233	1	2	50	50	50	66	50	64	50	50	50	50	33	17	50	50	175	70	70	0	16	0	0	0	-14
2665	France	Femme	38	2	50	50	25	52	12	50	25	16	11	ouvrier	4	93	mari&#233	1	3	89	71	76	63	50	50	50	50	35	37	50	10	21	19	160	55	55	18	40	2	-2	0	0
2666	France	Femme	21	2	0	21	0	63	69	26	0	31	0	&#233l&#232ve ou &#233tudiant	4	72	c&#233libataire	2	0	80	100	100	74	31	72	73	32	73	14	0	85	0	0	169			-20	-85	0	59	41	-41
2667	France	Homme	32	2	12	65	71	96	29	12	13	84	70	cadre et profession intellectuelle sup&#233rieure	6	97	mari&#233	1	2	70	26	31	28	19	74	37	24	25	29	5	3	8	8	178	68	68	44	2	0	-4	13	-55
2668	France	Femme	50	2	66	98	85	50		84	83	83		profession interm&#233diaire	4	100	mari&#233	1	1	77	0	23	19		83	50	9			20	80			160	54	56	77	-60			41
2670	France	Femme	37	1	50	50	21	50	33	65	25	73	16	profession interm&#233diaire	4	72	concubinage	1	2	91	93	78	75	24	23	80	81	23	21	3	2	50	50	165	58	58	-2	1	0	2	-1	1
2672	France	Homme	23	2	78	72	23	100	100	0	100		84	&#233l&#232ve ou &#233tudiant	4	100	c&#233libataire	2	0	79	70	73	84	15		91	26	84	15	60	35	79	79	169	96	91	9	25	0	69	65
2674	France	Homme	32	1	22	63	21	65	66	39	62	59	20	cadre et profession intellectuelle sup&#233rieure	6	72	PACS&#233	1	0	39	58	65	64	19	21	73	73	50	50	0	0	0	0	170	71	71	-19	0	0	0	0	-2
2677	France	Homme	27	2	0	0	0	0	0	78	0	39	1	&#233l&#232ve ou &#233tudiant	6	100	c&#233libataire	2	0	94	80	70	82	59	59	41		18	12	8	66	5	0	176	110	112	14	-58	5	6		0
2678	France	Homme	34	2	80	73	75	38	67	23	79	34	8	profession interm&#233diaire	4	69	c&#233libataire	2	0	74	72	77	77	78	24	84	21	76	17	14	64	50	71	170	60	60	2	-50	-21	59	63	54
2679	France	Femme	58	1	73	77	27	78	22		67		3	profession interm&#233diaire	4		mari&#233	1	0	91	89	89	90	15	28	76	50	8	26	0	2	0	57	154	61	58	2	-2	-57	-18	26	-13
2680	France	Femme	52	1	69	93	63	64	14	7	88		8	profession interm&#233diaire	4	80	mari&#233	1	2	96	43	43	50	73					1	2	71			163	70	70	53	-69
2681	France	Femme	56	2	55	90	58	75	50	50	50	50		cadre et profession intellectuelle sup&#233rieure	5	64	mari&#233	1	2	83	50	50	50	50	62	63	31	50	57	0	30	23	50	170	52	52	33	-30	-27	-7	32	-12
2682	France	Femme	23	2	4	2	100	3	83	100		100	2	profession interm&#233diaire	4	100	c&#233libataire	2	0	100	0	0	0	0	80	90	34	35	17	0	100	2	0	161	48	52	100	-100	2	18	56	-80
2684	France	Femme	23	2	61	86	86		76	77	78	45		&#233l&#232ve ou &#233tudiant	4	84	concubinage	1	0	100	80	68	85	45	62	82	62	66	67	15	69	66	74	169	67	68	20	-54	-8	-1	20	-17
2685	France	Femme	28	1	23	33	12	10	19	14	15	32	8	cadre et profession intellectuelle sup&#233rieure	5	77	concubinage	1	0	68	23	72	26	26	50	50	28	19	20	22	55	50	50	169	63	63	45	-33	0	-1	22	-24
2687	France	Femme	45	1	98	98	60	99	98	12	98	16	50		2	100	PACS&#233	1	1	96	23	24	23	17	61	98	20	50	58	11	44	10	69	152	61	62	73	-33	-59	-8	78	-44
2688	France	Femme	31	1	100	100	52	100	100	30	100	0	100	ouvrier	4	50	c&#233libataire	2	1	100	0	0	0	13	80	78	0	21	22	2	0	21	100	169	73	76	100	2	-79	-1	78	-67
2689	France	Homme	35	2	66	87	62	92	60	90	75	38	24	profession interm&#233diaire	4	89	c&#233libataire	2	0	78	18	21	23	27	65	37	19	40	37	22	73			169	80	83	60	-51		3	18	-38
2694	France	Femme	20	2	100	94	79	82		78	97	81	39	&#233l&#232ve ou &#233tudiant	5	78	c&#233libataire	2	0	66	62	80	80									65	73	175	72	69	4		-8
2696	France	Femme	40	2	100	100	77	100	75	4	90	85	0	profession interm&#233diaire	4	100	PACS&#233	1	1	100	78	74	75		82	86	14	20	77	3	42	28	100	171	63	62	22	-39	-72	-57	72
2698	France	Femme	56		67	69	50	68	70	50	64	63	59		4	65	mari&#233	1		85	28	27	27	30	79	78	19	34	50	24	73	9	25	170	68	68	57	-49	-16	-16	59	-49
2700	France	Homme	33	1	74	58	68	31	29	33	66	70	8	artisan, commer&#231ant ou chef d'entreprise	4	89	PACS&#233	1	1	86	17	20	40	47	29	63	40	22	22	22	66	69	79	188	85	87	69	-44	-10	0	23	18
2701	France	Femme	68	2	81	35	29		10		18	50	50	retrait&#233	4		mari&#233	1		81	50	50	50	50	50	74	50	23	32	20	50	18	50	152	41	41	31	-30	-32	-9	24	0
2703	France	Homme	32	1	88	75	74	75	2	67	33	91		ouvrier	2	69	c&#233libataire	2	0	100	97	99	98	50	50							2	2	184	73	73	3		0			0
2704	France	Femme	28	2	97	97	83	98	81	88	97	81	28	&#233l&#232ve ou &#233tudiant	4	73	concubinage	1	2	78	74	77	79	65	24	78	68	83	40	17	19	21	72	155	85	84	4	-2	-51	43	10	41
2706	France	Femme	28	1	77	88	80	90	63	81	82	65	35	profession interm&#233diaire	4	93	PACS&#233	1	1	97	17	81	78	17	90	90	13	50	77	5	22	72	85	176	89	89	80	-17	-13	-27	77	-73
2707	France	Femme	69	2	50				72					retrait&#233	4	50	veuf	3	1	50	50	50	50	50	50	50	50	50	50	50	50	50	50	169	55	55	0	0	0	0	0	0
2708	France	Femme	56	1	41	33	4	36	5	84	7	68	7	profession interm&#233diaire	4	90	mari&#233	1	2	95	50	50	55	31	50	75	50	50	50	2	18	50	50	158	52	52	45	-16	0	0	25	-19
2709	France	Homme	52	2	95	75	80		83	86	82	56		&#224 la recherche d'un emploi	4	97	c&#233libataire	2	0	24	41	88	68	63	83			43	76	41	30	72	88	181	77	79	-17	11	-16	-33		-20
2711	France	Femme	19	2	0	0	68	76	69	26	68	24	80	&#233l&#232ve ou &#233tudiant	4	84	c&#233libataire	2	0	32	87	87	81			3	9	0	0	0	81	0	0	177	70	68	-55	-81	0	0	-6
2713	France	Femme	23	2	78	67	25	50	22	50	72	42	3	&#233l&#232ve ou &#233tudiant	4	0	c&#233libataire	2	0	74	65	50	100	23	63	82	58	19	50	0	65	50	76	163	50	49	9	-65	-26	-31	24	-40
2716	France	Homme	41	2	25	16	29	79	29	27	57	35	70	cadre et profession intellectuelle sup&#233rieure	4	78	mari&#233	1	2	70	40	56	58	50	50							0	0	187	92	93	30		0			0
2717	France	Femme	29	2	50	77	0	100	68	100	60	85	65	profession interm&#233diaire	4	13	concubinage	1	3	100	89	50	100	5	33	94	72	50	50	0	80	11	33	159	69	64	11	-80	-22	0	22	-28
2718	France	Femme	35	2	1	15	50	50	64	33	50	67	50	cadre et profession intellectuelle sup&#233rieure	5	74	mari&#233	1	2	84	39	75	37	50	50	78	78	77	36	0	33	72	72	177	86	86	45	-33	0	41	0	0
2720	France	Femme	40	2	50	70	74	72	72	66	53	61	31	profession interm&#233diaire	4	93	mari&#233	1	2	90	50	56	50	22	50	89	50	50	50	12	40	11	11	162	68	68	40	-28	0	0	39	-28
2721	France	Homme	41		21	13	10	0	11	79	13	50	0	&#224 la recherche d'un emploi	2	77	c&#233libataire	2	0	75	60	69	60							22				182	74	75	15
2722	France	Homme	22	2	25	20	23	21	22	22	18	20	26	&#224 la recherche d'un emploi	4	86	concubinage	1	0	85	63	70	69	26	34	75	78	71	27	13	30	23	24	176	63	60	22	-17	-1	44	-3	-8
2724	France	Femme	49	2	62	72	85	50	85	68	82	62	32	profession interm&#233diaire	4	73	concubinage	1	1	100	100	100	100	88	64	82	75	87	77	0	0	60	89	165	73	73	0	0	-29	10	7	24
2725	France	Homme	32	1	34	90	60	98	65	33	57	56	76	ouvrier	4	90	concubinage	1	0	68	25	23	27	21	67	75	39	16	28	8	31	50	50	165	78	79	43	-23	0	-12	36	-46
2726	France	Homme	35	1	50	50	50	50	100	50	50	50	50	profession interm&#233diaire	4	50	PACS&#233	1	1	100	100	100	100	16	15	78	75	34	33	27	27	50	50	170	54	52	0	0	0	1	3	1
2727	France	Femme	71	2	50	67	66	4	68	4	65	50	3	retrait&#233	1	75	autre		4	100	50	55	55	50	82	80	69	50	50	0	19	50	86	160	79	81	50	-19	-36	0	11	-32
2728	France	Femme	33	2			92		100	99		76	86	profession interm&#233diaire	4	83	PACS&#233	1	2	89	61	69	61		79	74	40	35	61		78	81	87	163	63	62	28		-6	-26	34
2730	France	Femme	49	2	88	98	82	79	98	2	77	21	86	cadre et profession intellectuelle sup&#233rieure	5	95	mari&#233	1	2	99	92	96	97	21	88	78	23	18	93	0	75	78	98	171	53	53	7	-75	-20	-75	55	-67
2732	France	Homme	58	1	50	50	50	74	50	50	50	50	50	ouvrier	2	95	mari&#233	1	3	100	100	100	100	2	100	100	100	73	50	0	0	50	50	176	79	79	0	0	0	23	0	-98
2733	France	Femme	32	2	66	50	81	86	21	50	84	28	68	profession interm&#233diaire	4	100	PACS&#233	1	1	75	50	50	50	27	55	26	59	26	26	9	62	12	12	160	49	49	25	-53	0	0	-33	-28
2734	France	Femme	27	1	98	98	68	100	76	6	82	15	27	cadre et profession intellectuelle sup&#233rieure	5	69	PACS&#233	1	0	50	50	65	82	26	74	79	79	72	100	9	10	26	87	168	60	60	0	-1	-61	-28	0	-48
2735	France	Femme	46	2	26	50	0	24	24	98	8	73	12	profession interm&#233diaire	4	50	concubinage	1	2	64	93	67	95	77	18	28	50	50	22	25	22	18	17	173	66	66	-29	3	1	28	-22	59
2737	France	Femme	22		50	50	50	79	82	50	50	14	75	ouvrier	2	50	concubinage	1	0	100	0	0	2	42	43	70	61	20	54	19	83	18	20	165	65	67	100	-64	-2	-34	9	-1
2739	France	Homme	23	2	71	81	74		74	33	74	43		cadre et profession intellectuelle sup&#233rieure	5	73	PACS&#233	1	0	100	26	68	23	21		84	44	83	37	23	79			160	53	53	74	-56		46	40
2743	France	Femme	47	1		8	1		11	11		78		ouvrier	2		c&#233libataire	2	2	100	1	7	63	9	24	83		3	7	1	100	8	9	160	64	63	99	-99	-1	-4		-15
2745	France	Femme	35	2	16	73	79	90	2	51	15	35	4	artisan, commer&#231ant ou chef d'entreprise	2	100	c&#233libataire	2	0	89	25	25	25	28	69	86	33	17	66	8	100			160	49	53	64	-92		-49	53	-41
2746	France	Homme	26	2	19	30	29	40	25	72	31	66	0	&#233l&#232ve ou &#233tudiant	5	76	c&#233libataire	2	0	69	69	66	68											175	65	66	0
2747	France	Femme	33	2	100	100	100	0	100		100	50	0	&#224 la recherche d'un emploi	4	100	PACS&#233	1	2	100	0	0	0	0	55	100	73	0		0	0	0	0	160	79	79	100	0	0		27	-55
2750	France	Femme	33	2	61	88	61	88	41	87	61	72	22	profession interm&#233diaire	4	74	PACS&#233	1	0	50	31	50	50	50	82	68	30	25	76	0	11	62	79	178	80	76	19	-11	-17	-51	38	-32
2752	France	Femme	34	1	100	100	0	100	100	0	100	0	40	profession interm&#233diaire	4	100	PACS&#233	1	2	98	81	92	81		56	95	94	84	12	14	34	0	100	158	70	71	17	-20	-100	72	1
2753	France	Femme	18	2	11	6	87	12	37	24	10	12	0	&#233l&#232ve ou &#233tudiant	2	82	c&#233libataire	2	0	99	2	24	22	19	77	80	32	14	15	2	76	1	3	158	55	52	97	-74	-2	-1	48	-58
2756	France	Homme	26	1	2	76	0	78	68	90	27	23	41	cadre et profession intellectuelle sup&#233rieure	6	79	c&#233libataire	2	0	100	0	0	0	8	65	94	35	38	38	5	98	5	0	178	90	90	100	-93	5	0	59	-57
2759	France	Femme	28	2	19	15	14	75	65	71	13	76	81	profession interm&#233diaire	6	72	c&#233libataire	2	0	100	0	0	0	0	0	100	100	0	0	0	0	0	0	158	55	55	100	0	0	0	0	0
2760	France	Femme	40	1	73	91	92	85	85	10	78	82	50	profession interm&#233diaire	5	50	mari&#233	1	1	50	25	23	27	15	77	76	14		85	4	6	64	73	175	60	57	25	-2	-9		62	-62
2761	France	Femme	66	2	50	50	24	66	25	77	70	66	50	profession interm&#233diaire	4	50	mari&#233	1		92	75	50	50	1	34	82	50	9	50	4	51	50	50	168	63	63	17	-47	0	-41	32	-33
2764	France	Femme	34	1	97	70	88	98	69	1	67	4	92	ouvrier	2	74	mari&#233	1	3	66	12	7	6		97	69	0		99	16	9	23	99	168	80	80	54	7	-76		69
2765	France	Femme	56	2	79	81	82		50	11	50	9			2	95	mari&#233	1	3	93	12	12	1	26		50	28	27	75	13	78		84		69	69	81	-65		-48	22
2766	France	Femme	40	1	29	31	30	83	97	5	35	94	81	profession interm&#233diaire	2	79	PACS&#233	1	2	77	21	19	20	21	93		19	12	93		2	21	22	139	64	64	56		-1	-81		-72
2767	France	Femme	38	2	91	88	61		67	24	80	33		artisan, commer&#231ant ou chef d'entreprise	4	100	concubinage	1	2	81	31	32	28	40	91	39	36	35	37	18	24	21	68	158	64	64	50	-6	-47	-2	3	-51
2768	France	Femme	22	2	5	90	79	61		0	26		6	&#233l&#232ve ou &#233tudiant	4	85	concubinage	1	0	98	97	100	98	39	68	64	39	100	90	0	0	100	100	167	49		1	0	0	10	25	-29
2770	France	Homme	43	2	0	29	36	43	0	100	0		0	artisan, commer&#231ant ou chef d'entreprise	2		c&#233libataire	2	0	100	98	0	28	100	100	77	64	0	11	17	80	0	0	175	70	70	2	-63	0	-11	13	0
2771	France	Femme	44	2	85	90	71	5	88	11	87	26	73	profession interm&#233diaire	4	100	c&#233libataire	2	2	84	31	66	29	6	19	86	30	16	53	11	37	16	88	164	57	56	53	-26	-72	-37	56	-13
2772	France	Homme	59	1	11	0	12	11	82	28	1	70	16	profession interm&#233diaire	2	71	concubinage	1	1	73	25	68	68	50				62	63	4	51	5	0	170	82	82	48	-47	5	-1
2774	France	Femme	47	2	86	85	62		71	27	79	28	15	profession interm&#233diaire	5	87	c&#233libataire	2	0	50	30	35	60			41	12		39	59	86	26	82	167	66	68	20	-27	-56		29
2775	France	Femme	58	2	88	50	2	1	2	2	50	0	0	&#224 la recherche d'un emploi	2	52	c&#233libataire	2	0	50	12	16	12	14	50	50	50	50	21	25	68	41	50	168	75	75	38	-43	-9	29	0	-36
2776	France	Femme	62	2	12	50	50		25	84	50	75		retrait&#233	5	75	PACS&#233	1	2	65	50	50	50	50	50	72	50	50	50	26	25	25	25	160	70	70	15	1	0	0	22	0
2777	France	Femme	47	1	0	29	27	100	100	29	26	73	50	profession interm&#233diaire	4	100	concubinage	1	3	50	50	50	50	50	50	62	93	50	50	34	50	0	0	161	55	55	0	-16	0	0	-31	0
2778	France	Femme	30	2	67	72	50	0	88	38	86	33	31	artisan, commer&#231ant ou chef d'entreprise	6	61	concubinage	1	1	94	74	58	63	85	36	66	17	78	21	0	33	63	78	170	85	86	20	-33	-15	57	49	49
2779	France	Femme	37	1	50	79	79	84	99	14	80	69	77	cadre et profession intellectuelle sup&#233rieure	6	46	PACS&#233	1	2	69	21	53	25	28	64	50	50	21	58	16	14	18	22	164	64	65	48	2	-4	-37	0	-36
2780	France	Homme	29	2	16	64	0	1	0	39		20	0	cadre et profession intellectuelle sup&#233rieure	5	70	c&#233libataire	2	0	30	28	28	28							67	83	0	0	175	72	72	2	-16	0
2781	France	Femme	37	1	22	30	18	79	68	50	63	68	68	profession interm&#233diaire	4	90	mari&#233	1	2	73	43	50	50	29	39	50	17	32	78	22	14	23	23	178	70	70	30	8	0	-46	33	-10
2783	France	Femme	25	1	22	14	10	11	75	19	5	44	5	ouvrier	2	87	c&#233libataire	2	0	91	21	50	23	21	70	96	50	95	64	8	7	5	5	163	70	70	70	1	0	31	46	-49
2787	France	Femme	32	2	50	26	84	0	71	17	33	37	0	profession interm&#233diaire	4	100	concubinage	1	2	100	0	0	0	50	100	100	15	0	0	23	0	0	21	187	110	105	100	23	-21	0	85	-50
2788	France	Femme	49	1	98	99	100	100	100	100	100	100	100	profession interm&#233diaire	4	48	mari&#233	1	2	99	2	34	36	0	99	100	4	3	99	1	100	50	77	149	72	75	97	-99	-27	-96	96	-99
2789	France	Femme	31	1	50		50	50	50	2	50	50	50	cadre et profession intellectuelle sup&#233rieure	5		mari&#233	1	1	2	99	0		4	0	72	71	3		98	0	63	65	157	65	66	-97	98	-2		1	4
2791	France	Homme	22	1	0	70	9	87	24	44	23	73	0	profession interm&#233diaire	4	74	PACS&#233	1	0	74	36	43	37	51	59	79	64	10	36	36	61	9	9	181	67	67	38	-25	0	-26	15	-8
2792	France	Femme	41	2	100	100	100	100	50	0	100	0		cadre et profession intellectuelle sup&#233rieure	4	100	c&#233libataire	2	3	51	100	0	0	100	100	100		50	100	0	100	50	100	168	65	64	-49	-100	-50	-50		0
2794	France	Femme	56	2	50	50	48	73	68	50	50	50	50	profession interm&#233diaire	4	96	c&#233libataire	2	0	73	2	18	16	0	36	96	19	2	0	8	70	2	7	171	61	61	71	-62	-5	2	77	-36
2795	France	Femme	34	1	50	59	3	61	50	43	0	100	0	profession interm&#233diaire	4	87	PACS&#233	1	0	100	89	92	93	70	29	100	100	0	0	0	0	0	6	178	68	68	11	0	-6	0	0	41
2797	France	Femme	35	1	0	100	100	94	100	82	81	30	90	profession interm&#233diaire	4	0	mari&#233	1	2	85	76	80	83		72		29	67	100				63	169	74	74	9			-33
2799	France	Femme	39	1	84	86	75	93	88	12	88	27	83	cadre et profession intellectuelle sup&#233rieure	5	90	PACS&#233	1	2	75	36	84	59	37	58	60	39	36	56	6	5	31	69	162	68	67	39	1	-38	-20	21	-21
2801	France	Homme	29	2					100	91				cadre et profession intellectuelle sup&#233rieure	5	50	concubinage	1	2	100	69	69	80	13	16	81	50	50	95	24	100	57	57	190	75	75	31	-76	0	-45	31	-3
2803	France	Femme	23	1	22	69	13	31	16	80	12	70	0	&#233l&#232ve ou &#233tudiant	4	82	c&#233libataire	2	0	76	15	24	30	68	25	63	62	22	21	0	20	0	0	166	45	45	61	-20	0	1	1	43
2805	France	Femme	41	2	80						53			profession interm&#233diaire	4	100	mari&#233	1	2	66	66	73	81	15	1	78	3	11	2	6	5	0	50	162	53	53	0	1	-50	9	75	14
2806	France	Femme	55	1	65	72	33	86	12	72	70	28	2	profession interm&#233diaire	4	68	concubinage	1	0	81	43	43	50	22	20	86	85	30	29	26	57	19	19	161	62	63	38	-31	0	1	1	2
2807	France	Femme	28	2	59	42	41	41	41	19	18	21	35	cadre et profession intellectuelle sup&#233rieure	5	80	PACS&#233	1	1	64	43	44	41	42	60	71	77	33	32	22	75	50	50	158	52	52	21	-53	0	1	-6	-18
2808	France	Homme	22	2	26	23	18	21	21	18	17	48	19	&#233l&#232ve ou &#233tudiant	4	73	c&#233libataire	2	0	60	35	34	61	20	22	86	70	22	24	18	80	0	1	175	69	68	25	-62	-1	-2	16	-2
2812	France	Femme	71	2	81	100	98		79	100	85	55		retrait&#233	4	100	mari&#233	1	0	78	79	76	50	50	71	50	50	50	50	10	11		63	167	67	66	-1	-1		0	0	-21
2813	France	Femme	37	2	64	87	100	22	20	4	73	18		ouvrier	4		c&#233libataire	2	2	76	14	16	81		61		22	17	85	9	11	73	44	168	85	86	62	-2	29	-68
2814	France	Femme	25	2	55		19	22	65	91	12	42	16	cadre et profession intellectuelle sup&#233rieure	5	41	autre		0	76	70	70	50	29	46	50	36	25	27	22	23	0	0	150	55	55	6	-1	0	-2	14	-17
2815	France	Femme	35	2	63	66	60	64	81	6	65	50	75	cadre et profession intellectuelle sup&#233rieure	6	30	PACS&#233	1	2	77	63	82	81	23	63	84	65	16	20	10	14	15	14	160	55	55	14	-4	1	-4	19	-40
2817	France	Homme	24	2	63	59	24	25	2	91	25	37	36	cadre et profession intellectuelle sup&#233rieure	6	63	c&#233libataire	2	0	84	86	74	78	22	20	75	64	83	16	11	52	2	2	185	90	90	-2	-41	0	67	11	2
2818	France	Femme	32	1	83	87	88	89	26	93	50	95	8		4	90	mari&#233	1	2	78	32	35	36	25	50	98	84	65	66	3	48	50	50	169	135	136	46	-45	0	-1	14	-25
2819	France	Homme	55	2	93	74	64	50	65	50	79	50	50	ouvrier	2	85	mari&#233	1	2	76	50	50	50	36	62	65	70	50	50	23	39	28	81	173	88	89	26	-16	-53	0	-5	-26
2820	France	Femme	37	1	84	73	18	86	69	64	69	77	66	profession interm&#233diaire	4	23	mari&#233	1	2	75	21	29	31	9	82	87	3	66	67	9	82		62	168	57	57	54	-73		-1	84	-73
2822	France	Femme	61	2	87	85	77		73	75	81	15	68	profession interm&#233diaire	2	91	mari&#233	1	2	88	52	63	64	50	63	80	45	50	83	30	45	30	68	170	100	98	36	-15	-38	-33	35	-13
2823	France	Femme	38	2	4	17	18	17	12	85	8	88	6	profession interm&#233diaire	4	68	mari&#233	1	2	66	62	0	50	22	22	83	85	50	50	28	32	14	15	162	74	76	4	-4	-1	0	-2	0
2824	France	Homme	32	2	79	96	23	28	76	68	91	14	50	cadre et profession intellectuelle sup&#233rieure	5	93	concubinage	1	0	95	94	94	97	50	73	78	29	28	50	0	0	62	76	193	63	60	1	0	-14	-22	49	-23
2825	France	Femme	24	1	50	24	22	50	69	74	52	70	94	&#233l&#232ve ou &#233tudiant	4	63	concubinage	1	0	69	33	50	29	35	50	69	62	23	25	21	21	13	12	162	59	60	36	0	1	-2	7	-15
2826	France	Homme	21	2	9	10	87	83	96	94	91	6	77	&#233l&#232ve ou &#233tudiant	4	97	c&#233libataire	2	0	50	26	24	24	84	84									180	90	85	24					0
2828	France	Femme	19	1	12	6	4	9	2	93	4	83	1	profession interm&#233diaire	4	60	c&#233libataire	2	0	90	10	34	16	38	53	79	57	28	24	0	24	27	72	166	56	56	80	-24	-45	4	22	-15
2829	France	Femme	30		54	69	39	86	66	32	65	32	50	profession interm&#233diaire	5	90	concubinage	1	0	82	39	61	55	58	47	75	36	65	50	3	68	55	54	158	106	110	43	-65	1	15	39	11
2831	France	Femme	30	2	0	0	0	0	0	100	0	81	0	cadre et profession intellectuelle sup&#233rieure	5	62	PACS&#233	1	0	100	92	100	100	28	0	100	100	50	50	0	19	0	0	168	65	65	8	-19	0	0	0	28
2834	France	Femme	41	2	88	78	19	20	50	50	73	50	27	profession interm&#233diaire	4	77	c&#233libataire	2	0	50	30	29	31	30	50	34	17	0	0	12	10	23	39	167	130	130	20	2	-16	0	17	-20
2835	France	Femme	37	1	74	27	76	100	99	13	32	68	74	ouvrier	4	93	PACS&#233	1	2	100	61	81	98	12	18	97	72	4	18	0	1	18	79	175	91	88	39	-1	-61	-14	25	-6
2836	France	Femme	29	1	82	75	29	98	65	22	72	98	85	profession interm&#233diaire	2	97	concubinage	1	1	85	84	82	84	26	29	78	21	15	77	21	4	85	97	176	90	90	1	17	-12	-62	57	-3
2837	France	Femme	22	1	50	77	2	74	71	50	50	50	70	profession interm&#233diaire	4	79	c&#233libataire	2	0	50	50	50	50	50	71	50	30	50	50	32	30	50	50	163	59	59	0	2	0	0	20	-21
2838	France	Femme	49	2	8	9	77	4	8	93	12	84	13	profession interm&#233diaire	4	0	mari&#233	1	2	95	5	73	53	50	92	25	19	50	20	3	95	96	100	162			90	-92	-4	30	6	-42
2839	France	Homme	30	2	50	54	6	10	12	91	8	87	9	cadre et profession intellectuelle sup&#233rieure	5	71	PACS&#233	1	0	65	88	77	79	50	34	50	65	50	34	50	57	50	80	182	78	78	-23	-7	-30	16	-15	16
2840	France	Femme	24	2	50	68	100		100	25	67	0		artisan, commer&#231ant ou chef d'entreprise	4	100	concubinage	1	0	100	24	78	79	33	75	76	41	32	30	23	71	0	50	168	72	76	76	-48	-50	2	35	-42
2841	France	Femme	33	2	60	64	77	82	50	79	67	73	50	profession interm&#233diaire	4	76	PACS&#233	1	2	82	68	82	73	59	31	63	65	62	37	25	13	17	95	172	78	78	14	12	-78	25	-2	28
2842	France	Homme	54	2	31	12	21	88	79	91				ouvrier	2	99	concubinage	1	0	100	20	22	15	0	0	100	92	0	75	0	31	0	0	183	125	126	80	-31	0	-75	8	0
2843	France	Femme	58	2	50	69	28	0	28	79	50	50	0	&#224 la recherche d'un emploi	4	79	mari&#233	1	3	63	50	50	50	30	61	50	31	50	61	50	50	19	23	170	104	104	13	0	-4	-11	19	-31
2848	France	Femme	48	1	50	74	9	64	75	36	64	50	34	profession interm&#233diaire	4	85	mari&#233	1	2	91	42	46	43	50	50	61	40	55	40	26	42	50	50	153	78	78	49	-16	0	15	21	0
2849	France	Femme	31	1	3			83	77	17					4	66	c&#233libataire	2	0	88	27	27	30	24		70	31							157	86	86	61				39
2850	France	Homme	58	2	83	84	8	2	68	36	87	16	2	&#224 la recherche d'un emploi	4	98	mari&#233	1	2	13	15	15	50	33	73			70	17	8	72	17	19	170	86	90	-2	-64	-2	53		-40
2851	France	Homme	31	2	69		25		76	19			68	cadre et profession intellectuelle sup&#233rieure	5	73	mari&#233	1	2	66	90	89	97				39	70		6	23	50	80	184	78	78	-24	-17	-30
2852	France	Femme	27	2	41	60	42	65	68	4	41	25	67	cadre et profession intellectuelle sup&#233rieure	5	92	c&#233libataire	2	0	50	29	27	1	50	50	50	50	50	50	16	63	50	50	180	73	74	21	-47	0	0	0	0
2853	France	Homme	32	1	61	62	38	77	77	22	56	37	67	cadre et profession intellectuelle sup&#233rieure	6	31	mari&#233	1	0	77	74	74	73	62	62	77	45	30	39	28	28	34	40	176	85	85	3	0	-6	-9	32	0
2854	France	Femme	24	2	64	70	84	10	11	93	76	98	9	&#224 la recherche d'un emploi	4	84	concubinage	1	0	85	58	26	63		70	50	73	65	72	5	67	12	12	168	60	60	27	-62	0	-7	-23
2855	France	Femme	31	2	72	95	63	89	65	34	83	35	36	profession interm&#233diaire	4	81	c&#233libataire	2	0	65	37	37	37	35	64	59	42	39	40	15	65	29	58	159	61	63	28	-50	-29	-1	17	-29
2856	France	Femme	53	1	77	71	12	84		25			78	profession interm&#233diaire	5		mari&#233	1	2	85	23	39	65	19	70	12	18	10	49	8	82	21		162	58	56	62	-74		-39	-6	-51
2857	France	Femme	24	2	36	33	29	29	18	78	34	50	27	cadre et profession intellectuelle sup&#233rieure	5	66	c&#233libataire	2	0	50	50	44	50	50	50	59	58	43	29	39	58			153	52	52	0	-19		14	1	0
2858	France	Femme	40	2	77	77	100	100	100	29	64	37	81	cadre et profession intellectuelle sup&#233rieure	5	85	mari&#233	1	2	50	100	100	100	50	79	79	50	81	99	32	2	14	69	160	72	69	-50	30	-55	-18	29	-29
2859	France	Femme	60	2	0	0	0	24	2	86	6	50	23	cadre et profession intellectuelle sup&#233rieure	5	80	autre		3	87	87	89	88			37	27	75	55	24	13	0	0	165	62	62	0	11	0	20	10
2860	France	Femme	35	1	50				48	50	70		20	profession interm&#233diaire	2	98	mari&#233	1	2	97	64	65	68	50	75	88	16	4		14	87	98	97	164	56	56	33	-73	1		72	-25
2862	France	Femme	32	2	100	65	65	68	64	98	64	77	0	profession interm&#233diaire	4		PACS&#233	1	1	100	21	21	19	0	4	100	61			31	32	0	75	175	73	72	79	-1	-75		39	-4
2863	France	Homme	30	2	19	20	81	81	76	41	21	66	22	profession interm&#233diaire	4	78	concubinage	1	1	75	16	20	77	39	70	70	50	50	50	22	92	13	24	188	147	134	59	-70	-11	0	20	-31
2864	France	Femme	54	1	66	70	31	77	76	52	68	54	56	profession interm&#233diaire	4	100	mari&#233	1	2	100	79	78	80	21	50	72	50	50	50	50	69	100	100	157	48	48	21	-19	0	0	22	-29
2865	France	Femme	25	1	78	78		63	87	28	62	35	59	profession interm&#233diaire	4	67	c&#233libataire	2	0	100	0	27	28						50	0	86			165	50	50	100	-86
2867	France	Femme	24	1	19	14	40	36		9	8	50	3	profession interm&#233diaire	2	87	c&#233libataire	2	0	86	42	50	50	50	50	84	50	14	34	50	84	5	4	170	56	56	44	-34	1	-20	34	0
2869	France	Homme	49	2	87	86	90	84	80	0	85	50	82	cadre et profession intellectuelle sup&#233rieure	4	100	mari&#233	1	3	74	36	36	33	50	50	50	50	50	50	19	21	25	68	185	90	88	38	-2	-43	0	0	0
2870	France	Femme	29	1	74	70	28	86	65	67	71	71	32	profession interm&#233diaire	4	68	c&#233libataire	2	0	73	31	50	39	50	64	67	38	59	42	32	82	30	65	165	72	74	42	-50	-35	17	29	-14
2871	France	Femme	42	1	91	89	57	100	50	50	67	99	80	profession interm&#233diaire	2	92	c&#233libataire	2	3	74	0	34	0	63	98	27	100	69	85	10	3	58	95	164	70	70	74	7	-37	-16	-73	-35
2873	France	Femme	41	2	11	50	70	16	57	3	50	50	16	&#224 la recherche d'un emploi	6	2	mari&#233	1	2	50	37	36	36	23	50	88	89	20	21	22	10	0	0	167			13	12	0	-1	-1	-27
2874	France	Homme	22	1	18	40	26	49	73	29	13	50	35	&#233l&#232ve ou &#233tudiant	5	69	c&#233libataire	2	0	64	63	65	39	34	65	68	36	35	36	60	63	10	13	173	56	57	1	-3	-3	-1	32	-31
2875	France	Femme	33	2	27	27	32	59	67	36	65	71	4	artisan, commer&#231ant ou chef d'entreprise	5	41	mari&#233	1	1	86	77	38	64	31	31	59	74	29	26	18	15	50	50	163	83	83	9	3	0	3	-15	0
2876	France	Femme	39	1	75	77	76	75	73	21	91	20	50	ouvrier	4	96	mari&#233	1	1	69	50	24	66	35	62	50	25	26	64	20	80	50	70	160	59	59	19	-60	-20	-38	25	-27
2877	France	Homme	25	1	50	50	50	50	50	2	21	30	0	cadre et profession intellectuelle sup&#233rieure	6	100	concubinage	1	0	100	0	0	0	0	67	97	30	18	17	31	17	20	35	180	75	74	100	14	-15	1	67	-67
2879	France	Femme	34	2	45	49	25	62	88	33	50	67	60	cadre et profession intellectuelle sup&#233rieure	6	69	c&#233libataire	2	1	72	62	64	54	18	37	88	80	17	41	8	24	50	50	166	59	59	10	-16	0	-24	8	-19
2880	France	Homme	45	2	74	76	22	94	77	15				ouvrier	2	68	PACS&#233	1	2	86	22	25	25									12		178	90	92	64
2881	France	Femme	26	1	71	72	56	86	2	0	62	0	56	profession interm&#233diaire	4	79	mari&#233	1	0	50	21	25	23	31	50	21	36	71	24	17	78	21	71	155	44	46	29	-61	-50	47	-15	-19
2882	France	Femme	58	1	94	94		86						profession interm&#233diaire	4		mari&#233	1	0	94	50	50	50	50	50	50	50	50	50	9	19	50	72	168	75	75	44	-10	-22	0	0	0
2883	France	Femme	33	2	83	53	50	50	76	10	22	62	50	artisan, commer&#231ant ou chef d'entreprise	2	81	concubinage	1	2	98	50	50	50											177	75	75	48
2885	France	Femme	56		72	72	1	100	0	67	61	36	0	cadre et profession intellectuelle sup&#233rieure	5	88	mari&#233	1	0	86	95	100	80	55	16	90	57	83	0	0	0	0	0	168	58	58	-9	0	0	83	33	39
2886	France	Homme	37	1	25	64	32	28	26	76	28	20	14	profession interm&#233diaire	4	66	PACS&#233	1	1	45	50	56	59	50													-5
2887	France	Femme	22	1	74	82	15	92	76	22	65	29	30	profession interm&#233diaire	5	3	PACS&#233	1	0	96	74	76	73	50	50	50	50	50	50	50	50	4	1	177	59	59	22	0	3	0	0	0
2888	France	Femme	24	2	76	81	82	77	76	73	77	74	74	cadre et profession intellectuelle sup&#233rieure	5	77	concubinage	1	0	100	64	81	49	26	87	73	25	41	70	31	0	64	81	160	54	53	36	31	-17	-29	48	-61
2889	France	Homme	31	1	15	17	18	22	25	60	17	50	26	profession interm&#233diaire	5	71	PACS&#233	1	0	50	50	50	50	50	50	50	50	50	50	50	50	0	0	180	69	69	0	0	0	0	0	0
2890	France	Homme	29	1	80	82	73	93	73	30	6	50	16	cadre et profession intellectuelle sup&#233rieure	6	87	mari&#233	1	0	92	9	23	84	50	65	76	82	19	16	0	8	10	10	179	63	63	83	-8	0	3	-6	-15
2891	France	Homme	26	2	61	31	31	28	28	29	63	66	0	artisan, commer&#231ant ou chef d'entreprise	5	68	concubinage	1	0	77	26	35	34	38	38	67	32	34	58	4	74	25	24	160	48	49	51	-70	1	-24	35	0
2893	France	Femme	26	2	10	33	34	100	64	34	76	77	59	artisan, commer&#231ant ou chef d'entreprise	5	90	c&#233libataire	2	0	75	7	28	22	32	77		31	32	63	0	63	14	28	170	60	60	68	-63	-14	-31		-45
2895	France	Femme	27	2	55	83	69	100	64	38	35	32	61	cadre et profession intellectuelle sup&#233rieure	5	96	PACS&#233	1	0	100	8	41	33	50	62	85	32	50	44	19	0	24	80	160	62	62	92	19	-56	6	53	-12
2896	France	Femme	18	2	60	54	62	43	23	28	30	63	32	&#233l&#232ve ou &#233tudiant	4	88	c&#233libataire	2	0	100	68	69	89	37	43	83	73	52	42	0	85	59	75	166	50	53	32	-85	-16	10	10	-6
2897	France	Femme	72	2	37	37	5	4	4	1	12	1	0	retrait&#233	1	55	mari&#233	1	0	50	50	50	50	15	18	78	78	17	14	20	21	17	16	168	73	73	0	-1	1	3	0	-3
2898	France	Femme	37	2	78	76	80	99	80	26	76	79	8	profession interm&#233diaire	2	78	c&#233libataire	2	0	94	81	81	81	12	76	95	34		30	5	70	73	97	170	107	107	13	-65	-24		61	-64
2899	France	Femme	25	2	76	75	21	96	75	21	85	15	50	cadre et profession intellectuelle sup&#233rieure	5	83	concubinage	1	0	98	85	88	77	25	59	88	38	1	2	0	11	23	60	162	118	118	13	-11	-37	-1	50	-34
2900	France	Femme	26	1	66	66	74	97	95	11	83	50	68	cadre et profession intellectuelle sup&#233rieure	4		concubinage	1	1	100	50	31	29	34	50	74	65	32	50	0	85	0	0	148	47	50	50	-85	0	-18	9	-16
2901	France	Femme	44	1	79	86	85	85	85	100	63	50	59	ouvrier	4	68	mari&#233	1	1	84	74	50	50	16	77	100	30	50	73	18	20	2	7	160	58	55	10	-2	-5	-23	70	-61
2906	France	Femme	21	2	1	0	0	0	0	80	18	80	8	&#233l&#232ve ou &#233tudiant	4	35	c&#233libataire	2	0	98	100	100	100	31	7	77	71	24	25	7	3	61	61	152	42	41	-2	4	0	-1	6	24
2909	France	Femme	24	2	21	67	8	15	61	25	66	32	10	&#233l&#232ve ou &#233tudiant	5	60	c&#233libataire	2	0	60	34	24	57	36	63	45	35	16	26	18	29	60	66	165	55	55	26	-11	-6	-10	10	-27
2910	France	Femme	46	1	50	50	50	99	100	5	50	50	50	profession interm&#233diaire	5	50	mari&#233	1	3	50	50	50	50	50	50	50	0	50	100	0	0	50	50	160	75	70	0	0	0	-50	50	0
2911	France	Femme	56	1	23	22	0	16	27	27	2	75	14	profession interm&#233diaire	2	61	mari&#233	1	2	65	31	32	32	17	16	50	50	50	50	50	50	14	16	178	73	72	34	0	-2	0	0	1
2912	France	Femme	60		100	73	0	83	85	11	79	18	80	ouvrier	2	99	PACS&#233	1	1	100	100	100	100	50	100		0		100	0	0	0	0	164	72	72	0	0	0			-50
2914	France	Femme	50	2	0	3	0	0	0	74	1	75	0		2	50	mari&#233	1	1	99	82	81	83	0	1	72	73	23	1	0	0	0	0	170	78	78	17	0	0	22	-1	-1
2917	France	Femme	33	2	61	61	50		67	25	24	55	34		2		mari&#233	1	1	100	50	50	50	50	50	50	50	50	50	50	50	0	16	166	160	160	50	0	-16	0	0	0
2919	France	Femme	26	2	74	73	80	0	0	0	79	16		artisan, commer&#231ant ou chef d'entreprise	4	100	c&#233libataire	2	0	100	0	0	0	0	100	100	21	65	27	0	100	100	100	160	93	94	100	-100	0	38	79	-100
2920	France	Femme	23	1	71	81		100	86	29	80	21	79	&#233l&#232ve ou &#233tudiant	5	70	c&#233libataire	2	0	60	50	50	50	64	96	50	30	81	71	50	60	0	50	170	72	72	10	-10	-50	10	20	-32
2921	France	Femme	19	2	100	100	100	100	80	20	89	12	77	&#233l&#232ve ou &#233tudiant	2	86	c&#233libataire	2	0	76	29	31	69	64	83	23	0	74	80	11	77	20	73	170	49	44	47	-66	-53	-6	23	-19
2922	France	Femme	23	2	86	100	100	79	32	66	100	18	0	&#233l&#232ve ou &#233tudiant	5	80	concubinage	1	0	81	17	15	55	41	64	81	13	75	40	0	24	15	78	160	51	52	64	-24	-63	35	68	-23
2924	France	Femme	21	2	33	68	87	35	75	35	79	29	34	artisan, commer&#231ant ou chef d'entreprise	4	83	PACS&#233	1	0	96	79	73	81	35	36	61	47	38	36	7	34	7	8	163	63	64	17	-27	-1	2	14	-1
2926	France	Femme	20	2	28	37	7	30		82	15	69		&#233l&#232ve ou &#233tudiant	4	85	concubinage	1	0	98	60	20	20	10	41	86	53	30	31	9	53	11	13	160	72	71	38	-44	-2	-1	33	-31
2928	France	Homme	18	2	19	32	0	3	50	36	9	73	1	&#233l&#232ve ou &#233tudiant	2	99	c&#233libataire	2	0	78	13	21	10	10	58	84	74	4	21	4	97	10	9	170	50	50	65	-93	1	-17	10	-48
2930	France	Femme	34	1	50	29	0	24	15	0	7	0	9	profession interm&#233diaire	2	98	concubinage	1	2	50	50	50	50	13	21	82	78	28	27	9	15	0	0	168	53	53	0	-6	0	1	4	-8
2931	France	Femme	21	2	0	12	17	13	79	19	17	12	1	&#233l&#232ve ou &#233tudiant	5	83	c&#233libataire	2	0	100	9	16	25	64	64	81	18	85	70	12	81	0	0	170			91	-69	0	15	63	0
2935	France	Femme	48	1	50	77	78	81	80	0	69	27	72	cadre et profession intellectuelle sup&#233rieure	4	100	mari&#233	1	2	100	100	100	100	50	50	50	23	50	50	19	0	27	50	168	56	56	0	19	-23	0	27	0
2936	France	Femme	21	2	100	100	17	27	76	39	68	64	17	&#233l&#232ve ou &#233tudiant	4	34	c&#233libataire	2	0	1	21	18	29	66	77	75	91	64	66	31	51	84	100	162	50	50	-20	-20	-16	-2	-16	-11
2937	France	Femme	59	1	43	38	50	50	50	50	50	50	23	profession interm&#233diaire	2	50	mari&#233	1	2	50	50	50	50	50	50	50	50	67	50	50	50	50	50	167	64	64	0	0	0	17	0	0
2939	France	Homme	21	2	37	19	0	0	12	83	9	11	11	&#233l&#232ve ou &#233tudiant	4	26	c&#233libataire	2	0	78	63	77	74	20	32	84	60	24	21	20	19	0	0	170	91	90	15	1	0	3	24	-12
2940	France	Femme	21	2	0	3	0	0	0	50	0	100	0	&#233l&#232ve ou &#233tudiant	5	100	c&#233libataire	2	0	100	80	80	79	0	0	100	100	80	81	1	50	0	0	169	53	52	20	-49	0	-1	0	0
2942	France	Homme	48	2	3	68	26			35	16	72		ouvrier	2	100	mari&#233	1	2	100	81	82	81		77	100	69	69	71	3	87			170	79	80	19	-84		-2	31
2943	France	Homme	37	1	0	0	2	100	50	50	50	50	100	cadre et profession intellectuelle sup&#233rieure	5	100	concubinage	1	1	50	0	3	50	100	100	0	0	50	50	100	97	0	0	183	83	85	50	3	0	0	0	0
2944	France	Femme	37	2	58	65	34	81	50	50	50	50	21	profession interm&#233diaire	4	93	mari&#233	1	2	76	27	50	50	50	50	50	50	50	50	27	23	24	26	158	64	65	49	4	-2	0	0	0
2945	France	Femme	38	2	40	82	38	82	38	36	71	67	38	profession interm&#233diaire	5	37	PACS&#233	1	2	86	69	63	68	37	73	70	43	68	78	36	57	34	37	175	62	61	17	-21	-3	-10	27	-36
2946	France	Femme	39	1	87	81	66	68	60	31	71	64	13	ouvrier	2	100	c&#233libataire	2	2	11	20	24	38	66	68	30	24	63	30	27	18	63	33		80	80	-9	9	30	33	6	-2
2948	France	Femme	40	1	50	97	50	98	99	2	97	50	50	cadre et profession intellectuelle sup&#233rieure	4	98	c&#233libataire	2	1	99	0	50	50	3	97	99	50	50	50	2	2	4	86	155	52	50	99	0	-82	0	49	-94
2949	France	Homme	52	1	67	67	42	67	65	82	65	34	68	cadre et profession intellectuelle sup&#233rieure	6	57	c&#233libataire	2	0	78	79	78	84	55	57	41	44	50	50	17	18	50	58	181	75	75	-1	-1	-8	0	-3	-2
2952	France	Femme	36	2	14	40	61	66	79	59	58	67	32	cadre et profession intellectuelle sup&#233rieure	5	74	c&#233libataire	2	1	100	100	100	100	21	23	99	100	50		0	0	0	0	160	52	52	0	0	0		-1	-2
2953	France	Homme	22	2	0	0	0	100		100	69	100	23	&#233l&#232ve ou &#233tudiant	5	73	c&#233libataire	2		85	100	86	100	26	16	50	100										-15				-50	10
2954	France	Homme	22	2	71	62	66	72	19	59	50	50	70	ouvrier	2	81	c&#233libataire	2		76	39	30	27	6	77	78	50	82	47	6	65	4	3	190	75	76	37	-59	1	35	28	-71
2955	France	Femme	34	2	100	100	7	13	6	10	67	21	3	profession interm&#233diaire	5	97	mari&#233	1	0	99	100	74	99	30	79	66	34	15	24	2	4	28	100	165	140	140	-1	-2	-72	-9	32	-49
2956	France	Homme	27	1	0	29	0	100	100	0	19	19	100	artisan, commer&#231ant ou chef d'entreprise	5	100	c&#233libataire	2	0	85	27	0	3	16	89	83	13	91	92	0	98	100	100	178	82	88	58	-98	0	-1	70	-73
2957	France	Femme	23	1	79	84	20		66	26	73	25		&#233l&#232ve ou &#233tudiant	4	84	c&#233libataire	2	0	78	4	3	0	16	77	79	27	80	50	20	100	14	50	160	58	60	74	-80	-36	30	52	-61
2960	France	Femme	41	1	76	82	27	91	89	50	86	28	50	profession interm&#233diaire	4	26	mari&#233	1	2	59	83	85	81	23	74	74	36	23	66	50	50	50	50	165	70	73	-24	0	0	-43	38	-51
2961	France	Femme	28	1	18	0	1	3	50		2	77	2	cadre et profession intellectuelle sup&#233rieure	6	50	c&#233libataire	2	0	89	70	60	61		38	79		73	24	4	40	11	13	171	62	63	19	-36	-2	49
2962	France	Femme	50	1	23	33	4	69	6	59	51	81	5	profession interm&#233diaire	5	74	mari&#233	1	2	91	52	50	50	59	43	64	50	66	38	3	19	79	80	161	49	49	39	-16	-1	28	14	16
2963	France	Femme	51	2	21	16	7	4	4	6	8		4	cadre et profession intellectuelle sup&#233rieure	6	71	mari&#233	1	2	79	70	72	74	18	20	54	41	24	25	11	10	10	9	169	59	59	9	1	1	-1	13	-2
2964	France	Femme	37	2	72	75	61	3	4	50	67	50	0	&#233l&#232ve ou &#233tudiant	4	69	c&#233libataire	2	2	87	50	50	28	50	71	77	32	68	65	13	36	72	72	175	97	95	37	-23	0	3	45	-21
2973	France	Femme	36	1	71	91	86	99	98	18	91	64	84	profession interm&#233diaire	4	82	c&#233libataire	2	0	86	7	7	9														79
2974	France	Femme	52	2	67	66	8	68	50	50	50	50	1	profession interm&#233diaire	4	92	mari&#233	1	2	100	85	95	92	50	50	63	50	63	63	11	11	7	73	160	70	68	15	0	-66	0	13	0
2975	France	Homme	62	2	0	0	0	97	0	77	1	98	97	retrait&#233	4	91	mari&#233	1	2	50	50	50	50	46	82	97	80	50	50	7	9	50	50	163	66	67	0	-2	0	0	17	-36
2976	France	Homme	57	2	23	27	4	2	28	94	9	70	18	cadre et profession intellectuelle sup&#233rieure	5	66	c&#233libataire	2	0	68	69	71	90	37	36	57	47	32	36	33	24	16	18	170	87	87	-1	9	-2	-4	10	1
2977	France	Femme	28	1	95	73	31	96	97	33	85	25	86	profession interm&#233diaire	4	89	PACS&#233	1	1	50	68	75	74		67	50	5	9	86		14		82	170	70	70	-18			-77	45
2978	France	Femme	22	1	81	76	75	79	27	74	76	24		artisan, commer&#231ant ou chef d'entreprise	5	85	c&#233libataire	2	0	72	15	16	16	50	73	82		25	74	17	85	65	92	159	50	51	57	-68	-27	-49		-23
2979	France	Homme	81	2	77	78	12	1	14	71	74	74	1	retrait&#233	6	97	mari&#233	1	3	84	95	81	83	50	50							50	74	179	85	85	-11		-24			0
2982	France	Femme	23	2	50	31	27	2	50	23	21	61	0	&#224 la recherche d'un emploi	4	71	c&#233libataire	2	0	26	50	50	80	72	50	22	50	50	50	80	71	0	0	157	50	50	-24	9	0	0	-28	22
2983	France	Femme	20	1	61	62	60	63	82	70	80	74	65	ouvrier	2	0	concubinage	1	0	67	25	0	0	0	56	100	75	0	0	0	83	0	0	165	80	80	42	-83	0	0	25	-56
2984	France	Femme	56	2	56	53	27	84	51	63	63	50	21		2	61	c&#233libataire	2	1	74	50	40	40	25	58	78	39	43	53	33	34	59	54	154	101	102	24	-1	5	-10	39	-33
2985	France	Femme	56	2	84	83	15	1		72	72		1	retrait&#233	4	90	mari&#233	1	3	100	92	92	92			89	77	27	13	0	68	50	70	152	47	47	8	-68	-20	14	12
2986	France	Femme	60	1	74	76	17		83	24	21			cadre et profession intellectuelle sup&#233rieure	5	71	c&#233libataire	2	3	69	31	54	58	45	69	51	52					29	60	160	67	67	38		-31		-1	-24
2989	France	Femme	50	1	26	72	81	50	81	100	17	19	73			74	mari&#233	1	3	83	17	57	34	68	100	31	6	50	50	50	50	50	50	165	57	57	66	0	0	0	25	-32
2991	France	Femme	51	1	9	11	12	50	50	50	8	12	27	cadre et profession intellectuelle sup&#233rieure	4	21	mari&#233	1	3	82	83	61	62	26	32	89	58	8	11	17	0	5	6	169	104	104	-1	17	-1	-3	31	-6
2992	France	Femme	42	2	63			100		73	72		71	profession interm&#233diaire	2	71	mari&#233	1	2	67	38	77	75	50	61	50	38			50				167	95	87	29				12	-11
2993	France	Homme	42	2	80	82	86	83	83	82	81	82	50	cadre et profession intellectuelle sup&#233rieure	4	81	PACS&#233	1	3	69	39	30	30	50	50	66	37	50	50	7	81	3	2	180	89	89	30	-74	1	0	29	0
2998	France	Femme	29		65	72	33	75	20	82	67	70	72	profession interm&#233diaire	4	30	c&#233libataire	2	0	55	10	21	18	9	66	71	37	15	87	12	93	15	78	165	62	64	45	-81	-63	-72	34	-57
2999	France	Femme	38	2	50	50	29	50	84	50	50	50	50	cadre et profession intellectuelle sup&#233rieure	5	79	mari&#233	1	0	100	78	71	76	50	50	68	50	67	50	0	0	16	28	171	62	62	22	0	-12	17	18	0
3001	France	Homme	23	1	30	69	56	89	76	14	62	36	30	&#233l&#232ve ou &#233tudiant	5	81	c&#233libataire	2	0	80	80	81	34	75	26	81	38	27	25	11	25	0	15	172	84	84	0	-14	-15	2	43	49
3002	France	Femme	23	1	50	50	50	70	1	98	1	76	1	&#233l&#232ve ou &#233tudiant	5	85	c&#233libataire	2	0	99	50	98	98	50	50	98	81	50	50	1	78	1	23	171	65	65	49	-77	-22	0	17	0
3003	France	Femme	23	1	0	27	0	62	100	37	0	0	0	&#233l&#232ve ou &#233tudiant	5	78	PACS&#233	1	0	98	86	86	89	50	50	50	50	50	50	0	0	0	0	160	56	56	12	0	0	0	0	0
3005	France	Homme	34	2	19	0	0	24	66	100	0		1	cadre et profession intellectuelle sup&#233rieure	5	76	PACS&#233	1	0	66	73	80	79	0	0	100	100	0	0	0	50			185	75	75	-7	-50		0	0	0
3006	France	Femme	34	2	59	65	68	100	35	67	63	44	0	artisan, commer&#231ant ou chef d'entreprise	6	100	PACS&#233	1	0	100	0	18	18	24	83	100	59	0	26	0	83	0	25	169	55	55	100	-83	-25	-26	41	-59
3007	France	Homme	28	1	14	15	20	27	24	22	22	60	21	cadre et profession intellectuelle sup&#233rieure	6	78	PACS&#233	1	0	77	76	78	78	29	30	76	76	24	22	15	60	0	0	180	77	77	1	-45	0	2	0	-1
3008	France	Femme	24	2	37	87	78	77	80	90	81	26	28	&#233l&#232ve ou &#233tudiant	6	73	concubinage	1	0	71	32	100	89	32	79	40	20	78	25	23	86	97	95	168	73	73	39	-63	2	53	20	-47
3010	France	Homme	29	1	3	22	1	33	50	37	1	65	18	cadre et profession intellectuelle sup&#233rieure	6	22	concubinage	1	0	50	50	50	50	26	26	50	50	50	50	22	18	0	1	179	76	76	0	4	-1	0	0	0
3011	France	Femme	59	1	75	90	11	92	91	32	31	32	75	profession interm&#233diaire	4	50	mari&#233	1	2	50	50	50	50	46	87	50	25	50	50	50	17	4	14	164	55	54	0	33	-10	0	25	-41
3015	France	Femme	58	1	100	100	100	100					50				mari&#233	1	2	100	0	3	0			100	0		7	5		0		155	77	71	100				100
3016	France	Femme	29	1	67	100	78	78	50	0	73		50	profession interm&#233diaire	2	100	c&#233libataire	2	0	100	50	39	71	28	73	78	50	20	21	50	67	24	26	153	86	86	50	-17	-2	-1	28	-45
3018	France	Femme	26	1	15	2	0	23	11	13	0	1	7	profession interm&#233diaire	4	68	mari&#233	1	0	99	67	68	68	6	7	96	98	7	5	0	14	3	0	172	59	59	32	-14	3	2	-2	-1
3019	France	Homme	61	2	70	75	77	4	66	36	63	98	8	cadre et profession intellectuelle sup&#233rieure	5	15	concubinage	1	3	72	28	22	26	26	29	71	50	31	33	25	70	7	82	175	61	63	44	-45	-75	-2	21	-3
3020	France	Femme	38	2	87	88	81	85	97	25	63	35	71	cadre et profession intellectuelle sup&#233rieure	4	91	concubinage	1	1	96	48	67	69	23	50	87	15	16	81	8	7	16	35	158	59	61	48	1	-19	-65	72	-27
3022	France	Femme	37	1	57		75	76	69	0	18	18	65	cadre et profession intellectuelle sup&#233rieure	4	30	mari&#233	1	2	100	100	100	100	50			28	77	100	18	0			164	50	53	0	18		-23
3023	France	Femme	36	2	30	0	0	74	0	84	0	81	0	artisan, commer&#231ant ou chef d'entreprise	6	100	mari&#233	1	0	100	76	74	76	0	0	73	73	100	27	0	12	0	0	172	92	91	24	-12	0	73	0	0
3024	France	Femme	54	2	100	100	100		38	50	100	100	50	ouvrier	2	50	mari&#233	1	2	100	1	0	0	50	100	61	0	50	50	43	50	50	100	167	72	71	99	-7	-50	0	61	-50
3025	France	Femme	58	1	60	79	50	84	15	6	50	11	10	cadre et profession intellectuelle sup&#233rieure	4	92	mari&#233	1	3	100	85	79	94	50	88	50	50	50	50	50	50	50	50				15	0	0	0	0	-38
3027	France	Homme	67	2	24	18	0	0	8	72	3	85	2	retrait&#233	5	50	mari&#233	1	5	50	50	50	50	50	90	50	50	50	50	50	50	50	50	178	93	92	0	0	0	0	0	-40
3028	France	Femme	58		73	74	64	81	87	40	69	71	56	profession interm&#233diaire	4	50	mari&#233	1	2	74	50	50	50	50	50	50	50	50	50	50	50	50	50	163	62	60	24	0	0	0	0	0
3031	France	Femme	21	2	68	100	100	100	75	17	70	29	75	&#233l&#232ve ou &#233tudiant	4	100	c&#233libataire	2	0	100	0	0	0	60	100	20	30	37	66	2	0	92		165	75		100	2		-29	-10	-40
3034	France	Homme	52	2	81	50	70		41	8	42	4	39	profession interm&#233diaire	2	97	c&#233libataire	2	0	50	14	19	23	63	50	72	26	50	50	26	25	50	50	173	91	89	36	1	0	0	46	13
3035	France	Femme	49	1	82	83	22	99	83	75	82	18	18	profession interm&#233diaire	2	83	c&#233libataire	2	2	93	50	50	50	13	97	99	10	9	89	10	86	50	98	162	66	64	43	-76	-48	-80	89	-84
3037	France	Homme	47	2	75	79	78	50	79	22	76	21	50	cadre et profession intellectuelle sup&#233rieure	5	70	PACS&#233	1	3	78	18	36	50	36	71	69	33	50	70	22	20	3	68	180	83	82	60	2	-65	-20	36	-35
3039	France	Femme	49	2	98	97	40	20	68	80	98	50	15	cadre et profession intellectuelle sup&#233rieure	5	72	mari&#233	1	3	97	50	50	78	99	92	83	26		75	20	2	73	97	171	72	70	47	18	-24		57	7
3040	France	Femme	51	1	100	100	34	100	100	100	75	83	87	cadre et profession intellectuelle sup&#233rieure	5	79	mari&#233	1	3	99	33	40	39	74	66	76	40	38	46	8	4	9	55	170	67	67	66	4	-46	-8	36	8
3043	France	Femme	27	2	39	55	68	69	78	86	58	34	71	cadre et profession intellectuelle sup&#233rieure	5	91	c&#233libataire	2	0	66	81	78	72	27	70	81	66	39	72	66	22			160	65	65	-15	44		-33	15	-43
3044	France	Femme	56	1	85	88	84	98	50	16	86	22	7	profession interm&#233diaire	4	81	concubinage	1	2	50	50	21	50	50	68	27	23	85	87	4	5	21	50	148	44	44	0	-1	-29	-2	4	-18
3047	France	Femme	39	2	88	82	83	50	50	50	76	71	50	profession interm&#233diaire	5	81	PACS&#233	1	3	89	93	92	90	50	50	50	50	50	50	8	12	6	75	170	65	65	-4	-4	-69	0	0	0
3048	France	Homme	23	2	23	25	28	93	86	23	20	21	80	profession interm&#233diaire	4	68	c&#233libataire	2	0	68	16	17	20	22	82	67	24	19	21	25	86	73	74	185	75	75	52	-61	-1	-2	43	-60
3049	France	Femme	54	2	100	90	50				83	84		profession interm&#233diaire	2	96	c&#233libataire	2	0	98	22	25	83	50							73			158	61	60	76
3051	France	Femme	51	2	80	88	71	100	20	90	16	0	50	profession interm&#233diaire	4	100	autre		0	100	73	72	73	29	100	34	0	27	25	9	100	71	96	160	72	72	27	-91	-25	2	34	-71
3055	France	Femme	57	1	50	50	70	81	80	9	50	30	64	profession interm&#233diaire	4	78	c&#233libataire	2	0	71	44	50	50	66	69	23	11	30	69	66	73	12	13	167	82	84	27	-7	-1	-39	12	-3
3057	France	Femme	28	2	15	14	31	75	78	79	0	22	50	profession interm&#233diaire	5	100	mari&#233	1	1	68	100	100	86	80	73	68	100	76	82	18	3	50		171	65	67	-32	15		-6	-32	7
[truncated: 2,366 more rows]
